# Supplementary material for: Climate and biodiversity targets require larger reductions in animal-sourced foods from current higher-income levels
Source: Research Square preprint supplement (doi:10.21203/rs.3.rs-7629106/v1), 2025-09-29
Supplement: Supplementary file 1 [file fda794fcd9fb4ceb76785c61.xlsx]

## Sheet: Contents
Climate and biodiversity targets require larger reductions in animal-sourced foods from current higher-income levels
Supplymentary data and results
Authors:	Baoxiao Liu 1, *, Laura Scherer 1, Helen Harwatt2, Anniek J. Kortleve1, Paul Behrens 1, 2
Affliations:	1. Institute of Environmental Sciences (CML), Leiden University, 2333 CC, Leiden, the Netherlands. 2. Oxford Martin School, University of Oxford, Oxford OX1 3BD, United Kingdom
	* Baoxiao Liu. Email: b.liu@cml.leidenuniv.nl; liubaoxiao1211@gmail.com
This excel file contains:
Table S1	Income groups classification and 2020 population for each county in FABIO
Table S2	EAT-Lancet reference diet recommended amounts and the intake amounts for diet scenarios
Table S3	Mapping relationships between FABIO items, food classifications in EAT-Lancet reference diet and reporting food groups
Table S4	Energy content and food waste ratio of FABIO items for HICs
Table S5	Energy content and food waste ratio of FABIO items for UMICs
Table S6	Energy content and food waste ratio of FABIO items for LMICs
Table S7	Energy content and food waste ratio of FABIO items for LICs
Table S8	Baseline per capita food consumption (excluding food waste) and the changes under each scenario in HICs
Table S9	Baseline per capita food consumption (excluding food waste) and the changes under each scenario in UMICs
Table S10	Baseline per capita food consumption (excluding food waste) and the changes under each scenario in LMICs
Table S11	Baseline per capita food consumption (excluding food waste) in LICs
Table S12	Food use final demand changes for Moderate ASF scenario (HICs, UMICs and LMICs)
Table S13	Food use final demand changes for Low ASF scenario (HICs, UMICs and LMICs)
Table S14	Food use final demand changes for Zero ASF scenario (HICs, UMICs and LMICs)
Table S15	GHG emissions under the baseline and three scenarios (GHG emission types included in the GHG emissions calculation)
Table S16	National land use residual area and available area under Moderate ASF scenario
Table S17	National land use residual area and available area under Low ASF scenario
Table S18	National land use residual area and available area under Zero ASF scenario
Table S19	Redirected area relative to the cultivated area in baseline under each scenario
Table S20	Land, carbon and biodiversity changes in countries under Moderate ASF scenario (production-based)
Table S21	Land, carbon and biodiversity changes in countries under Low ASF scenario (production-based)
Table S22	Land, carbon and biodiversity changes in countries under Zero ASF scenario (production-based)
Table S23	Land footprint, and calories and protein contribution by food groups for the baseline and scenarios
Table S24	Total embodied land use change of dierary change in different income country groups under each scenario
Table S25	Biodiversity impact by food groups by dietary change in different income country groups under each scenario
Table S26	Carbon impact by food groups by dietary change in different income country groups under each scenario
Table S27	Carbon and biodiversity impact flow by food groups among income groups under each scenario
Table S28	Summarized carbon loss and biodiversity loss by food groups for the baseline and scenarios
Table S29	Results comparison between the grid-based method and extension-based method
Table S30	The estimated uncertainty of the individual food-group results under the baseline and scenarios
Table S31	The estimated uncertainty of the aggregated food-group (food-related) results under the baseline and scenarios

## Sheet: S1
iso3c	area_code	area	region	EU27	Economy	Region	Income.group		Population_2020 (1000)
ARM	1	Armenia	Former USSR	FALSE	Armenia	Europe & Central Asia	Upper middle income		2812.5
AFG	2	Afghanistan	South Asia	FALSE	Afghanistan	South Asia	Low income		38326
ALB	3	Albania	Eastern Europe	FALSE	Albania	Europe & Central Asia	Upper middle income		2872.13
DZA	4	Algeria	Northern Africa	FALSE	Algeria	Middle East & North Africa	Lower middle income		43091
AGO	7	Angola	Southern Africa	FALSE	Angola	Sub-Saharan Africa	Lower middle income		32899
ATG	8	Antigua and Barbuda	Central America	FALSE	Antigua and Barbuda	Latin America & Caribbean	High income		92.377
ARG	9	Argentina	South America	FALSE	Argentina	Latin America & Caribbean	Upper middle income		44908.4
AUS	10	Australia	Oceania	FALSE	Australia	East Asia & Pacific	High income		25544.2
AUT	11	Austria	OECD Europe	TRUE	Austria	Europe & Central Asia	High income		8901.11
BHS	12	Bahamas	Central America	FALSE	Bahamas, The	Latin America & Caribbean	High income		405.779
BHR	13	Bahrain	Middle East	FALSE	Bahrain	Middle East & North Africa	High income		1494.03
BRB	14	Barbados	Central America	FALSE	Barbados	Latin America & Caribbean	High income		280.427
BLX	15	Belgium-Luxembourg	OECD Europe	TRUE
BGD	16	Bangladesh	South Asia	FALSE	Bangladesh	South Asia	Lower middle income		166427
BOL	19	Bolivia (Plurinational State of)	South America	FALSE	Bolivia	Latin America & Caribbean	Lower middle income		11862.3
BWA	20	Botswana	Southern Africa	FALSE	Botswana	Sub-Saharan Africa	Upper middle income		2523.54
BRA	21	Brazil	South America	FALSE	Brazil	Latin America & Caribbean	Upper middle income		212565
BLZ	23	Belize	Central America	FALSE	Belize	Latin America & Caribbean	Upper middle income		392.426
SLB	25	Solomon Islands	Oceania	FALSE	Solomon Islands	East Asia & Pacific	Lower middle income		682.897
BRN	26	Brunei Darussalam	South East Asia	FALSE	Brunei Darussalam	East Asia & Pacific	High income		439.893
BGR	27	Bulgaria	Eastern Europe	TRUE	Bulgaria	Europe & Central Asia	Upper middle income		7020.23
MMR	28	Myanmar	South East Asia	FALSE	Myanmar	East Asia & Pacific	Lower middle income		53228
BDI	29	Burundi	Eastern Africa	FALSE	Burundi	Sub-Saharan Africa	Low income		12053.9
CMR	32	Cameroon	Western Africa	FALSE	Cameroon	Sub-Saharan Africa	Lower middle income		26137.1
CAN	33	Canada	Canada	FALSE	Canada	North America	High income		37758.2
CPV	35	Cabo Verde	Western Africa	FALSE	Cabo Verde	Sub-Saharan Africa	Lower middle income		579.933
CAF	37	Central African Republic	Western Africa	FALSE	Central African Republic	Sub-Saharan Africa	Low income		5272.03
LKA	38	Sri Lanka	South Asia	FALSE	Sri Lanka	South Asia	Lower middle income		21683.2
TCD	39	Chad	Western Africa	FALSE	Chad	Sub-Saharan Africa	Low income		16379.2
CHL	40	Chile	South America	FALSE	Chile	Latin America & Caribbean	High income		19206.7
CHN	41	China, mainland	East Asia	FALSE	China	East Asia & Pacific	Upper middle income		1.424e+06
COL	44	Colombia	South America	FALSE	Colombia	Latin America & Caribbean	Upper middle income		50617
COG	46	Congo	Western Africa	FALSE	Congo, Rep.	Sub-Saharan Africa	Lower middle income		5635.29
CRI	48	Costa Rica	Central America	FALSE	Costa Rica	Latin America & Caribbean	Upper middle income		5105.36
CUB	49	Cuba	Central America	FALSE	Cuba	Latin America & Caribbean	Upper middle income		11309.2
CYP	50	Cyprus	Middle East	TRUE	Cyprus	Europe & Central Asia	High income		1233.78
CSK	51	Czechoslovakia	OECD Europe	FALSE
AZE	52	Azerbaijan	Former USSR	FALSE	Azerbaijan	Europe & Central Asia	Upper middle income		10273.5
BEN	53	Benin	Western Africa	FALSE	Benin	Sub-Saharan Africa	Lower middle income		12466.8
DNK	54	Denmark	OECD Europe	TRUE	Denmark	Europe & Central Asia	High income		5810.78
DMA	55	Dominica	Central America	FALSE	Dominica	Latin America & Caribbean	Upper middle income		71.764
DOM	56	Dominican Republic	Central America	FALSE	Dominican Republic	Latin America & Caribbean	Upper middle income		10939.3
BLR	57	Belarus	Former USSR	FALSE	Belarus	Europe & Central Asia	Upper middle income		9661.04
ECU	58	Ecuador	South America	FALSE	Ecuador	Latin America & Caribbean	Upper middle income		17487.2
EGY	59	Egypt	Northern Africa	FALSE	Egypt, Arab Rep.	Middle East & North Africa	Lower middle income		106539
SLV	60	El Salvador	Central America	FALSE	El Salvador	Latin America & Caribbean	Upper middle income		6280.92
EST	63	Estonia	Former USSR	TRUE	Estonia	Europe & Central Asia	High income		1329.09
FJI	66	Fiji	Oceania	FALSE	Fiji	East Asia & Pacific	Upper middle income		918.091
FIN	67	Finland	OECD Europe	TRUE	Finland	Europe & Central Asia	High income		5525.22
FRA	68	France	OECD Europe	TRUE	France	Europe & Central Asia	High income		64457.8
PYF	70	French Polynesia	Oceania	FALSE	French Polynesia	East Asia & Pacific	High income		300.742
DJI	72	Djibouti	Eastern Africa	FALSE	Djibouti	Middle East & North Africa	Lower middle income		1082.34
GEO	73	Georgia	Former USSR	FALSE	Georgia	Europe & Central Asia	Upper middle income		3769.18
GAB	74	Gabon	Western Africa	FALSE	Gabon	Sub-Saharan Africa	Upper middle income		2267.99
GMB	75	Gambia	Western Africa	FALSE	Gambia, The	Sub-Saharan Africa	Low income		2541.05
DEU	79	Germany	OECD Europe	TRUE	Germany	Europe & Central Asia	High income		83267.7
BIH	80	Bosnia and Herzegovina	Eastern Europe	FALSE	Bosnia and Herzegovina	Europe & Central Asia	Upper middle income		3340.97
GHA	81	Ghana	Western Africa	FALSE	Ghana	Sub-Saharan Africa	Lower middle income		31849.2
KIR	83	Kiribati	Oceania	FALSE	Kiribati	East Asia & Pacific	Lower middle income		125.256
GRC	84	Greece	OECD Europe	TRUE	Greece	Europe & Central Asia	High income		10543.3
GRD	86	Grenada	Central America	FALSE	Grenada	Latin America & Caribbean	Upper middle income		123.159
GTM	89	Guatemala	Central America	FALSE	Guatemala	Latin America & Caribbean	Upper middle income		17231.2
GIN	90	Guinea	Western Africa	FALSE	Guinea	Sub-Saharan Africa	Lower middle income		13041.6
GUY	91	Guyana	South America	FALSE	Guyana	Latin America & Caribbean	High income		791.842
HTI	93	Haiti	Central America	FALSE	Haiti	Latin America & Caribbean	Lower middle income		11234.5
HND	95	Honduras	Central America	FALSE	Honduras	Latin America & Caribbean	Lower middle income		10041.8
HKG	96	China, Hong Kong SAR	East Asia	FALSE	Hong Kong SAR, China	East Asia & Pacific	High income		7501.91
HUN	97	Hungary	Eastern Europe	TRUE	Hungary	Europe & Central Asia	High income		9770.12
HRV	98	Croatia	Eastern Europe	TRUE	Croatia	Europe & Central Asia	High income		4114.64
ISL	99	Iceland	OECD Europe	FALSE	Iceland	Europe & Central Asia	High income		364.34
IND	100	India	South Asia	FALSE	India	South Asia	Lower middle income		1.38997e+06
IDN	101	Indonesia	South East Asia	FALSE	Indonesia	East Asia & Pacific	Upper middle income		270826
IRN	102	Iran (Islamic Republic of)	Middle East	FALSE	Iran, Islamic Rep.	Middle East & North Africa	Lower middle income		86990.2
IRQ	103	Iraq	Middle East	FALSE	Iraq	Middle East & North Africa	Upper middle income		42043
IRL	104	Ireland	OECD Europe	TRUE	Ireland	Europe & Central Asia	High income		4925.07
ISR	105	Israel	Middle East	FALSE	Israel	Middle East & North Africa	High income		8685.59
ITA	106	Italy	OECD Europe	TRUE	Italy	Europe & Central Asia	High income		59639.9
CIV	107	CÃ´te d'Ivoire	Western Africa	FALSE	C™te dÕIvoire	Sub-Saharan Africa	Lower middle income		26477.6
KAZ	108	Kazakhstan	Former USSR	FALSE	Kazakhstan	Europe & Central Asia	Upper middle income		18861.1
JAM	109	Jamaica	Central America	FALSE	Jamaica	Latin America & Caribbean	Upper middle income		2814.47
JPN	110	Japan	Japan	FALSE	Japan	East Asia & Pacific	High income		125543
JOR	112	Jordan	Middle East	FALSE	Jordan	Middle East & North Africa	Lower middle income		10817.1
KGZ	113	Kyrgyzstan	Former USSR	FALSE	Kyrgyz Republic	Europe & Central Asia	Lower middle income		6372.33
KEN	114	Kenya	Eastern Africa	FALSE	Kenya	Sub-Saharan Africa	Lower middle income		51460.2
KHM	115	Cambodia	South East Asia	FALSE	Cambodia	East Asia & Pacific	Lower middle income		16296.3
PRK	116	Democratic People's Republic of Korea	East Asia	FALSE	Korea, Dem. People's Rep.	East Asia & Pacific	Low income		25813.2
KOR	117	Republic of Korea	East Asia	FALSE	Korea, Rep.	East Asia & Pacific	High income		51858.1
KWT	118	Kuwait	Middle East	FALSE	Kuwait	Middle East & North Africa	High income		4468.36
LVA	119	Latvia	Former USSR	TRUE	Latvia	Europe & Central Asia	High income		1907.24
LAO	120	Lao People's Democratic Republic	South East Asia	FALSE	Lao PDR	East Asia & Pacific	Lower middle income		7265.65
LBN	121	Lebanon	Middle East	FALSE	Lebanon	Middle East & North Africa	Lower middle income		5694.52
LSO	122	Lesotho	Southern Africa	FALSE	Lesotho	Sub-Saharan Africa	Lower middle income		2239.6
LBR	123	Liberia	Western Africa	FALSE	Liberia	Sub-Saharan Africa	Low income		5034.19
LBY	124	Libya	Northern Africa	FALSE	Libya	Middle East & North Africa	Upper middle income		6612.03
LTU	126	Lithuania	Former USSR	TRUE	Lithuania	Europe & Central Asia	High income		2835.9
MAC	128	China, Macao SAR	East Asia	FALSE	Macao SAR, China	East Asia & Pacific	High income		670.019
MDG	129	Madagascar	Eastern Africa	FALSE	Madagascar	Sub-Saharan Africa	Low income		27879.1
MWI	130	Malawi	Southern Africa	FALSE	Malawi	Sub-Saharan Africa	Low income		19120.9
MYS	131	Malaysia	South East Asia	FALSE	Malaysia	East Asia & Pacific	Upper middle income		33003.6
MDV	132	Maldives	South Asia	FALSE	Maldives	South Asia	Upper middle income		510.89
MLI	133	Mali	Western Africa	FALSE	Mali	Sub-Saharan Africa	Low income		20886.8
MLT	134	Malta	OECD Europe	TRUE	Malta	Middle East & North Africa	High income		509.595
MRT	136	Mauritania	Western Africa	FALSE	Mauritania	Sub-Saharan Africa	Lower middle income		4440.93
MUS	137	Mauritius	Eastern Africa	FALSE	Mauritius	Sub-Saharan Africa	Upper middle income		1296.96
MEX	138	Mexico	Central America	FALSE	Mexico	Latin America & Caribbean	Upper middle income		125610
MNG	141	Mongolia	East Asia	FALSE	Mongolia	East Asia & Pacific	Lower middle income		3266.46
MAR	143	Morocco	Northern Africa	FALSE	Morocco	Middle East & North Africa	Lower middle income		36488.8
MOZ	144	Mozambique	Southern Africa	FALSE	Mozambique	Sub-Saharan Africa	Low income		30720.8
MDA	146	Republic of Moldova	Former USSR	FALSE	Moldova	Europe & Central Asia	Upper middle income		3095.02
NAM	147	Namibia	Southern Africa	FALSE	Namibia	Sub-Saharan Africa	Upper middle income		2467.08
NPL	149	Nepal	South Asia	FALSE	Nepal	South Asia	Lower middle income		28999.2
NLD	150	Netherlands	OECD Europe	TRUE	Netherlands	Europe & Central Asia	High income		17402.3
ANT	151	Netherlands Antilles	Central America	FALSE
NCL	153	New Caledonia	Oceania	FALSE	New Caledonia	East Asia & Pacific	High income		285.619
MKD	154	North Macedonia	Eastern Europe	FALSE	North Macedonia	Europe & Central Asia	Upper middle income		2114.02
VUT	155	Vanuatu	Oceania	FALSE	Vanuatu	East Asia & Pacific	Lower middle income		307.972
NZL	156	New Zealand	Oceania	FALSE	New Zealand	East Asia & Pacific	High income		5026.5
NIC	157	Nicaragua	Central America	FALSE	Nicaragua	Latin America & Caribbean	Lower middle income		6709.7
NER	158	Niger	Western Africa	FALSE	Niger	Sub-Saharan Africa	Low income		23881.7
NGA	159	Nigeria	Western Africa	FALSE	Nigeria	Sub-Saharan Africa	Lower middle income		205781
NOR	162	Norway	OECD Europe	FALSE	Norway	Europe & Central Asia	High income		5367.95
PAK	165	Pakistan	South Asia	FALSE	Pakistan	South Asia	Lower middle income		225113
PAN	166	Panama	Central America	FALSE	Panama	Latin America & Caribbean	High income		4265.54
CZE	167	Czech Republic	Eastern Europe	TRUE	Czechia	Europe & Central Asia	High income		10537.9
PNG	168	Papua New Guinea	Oceania	FALSE	Papua New Guinea	East Asia & Pacific	Lower middle income		9648.82
PRY	169	Paraguay	South America	FALSE	Paraguay	Latin America & Caribbean	Upper middle income		6573.04
PER	170	Peru	South America	FALSE	Peru	Latin America & Caribbean	Upper middle income		33090.3
PHL	171	Philippines	South East Asia	FALSE	Philippines	East Asia & Pacific	Lower middle income		111288
POL	173	Poland	Eastern Europe	TRUE	Poland	Europe & Central Asia	High income		38478
PRT	174	Portugal	OECD Europe	TRUE	Portugal	Europe & Central Asia	High income		10298.4
GNB	175	Guinea-Bissau	Western Africa	FALSE	Guinea-Bissau	Sub-Saharan Africa	Low income		1993.3
TLS	176	Timor-Leste	South East Asia	FALSE	Timor-Leste	East Asia & Pacific	Lower middle income		1289.75
PRI	177	Puerto Rico	Central America	FALSE	Puerto Rico	Latin America & Caribbean	High income		3280.22
ERI	178	Eritrea	Eastern Africa	FALSE	Eritrea	Sub-Saharan Africa	Low income		3523.65
QAT	179	Qatar	Middle East	FALSE	Qatar	Middle East & North Africa	High income		2828.63
ZWE	181	Zimbabwe	Southern Africa	FALSE	Zimbabwe	Sub-Saharan Africa	Lower middle income		15505.2
ROU	183	Romania	Eastern Europe	TRUE	Romania	Europe & Central Asia	High income		19489.7
RWA	184	Rwanda	Eastern Africa	FALSE	Rwanda	Sub-Saharan Africa	Low income		12987.3
RUS	185	Russian Federation	Former USSR	FALSE	Russian Federation	Europe & Central Asia	Upper middle income		145762
SCG	186	Serbia and Montenegro	OECD Europe	FALSE
KNA	188	Saint Kitts and Nevis	Central America	FALSE	St. Kitts and Nevis	Latin America & Caribbean	High income		47.681
LCA	189	Saint Lucia	Central America	FALSE	St. Lucia	Latin America & Caribbean	Upper middle income		178.922
VCT	191	Saint Vincent and the Grenadines	Central America	FALSE	St. Vincent and the Grenadines	Latin America & Caribbean	Upper middle income		104.712
STP	193	Sao Tome and Principe	Western Africa	FALSE	S‹o TomŽ and Pr’ncipe	Sub-Saharan Africa	Lower middle income		216.222
SAU	194	Saudi Arabia	Middle East	FALSE	Saudi Arabia	Middle East & North Africa	High income		36230
SEN	195	Senegal	Western Africa	FALSE	Senegal	Sub-Saharan Africa	Lower middle income		16215.5
SLE	197	Sierra Leone	Western Africa	FALSE	Sierra Leone	Sub-Saharan Africa	Low income		8140.21
SVN	198	Slovenia	Eastern Europe	TRUE	Slovenia	Europe & Central Asia	High income		2116.25
SVK	199	Slovakia	Eastern Europe	TRUE	Slovak Republic	Europe & Central Asia	High income		5457.55
SGP	200	Singapore	South East Asia	FALSE	Singapore	East Asia & Pacific	High income		5893.52
SOM	201	Somalia	Eastern Africa	FALSE	Somalia	Sub-Saharan Africa	Low income		16272.9
ZAF	202	South Africa	Southern Africa	FALSE	South Africa	Sub-Saharan Africa	Upper middle income		58466.1
ESP	203	Spain	OECD Europe	TRUE	Spain	Europe & Central Asia	High income		47330
SUR	207	Suriname	South America	FALSE	Suriname	Latin America & Caribbean	Upper middle income		603.805
TJK	208	Tajikistan	Former USSR	FALSE	Tajikistan	Europe & Central Asia	Lower middle income		9442.82
SWZ	209	Eswatini	Southern Africa	FALSE	Eswatini	Sub-Saharan Africa	Lower middle income		1174.22
SWE	210	Sweden	OECD Europe	TRUE	Sweden	Europe & Central Asia	High income		10321.4
CHE	211	Switzerland	OECD Europe	FALSE	Switzerland	Europe & Central Asia	High income		8606.43
SYR	212	Syrian Arab Republic	Middle East	FALSE	Syrian Arab Republic	Middle East & North Africa	Low income		20486
TKM	213	Turkmenistan	Former USSR	FALSE	Turkmenistan	Europe & Central Asia	Upper middle income		6204.37
TWN	214	China, Taiwan Province of	East Asia	FALSE	Taiwan, China	East Asia & Pacific	High income		23800.9
TZA	215	United Republic of Tanzania	Southern Africa	FALSE	Tanzania	Sub-Saharan Africa	Lower middle income		60772
THA	216	Thailand	South East Asia	FALSE	Thailand	East Asia & Pacific	Upper middle income		71389.4
TGO	217	Togo	Western Africa	FALSE	Togo	Sub-Saharan Africa	Low income		8342.24
TTO	220	Trinidad and Tobago	Central America	FALSE	Trinidad and Tobago	Latin America & Caribbean	High income		1513.9
OMN	221	Oman	Middle East	FALSE	Oman	Middle East & North Africa	High income		4589.14
TUN	222	Tunisia	Northern Africa	FALSE	Tunisia	Middle East & North Africa	Lower middle income		12106.3
TUR	223	Turkey	Middle East	FALSE	TŸrkiye	Europe & Central Asia	Upper middle income		83811.7
ARE	225	United Arab Emirates	Middle East	FALSE	United Arab Emirates	Middle East & North Africa	High income		9247.55
UGA	226	Uganda	Eastern Africa	FALSE	Uganda	Sub-Saharan Africa	Low income		43685.9
SUN	228	USSR	Former USSR	FALSE
GBR	229	United Kingdom	OECD Europe	FALSE	United Kingdom	Europe & Central Asia	High income		66951.2
UKR	230	Ukraine	Former USSR	FALSE	Ukraine	Europe & Central Asia	Lower middle income		44090.7
USA	231	United States of America	USA	FALSE	United States	North America	High income		335388
BFA	233	Burkina Faso	Western Africa	FALSE	Burkina Faso	Sub-Saharan Africa	Low income		21231.9
URY	234	Uruguay	South America	FALSE	Uruguay	Latin America & Caribbean	High income		3428.27
UZB	235	Uzbekistan	Former USSR	FALSE	Uzbekistan	Europe & Central Asia	Lower middle income		33243.5
VEN	236	Venezuela (Bolivarian Republic of)	South America	FALSE	Venezuela, RB	Latin America & Caribbean	Lower middle income		28628.8
VNM	237	Viet Nam	South East Asia	FALSE	Vietnam	East Asia & Pacific	Lower middle income		96203.6
ETH	238	Ethiopia	Eastern Africa	FALSE	Ethiopia	Sub-Saharan Africa	Low income		115638
WSM	244	Samoa	Oceania	FALSE	Samoa	East Asia & Pacific	Lower middle income		213.059
YUG	248	Yugoslav SFR	Eastern Europe	FALSE
YEM	249	Yemen	Middle East	FALSE	Yemen, Rep.	Middle East & North Africa	Low income		31927.1
COD	250	Democratic Republic of the Congo	Western Africa	FALSE	Congo, Dem. Rep.	Sub-Saharan Africa	Low income		91331.9
ZMB	251	Zambia	Southern Africa	FALSE	Zambia	Sub-Saharan Africa	Lower middle income		18654.9
BEL	255	Belgium	OECD Europe	TRUE	Belgium	Europe & Central Asia	High income		11541.3
LUX	256	Luxembourg	OECD Europe	TRUE	Luxembourg	Europe & Central Asia	High income		626.079
SRB	272	Serbia	OECD Europe	FALSE	Serbia	Europe & Central Asia	Upper middle income		7384.06
MNE	273	Montenegro	OECD Europe	FALSE	Montenegro	Europe & Central Asia	Upper middle income		629.89
SDN	276	Sudan	Eastern Africa	FALSE	Sudan	Sub-Saharan Africa	Low income		43828.1
SSD	277	South Sudan	Eastern Africa	FALSE	South Sudan	Sub-Saharan Africa	Low income		10545.4
ROW	999	RoW		FALSE

## Sheet: S2
EAT_diet_group	EAT_diet_item	EAT_diet_item_id	EAT_diet_interch_id	EAT_diet_anim_flag	Food_group	EAT-Lancet recommended amount		Moderate ASF diet	Low ASF diet	Zero ASF diet
						g/day	kcal/day	g/day	g/day	g/day
Whole grains	Rice, wheat, corn, and other	E001	I001	A001	Other foods	232	811	0	0	0
Tubers or starchy vegetables	Potatoes and cassava	E002	I002	A001	Other foods	50	39	0	0	0
Vegetables	All Vegetables	E003	I003	A001	Other foods	300	78	0	0	0
Fruits	All fruit	E004	I004	A001	Other foods	200	126	0	0	0
Dairy foods	Whole milk or derivative equivalents	E005	I005	A002	Animal protein	250	153	500	250	0
Protein sources	Beef and lamb	E006	I006	A002	Animal protein	7	15	14	7	0
Protein sources	Pork	E006	I006	A002	Animal protein	7	15	14	7	0
Protein sources	Chicken and other poultry	E008	I007	A002	Animal protein	29	62	58	29	0
Protein sources	Eggs	E009	I008	A002	Animal protein	13	19	25	13	0
Protein sources	Fish	E010	I009	A002	Animal protein	28	40	100	28	0
Protein sources	Legumes_Dry beans, lentils, and peas	E011	I010	A001	Plant protein	50	172	0	50	100
Protein sources	Legumes_Soy foods	E012	I010	A001	Plant protein	25	112	0	25	50
Protein sources	Legumes_Peanuts	E013	I010	A001	Plant protein	25	142	0	25	75
Protein sources	Tree Nuts	E014	I011	A001	Plant protein	25	149	0	25	50
Added fats	Palm oil	E015	I012	A001	Vegetable oil	6.8	60	0	6.8	6.8
Added fats	Unsaturated oils	E016	I013	A001	Vegetable oil	40	354	20	40	80
Added fats	Lard or tallow	E017	I014	A002	Animal fat	5	36	5	5	0
Added sugars	All sweeteners	E018	I015	A001	Other foods	31	120	0	0	0
References: Willett, W., Rockström, J., Loken, B., Springmann, M., Lang, T., Vermeulen, S., Garnett, T., Tilman, D., DeClerck, F., Wood, A., Jonell, M., Clark, M., Gordon, L. J., Fanzo, J., Hawkes, C., Zurayk, R., Rivera, J. A., De Vries, W., Majele Sibanda, L., … Murray, C. J. L. (2019). Food in the Anthropocene: the EAT-Lancet Commission on healthy diets from sustainable food systems. The Lance…

## Sheet: S3
comm_code	item_code	item	comm_group	unit	EAT_diet_group	EAT_diet_item	EAT_diet_item_id	EAT_diet_interch_id	EAT_diet_anim_flag	group_descri	report_food_group
c001	2807	Rice and products	Cereals	tonnes	Whole grains	Rice, wheat, corn, and other	E001	I001	A001	Other foods	Cereal
c002	2511	Wheat and products	Cereals	tonnes	Whole grains	Rice, wheat, corn, and other	E001	I001	A001	Other foods	Cereal
c003	2513	Barley and products	Cereals	tonnes	Whole grains	Rice, wheat, corn, and other	E001	I001	A001	Other foods	Cereal
c004	2514	Maize and products	Cereals	tonnes	Whole grains	Rice, wheat, corn, and other	E001	I001	A001	Other foods	Cereal
c005	2515	Rye and products	Cereals	tonnes	Whole grains	Rice, wheat, corn, and other	E001	I001	A001	Other foods	Cereal
c006	2516	Oats	Cereals	tonnes	Whole grains	Rice, wheat, corn, and other	E001	I001	A001	Other foods	Cereal
c007	2517	Millet and products	Cereals	tonnes	Whole grains	Rice, wheat, corn, and other	E001	I001	A001	Other foods	Cereal
c008	2518	Sorghum and products	Cereals	tonnes	Whole grains	Rice, wheat, corn, and other	E001	I001	A001	Other foods	Cereal
c009	2520	Cereals, Other	Cereals	tonnes	Whole grains	Rice, wheat, corn, and other	E001	I001	A001	Other foods	Cereal
c010	2531	Potatoes and products	Roots and tubers	tonnes	Tubers or starchy vegetables	Potatoes and cassava	E002	I002	A001	Other foods	Fruit and vegetables
c011	2532	Cassava and products	Roots and tubers	tonnes	Tubers or starchy vegetables	Potatoes and cassava	E002	I002	A001	Other foods	Fruit and vegetables
c012	2533	Sweet potatoes	Roots and tubers	tonnes	Tubers or starchy vegetables	Potatoes and cassava	E002	I002	A001	Other foods	Fruit and vegetables
c013	2534	Roots, Other	Roots and tubers	tonnes	Tubers or starchy vegetables	Potatoes and cassava	E002	I002	A001	Other foods	Fruit and vegetables
c014	2535	Yams	Roots and tubers	tonnes	Tubers or starchy vegetables	Potatoes and cassava	E002	I002	A001	Other foods	Fruit and vegetables
c015	2536	Sugar cane	Sugar crops	tonnes	Added sugars	All sweeteners	E018	I015	A001	Other foods	Sweeteners
c016	2537	Sugar beet	Sugar crops	tonnes	Added sugars	All sweeteners	E018	I015	A001	Other foods	Sweeteners
c017	2546	Beans	Vegetables, fruit, nuts, pulses, spices	tonnes	Protein sources	Legumes_Dry beans, lentils, and peas	E011	I010	A001	Plant protein	Legumes
c018	2547	Peas	Vegetables, fruit, nuts, pulses, spices	tonnes	Protein sources	Legumes_Dry beans, lentils, and peas	E011	I010	A001	Plant protein	Legumes
c019	2549	Pulses, Other and products	Vegetables, fruit, nuts, pulses, spices	tonnes	Protein sources	Legumes_Dry beans, lentils, and peas	E011	I010	A001	Plant protein	Legumes
c020	2551	Nuts and products	Vegetables, fruit, nuts, pulses, spices	tonnes	Protein sources	Tree Nuts	E014	I011	A001	Plant protein	Nuts and seeds
c021	2555	Soyabeans	Oil crops	tonnes	Protein sources	Legumes_Soy foods	E012	I010	A001	Plant protein	Legumes
c022	2552	Groundnuts	Oil crops	tonnes	Protein sources	Legumes_Peanuts	E013	I010	A001	Plant protein	Legumes
c023	2557	Sunflower seed	Oil crops	tonnes	Protein sources	Tree Nuts	E014	I011	A001	Plant protein	Nuts and seeds
c024	2558	Rape and Mustardseed	Oil crops	tonnes							Vegetable oils
c025	328	Seed cotton	Oil crops	tonnes							Other
c026	2560	Coconuts - Incl Copra	Oil crops	tonnes	Protein sources	Tree Nuts	E014	I011	A001	Plant protein	Nuts and seeds
c027	2561	Sesame seed	Oil crops	tonnes	Protein sources	Tree Nuts	E014	I011	A001	Plant protein	Nuts and seeds
c028	254	Oil, palm fruit	Oil crops	tonnes							Vegetable oils
c029	2563	Olives (including preserved)	Oil crops	tonnes							Vegetable oils
c030	2570	Oilcrops, Other	Oil crops	tonnes	Protein sources	Tree Nuts	E014	I011	A001	Plant protein	Vegetable oils
c031	2601	Tomatoes and products	Vegetables, fruit, nuts, pulses, spices	tonnes	Vegetables	All Vegetables	E003	I003	A001	Other foods	Fruit and vegetables
c032	2602	Onions	Vegetables, fruit, nuts, pulses, spices	tonnes	Vegetables	All Vegetables	E003	I003	A001	Other foods	Fruit and vegetables
c033	2605	Vegetables, Other	Vegetables, fruit, nuts, pulses, spices	tonnes	Vegetables	All Vegetables	E003	I003	A001	Other foods	Fruit and vegetables
c034	2611	Oranges, Mandarines	Vegetables, fruit, nuts, pulses, spices	tonnes	Fruits	All fruit	E004	I004	A001	Other foods	Fruit and vegetables
c035	2612	Lemons, Limes and products	Vegetables, fruit, nuts, pulses, spices	tonnes	Fruits	All fruit	E004	I004	A001	Other foods	Fruit and vegetables
c036	2613	Grapefruit and products	Vegetables, fruit, nuts, pulses, spices	tonnes	Fruits	All fruit	E004	I004	A001	Other foods	Fruit and vegetables
c037	2614	Citrus, Other	Vegetables, fruit, nuts, pulses, spices	tonnes	Fruits	All fruit	E004	I004	A001	Other foods	Fruit and vegetables
c038	2615	Bananas	Vegetables, fruit, nuts, pulses, spices	tonnes	Fruits	All fruit	E004	I004	A001	Other foods	Fruit and vegetables
c039	2616	Plantains	Vegetables, fruit, nuts, pulses, spices	tonnes	Fruits	All fruit	E004	I004	A001	Other foods	Fruit and vegetables
c040	2617	Apples and products	Vegetables, fruit, nuts, pulses, spices	tonnes	Fruits	All fruit	E004	I004	A001	Other foods	Fruit and vegetables
c041	2618	Pineapples and products	Vegetables, fruit, nuts, pulses, spices	tonnes	Fruits	All fruit	E004	I004	A001	Other foods	Fruit and vegetables
c042	2619	Dates	Vegetables, fruit, nuts, pulses, spices	tonnes	Fruits	All fruit	E004	I004	A001	Other foods	Fruit and vegetables
c043	2620	Grapes and products (excl wine)	Vegetables, fruit, nuts, pulses, spices	tonnes	Fruits	All fruit	E004	I004	A001	Other foods	Fruit and vegetables
c044	2625	Fruits, Other	Vegetables, fruit, nuts, pulses, spices	tonnes	Fruits	All fruit	E004	I004	A001	Other foods	Fruit and vegetables
c045	2630	Coffee and products	Coffee, tea, cocoa	tonnes							Other
c046	2633	Cocoa Beans and products	Coffee, tea, cocoa	tonnes							Other
c047	2635	Tea (including mate)	Coffee, tea, cocoa	tonnes							Other
c048	677	Hops	Vegetables, fruit, nuts, pulses, spices	tonnes							Fruit and vegetables
c049	2640	Pepper	Vegetables, fruit, nuts, pulses, spices	tonnes	Vegetables	All Vegetables	E003	I003	A001	Other foods	Fruit and vegetables
c050	2641	Pimento	Vegetables, fruit, nuts, pulses, spices	tonnes	Vegetables	All Vegetables	E003	I003	A001	Other foods	Fruit and vegetables
c051	2642	Cloves	Vegetables, fruit, nuts, pulses, spices	tonnes	Vegetables	All Vegetables	E003	I003	A001	Other foods	Fruit and vegetables
c052	2645	Spices, Other	Vegetables, fruit, nuts, pulses, spices	tonnes	Vegetables	All Vegetables	E003	I003	A001	Other foods	Fruit and vegetables
c053	2662	Jute	Fibre crops	tonnes							Other
c054	2663	Jute-Like Fibres	Fibre crops	tonnes							Other
c055	2664	Soft-Fibres, Other	Fibre crops	tonnes							Other
c056	2665	Sisal	Fibre crops	tonnes							Other
c057	2666	Abaca	Fibre crops	tonnes							Other
c058	2667	Hard Fibres, Other	Fibre crops	tonnes							Other
c059	2671	Tobacco	Tobacco, rubber	tonnes							Other
c060	2672	Rubber	Tobacco, rubber	tonnes							Other
c061	2000	Fodder crops	Fodder crops	tonnes							Other
c062	2001	Grazing	Grazing	tonnes							Other
c063	2559	Cottonseed	Fibre crops	tonnes							Other
c064	2562	Palm kernels	Oil crops	tonnes							Vegetable oils
c065	2541	Sugar non-centrifugal	Sugar, sweeteners	tonnes	Added sugars	All sweeteners	E018	I015	A001	Other foods	Sweeteners
c066	2542	Sugar (Raw Equivalent)	Sugar, sweeteners	tonnes	Added sugars	All sweeteners	E018	I015	A001	Other foods	Sweeteners
c067	2543	Sweeteners, Other	Sugar, sweeteners	tonnes	Added sugars	All sweeteners	E018	I015	A001	Other foods	Sweeteners
c068	2571	Soyabean Oil	Vegetable oils	tonnes	Added fats	Unsaturated oils	E016	I013	A001	Vegatable oil	Vegetable oils
c069	2572	Groundnut Oil	Vegetable oils	tonnes	Added fats	Unsaturated oils	E016	I013	A001	Vegatable oil	Vegetable oils
c070	2573	Sunflowerseed Oil	Vegetable oils	tonnes	Added fats	Unsaturated oils	E016	I013	A001	Vegatable oil	Vegetable oils
c071	2574	Rape and Mustard Oil	Vegetable oils	tonnes	Added fats	Unsaturated oils	E016	I013	A001	Vegatable oil	Vegetable oils
c072	2575	Cottonseed Oil	Vegetable oils	tonnes	Added fats	Unsaturated oils	E016	I013	A001	Vegatable oil	Vegetable oils
c073	2576	Palmkernel Oil	Vegetable oils	tonnes	Added fats	Unsaturated oils	E016	I013	A001	Vegatable oil	Vegetable oils
c074	2577	Palm Oil	Vegetable oils	tonnes	Added fats	Palm oil	E015	I012	A001	Vegatable oil	Vegetable oils
c075	2578	Coconut Oil	Vegetable oils	tonnes	Added fats	Unsaturated oils	E016	I013	A001	Vegatable oil	Vegetable oils
c076	2579	Sesameseed Oil	Vegetable oils	tonnes	Added fats	Unsaturated oils	E016	I013	A001	Vegatable oil	Vegetable oils
c077	2580	Olive Oil	Vegetable oils	tonnes	Added fats	Unsaturated oils	E016	I013	A001	Vegatable oil	Vegetable oils
c078	2581	Ricebran Oil	Vegetable oils	tonnes	Added fats	Unsaturated oils	E016	I013	A001	Vegatable oil	Vegetable oils
c079	2582	Maize Germ Oil	Vegetable oils	tonnes	Added fats	Unsaturated oils	E016	I013	A001	Vegatable oil	Vegetable oils
c080	2586	Oilcrops Oil, Other	Vegetable oils	tonnes	Added fats	Unsaturated oils	E016	I013	A001	Vegatable oil	Vegetable oils
c081	2590	Soyabean Cake	Oil cakes	tonnes							Other
c082	2591	Groundnut Cake	Oil cakes	tonnes							Other
c083	2592	Sunflowerseed Cake	Oil cakes	tonnes							Other
c084	2593	Rape and Mustard Cake	Oil cakes	tonnes							Other
c085	2594	Cottonseed Cake	Oil cakes	tonnes							Other
c086	2595	Palmkernel Cake	Oil cakes	tonnes							Other
c087	2596	Copra Cake	Oil cakes	tonnes							Other
c088	2597	Sesameseed Cake	Oil cakes	tonnes							Other
c089	2598	Oilseed Cakes, Other	Oil cakes	tonnes							Other
c090	2655	Wine	Alcohol	tonnes							Alcohol
c091	2656	Beer	Alcohol	tonnes							Alcohol
c092	2657	Beverages, Fermented	Alcohol	tonnes							Alcohol
c093	2658	Beverages, Alcoholic	Alcohol	tonnes							Alcohol
c094	2659	Alcohol, Non-Food	Ethanol	tonnes							Other
c095	2661	Cotton lint	Fibre crops	tonnes							Other
c096	866	Cattle	Live animals	1000 Head							Other
c097	946	Buffaloes	Live animals	1000 Head							Other
c098	976	Sheep	Live animals	1000 Head							Other
c099	1016	Goats	Live animals	1000 Head							Other
c100	1034	Pigs	Live animals	1000 Head							Other
c101	2029	Poultry Birds	Live animals	1000 Head							Other
c102	1096	Horses	Live animals	1000 Head							Other
c103	1107	Asses	Live animals	1000 Head							Other
c104	1110	Mules	Live animals	1000 Head							Other
c105	1126	Camels	Live animals	1000 Head							Other
c106	1157	Camelids, other	Live animals	1000 Head							Other
c107	1140	Rabbits and hares	Live animals	1000 Head							Other
c108	1150	Rodents, other	Live animals	1000 Head							Other
c109	2848	Milk - Excluding Butter	Milk	tonnes	Dairy foods	Whole milk or derivative equivalents	E005	I005	A002	Animal protein	Dairy
c110	2740	Butter, Ghee	Milk	tonnes	Dairy foods	Whole milk or derivative equivalents	E005	I005	A002	Animal protein	Dairy
c111	2744	Eggs	Eggs	tonnes	Protein sources	Eggs	E009	I008	A002	Animal protein	Eggs
c112	2746	Wool (Clean Eq.)	Hides, skins, wool	tonnes							Other ASF
c113	2731	Bovine Meat	Meat	tonnes	Protein sources	Beef and lamb	E006	I006	A002	Animal protein	Beef and lamb
c114	2732	Mutton & Goat Meat	Meat	tonnes	Protein sources	Beef and lamb	E006	I006	A002	Animal protein	Beef and lamb
c115	2733	Pigmeat	Meat	tonnes	Protein sources	Pork	E006	I006	A002	Animal protein	Pork
c116	2734	Poultry Meat	Meat	tonnes	Protein sources	Chicken and other poultry	E008	I007	A002	Animal protein	Poultry meat
c117	2735	Meat, Other	Meat	tonnes	Protein sources	Beef and lamb	E006	I006	A002	Animal protein	Other ASF
c118	2736	Offals, Edible	Meat	tonnes	Protein sources	Beef and lamb	E006	I006	A002	Animal protein	Other ASF
c119	2737	Fats, Animals, Raw	Animal fats	tonnes	Added fats	Lard or tallow	E017	I014	A002	Animal fat	Lard or tallow
c120	2748	Hides and skins	Hides, skins, wool	tonnes							Other ASF
c121	2745	Honey	Honey	tonnes	Added sugars	All sweeteners	E018	I015	A001	Other foods	Sweeteners
c122	2747	Silk	Hides, skins, wool	tonnes							Other ASF
c123	2960	Fish, Seafood	Fish	tonnes	Protein sources	Fish	E010	I009	A002	Animal protein	Fish

## Sheet: S4
iso3c	comm_code	item_code	item	comm_group	unit	energy_content (kcal/g)	eat_ratio (1- food waste ratio)
ATG	c001	2807	Rice and products	Cereals	tonnes	3.63968	0.864
ATG	c002	2511	Wheat and products	Cereals	tonnes	2.19649	0.864
ATG	c003	2513	Barley and products	Cereals	tonnes	1.20842	0.75504
ATG	c004	2514	Maize and products	Cereals	tonnes	2.25972	0.864
ATG	c005	2515	Rye and products	Cereals	tonnes	2.57538	0.744989
ATG	c006	2516	Oats	Cereals	tonnes	2.08228	0.864
ATG	c007	2517	Millet and products	Cereals	tonnes	3.40921	0.774533
ATG	c008	2518	Sorghum and products	Cereals	tonnes	1.89055	0.758533
ATG	c009	2520	Cereals, Other	Cereals	tonnes	2.35193	0.864
ATG	c010	2531	Potatoes and products	Roots and tubers	tonnes	0.537591	0.94672
ATG	c011	2532	Cassava and products	Roots and tubers	tonnes	1.01385	0.94672
ATG	c013	2534	Roots, Other	Roots and tubers	tonnes	0.963559	0.94672
ATG	c014	2535	Yams	Roots and tubers	tonnes	0.90566	0.94672
ATG	c012	2533	Sweet potatoes	Roots and tubers	tonnes	0.939046	0.94672
ATG	c031	2601	Tomatoes and products	Vegetables, fruit, nuts, pulses, spices	tonnes	0.0920802	0.8811
ATG	c032	2602	Onions	Vegetables, fruit, nuts, pulses, spices	tonnes	0.370477	0.8811
ATG	c033	2605	Vegetables, Other	Vegetables, fruit, nuts, pulses, spices	tonnes	0.151341	0.8811
ATG	c049	2640	Pepper	Vegetables, fruit, nuts, pulses, spices	tonnes	2.67548	0.8811
ATG	c050	2641	Pimento	Vegetables, fruit, nuts, pulses, spices	tonnes	2.82459	0.803525
ATG	c051	2642	Cloves	Vegetables, fruit, nuts, pulses, spices	tonnes	2.29486	0.824048
ATG	c052	2645	Spices, Other	Vegetables, fruit, nuts, pulses, spices	tonnes	2.31812	0.8811
ATG	c034	2611	Oranges, Mandarines	Vegetables, fruit, nuts, pulses, spices	tonnes	0.141969	0.8811
ATG	c035	2612	Lemons, Limes and products	Vegetables, fruit, nuts, pulses, spices	tonnes	0.239694	0.8811
ATG	c036	2613	Grapefruit and products	Vegetables, fruit, nuts, pulses, spices	tonnes	0.219877	0.8811
ATG	c037	2614	Citrus, Other	Vegetables, fruit, nuts, pulses, spices	tonnes	0.729233	0.8811
ATG	c038	2615	Bananas	Vegetables, fruit, nuts, pulses, spices	tonnes	0.595413	0.8811
ATG	c039	2616	Plantains	Vegetables, fruit, nuts, pulses, spices	tonnes	0.740604	0.807976
ATG	c040	2617	Apples and products	Vegetables, fruit, nuts, pulses, spices	tonnes	0.356945	0.8811
ATG	c041	2618	Pineapples and products	Vegetables, fruit, nuts, pulses, spices	tonnes	0.0837893	0.8811
ATG	c042	2619	Dates	Vegetables, fruit, nuts, pulses, spices	tonnes	1.83727	0.804114
ATG	c043	2620	Grapes and products (excl wine)	Vegetables, fruit, nuts, pulses, spices	tonnes	0.652577	0.8811
ATG	c044	2625	Fruits, Other	Vegetables, fruit, nuts, pulses, spices	tonnes	0.448972	0.8811
ATG	c109	2848	Milk - Excluding Butter	Milk	tonnes	1.156	0.8832
ATG	c110	2740	Butter, Ghee	Milk	tonnes	7.39982	0.8832
ATG	c113	2731	Bovine Meat	Meat	tonnes	0.938963	0.893
ATG	c114	2732	Mutton & Goat Meat	Meat	tonnes	2.09686	0.893
ATG	c115	2733	Pigmeat	Meat	tonnes	1.35781	0.893
ATG	c017	2546	Beans	Vegetables, fruit, nuts, pulses, spices	tonnes	3.10254	0.9604
ATG	c018	2547	Peas	Vegetables, fruit, nuts, pulses, spices	tonnes	2.54484	0.9604
ATG	c019	2549	Pulses, Other and products	Vegetables, fruit, nuts, pulses, spices	tonnes	3.35803	0.9604
ATG	c020	2551	Nuts and products	Vegetables, fruit, nuts, pulses, spices	tonnes	1.12838	0.9604
ATG	c021	2555	Soyabeans	Oil crops	tonnes	3.91378	0.9604
ATG	c022	2552	Groundnuts	Oil crops	tonnes	2.31295	0.9604
ATG	c023	2557	Sunflower seed	Oil crops	tonnes	4.42939	0.954313
ATG	c026	2560	Coconuts - Incl Copra	Oil crops	tonnes	0.979304	0.9604
ATG	c027	2561	Sesame seed	Oil crops	tonnes	5.74824	0.9529
ATG	c030	2570	Oilcrops, Other	Oil crops	tonnes	2.84212	0.952139
ATG	c111	2744	Eggs	Eggs	tonnes	0.719534	0.9216
ATG	c116	2734	Poultry Meat	Meat	tonnes	1.40358	0.893
ATG	c123	2960	Fish, Seafood	Fish	tonnes	0.644966	0.8908
ATG	c074	2577	Palm Oil	Vegetable oils	tonnes	6.30756	0.954844
ATG	c068	2571	Soyabean Oil	Vegetable oils	tonnes	7.25028	0.9604
ATG	c069	2572	Groundnut Oil	Vegetable oils	tonnes	8.52514	0.9604
ATG	c070	2573	Sunflowerseed Oil	Vegetable oils	tonnes	6.72404	0.9526
ATG	c071	2574	Rape and Mustard Oil	Vegetable oils	tonnes	6.42825	0.952013
ATG	c072	2575	Cottonseed Oil	Vegetable oils	tonnes	8.70352	0.9604
ATG	c073	2576	Palmkernel Oil	Vegetable oils	tonnes	8.36406	0.954844
ATG	c075	2578	Coconut Oil	Vegetable oils	tonnes	6.18122	0.9604
ATG	c076	2579	Sesameseed Oil	Vegetable oils	tonnes	8.49291	0.95343
ATG	c077	2580	Olive Oil	Vegetable oils	tonnes	8.82535	0.9604
ATG	c078	2581	Ricebran Oil	Vegetable oils	tonnes	6.50714	0.9504
ATG	c079	2582	Maize Germ Oil	Vegetable oils	tonnes	8.82683	0.9604
ATG	c080	2586	Oilcrops Oil, Other	Vegetable oils	tonnes	4.33009	0.9604
ATG	c119	2737	Fats, Animals, Raw	Animal fats	tonnes	6.15674	0.893
ATG	c015	2536	Sugar cane	Sugar crops	tonnes	0.304086	1
ATG	c016	2537	Sugar beet	Sugar crops	tonnes	0.558859	1
ATG	c065	2541	Sugar non-centrifugal	Sugar, sweeteners	tonnes	4.41786	0.94335
ATG	c066	2542	Sugar (Raw Equivalent)	Sugar, sweeteners	tonnes	3.80247	0.94335
ATG	c067	2543	Sweeteners, Other	Sugar, sweeteners	tonnes	0.364092	0.94335
ATG	c121	2745	Honey	Honey	tonnes	3.25138	0.94335
ATG	c045	2630	Coffee and products	Coffee, tea, cocoa	tonnes	0.315492	1
ATG	c046	2633	Cocoa Beans and products	Coffee, tea, cocoa	tonnes	6.53708	1
ATG	c047	2635	Tea (including mate)	Coffee, tea, cocoa	tonnes	0.12218	1
ATG	c090	2655	Wine	Alcohol	tonnes	0.535157	1
ATG	c091	2656	Beer	Alcohol	tonnes	0.439105	1
ATG	c092	2657	Beverages, Fermented	Alcohol	tonnes	0.682807	1
ATG	c093	2658	Beverages, Alcoholic	Alcohol	tonnes	2.28094	1
ATG	c117	2735	Meat, Other	Meat	tonnes	1.52725	0.893
ATG	c118	2736	Offals, Edible	Meat	tonnes	1.298	0.893
ATG	c024	2558	Rape and Mustardseed	Oil crops	tonnes	1.20196	0.951511
ATG	c025	328	Seed cotton	Oil crops	tonnes		1
ATG	c028	254	Oil, palm fruit	Oil crops	tonnes		1
ATG	c029	2563	Olives (including preserved)	Oil crops	tonnes	0.777446	0.952664
ATG	c048	677	Hops	Vegetables, fruit, nuts, pulses, spices	tonnes		1
ATG	c053	2662	Jute	Fibre crops	tonnes		1
ATG	c054	2663	Jute-Like Fibres	Fibre crops	tonnes		1
ATG	c055	2664	Soft-Fibres, Other	Fibre crops	tonnes		1
ATG	c056	2665	Sisal	Fibre crops	tonnes		1
ATG	c057	2666	Abaca	Fibre crops	tonnes		1
ATG	c058	2667	Hard Fibres, Other	Fibre crops	tonnes		1
ATG	c059	2671	Tobacco	Tobacco, rubber	tonnes		1
ATG	c060	2672	Rubber	Tobacco, rubber	tonnes		1
ATG	c061	2000	Fodder crops	Fodder crops	tonnes		1
ATG	c062	2001	Grazing	Grazing	tonnes		1
ATG	c063	2559	Cottonseed	Fibre crops	tonnes	4.90679	1
ATG	c064	2562	Palm kernels	Oil crops	tonnes		1
ATG	c081	2590	Soyabean Cake	Oil cakes	tonnes		1
ATG	c082	2591	Groundnut Cake	Oil cakes	tonnes		1
ATG	c083	2592	Sunflowerseed Cake	Oil cakes	tonnes		1
ATG	c084	2593	Rape and Mustard Cake	Oil cakes	tonnes		1
ATG	c085	2594	Cottonseed Cake	Oil cakes	tonnes		1
ATG	c086	2595	Palmkernel Cake	Oil cakes	tonnes		1
ATG	c087	2596	Copra Cake	Oil cakes	tonnes		1
ATG	c088	2597	Sesameseed Cake	Oil cakes	tonnes		1
ATG	c089	2598	Oilseed Cakes, Other	Oil cakes	tonnes		1
ATG	c094	2659	Alcohol, Non-Food	Ethanol	tonnes		1
ATG	c095	2661	Cotton lint	Fibre crops	tonnes		1
ATG	c096	866	Cattle	Live animals	1000 Head		1
ATG	c097	946	Buffaloes	Live animals	1000 Head		1
ATG	c098	976	Sheep	Live animals	1000 Head		1
ATG	c099	1016	Goats	Live animals	1000 Head		1
ATG	c100	1034	Pigs	Live animals	1000 Head		1
ATG	c101	2029	Poultry Birds	Live animals	1000 Head		1
ATG	c102	1096	Horses	Live animals	1000 Head		1
ATG	c103	1107	Asses	Live animals	1000 Head		1
ATG	c104	1110	Mules	Live animals	1000 Head		1
ATG	c105	1126	Camels	Live animals	1000 Head		1
ATG	c106	1157	Camelids, other	Live animals	1000 Head		1
ATG	c107	1140	Rabbits and hares	Live animals	1000 Head		1
ATG	c108	1150	Rodents, other	Live animals	1000 Head		1
ATG	c112	2746	Wool (Clean Eq.)	Hides, skins, wool	tonnes		1
ATG	c120	2748	Hides and skins	Hides, skins, wool	tonnes		1
ATG	c122	2747	Silk	Hides, skins, wool	tonnes		1
AUS	c001	2807	Rice and products	Cereals	tonnes	2.15703	0.7154
AUS	c002	2511	Wheat and products	Cereals	tonnes	2.31684	0.7154
AUS	c003	2513	Barley and products	Cereals	tonnes	1.20842	0.75504
AUS	c004	2514	Maize and products	Cereals	tonnes	2.73596	0.7154
AUS	c005	2515	Rye and products	Cereals	tonnes	1.86473	0.7154
AUS	c006	2516	Oats	Cereals	tonnes	2.07681	0.7154
AUS	c007	2517	Millet and products	Cereals	tonnes	3.40921	0.774533
AUS	c008	2518	Sorghum and products	Cereals	tonnes	4.66181	0.7154
AUS	c009	2520	Cereals, Other	Cereals	tonnes	3.42759	0.7154
AUS	c010	2531	Potatoes and products	Roots and tubers	tonnes	0.573779	0.798898
AUS	c011	2532	Cassava and products	Roots and tubers	tonnes	3.77796	0.798898
AUS	c013	2534	Roots, Other	Roots and tubers	tonnes	0.932673	0.798898
AUS	c014	2535	Yams	Roots and tubers	tonnes	0.559418	0.881852
AUS	c012	2533	Sweet potatoes	Roots and tubers	tonnes	0.971712	0.798898
AUS	c031	2601	Tomatoes and products	Vegetables, fruit, nuts, pulses, spices	tonnes	0.118234	0.78264
AUS	c032	2602	Onions	Vegetables, fruit, nuts, pulses, spices	tonnes	0.388904	0.78264
AUS	c033	2605	Vegetables, Other	Vegetables, fruit, nuts, pulses, spices	tonnes	0.258033	0.78264
AUS	c049	2640	Pepper	Vegetables, fruit, nuts, pulses, spices	tonnes	2.84513	0.78264
AUS	c050	2641	Pimento	Vegetables, fruit, nuts, pulses, spices	tonnes	2.98237	0.78264
AUS	c051	2642	Cloves	Vegetables, fruit, nuts, pulses, spices	tonnes	2.29486	0.824048
AUS	c052	2645	Spices, Other	Vegetables, fruit, nuts, pulses, spices	tonnes	3.17938	0.78264
AUS	c034	2611	Oranges, Mandarines	Vegetables, fruit, nuts, pulses, spices	tonnes	0.236948	0.78264
AUS	c035	2612	Lemons, Limes and products	Vegetables, fruit, nuts, pulses, spices	tonnes	0.188783	0.78264
AUS	c036	2613	Grapefruit and products	Vegetables, fruit, nuts, pulses, spices	tonnes	0.186473	0.78264
AUS	c037	2614	Citrus, Other	Vegetables, fruit, nuts, pulses, spices	tonnes	0.815817	0.78264
AUS	c038	2615	Bananas	Vegetables, fruit, nuts, pulses, spices	tonnes	0.630667	0.78264
AUS	c039	2616	Plantains	Vegetables, fruit, nuts, pulses, spices	tonnes	0.740604	0.807976
AUS	c040	2617	Apples and products	Vegetables, fruit, nuts, pulses, spices	tonnes	0.310979	0.78264
AUS	c041	2618	Pineapples and products	Vegetables, fruit, nuts, pulses, spices	tonnes	0.152698	0.78264
AUS	c042	2619	Dates	Vegetables, fruit, nuts, pulses, spices	tonnes	2.12139	0.78264
AUS	c043	2620	Grapes and products (excl wine)	Vegetables, fruit, nuts, pulses, spices	tonnes	0.548284	0.78264
AUS	c044	2625	Fruits, Other	Vegetables, fruit, nuts, pulses, spices	tonnes	0.662916	0.78264
AUS	c109	2848	Milk - Excluding Butter	Milk	tonnes	0.610041	0.84575
AUS	c110	2740	Butter, Ghee	Milk	tonnes	7.46275	0.84575
AUS	c113	2731	Bovine Meat	Meat	tonnes	1.35005	0.8544
AUS	c114	2732	Mutton & Goat Meat	Meat	tonnes	2.19917	0.8544
AUS	c115	2733	Pigmeat	Meat	tonnes	1.49329	0.8544
AUS	c017	2546	Beans	Vegetables, fruit, nuts, pulses, spices	tonnes	3.14798	0.953092
AUS	c018	2547	Peas	Vegetables, fruit, nuts, pulses, spices	tonnes	2.97676	0.9504
AUS	c019	2549	Pulses, Other and products	Vegetables, fruit, nuts, pulses, spices	tonnes	3.53016	0.9504
AUS	c020	2551	Nuts and products	Vegetables, fruit, nuts, pulses, spices	tonnes	3.66224	0.9504
AUS	c021	2555	Soyabeans	Oil crops	tonnes	2.26913	0.9504
AUS	c022	2552	Groundnuts	Oil crops	tonnes	3.9558	0.9504
AUS	c023	2557	Sunflower seed	Oil crops	tonnes	4.42939	0.954313
AUS	c026	2560	Coconuts - Incl Copra	Oil crops	tonnes	1.12366	0.9504
AUS	c027	2561	Sesame seed	Oil crops	tonnes	5.74824	0.9529
AUS	c030	2570	Oilcrops, Other	Oil crops	tonnes	2.84212	0.952139
AUS	c111	2744	Eggs	Eggs	tonnes	1.26858	0.833
AUS	c116	2734	Poultry Meat	Meat	tonnes	1.3737	0.8544
AUS	c123	2960	Fish, Seafood	Fish	tonnes	0.592341	0.845188
AUS	c074	2577	Palm Oil	Vegetable oils	tonnes	6.06786	0.9504
AUS	c068	2571	Soyabean Oil	Vegetable oils	tonnes	3.42166	0.9504
AUS	c069	2572	Groundnut Oil	Vegetable oils	tonnes	12.0516	0.9504
AUS	c070	2573	Sunflowerseed Oil	Vegetable oils	tonnes	1.74677	0.9504
AUS	c071	2574	Rape and Mustard Oil	Vegetable oils	tonnes	7.50742	0.9504
AUS	c072	2575	Cottonseed Oil	Vegetable oils	tonnes	8.9561	0.9504
AUS	c073	2576	Palmkernel Oil	Vegetable oils	tonnes	8.36406	0.954844
AUS	c075	2578	Coconut Oil	Vegetable oils	tonnes	1.70368	0.9544
AUS	c076	2579	Sesameseed Oil	Vegetable oils	tonnes	9.58469	0.9504
AUS	c077	2580	Olive Oil	Vegetable oils	tonnes	8.98759	0.9504
AUS	c078	2581	Ricebran Oil	Vegetable oils	tonnes	6.50714	0.9504
AUS	c079	2582	Maize Germ Oil	Vegetable oils	tonnes	8.14535	0.9504
AUS	c080	2586	Oilcrops Oil, Other	Vegetable oils	tonnes	8.01841	0.9504
AUS	c119	2737	Fats, Animals, Raw	Animal fats	tonnes	1.48503	0.8544
AUS	c015	2536	Sugar cane	Sugar crops	tonnes	0.304086	1
AUS	c016	2537	Sugar beet	Sugar crops	tonnes	0.558859	1
AUS	c065	2541	Sugar non-centrifugal	Sugar, sweeteners	tonnes	4.41786	0.94335
AUS	c066	2542	Sugar (Raw Equivalent)	Sugar, sweeteners	tonnes	2.6444	0.94335
AUS	c067	2543	Sweeteners, Other	Sugar, sweeteners	tonnes	0.3294	0.94335
AUS	c121	2745	Honey	Honey	tonnes	3.31366	0.94335
AUS	c045	2630	Coffee and products	Coffee, tea, cocoa	tonnes	0.367536	1
AUS	c046	2633	Cocoa Beans and products	Coffee, tea, cocoa	tonnes	3.19023	1
AUS	c047	2635	Tea (including mate)	Coffee, tea, cocoa	tonnes	0.14344	1
AUS	c090	2655	Wine	Alcohol	tonnes	0.79187	1
AUS	c091	2656	Beer	Alcohol	tonnes	0.437969	1
AUS	c092	2657	Beverages, Fermented	Alcohol	tonnes	0.539102	1
AUS	c093	2658	Beverages, Alcoholic	Alcohol	tonnes	2.81713	1
AUS	c117	2735	Meat, Other	Meat	tonnes	1.13282	0.8544
AUS	c118	2736	Offals, Edible	Meat	tonnes	1.22304	0.8544
AUS	c024	2558	Rape and Mustardseed	Oil crops	tonnes	0.719354	0.951511
AUS	c025	328	Seed cotton	Oil crops	tonnes		1
AUS	c028	254	Oil, palm fruit	Oil crops	tonnes		1
AUS	c029	2563	Olives (including preserved)	Oil crops	tonnes	0.391293	0.9504
AUS	c048	677	Hops	Vegetables, fruit, nuts, pulses, spices	tonnes		1
AUS	c053	2662	Jute	Fibre crops	tonnes		1
AUS	c054	2663	Jute-Like Fibres	Fibre crops	tonnes		1
AUS	c055	2664	Soft-Fibres, Other	Fibre crops	tonnes		1
AUS	c056	2665	Sisal	Fibre crops	tonnes		1
AUS	c057	2666	Abaca	Fibre crops	tonnes		1
AUS	c058	2667	Hard Fibres, Other	Fibre crops	tonnes		1
AUS	c059	2671	Tobacco	Tobacco, rubber	tonnes		1
AUS	c060	2672	Rubber	Tobacco, rubber	tonnes		1
AUS	c061	2000	Fodder crops	Fodder crops	tonnes		1
AUS	c062	2001	Grazing	Grazing	tonnes		1
AUS	c063	2559	Cottonseed	Fibre crops	tonnes	4.90679	1
AUS	c064	2562	Palm kernels	Oil crops	tonnes		1
AUS	c081	2590	Soyabean Cake	Oil cakes	tonnes		1
AUS	c082	2591	Groundnut Cake	Oil cakes	tonnes		1
AUS	c083	2592	Sunflowerseed Cake	Oil cakes	tonnes		1
AUS	c084	2593	Rape and Mustard Cake	Oil cakes	tonnes		1
AUS	c085	2594	Cottonseed Cake	Oil cakes	tonnes		1
AUS	c086	2595	Palmkernel Cake	Oil cakes	tonnes		1
AUS	c087	2596	Copra Cake	Oil cakes	tonnes		1
AUS	c088	2597	Sesameseed Cake	Oil cakes	tonnes		1
AUS	c089	2598	Oilseed Cakes, Other	Oil cakes	tonnes		1
AUS	c094	2659	Alcohol, Non-Food	Ethanol	tonnes		1
AUS	c095	2661	Cotton lint	Fibre crops	tonnes		1
AUS	c096	866	Cattle	Live animals	1000 Head		1
AUS	c097	946	Buffaloes	Live animals	1000 Head		1
AUS	c098	976	Sheep	Live animals	1000 Head		1
AUS	c099	1016	Goats	Live animals	1000 Head		1
AUS	c100	1034	Pigs	Live animals	1000 Head		1
AUS	c101	2029	Poultry Birds	Live animals	1000 Head		1
AUS	c102	1096	Horses	Live animals	1000 Head		1
AUS	c103	1107	Asses	Live animals	1000 Head		1
AUS	c104	1110	Mules	Live animals	1000 Head		1
AUS	c105	1126	Camels	Live animals	1000 Head		1
AUS	c106	1157	Camelids, other	Live animals	1000 Head		1
AUS	c107	1140	Rabbits and hares	Live animals	1000 Head		1
AUS	c108	1150	Rodents, other	Live animals	1000 Head		1
AUS	c112	2746	Wool (Clean Eq.)	Hides, skins, wool	tonnes		1
AUS	c120	2748	Hides and skins	Hides, skins, wool	tonnes		1
AUS	c122	2747	Silk	Hides, skins, wool	tonnes		1
AUT	c001	2807	Rice and products	Cereals	tonnes	1.59589	0.735
AUT	c002	2511	Wheat and products	Cereals	tonnes	2.78522	0.735
AUT	c003	2513	Barley and products	Cereals	tonnes	0.519531	0.735
AUT	c004	2514	Maize and products	Cereals	tonnes	2.64778	0.735
AUT	c005	2515	Rye and products	Cereals	tonnes	2.66115	0.735
AUT	c006	2516	Oats	Cereals	tonnes	2.46058	0.735
AUT	c007	2517	Millet and products	Cereals	tonnes	3.40921	0.774533
AUT	c008	2518	Sorghum and products	Cereals	tonnes	1.89055	0.758533
AUT	c009	2520	Cereals, Other	Cereals	tonnes	3.3774	0.735
AUT	c010	2531	Potatoes and products	Roots and tubers	tonnes	0.656986	0.831541
AUT	c011	2532	Cassava and products	Roots and tubers	tonnes	1.01385	0.880478
AUT	c013	2534	Roots, Other	Roots and tubers	tonnes	0.963559	0.867573
AUT	c014	2535	Yams	Roots and tubers	tonnes	0.90566	0.881852
AUT	c012	2533	Sweet potatoes	Roots and tubers	tonnes	0.856115	0.831541
AUT	c031	2601	Tomatoes and products	Vegetables, fruit, nuts, pulses, spices	tonnes	0.10529	0.7914
AUT	c032	2602	Onions	Vegetables, fruit, nuts, pulses, spices	tonnes	0.392967	0.7914
AUT	c033	2605	Vegetables, Other	Vegetables, fruit, nuts, pulses, spices	tonnes	0.225869	0.7914
AUT	c049	2640	Pepper	Vegetables, fruit, nuts, pulses, spices	tonnes	2.90632	0.7914
AUT	c050	2641	Pimento	Vegetables, fruit, nuts, pulses, spices	tonnes	2.92401	0.7914
AUT	c051	2642	Cloves	Vegetables, fruit, nuts, pulses, spices	tonnes	2.29486	0.7914
AUT	c052	2645	Spices, Other	Vegetables, fruit, nuts, pulses, spices	tonnes	2.76378	0.7914
AUT	c034	2611	Oranges, Mandarines	Vegetables, fruit, nuts, pulses, spices	tonnes	0.216069	0.7914
AUT	c035	2612	Lemons, Limes and products	Vegetables, fruit, nuts, pulses, spices	tonnes	0.300277	0.7914
AUT	c036	2613	Grapefruit and products	Vegetables, fruit, nuts, pulses, spices	tonnes	0.211126	0.7914
AUT	c037	2614	Citrus, Other	Vegetables, fruit, nuts, pulses, spices	tonnes	0.771615	0.7914
AUT	c038	2615	Bananas	Vegetables, fruit, nuts, pulses, spices	tonnes	0.660874	0.7914
AUT	c039	2616	Plantains	Vegetables, fruit, nuts, pulses, spices	tonnes	0.740604	0.807976
AUT	c040	2617	Apples and products	Vegetables, fruit, nuts, pulses, spices	tonnes	0.466229	0.7914
AUT	c041	2618	Pineapples and products	Vegetables, fruit, nuts, pulses, spices	tonnes	0.10809	0.7914
AUT	c042	2619	Dates	Vegetables, fruit, nuts, pulses, spices	tonnes	2.40539	0.7914
AUT	c043	2620	Grapes and products (excl wine)	Vegetables, fruit, nuts, pulses, spices	tonnes	0.64903	0.7914
AUT	c044	2625	Fruits, Other	Vegetables, fruit, nuts, pulses, spices	tonnes	0.522925	0.7914
AUT	c109	2848	Milk - Excluding Butter	Milk	tonnes	0.74998	0.92535
AUT	c110	2740	Butter, Ghee	Milk	tonnes	7.37452	0.92535
AUT	c113	2731	Bovine Meat	Meat	tonnes	1.38227	0.8544
AUT	c114	2732	Mutton & Goat Meat	Meat	tonnes	2.23452	0.8544
AUT	c115	2733	Pigmeat	Meat	tonnes	1.69576	0.8544
AUT	c017	2546	Beans	Vegetables, fruit, nuts, pulses, spices	tonnes	4.50149	0.9504
AUT	c018	2547	Peas	Vegetables, fruit, nuts, pulses, spices	tonnes	1.72192	0.9504
AUT	c019	2549	Pulses, Other and products	Vegetables, fruit, nuts, pulses, spices	tonnes	3.43957	0.9504
AUT	c020	2551	Nuts and products	Vegetables, fruit, nuts, pulses, spices	tonnes	1.29596	0.9504
AUT	c021	2555	Soyabeans	Oil crops	tonnes	4.08911	0.9504
AUT	c022	2552	Groundnuts	Oil crops	tonnes	1.82735	0.9504
AUT	c023	2557	Sunflower seed	Oil crops	tonnes	4.6194	0.9504
AUT	c026	2560	Coconuts - Incl Copra	Oil crops	tonnes	1.30439	0.9504
AUT	c027	2561	Sesame seed	Oil crops	tonnes	7.13491	0.9504
AUT	c030	2570	Oilcrops, Other	Oil crops	tonnes	4.97248	0.9504
AUT	c111	2744	Eggs	Eggs	tonnes	1.2571	0.9016
AUT	c116	2734	Poultry Meat	Meat	tonnes	1.23051	0.8544
AUT	c123	2960	Fish, Seafood	Fish	tonnes	0.649543	0.853196
AUT	c074	2577	Palm Oil	Vegetable oils	tonnes	6.30756	0.954844
AUT	c068	2571	Soyabean Oil	Vegetable oils	tonnes	9.18891	0.9504
AUT	c069	2572	Groundnut Oil	Vegetable oils	tonnes	5.16576	0.9504
AUT	c070	2573	Sunflowerseed Oil	Vegetable oils	tonnes	5.49907	0.9504
AUT	c071	2574	Rape and Mustard Oil	Vegetable oils	tonnes	8.93002	0.9504
AUT	c072	2575	Cottonseed Oil	Vegetable oils	tonnes	8.70352	0.953733
AUT	c073	2576	Palmkernel Oil	Vegetable oils	tonnes	8.36406	0.954844
AUT	c075	2578	Coconut Oil	Vegetable oils	tonnes	3.79201	0.9544
AUT	c076	2579	Sesameseed Oil	Vegetable oils	tonnes	8.49291	0.9504
AUT	c077	2580	Olive Oil	Vegetable oils	tonnes	8.64569	0.9504
AUT	c078	2581	Ricebran Oil	Vegetable oils	tonnes	6.50714	0.9504
AUT	c079	2582	Maize Germ Oil	Vegetable oils	tonnes	8.82683	0.953092
AUT	c080	2586	Oilcrops Oil, Other	Vegetable oils	tonnes	7.56519	0.9504
AUT	c119	2737	Fats, Animals, Raw	Animal fats	tonnes	12.2733	0.8544
AUT	c015	2536	Sugar cane	Sugar crops	tonnes	0.304086	1
AUT	c016	2537	Sugar beet	Sugar crops	tonnes	0.558859	1
AUT	c065	2541	Sugar non-centrifugal	Sugar, sweeteners	tonnes	4.41786	0.94335
AUT	c066	2542	Sugar (Raw Equivalent)	Sugar, sweeteners	tonnes	1.63467	0.94335
AUT	c067	2543	Sweeteners, Other	Sugar, sweeteners	tonnes	0.750738	0.94335
AUT	c121	2745	Honey	Honey	tonnes	3.4066	0.94335
AUT	c045	2630	Coffee and products	Coffee, tea, cocoa	tonnes	0.198227	1
AUT	c046	2633	Cocoa Beans and products	Coffee, tea, cocoa	tonnes	3.05964	1
AUT	c047	2635	Tea (including mate)	Coffee, tea, cocoa	tonnes	0.173217	1
AUT	c090	2655	Wine	Alcohol	tonnes	0.787176	1
AUT	c091	2656	Beer	Alcohol	tonnes	0.439516	1
AUT	c092	2657	Beverages, Fermented	Alcohol	tonnes	0.573591	1
AUT	c093	2658	Beverages, Alcoholic	Alcohol	tonnes	2.80896	1
AUT	c117	2735	Meat, Other	Meat	tonnes	1.10463	0.8544
AUT	c118	2736	Offals, Edible	Meat	tonnes	1.28684	0.8544
AUT	c024	2558	Rape and Mustardseed	Oil crops	tonnes	1.95521	0.951511
AUT	c025	328	Seed cotton	Oil crops	tonnes		1
AUT	c028	254	Oil, palm fruit	Oil crops	tonnes		1
AUT	c029	2563	Olives (including preserved)	Oil crops	tonnes	0.410431	0.9504
AUT	c048	677	Hops	Vegetables, fruit, nuts, pulses, spices	tonnes		1
AUT	c053	2662	Jute	Fibre crops	tonnes		1
AUT	c054	2663	Jute-Like Fibres	Fibre crops	tonnes		1
AUT	c055	2664	Soft-Fibres, Other	Fibre crops	tonnes		1
AUT	c056	2665	Sisal	Fibre crops	tonnes		1
AUT	c057	2666	Abaca	Fibre crops	tonnes		1
AUT	c058	2667	Hard Fibres, Other	Fibre crops	tonnes		1
AUT	c059	2671	Tobacco	Tobacco, rubber	tonnes		1
AUT	c060	2672	Rubber	Tobacco, rubber	tonnes		1
AUT	c061	2000	Fodder crops	Fodder crops	tonnes		1
AUT	c062	2001	Grazing	Grazing	tonnes		1
AUT	c063	2559	Cottonseed	Fibre crops	tonnes	4.90679	1
AUT	c064	2562	Palm kernels	Oil crops	tonnes		1
AUT	c081	2590	Soyabean Cake	Oil cakes	tonnes		1
AUT	c082	2591	Groundnut Cake	Oil cakes	tonnes		1
AUT	c083	2592	Sunflowerseed Cake	Oil cakes	tonnes		1
AUT	c084	2593	Rape and Mustard Cake	Oil cakes	tonnes		1
AUT	c085	2594	Cottonseed Cake	Oil cakes	tonnes		1
AUT	c086	2595	Palmkernel Cake	Oil cakes	tonnes		1
AUT	c087	2596	Copra Cake	Oil cakes	tonnes		1
AUT	c088	2597	Sesameseed Cake	Oil cakes	tonnes		1
AUT	c089	2598	Oilseed Cakes, Other	Oil cakes	tonnes		1
AUT	c094	2659	Alcohol, Non-Food	Ethanol	tonnes		1
AUT	c095	2661	Cotton lint	Fibre crops	tonnes		1
AUT	c096	866	Cattle	Live animals	1000 Head		1
AUT	c097	946	Buffaloes	Live animals	1000 Head		1
AUT	c098	976	Sheep	Live animals	1000 Head		1
AUT	c099	1016	Goats	Live animals	1000 Head		1
AUT	c100	1034	Pigs	Live animals	1000 Head		1
AUT	c101	2029	Poultry Birds	Live animals	1000 Head		1
AUT	c102	1096	Horses	Live animals	1000 Head		1
AUT	c103	1107	Asses	Live animals	1000 Head		1
AUT	c104	1110	Mules	Live animals	1000 Head		1
AUT	c105	1126	Camels	Live animals	1000 Head		1
AUT	c106	1157	Camelids, other	Live animals	1000 Head		1
AUT	c107	1140	Rabbits and hares	Live animals	1000 Head		1
AUT	c108	1150	Rodents, other	Live animals	1000 Head		1
AUT	c112	2746	Wool (Clean Eq.)	Hides, skins, wool	tonnes		1
AUT	c120	2748	Hides and skins	Hides, skins, wool	tonnes		1
AUT	c122	2747	Silk	Hides, skins, wool	tonnes		1
BHS	c001	2807	Rice and products	Cereals	tonnes	2.45071	0.864
BHS	c002	2511	Wheat and products	Cereals	tonnes	2.07013	0.864
BHS	c003	2513	Barley and products	Cereals	tonnes	3.15103	0.864
BHS	c004	2514	Maize and products	Cereals	tonnes	2.95441	0.864
BHS	c005	2515	Rye and products	Cereals	tonnes	2.57538	0.744989
BHS	c006	2516	Oats	Cereals	tonnes	1.49444	0.864
BHS	c007	2517	Millet and products	Cereals	tonnes	3.40921	0.774533
BHS	c008	2518	Sorghum and products	Cereals	tonnes	1.89055	0.758533
BHS	c009	2520	Cereals, Other	Cereals	tonnes	2.35193	0.864
BHS	c010	2531	Potatoes and products	Roots and tubers	tonnes	0.570193	0.94672
BHS	c011	2532	Cassava and products	Roots and tubers	tonnes	0.866076	0.94672
BHS	c013	2534	Roots, Other	Roots and tubers	tonnes	0.963559	0.94672
BHS	c014	2535	Yams	Roots and tubers	tonnes	0.90566	0.881852
BHS	c012	2533	Sweet potatoes	Roots and tubers	tonnes	0.931608	0.94672
BHS	c031	2601	Tomatoes and products	Vegetables, fruit, nuts, pulses, spices	tonnes	0.135255	0.8811
BHS	c032	2602	Onions	Vegetables, fruit, nuts, pulses, spices	tonnes	0.409522	0.8811
BHS	c033	2605	Vegetables, Other	Vegetables, fruit, nuts, pulses, spices	tonnes	0.2304	0.8811
BHS	c049	2640	Pepper	Vegetables, fruit, nuts, pulses, spices	tonnes	2.67548	0.8811
BHS	c050	2641	Pimento	Vegetables, fruit, nuts, pulses, spices	tonnes	2.82459	0.8811
BHS	c051	2642	Cloves	Vegetables, fruit, nuts, pulses, spices	tonnes	2.29486	0.8811
BHS	c052	2645	Spices, Other	Vegetables, fruit, nuts, pulses, spices	tonnes	1.89746	0.8811
BHS	c034	2611	Oranges, Mandarines	Vegetables, fruit, nuts, pulses, spices	tonnes	0.20841	0.8811
BHS	c035	2612	Lemons, Limes and products	Vegetables, fruit, nuts, pulses, spices	tonnes	0.149973	0.8811
BHS	c036	2613	Grapefruit and products	Vegetables, fruit, nuts, pulses, spices	tonnes	0.23507	0.8811
BHS	c037	2614	Citrus, Other	Vegetables, fruit, nuts, pulses, spices	tonnes	0.729233	0.8811
BHS	c038	2615	Bananas	Vegetables, fruit, nuts, pulses, spices	tonnes	0.673157	0.8811
BHS	c039	2616	Plantains	Vegetables, fruit, nuts, pulses, spices	tonnes	0.740604	0.8811
BHS	c040	2617	Apples and products	Vegetables, fruit, nuts, pulses, spices	tonnes	0.260868	0.8811
BHS	c041	2618	Pineapples and products	Vegetables, fruit, nuts, pulses, spices	tonnes	0.0889101	0.8811
BHS	c042	2619	Dates	Vegetables, fruit, nuts, pulses, spices	tonnes	1.83727	0.804114
BHS	c043	2620	Grapes and products (excl wine)	Vegetables, fruit, nuts, pulses, spices	tonnes	0.64835	0.8811
BHS	c044	2625	Fruits, Other	Vegetables, fruit, nuts, pulses, spices	tonnes	0.582736	0.8811
BHS	c109	2848	Milk - Excluding Butter	Milk	tonnes	2.14712	0.8832
BHS	c110	2740	Butter, Ghee	Milk	tonnes	3.87488	0.8832
BHS	c113	2731	Bovine Meat	Meat	tonnes	1.28892	0.893
BHS	c114	2732	Mutton & Goat Meat	Meat	tonnes	1.36864	0.893
BHS	c115	2733	Pigmeat	Meat	tonnes	2.17854	0.893
BHS	c017	2546	Beans	Vegetables, fruit, nuts, pulses, spices	tonnes	3.10254	0.9604
BHS	c018	2547	Peas	Vegetables, fruit, nuts, pulses, spices	tonnes	2.54484	0.9604
BHS	c019	2549	Pulses, Other and products	Vegetables, fruit, nuts, pulses, spices	tonnes	3.35803	0.9604
BHS	c020	2551	Nuts and products	Vegetables, fruit, nuts, pulses, spices	tonnes	1.12838	0.9604
BHS	c021	2555	Soyabeans	Oil crops	tonnes	3.91378	0.9604
BHS	c022	2552	Groundnuts	Oil crops	tonnes	1.19244	0.9604
BHS	c023	2557	Sunflower seed	Oil crops	tonnes	4.42939	0.9604
BHS	c026	2560	Coconuts - Incl Copra	Oil crops	tonnes	0.996776	0.9604
BHS	c027	2561	Sesame seed	Oil crops	tonnes	5.74824	0.9604
BHS	c030	2570	Oilcrops, Other	Oil crops	tonnes	2.84212	0.9604
BHS	c111	2744	Eggs	Eggs	tonnes	1.1385	0.9216
BHS	c116	2734	Poultry Meat	Meat	tonnes	1.3843	0.893
BHS	c123	2960	Fish, Seafood	Fish	tonnes	0.663472	0.8908
BHS	c074	2577	Palm Oil	Vegetable oils	tonnes	6.30756	0.9604
BHS	c068	2571	Soyabean Oil	Vegetable oils	tonnes	8.32466	0.9604
BHS	c069	2572	Groundnut Oil	Vegetable oils	tonnes	8.52514	0.9604
BHS	c070	2573	Sunflowerseed Oil	Vegetable oils	tonnes	6.72404	0.9526
BHS	c071	2574	Rape and Mustard Oil	Vegetable oils	tonnes	6.42825	0.952013
BHS	c072	2575	Cottonseed Oil	Vegetable oils	tonnes	8.70352	0.953733
BHS	c073	2576	Palmkernel Oil	Vegetable oils	tonnes	8.36406	0.954844
BHS	c075	2578	Coconut Oil	Vegetable oils	tonnes	6.18122	0.9604
BHS	c076	2579	Sesameseed Oil	Vegetable oils	tonnes	8.49291	0.9604
BHS	c077	2580	Olive Oil	Vegetable oils	tonnes	8.82535	0.9604
BHS	c078	2581	Ricebran Oil	Vegetable oils	tonnes	6.50714	0.9504
BHS	c079	2582	Maize Germ Oil	Vegetable oils	tonnes	8.82683	0.9604
BHS	c080	2586	Oilcrops Oil, Other	Vegetable oils	tonnes	8.90437	0.9604
BHS	c119	2737	Fats, Animals, Raw	Animal fats	tonnes	4.1438	0.893
BHS	c015	2536	Sugar cane	Sugar crops	tonnes	0.304086	1
BHS	c016	2537	Sugar beet	Sugar crops	tonnes	0.558859	1
BHS	c065	2541	Sugar non-centrifugal	Sugar, sweeteners	tonnes	4.41786	0.94335
BHS	c066	2542	Sugar (Raw Equivalent)	Sugar, sweeteners	tonnes	3.68569	0.94335
BHS	c067	2543	Sweeteners, Other	Sugar, sweeteners	tonnes	0.472512	0.94335
BHS	c121	2745	Honey	Honey	tonnes	3.25138	0.94335
BHS	c045	2630	Coffee and products	Coffee, tea, cocoa	tonnes	0.315492	1
BHS	c046	2633	Cocoa Beans and products	Coffee, tea, cocoa	tonnes	6.53708	1
BHS	c047	2635	Tea (including mate)	Coffee, tea, cocoa	tonnes	0.12218	1
BHS	c090	2655	Wine	Alcohol	tonnes	0.665899	1
BHS	c091	2656	Beer	Alcohol	tonnes	0.405237	1
BHS	c092	2657	Beverages, Fermented	Alcohol	tonnes	0.682807	1
BHS	c093	2658	Beverages, Alcoholic	Alcohol	tonnes	2.88467	1
BHS	c117	2735	Meat, Other	Meat	tonnes	1.52725	0.893
BHS	c118	2736	Offals, Edible	Meat	tonnes	1.03691	0.893
BHS	c024	2558	Rape and Mustardseed	Oil crops	tonnes	1.20196	0.951511
BHS	c025	328	Seed cotton	Oil crops	tonnes		1
BHS	c028	254	Oil, palm fruit	Oil crops	tonnes		1
BHS	c029	2563	Olives (including preserved)	Oil crops	tonnes	0.777446	0.9604
BHS	c048	677	Hops	Vegetables, fruit, nuts, pulses, spices	tonnes		1
BHS	c053	2662	Jute	Fibre crops	tonnes		1
BHS	c054	2663	Jute-Like Fibres	Fibre crops	tonnes		1
BHS	c055	2664	Soft-Fibres, Other	Fibre crops	tonnes		1
BHS	c056	2665	Sisal	Fibre crops	tonnes		1
BHS	c057	2666	Abaca	Fibre crops	tonnes		1
BHS	c058	2667	Hard Fibres, Other	Fibre crops	tonnes		1
BHS	c059	2671	Tobacco	Tobacco, rubber	tonnes		1
BHS	c060	2672	Rubber	Tobacco, rubber	tonnes		1
BHS	c061	2000	Fodder crops	Fodder crops	tonnes		1
BHS	c062	2001	Grazing	Grazing	tonnes		1
BHS	c063	2559	Cottonseed	Fibre crops	tonnes	4.90679	1
BHS	c064	2562	Palm kernels	Oil crops	tonnes		1
BHS	c081	2590	Soyabean Cake	Oil cakes	tonnes		1
BHS	c082	2591	Groundnut Cake	Oil cakes	tonnes		1
BHS	c083	2592	Sunflowerseed Cake	Oil cakes	tonnes		1
BHS	c084	2593	Rape and Mustard Cake	Oil cakes	tonnes		1
BHS	c085	2594	Cottonseed Cake	Oil cakes	tonnes		1
BHS	c086	2595	Palmkernel Cake	Oil cakes	tonnes		1
BHS	c087	2596	Copra Cake	Oil cakes	tonnes		1
BHS	c088	2597	Sesameseed Cake	Oil cakes	tonnes		1
BHS	c089	2598	Oilseed Cakes, Other	Oil cakes	tonnes		1
BHS	c094	2659	Alcohol, Non-Food	Ethanol	tonnes		1
BHS	c095	2661	Cotton lint	Fibre crops	tonnes		1
BHS	c096	866	Cattle	Live animals	1000 Head		1
BHS	c097	946	Buffaloes	Live animals	1000 Head		1
BHS	c098	976	Sheep	Live animals	1000 Head		1
BHS	c099	1016	Goats	Live animals	1000 Head		1
BHS	c100	1034	Pigs	Live animals	1000 Head		1
BHS	c101	2029	Poultry Birds	Live animals	1000 Head		1
BHS	c102	1096	Horses	Live animals	1000 Head		1
BHS	c103	1107	Asses	Live animals	1000 Head		1
BHS	c104	1110	Mules	Live animals	1000 Head		1
BHS	c105	1126	Camels	Live animals	1000 Head		1
BHS	c106	1157	Camelids, other	Live animals	1000 Head		1
BHS	c107	1140	Rabbits and hares	Live animals	1000 Head		1
BHS	c108	1150	Rodents, other	Live animals	1000 Head		1
BHS	c112	2746	Wool (Clean Eq.)	Hides, skins, wool	tonnes		1
BHS	c120	2748	Hides and skins	Hides, skins, wool	tonnes		1
BHS	c122	2747	Silk	Hides, skins, wool	tonnes		1
BHR	c001	2807	Rice and products	Cereals	tonnes	2.45586	0.768407
BHR	c002	2511	Wheat and products	Cereals	tonnes	2.50309	0.768407
BHR	c003	2513	Barley and products	Cereals	tonnes	2.10916	0.75504
BHR	c004	2514	Maize and products	Cereals	tonnes	2.81613	0.773688
BHR	c005	2515	Rye and products	Cereals	tonnes	2.57538	0.744989
BHR	c006	2516	Oats	Cereals	tonnes	2.01829	0.764188
BHR	c007	2517	Millet and products	Cereals	tonnes	3.40921	0.774533
BHR	c008	2518	Sorghum and products	Cereals	tonnes	1.89055	0.758533
BHR	c009	2520	Cereals, Other	Cereals	tonnes	1.81774	0.767356
BHR	c010	2531	Potatoes and products	Roots and tubers	tonnes	0.559391	0.853433
BHR	c011	2532	Cassava and products	Roots and tubers	tonnes	1.01385	0.880478
BHR	c013	2534	Roots, Other	Roots and tubers	tonnes	0.601056	0.867573
BHR	c014	2535	Yams	Roots and tubers	tonnes	0.47443	0.881852
BHR	c012	2533	Sweet potatoes	Roots and tubers	tonnes	0.939046	0.860459
BHR	c031	2601	Tomatoes and products	Vegetables, fruit, nuts, pulses, spices	tonnes	0.166449	0.810407
BHR	c032	2602	Onions	Vegetables, fruit, nuts, pulses, spices	tonnes	0.393995	0.810116
BHR	c033	2605	Vegetables, Other	Vegetables, fruit, nuts, pulses, spices	tonnes	0.258174	0.810407
BHR	c049	2640	Pepper	Vegetables, fruit, nuts, pulses, spices	tonnes	2.67548	0.809098
BHR	c050	2641	Pimento	Vegetables, fruit, nuts, pulses, spices	tonnes	2.55722	0.803525
BHR	c051	2642	Cloves	Vegetables, fruit, nuts, pulses, spices	tonnes	2.29486	0.824048
BHR	c052	2645	Spices, Other	Vegetables, fruit, nuts, pulses, spices	tonnes	2.3623	0.810407
BHR	c034	2611	Oranges, Mandarines	Vegetables, fruit, nuts, pulses, spices	tonnes	0.25124	0.810407
BHR	c035	2612	Lemons, Limes and products	Vegetables, fruit, nuts, pulses, spices	tonnes	0.257011	0.810407
BHR	c036	2613	Grapefruit and products	Vegetables, fruit, nuts, pulses, spices	tonnes	0.174503	0.809098
BHR	c037	2614	Citrus, Other	Vegetables, fruit, nuts, pulses, spices	tonnes	1.06444	0.809432
BHR	c038	2615	Bananas	Vegetables, fruit, nuts, pulses, spices	tonnes	0.65166	0.810845
BHR	c039	2616	Plantains	Vegetables, fruit, nuts, pulses, spices	tonnes	0.77833	0.807976
BHR	c040	2617	Apples and products	Vegetables, fruit, nuts, pulses, spices	tonnes	0.307804	0.810407
BHR	c041	2618	Pineapples and products	Vegetables, fruit, nuts, pulses, spices	tonnes	0.0876508	0.810407
BHR	c042	2619	Dates	Vegetables, fruit, nuts, pulses, spices	tonnes	2.07146	0.804114
BHR	c043	2620	Grapes and products (excl wine)	Vegetables, fruit, nuts, pulses, spices	tonnes	0.717888	0.810407
BHR	c044	2625	Fruits, Other	Vegetables, fruit, nuts, pulses, spices	tonnes	0.468531	0.810407
BHR	c109	2848	Milk - Excluding Butter	Milk	tonnes	0.846602	0.909419
BHR	c110	2740	Butter, Ghee	Milk	tonnes	7.21094	0.909419
BHR	c113	2731	Bovine Meat	Meat	tonnes	1.54631	0.863444
BHR	c114	2732	Mutton & Goat Meat	Meat	tonnes	2.31209	0.863444
BHR	c115	2733	Pigmeat	Meat	tonnes	3.52984	0.862835
BHR	c017	2546	Beans	Vegetables, fruit, nuts, pulses, spices	tonnes	3.10254	0.953092
BHR	c018	2547	Peas	Vegetables, fruit, nuts, pulses, spices	tonnes	4.16554	0.953145
BHR	c019	2549	Pulses, Other and products	Vegetables, fruit, nuts, pulses, spices	tonnes	3.3	0.952993
BHR	c020	2551	Nuts and products	Vegetables, fruit, nuts, pulses, spices	tonnes	0.777343	0.952945
BHR	c021	2555	Soyabeans	Oil crops	tonnes	6.14717	0.952945
BHR	c022	2552	Groundnuts	Oil crops	tonnes	1.64443	0.952945
BHR	c023	2557	Sunflower seed	Oil crops	tonnes	4.2141	0.954313
BHR	c026	2560	Coconuts - Incl Copra	Oil crops	tonnes	0.991577	0.952945
BHR	c027	2561	Sesame seed	Oil crops	tonnes	5.74824	0.9529
BHR	c030	2570	Oilcrops, Other	Oil crops	tonnes	2.84212	0.952139
BHR	c111	2744	Eggs	Eggs	tonnes	1.23186	0.893171
BHR	c116	2734	Poultry Meat	Meat	tonnes	1.42373	0.863444
BHR	c123	2960	Fish, Seafood	Fish	tonnes	0.606206	0.864414
BHR	c074	2577	Palm Oil	Vegetable oils	tonnes	9.60269	0.954844
BHR	c068	2571	Soyabean Oil	Vegetable oils	tonnes	7.22095	0.953042
BHR	c069	2572	Groundnut Oil	Vegetable oils	tonnes	8.52514	0.95265
BHR	c070	2573	Sunflowerseed Oil	Vegetable oils	tonnes	8.65238	0.9526
BHR	c071	2574	Rape and Mustard Oil	Vegetable oils	tonnes	8.28082	0.952013
BHR	c072	2575	Cottonseed Oil	Vegetable oils	tonnes	8.70352	0.953733
BHR	c073	2576	Palmkernel Oil	Vegetable oils	tonnes	8.36406	0.954844
BHR	c075	2578	Coconut Oil	Vegetable oils	tonnes	9.34369	0.9544
BHR	c076	2579	Sesameseed Oil	Vegetable oils	tonnes	8.49291	0.95343
BHR	c077	2580	Olive Oil	Vegetable oils	tonnes	7.44983	0.952945
BHR	c078	2581	Ricebran Oil	Vegetable oils	tonnes	6.50714	0.9504
BHR	c079	2582	Maize Germ Oil	Vegetable oils	tonnes	12.6823	0.953092
BHR	c080	2586	Oilcrops Oil, Other	Vegetable oils	tonnes	7.49579	0.952945
BHR	c119	2737	Fats, Animals, Raw	Animal fats	tonnes	7.69492	0.863444
BHR	c015	2536	Sugar cane	Sugar crops	tonnes	0.304086	1
BHR	c016	2537	Sugar beet	Sugar crops	tonnes	0.558859	1
BHR	c065	2541	Sugar non-centrifugal	Sugar, sweeteners	tonnes	4.41786	0.94335
BHR	c066	2542	Sugar (Raw Equivalent)	Sugar, sweeteners	tonnes	3.76776	0.94335
BHR	c067	2543	Sweeteners, Other	Sugar, sweeteners	tonnes	0.770878	0.94335
BHR	c121	2745	Honey	Honey	tonnes	1.83774	0.94335
BHR	c045	2630	Coffee and products	Coffee, tea, cocoa	tonnes	0.35402	1
BHR	c046	2633	Cocoa Beans and products	Coffee, tea, cocoa	tonnes	5.92822	1
BHR	c047	2635	Tea (including mate)	Coffee, tea, cocoa	tonnes	0.122697	1
BHR	c090	2655	Wine	Alcohol	tonnes	1.09829	1
BHR	c091	2656	Beer	Alcohol	tonnes	0.439547	1
BHR	c092	2657	Beverages, Fermented	Alcohol	tonnes	0.682807	1
BHR	c093	2658	Beverages, Alcoholic	Alcohol	tonnes	3.07301	1
BHR	c117	2735	Meat, Other	Meat	tonnes	1.70481	0.863444
BHR	c118	2736	Offals, Edible	Meat	tonnes	1.13991	0.863444
BHR	c024	2558	Rape and Mustardseed	Oil crops	tonnes	1.20196	0.951511
BHR	c025	328	Seed cotton	Oil crops	tonnes		1
BHR	c028	254	Oil, palm fruit	Oil crops	tonnes		1
BHR	c029	2563	Olives (including preserved)	Oil crops	tonnes	1.18394	0.952664
BHR	c048	677	Hops	Vegetables, fruit, nuts, pulses, spices	tonnes		1
BHR	c053	2662	Jute	Fibre crops	tonnes		1
BHR	c054	2663	Jute-Like Fibres	Fibre crops	tonnes		1
BHR	c055	2664	Soft-Fibres, Other	Fibre crops	tonnes		1
BHR	c056	2665	Sisal	Fibre crops	tonnes		1
BHR	c057	2666	Abaca	Fibre crops	tonnes		1
BHR	c058	2667	Hard Fibres, Other	Fibre crops	tonnes		1
BHR	c059	2671	Tobacco	Tobacco, rubber	tonnes		1
BHR	c060	2672	Rubber	Tobacco, rubber	tonnes		1
BHR	c061	2000	Fodder crops	Fodder crops	tonnes		1
BHR	c062	2001	Grazing	Grazing	tonnes		1
BHR	c063	2559	Cottonseed	Fibre crops	tonnes	4.90679	1
BHR	c064	2562	Palm kernels	Oil crops	tonnes		1
BHR	c081	2590	Soyabean Cake	Oil cakes	tonnes		1
BHR	c082	2591	Groundnut Cake	Oil cakes	tonnes		1
BHR	c083	2592	Sunflowerseed Cake	Oil cakes	tonnes		1
BHR	c084	2593	Rape and Mustard Cake	Oil cakes	tonnes		1
BHR	c085	2594	Cottonseed Cake	Oil cakes	tonnes		1
BHR	c086	2595	Palmkernel Cake	Oil cakes	tonnes		1
BHR	c087	2596	Copra Cake	Oil cakes	tonnes		1
BHR	c088	2597	Sesameseed Cake	Oil cakes	tonnes		1
BHR	c089	2598	Oilseed Cakes, Other	Oil cakes	tonnes		1
BHR	c094	2659	Alcohol, Non-Food	Ethanol	tonnes		1
BHR	c095	2661	Cotton lint	Fibre crops	tonnes		1
BHR	c096	866	Cattle	Live animals	1000 Head		1
BHR	c097	946	Buffaloes	Live animals	1000 Head		1
BHR	c098	976	Sheep	Live animals	1000 Head		1
BHR	c099	1016	Goats	Live animals	1000 Head		1
BHR	c100	1034	Pigs	Live animals	1000 Head		1
BHR	c101	2029	Poultry Birds	Live animals	1000 Head		1
BHR	c102	1096	Horses	Live animals	1000 Head		1
BHR	c103	1107	Asses	Live animals	1000 Head		1
BHR	c104	1110	Mules	Live animals	1000 Head		1
BHR	c105	1126	Camels	Live animals	1000 Head		1
BHR	c106	1157	Camelids, other	Live animals	1000 Head		1
BHR	c107	1140	Rabbits and hares	Live animals	1000 Head		1
BHR	c108	1150	Rodents, other	Live animals	1000 Head		1
BHR	c112	2746	Wool (Clean Eq.)	Hides, skins, wool	tonnes		1
BHR	c120	2748	Hides and skins	Hides, skins, wool	tonnes		1
BHR	c122	2747	Silk	Hides, skins, wool	tonnes		1
BRB	c001	2807	Rice and products	Cereals	tonnes	2.76334	0.864
BRB	c002	2511	Wheat and products	Cereals	tonnes	2.75722	0.864
BRB	c003	2513	Barley and products	Cereals	tonnes	0.835479	0.75504
BRB	c004	2514	Maize and products	Cereals	tonnes	3.22616	0.864
BRB	c005	2515	Rye and products	Cereals	tonnes	2.57538	0.864
BRB	c006	2516	Oats	Cereals	tonnes	2.34998	0.864
BRB	c007	2517	Millet and products	Cereals	tonnes	3.40921	0.774533
BRB	c008	2518	Sorghum and products	Cereals	tonnes	1.89055	0.758533
BRB	c009	2520	Cereals, Other	Cereals	tonnes	2.35193	0.864
BRB	c010	2531	Potatoes and products	Roots and tubers	tonnes	0.601788	0.94672
BRB	c011	2532	Cassava and products	Roots and tubers	tonnes	1.01946	0.94672
BRB	c013	2534	Roots, Other	Roots and tubers	tonnes	0.963559	0.94672
BRB	c014	2535	Yams	Roots and tubers	tonnes	0.90566	0.94672
BRB	c012	2533	Sweet potatoes	Roots and tubers	tonnes	0.757945	0.94672
BRB	c031	2601	Tomatoes and products	Vegetables, fruit, nuts, pulses, spices	tonnes	0.139716	0.8811
BRB	c032	2602	Onions	Vegetables, fruit, nuts, pulses, spices	tonnes	0.458501	0.8811
BRB	c033	2605	Vegetables, Other	Vegetables, fruit, nuts, pulses, spices	tonnes	0.244338	0.8811
BRB	c049	2640	Pepper	Vegetables, fruit, nuts, pulses, spices	tonnes	2.67548	0.8811
BRB	c050	2641	Pimento	Vegetables, fruit, nuts, pulses, spices	tonnes	2.82459	0.8811
BRB	c051	2642	Cloves	Vegetables, fruit, nuts, pulses, spices	tonnes	2.29486	0.8811
BRB	c052	2645	Spices, Other	Vegetables, fruit, nuts, pulses, spices	tonnes	2.31812	0.8811
BRB	c034	2611	Oranges, Mandarines	Vegetables, fruit, nuts, pulses, spices	tonnes	0.30195	0.8811
BRB	c035	2612	Lemons, Limes and products	Vegetables, fruit, nuts, pulses, spices	tonnes	0.151998	0.8811
BRB	c036	2613	Grapefruit and products	Vegetables, fruit, nuts, pulses, spices	tonnes	0.144756	0.8811
BRB	c037	2614	Citrus, Other	Vegetables, fruit, nuts, pulses, spices	tonnes	0.729233	0.8811
BRB	c038	2615	Bananas	Vegetables, fruit, nuts, pulses, spices	tonnes	0.680552	0.8811
BRB	c039	2616	Plantains	Vegetables, fruit, nuts, pulses, spices	tonnes	1.0123	0.8811
BRB	c040	2617	Apples and products	Vegetables, fruit, nuts, pulses, spices	tonnes	0.37394	0.8811
BRB	c041	2618	Pineapples and products	Vegetables, fruit, nuts, pulses, spices	tonnes	0.21853	0.8811
BRB	c042	2619	Dates	Vegetables, fruit, nuts, pulses, spices	tonnes	1.83727	0.8811
BRB	c043	2620	Grapes and products (excl wine)	Vegetables, fruit, nuts, pulses, spices	tonnes	0.706044	0.8811
BRB	c044	2625	Fruits, Other	Vegetables, fruit, nuts, pulses, spices	tonnes	0.583512	0.8811
BRB	c109	2848	Milk - Excluding Butter	Milk	tonnes	2.69452	0.8832
BRB	c110	2740	Butter, Ghee	Milk	tonnes	7.39982	0.8832
BRB	c113	2731	Bovine Meat	Meat	tonnes	1.25756	0.893
BRB	c114	2732	Mutton & Goat Meat	Meat	tonnes	2.4508	0.893
BRB	c115	2733	Pigmeat	Meat	tonnes	1.91088	0.893
BRB	c017	2546	Beans	Vegetables, fruit, nuts, pulses, spices	tonnes	3.10254	0.9604
BRB	c018	2547	Peas	Vegetables, fruit, nuts, pulses, spices	tonnes	2.54484	0.9604
BRB	c019	2549	Pulses, Other and products	Vegetables, fruit, nuts, pulses, spices	tonnes	4.70735	0.9604
BRB	c020	2551	Nuts and products	Vegetables, fruit, nuts, pulses, spices	tonnes	1.01277	0.9604
BRB	c021	2555	Soyabeans	Oil crops	tonnes	3.91378	0.9604
BRB	c022	2552	Groundnuts	Oil crops	tonnes	1.35803	0.9604
BRB	c023	2557	Sunflower seed	Oil crops	tonnes	4.42939	0.9604
BRB	c026	2560	Coconuts - Incl Copra	Oil crops	tonnes	0.918132	0.9604
BRB	c027	2561	Sesame seed	Oil crops	tonnes	5.74824	0.9604
BRB	c030	2570	Oilcrops, Other	Oil crops	tonnes	2.84212	0.952139
BRB	c111	2744	Eggs	Eggs	tonnes	1.41597	0.9216
BRB	c116	2734	Poultry Meat	Meat	tonnes	1.35278	0.893
BRB	c123	2960	Fish, Seafood	Fish	tonnes	0.768784	0.8908
BRB	c074	2577	Palm Oil	Vegetable oils	tonnes	6.30756	0.954844
BRB	c068	2571	Soyabean Oil	Vegetable oils	tonnes	5.12598	0.9604
BRB	c069	2572	Groundnut Oil	Vegetable oils	tonnes	8.52514	0.95265
BRB	c070	2573	Sunflowerseed Oil	Vegetable oils	tonnes	6.72404	0.9604
BRB	c071	2574	Rape and Mustard Oil	Vegetable oils	tonnes	6.42825	0.952013
BRB	c072	2575	Cottonseed Oil	Vegetable oils	tonnes	8.70352	0.953733
BRB	c073	2576	Palmkernel Oil	Vegetable oils	tonnes	8.36406	0.954844
BRB	c075	2578	Coconut Oil	Vegetable oils	tonnes	6.18122	0.9544
BRB	c076	2579	Sesameseed Oil	Vegetable oils	tonnes	8.49291	0.9604
BRB	c077	2580	Olive Oil	Vegetable oils	tonnes	8.82535	0.9604
BRB	c078	2581	Ricebran Oil	Vegetable oils	tonnes	6.50714	0.9504
BRB	c079	2582	Maize Germ Oil	Vegetable oils	tonnes	8.82683	0.9604
BRB	c080	2586	Oilcrops Oil, Other	Vegetable oils	tonnes	5.00384	0.9604
BRB	c119	2737	Fats, Animals, Raw	Animal fats	tonnes	7.87628	0.893
BRB	c015	2536	Sugar cane	Sugar crops	tonnes	0.304086	1
BRB	c016	2537	Sugar beet	Sugar crops	tonnes	0.558859	1
BRB	c065	2541	Sugar non-centrifugal	Sugar, sweeteners	tonnes	4.41786	0.94335
BRB	c066	2542	Sugar (Raw Equivalent)	Sugar, sweeteners	tonnes	3.67507	0.94335
BRB	c067	2543	Sweeteners, Other	Sugar, sweeteners	tonnes	0.407545	0.94335
BRB	c121	2745	Honey	Honey	tonnes	3.25138	0.94335
BRB	c045	2630	Coffee and products	Coffee, tea, cocoa	tonnes	0.379418	1
BRB	c046	2633	Cocoa Beans and products	Coffee, tea, cocoa	tonnes	6.53708	1
BRB	c047	2635	Tea (including mate)	Coffee, tea, cocoa	tonnes	0.12218	1
BRB	c090	2655	Wine	Alcohol	tonnes	0.617959	1
BRB	c091	2656	Beer	Alcohol	tonnes	0.4181	1
BRB	c092	2657	Beverages, Fermented	Alcohol	tonnes	0.323067	1
BRB	c093	2658	Beverages, Alcoholic	Alcohol	tonnes	2.79656	1
BRB	c117	2735	Meat, Other	Meat	tonnes	1.52725	0.893
BRB	c118	2736	Offals, Edible	Meat	tonnes	1.298	0.893
BRB	c024	2558	Rape and Mustardseed	Oil crops	tonnes	0.664954	0.9604
BRB	c025	328	Seed cotton	Oil crops	tonnes		1
BRB	c028	254	Oil, palm fruit	Oil crops	tonnes		1
BRB	c029	2563	Olives (including preserved)	Oil crops	tonnes	0.777446	0.9604
BRB	c048	677	Hops	Vegetables, fruit, nuts, pulses, spices	tonnes		1
BRB	c053	2662	Jute	Fibre crops	tonnes		1
BRB	c054	2663	Jute-Like Fibres	Fibre crops	tonnes		1
BRB	c055	2664	Soft-Fibres, Other	Fibre crops	tonnes		1
BRB	c056	2665	Sisal	Fibre crops	tonnes		1
BRB	c057	2666	Abaca	Fibre crops	tonnes		1
BRB	c058	2667	Hard Fibres, Other	Fibre crops	tonnes		1
BRB	c059	2671	Tobacco	Tobacco, rubber	tonnes		1
BRB	c060	2672	Rubber	Tobacco, rubber	tonnes		1
BRB	c061	2000	Fodder crops	Fodder crops	tonnes		1
BRB	c062	2001	Grazing	Grazing	tonnes		1
BRB	c063	2559	Cottonseed	Fibre crops	tonnes	4.90679	1
BRB	c064	2562	Palm kernels	Oil crops	tonnes		1
BRB	c081	2590	Soyabean Cake	Oil cakes	tonnes		1
BRB	c082	2591	Groundnut Cake	Oil cakes	tonnes		1
BRB	c083	2592	Sunflowerseed Cake	Oil cakes	tonnes		1
BRB	c084	2593	Rape and Mustard Cake	Oil cakes	tonnes		1
BRB	c085	2594	Cottonseed Cake	Oil cakes	tonnes		1
BRB	c086	2595	Palmkernel Cake	Oil cakes	tonnes		1
BRB	c087	2596	Copra Cake	Oil cakes	tonnes		1
BRB	c088	2597	Sesameseed Cake	Oil cakes	tonnes		1
BRB	c089	2598	Oilseed Cakes, Other	Oil cakes	tonnes		1
BRB	c094	2659	Alcohol, Non-Food	Ethanol	tonnes		1
BRB	c095	2661	Cotton lint	Fibre crops	tonnes		1
BRB	c096	866	Cattle	Live animals	1000 Head		1
BRB	c097	946	Buffaloes	Live animals	1000 Head		1
BRB	c098	976	Sheep	Live animals	1000 Head		1
BRB	c099	1016	Goats	Live animals	1000 Head		1
BRB	c100	1034	Pigs	Live animals	1000 Head		1
BRB	c101	2029	Poultry Birds	Live animals	1000 Head		1
BRB	c102	1096	Horses	Live animals	1000 Head		1
BRB	c103	1107	Asses	Live animals	1000 Head		1
BRB	c104	1110	Mules	Live animals	1000 Head		1
BRB	c105	1126	Camels	Live animals	1000 Head		1
BRB	c106	1157	Camelids, other	Live animals	1000 Head		1
BRB	c107	1140	Rabbits and hares	Live animals	1000 Head		1
BRB	c108	1150	Rodents, other	Live animals	1000 Head		1
BRB	c112	2746	Wool (Clean Eq.)	Hides, skins, wool	tonnes		1
BRB	c120	2748	Hides and skins	Hides, skins, wool	tonnes		1
BRB	c122	2747	Silk	Hides, skins, wool	tonnes		1
BRN	c001	2807	Rice and products	Cereals	tonnes	2.36466	0.768407
BRN	c002	2511	Wheat and products	Cereals	tonnes	2.40864	0.768407
BRN	c003	2513	Barley and products	Cereals	tonnes	1.20842	0.75504
BRN	c004	2514	Maize and products	Cereals	tonnes	2.25972	0.773688
BRN	c005	2515	Rye and products	Cereals	tonnes	2.57538	0.744989
BRN	c006	2516	Oats	Cereals	tonnes	2.08228	0.764188
BRN	c007	2517	Millet and products	Cereals	tonnes	3.40921	0.774533
BRN	c008	2518	Sorghum and products	Cereals	tonnes	1.89055	0.758533
BRN	c009	2520	Cereals, Other	Cereals	tonnes	2.35193	0.767356
BRN	c010	2531	Potatoes and products	Roots and tubers	tonnes	0.616542	0.853433
BRN	c011	2532	Cassava and products	Roots and tubers	tonnes	1.01385	0.880478
BRN	c013	2534	Roots, Other	Roots and tubers	tonnes	0.963559	0.867573
BRN	c014	2535	Yams	Roots and tubers	tonnes	0.90566	0.881852
BRN	c012	2533	Sweet potatoes	Roots and tubers	tonnes	0.939046	0.860459
BRN	c031	2601	Tomatoes and products	Vegetables, fruit, nuts, pulses, spices	tonnes	0.138896	0.810407
BRN	c032	2602	Onions	Vegetables, fruit, nuts, pulses, spices	tonnes	0.370477	0.810116
BRN	c033	2605	Vegetables, Other	Vegetables, fruit, nuts, pulses, spices	tonnes	0.255019	0.810407
BRN	c049	2640	Pepper	Vegetables, fruit, nuts, pulses, spices	tonnes	2.67548	0.809098
BRN	c050	2641	Pimento	Vegetables, fruit, nuts, pulses, spices	tonnes	2.82459	0.803525
BRN	c051	2642	Cloves	Vegetables, fruit, nuts, pulses, spices	tonnes	2.29486	0.824048
BRN	c052	2645	Spices, Other	Vegetables, fruit, nuts, pulses, spices	tonnes	2.31812	0.810407
BRN	c034	2611	Oranges, Mandarines	Vegetables, fruit, nuts, pulses, spices	tonnes	0.220961	0.810407
BRN	c035	2612	Lemons, Limes and products	Vegetables, fruit, nuts, pulses, spices	tonnes	0.239694	0.810407
BRN	c036	2613	Grapefruit and products	Vegetables, fruit, nuts, pulses, spices	tonnes	0.219877	0.809098
BRN	c037	2614	Citrus, Other	Vegetables, fruit, nuts, pulses, spices	tonnes	0.729233	0.809432
BRN	c038	2615	Bananas	Vegetables, fruit, nuts, pulses, spices	tonnes	0.649658	0.810845
BRN	c039	2616	Plantains	Vegetables, fruit, nuts, pulses, spices	tonnes	0.740604	0.807976
BRN	c040	2617	Apples and products	Vegetables, fruit, nuts, pulses, spices	tonnes	0.356945	0.810407
BRN	c041	2618	Pineapples and products	Vegetables, fruit, nuts, pulses, spices	tonnes	0.169765	0.810407
BRN	c042	2619	Dates	Vegetables, fruit, nuts, pulses, spices	tonnes	1.83727	0.804114
BRN	c043	2620	Grapes and products (excl wine)	Vegetables, fruit, nuts, pulses, spices	tonnes	0.652577	0.810407
BRN	c044	2625	Fruits, Other	Vegetables, fruit, nuts, pulses, spices	tonnes	0.521483	0.810407
BRN	c109	2848	Milk - Excluding Butter	Milk	tonnes	0.846602	0.909419
BRN	c110	2740	Butter, Ghee	Milk	tonnes	7.39982	0.909419
BRN	c113	2731	Bovine Meat	Meat	tonnes	1.45907	0.863444
BRN	c114	2732	Mutton & Goat Meat	Meat	tonnes	2.09686	0.863444
BRN	c115	2733	Pigmeat	Meat	tonnes	1.81482	0.862835
BRN	c017	2546	Beans	Vegetables, fruit, nuts, pulses, spices	tonnes	3.10254	0.953092
BRN	c018	2547	Peas	Vegetables, fruit, nuts, pulses, spices	tonnes	2.54484	0.953145
BRN	c019	2549	Pulses, Other and products	Vegetables, fruit, nuts, pulses, spices	tonnes	3.35803	0.952993
BRN	c020	2551	Nuts and products	Vegetables, fruit, nuts, pulses, spices	tonnes	1.12838	0.952945
BRN	c021	2555	Soyabeans	Oil crops	tonnes	3.91378	0.952945
BRN	c022	2552	Groundnuts	Oil crops	tonnes	2.31295	0.952945
BRN	c023	2557	Sunflower seed	Oil crops	tonnes	4.42939	0.954313
BRN	c026	2560	Coconuts - Incl Copra	Oil crops	tonnes	0.979304	0.952945
BRN	c027	2561	Sesame seed	Oil crops	tonnes	5.74824	0.9529
BRN	c030	2570	Oilcrops, Other	Oil crops	tonnes	2.84212	0.952139
BRN	c111	2744	Eggs	Eggs	tonnes	1.23756	0.893171
BRN	c116	2734	Poultry Meat	Meat	tonnes	1.36075	0.863444
BRN	c123	2960	Fish, Seafood	Fish	tonnes	0.638228	0.864414
BRN	c074	2577	Palm Oil	Vegetable oils	tonnes	6.30756	0.954844
BRN	c068	2571	Soyabean Oil	Vegetable oils	tonnes	7.25028	0.953042
BRN	c069	2572	Groundnut Oil	Vegetable oils	tonnes	8.52514	0.95265
BRN	c070	2573	Sunflowerseed Oil	Vegetable oils	tonnes	6.72404	0.9526
BRN	c071	2574	Rape and Mustard Oil	Vegetable oils	tonnes	6.42825	0.952013
BRN	c072	2575	Cottonseed Oil	Vegetable oils	tonnes	8.70352	0.953733
BRN	c073	2576	Palmkernel Oil	Vegetable oils	tonnes	8.36406	0.954844
BRN	c075	2578	Coconut Oil	Vegetable oils	tonnes	6.18122	0.9544
BRN	c076	2579	Sesameseed Oil	Vegetable oils	tonnes	8.49291	0.95343
BRN	c077	2580	Olive Oil	Vegetable oils	tonnes	8.82535	0.952945
BRN	c078	2581	Ricebran Oil	Vegetable oils	tonnes	6.50714	0.9504
BRN	c079	2582	Maize Germ Oil	Vegetable oils	tonnes	8.82683	0.953092
BRN	c080	2586	Oilcrops Oil, Other	Vegetable oils	tonnes	7.12637	0.952945
BRN	c119	2737	Fats, Animals, Raw	Animal fats	tonnes	6.15674	0.863444
BRN	c015	2536	Sugar cane	Sugar crops	tonnes	0.304086	1
BRN	c016	2537	Sugar beet	Sugar crops	tonnes	0.558859	1
BRN	c065	2541	Sugar non-centrifugal	Sugar, sweeteners	tonnes	4.41786	0.94335
BRN	c066	2542	Sugar (Raw Equivalent)	Sugar, sweeteners	tonnes	3.48831	0.94335
BRN	c067	2543	Sweeteners, Other	Sugar, sweeteners	tonnes	0.738371	0.94335
BRN	c121	2745	Honey	Honey	tonnes	3.25138	0.94335
BRN	c045	2630	Coffee and products	Coffee, tea, cocoa	tonnes	0.315492	1
BRN	c046	2633	Cocoa Beans and products	Coffee, tea, cocoa	tonnes	6.53708	1
BRN	c047	2635	Tea (including mate)	Coffee, tea, cocoa	tonnes	0.12218	1
BRN	c090	2655	Wine	Alcohol	tonnes	0.754658	1
BRN	c091	2656	Beer	Alcohol	tonnes	0.439059	1
BRN	c092	2657	Beverages, Fermented	Alcohol	tonnes	0.682807	1
BRN	c093	2658	Beverages, Alcoholic	Alcohol	tonnes	2.78733	1
BRN	c117	2735	Meat, Other	Meat	tonnes	1.52725	0.863444
BRN	c118	2736	Offals, Edible	Meat	tonnes	1.298	0.863444
BRN	c024	2558	Rape and Mustardseed	Oil crops	tonnes	1.20196	0.951511
BRN	c025	328	Seed cotton	Oil crops	tonnes		1
BRN	c028	254	Oil, palm fruit	Oil crops	tonnes		1
BRN	c029	2563	Olives (including preserved)	Oil crops	tonnes	0.777446	0.952664
BRN	c048	677	Hops	Vegetables, fruit, nuts, pulses, spices	tonnes		1
BRN	c053	2662	Jute	Fibre crops	tonnes		1
BRN	c054	2663	Jute-Like Fibres	Fibre crops	tonnes		1
BRN	c055	2664	Soft-Fibres, Other	Fibre crops	tonnes		1
BRN	c056	2665	Sisal	Fibre crops	tonnes		1
BRN	c057	2666	Abaca	Fibre crops	tonnes		1
BRN	c058	2667	Hard Fibres, Other	Fibre crops	tonnes		1
BRN	c059	2671	Tobacco	Tobacco, rubber	tonnes		1
BRN	c060	2672	Rubber	Tobacco, rubber	tonnes		1
BRN	c061	2000	Fodder crops	Fodder crops	tonnes		1
BRN	c062	2001	Grazing	Grazing	tonnes		1
BRN	c063	2559	Cottonseed	Fibre crops	tonnes	4.90679	1
BRN	c064	2562	Palm kernels	Oil crops	tonnes		1
BRN	c081	2590	Soyabean Cake	Oil cakes	tonnes		1
BRN	c082	2591	Groundnut Cake	Oil cakes	tonnes		1
BRN	c083	2592	Sunflowerseed Cake	Oil cakes	tonnes		1
BRN	c084	2593	Rape and Mustard Cake	Oil cakes	tonnes		1
BRN	c085	2594	Cottonseed Cake	Oil cakes	tonnes		1
BRN	c086	2595	Palmkernel Cake	Oil cakes	tonnes		1
BRN	c087	2596	Copra Cake	Oil cakes	tonnes		1
BRN	c088	2597	Sesameseed Cake	Oil cakes	tonnes		1
BRN	c089	2598	Oilseed Cakes, Other	Oil cakes	tonnes		1
BRN	c094	2659	Alcohol, Non-Food	Ethanol	tonnes		1
BRN	c095	2661	Cotton lint	Fibre crops	tonnes		1
BRN	c096	866	Cattle	Live animals	1000 Head		1
BRN	c097	946	Buffaloes	Live animals	1000 Head		1
BRN	c098	976	Sheep	Live animals	1000 Head		1
BRN	c099	1016	Goats	Live animals	1000 Head		1
BRN	c100	1034	Pigs	Live animals	1000 Head		1
BRN	c101	2029	Poultry Birds	Live animals	1000 Head		1
BRN	c102	1096	Horses	Live animals	1000 Head		1
BRN	c103	1107	Asses	Live animals	1000 Head		1
BRN	c104	1110	Mules	Live animals	1000 Head		1
BRN	c105	1126	Camels	Live animals	1000 Head		1
BRN	c106	1157	Camelids, other	Live animals	1000 Head		1
BRN	c107	1140	Rabbits and hares	Live animals	1000 Head		1
BRN	c108	1150	Rodents, other	Live animals	1000 Head		1
BRN	c112	2746	Wool (Clean Eq.)	Hides, skins, wool	tonnes		1
BRN	c120	2748	Hides and skins	Hides, skins, wool	tonnes		1
BRN	c122	2747	Silk	Hides, skins, wool	tonnes		1
CAN	c001	2807	Rice and products	Cereals	tonnes	2.29014	0.7154
CAN	c002	2511	Wheat and products	Cereals	tonnes	2.38134	0.7154
CAN	c003	2513	Barley and products	Cereals	tonnes	0.42331	0.7154
CAN	c004	2514	Maize and products	Cereals	tonnes	2.26893	0.7154
CAN	c005	2515	Rye and products	Cereals	tonnes	1.85908	0.7154
CAN	c006	2516	Oats	Cereals	tonnes	2.72258	0.7154
CAN	c007	2517	Millet and products	Cereals	tonnes	3.40921	0.774533
CAN	c008	2518	Sorghum and products	Cereals	tonnes	1.89055	0.758533
CAN	c009	2520	Cereals, Other	Cereals	tonnes	3.5942	0.7154
CAN	c010	2531	Potatoes and products	Roots and tubers	tonnes	0.652248	0.798898
CAN	c011	2532	Cassava and products	Roots and tubers	tonnes	3.62859	0.798898
CAN	c013	2534	Roots, Other	Roots and tubers	tonnes	0.878477	0.798898
CAN	c014	2535	Yams	Roots and tubers	tonnes	0.882091	0.881852
CAN	c012	2533	Sweet potatoes	Roots and tubers	tonnes	0.977643	0.798898
CAN	c031	2601	Tomatoes and products	Vegetables, fruit, nuts, pulses, spices	tonnes	0.201617	0.78264
CAN	c032	2602	Onions	Vegetables, fruit, nuts, pulses, spices	tonnes	0.389652	0.78264
CAN	c033	2605	Vegetables, Other	Vegetables, fruit, nuts, pulses, spices	tonnes	0.260839	0.78264
CAN	c049	2640	Pepper	Vegetables, fruit, nuts, pulses, spices	tonnes	3.05496	0.78264
CAN	c050	2641	Pimento	Vegetables, fruit, nuts, pulses, spices	tonnes	3.04764	0.78264
CAN	c051	2642	Cloves	Vegetables, fruit, nuts, pulses, spices	tonnes	2.29486	0.78264
CAN	c052	2645	Spices, Other	Vegetables, fruit, nuts, pulses, spices	tonnes	2.48882	0.78264
CAN	c034	2611	Oranges, Mandarines	Vegetables, fruit, nuts, pulses, spices	tonnes	0.14897	0.78264
CAN	c035	2612	Lemons, Limes and products	Vegetables, fruit, nuts, pulses, spices	tonnes	0.274515	0.78264
CAN	c036	2613	Grapefruit and products	Vegetables, fruit, nuts, pulses, spices	tonnes	0.217614	0.78264
CAN	c037	2614	Citrus, Other	Vegetables, fruit, nuts, pulses, spices	tonnes	1.50691	0.78264
CAN	c038	2615	Bananas	Vegetables, fruit, nuts, pulses, spices	tonnes	0.654242	0.78264
CAN	c039	2616	Plantains	Vegetables, fruit, nuts, pulses, spices	tonnes	0.726165	0.807976
CAN	c040	2617	Apples and products	Vegetables, fruit, nuts, pulses, spices	tonnes	0.414846	0.78264
CAN	c041	2618	Pineapples and products	Vegetables, fruit, nuts, pulses, spices	tonnes	0.187795	0.78264
CAN	c042	2619	Dates	Vegetables, fruit, nuts, pulses, spices	tonnes	2.01227	0.78264
CAN	c043	2620	Grapes and products (excl wine)	Vegetables, fruit, nuts, pulses, spices	tonnes	0.676116	0.78264
CAN	c044	2625	Fruits, Other	Vegetables, fruit, nuts, pulses, spices	tonnes	0.564151	0.78264
CAN	c109	2848	Milk - Excluding Butter	Milk	tonnes	0.560457	0.84575
CAN	c110	2740	Butter, Ghee	Milk	tonnes	7.42064	0.84575
CAN	c113	2731	Bovine Meat	Meat	tonnes	1.34509	0.8544
CAN	c114	2732	Mutton & Goat Meat	Meat	tonnes	2.17068	0.8544
CAN	c115	2733	Pigmeat	Meat	tonnes	1.64424	0.8544
CAN	c017	2546	Beans	Vegetables, fruit, nuts, pulses, spices	tonnes	3.13134	0.9504
CAN	c018	2547	Peas	Vegetables, fruit, nuts, pulses, spices	tonnes	0.570117	0.9504
CAN	c019	2549	Pulses, Other and products	Vegetables, fruit, nuts, pulses, spices	tonnes	3.3455	0.9504
CAN	c020	2551	Nuts and products	Vegetables, fruit, nuts, pulses, spices	tonnes	0.839735	0.9504
CAN	c021	2555	Soyabeans	Oil crops	tonnes	3.78149	0.9504
CAN	c022	2552	Groundnuts	Oil crops	tonnes	3.29825	0.9504
CAN	c023	2557	Sunflower seed	Oil crops	tonnes	4.42939	0.954313
CAN	c026	2560	Coconuts - Incl Copra	Oil crops	tonnes	1.20423	0.9504
CAN	c027	2561	Sesame seed	Oil crops	tonnes	5.96284	0.9504
CAN	c030	2570	Oilcrops, Other	Oil crops	tonnes	7.04278	0.9504
CAN	c111	2744	Eggs	Eggs	tonnes	1.2718	0.833
CAN	c116	2734	Poultry Meat	Meat	tonnes	1.3573	0.8544
CAN	c123	2960	Fish, Seafood	Fish	tonnes	0.555339	0.845188
CAN	c074	2577	Palm Oil	Vegetable oils	tonnes	6.30756	0.954844
CAN	c068	2571	Soyabean Oil	Vegetable oils	tonnes	0.864337	0.9504
CAN	c069	2572	Groundnut Oil	Vegetable oils	tonnes	10.3363	0.9504
CAN	c070	2573	Sunflowerseed Oil	Vegetable oils	tonnes	4.74513	0.9504
CAN	c071	2574	Rape and Mustard Oil	Vegetable oils	tonnes	5.3592	0.9504
CAN	c072	2575	Cottonseed Oil	Vegetable oils	tonnes	0.850017	0.9504
CAN	c073	2576	Palmkernel Oil	Vegetable oils	tonnes	8.36406	0.954844
CAN	c075	2578	Coconut Oil	Vegetable oils	tonnes	8.30962	0.9544
CAN	c076	2579	Sesameseed Oil	Vegetable oils	tonnes	8.49291	0.95343
CAN	c077	2580	Olive Oil	Vegetable oils	tonnes	8.84936	0.9504
CAN	c078	2581	Ricebran Oil	Vegetable oils	tonnes	6.50714	0.9504
CAN	c079	2582	Maize Germ Oil	Vegetable oils	tonnes	7.34033	0.9504
CAN	c080	2586	Oilcrops Oil, Other	Vegetable oils	tonnes	8.26765	0.9504
CAN	c119	2737	Fats, Animals, Raw	Animal fats	tonnes	8.32508	0.8544
CAN	c015	2536	Sugar cane	Sugar crops	tonnes	0.304086	1
CAN	c016	2537	Sugar beet	Sugar crops	tonnes	0.558859	1
CAN	c065	2541	Sugar non-centrifugal	Sugar, sweeteners	tonnes	4.41786	0.94335
CAN	c066	2542	Sugar (Raw Equivalent)	Sugar, sweeteners	tonnes	3.87933	0.94335
CAN	c067	2543	Sweeteners, Other	Sugar, sweeteners	tonnes	0.801188	0.94335
CAN	c121	2745	Honey	Honey	tonnes	3.30742	0.94335
CAN	c045	2630	Coffee and products	Coffee, tea, cocoa	tonnes	0.760664	1
CAN	c046	2633	Cocoa Beans and products	Coffee, tea, cocoa	tonnes	1.67907	1
CAN	c047	2635	Tea (including mate)	Coffee, tea, cocoa	tonnes	0.0344522	1
CAN	c090	2655	Wine	Alcohol	tonnes	0.788518	1
CAN	c091	2656	Beer	Alcohol	tonnes	0.438545	1
CAN	c092	2657	Beverages, Fermented	Alcohol	tonnes	0.334335	1
CAN	c093	2658	Beverages, Alcoholic	Alcohol	tonnes	2.79104	1
CAN	c117	2735	Meat, Other	Meat	tonnes	1.69628	0.8544
CAN	c118	2736	Offals, Edible	Meat	tonnes	0.608999	0.8544
CAN	c024	2558	Rape and Mustardseed	Oil crops	tonnes	4.5127	0.9504
CAN	c025	328	Seed cotton	Oil crops	tonnes		1
CAN	c028	254	Oil, palm fruit	Oil crops	tonnes		1
CAN	c029	2563	Olives (including preserved)	Oil crops	tonnes	1.31361	0.9504
CAN	c048	677	Hops	Vegetables, fruit, nuts, pulses, spices	tonnes		1
CAN	c053	2662	Jute	Fibre crops	tonnes		1
CAN	c054	2663	Jute-Like Fibres	Fibre crops	tonnes		1
CAN	c055	2664	Soft-Fibres, Other	Fibre crops	tonnes		1
CAN	c056	2665	Sisal	Fibre crops	tonnes		1
CAN	c057	2666	Abaca	Fibre crops	tonnes		1
CAN	c058	2667	Hard Fibres, Other	Fibre crops	tonnes		1
CAN	c059	2671	Tobacco	Tobacco, rubber	tonnes		1
CAN	c060	2672	Rubber	Tobacco, rubber	tonnes		1
CAN	c061	2000	Fodder crops	Fodder crops	tonnes		1
CAN	c062	2001	Grazing	Grazing	tonnes		1
CAN	c063	2559	Cottonseed	Fibre crops	tonnes	4.90679	1
CAN	c064	2562	Palm kernels	Oil crops	tonnes		1
CAN	c081	2590	Soyabean Cake	Oil cakes	tonnes		1
CAN	c082	2591	Groundnut Cake	Oil cakes	tonnes		1
CAN	c083	2592	Sunflowerseed Cake	Oil cakes	tonnes		1
CAN	c084	2593	Rape and Mustard Cake	Oil cakes	tonnes		1
CAN	c085	2594	Cottonseed Cake	Oil cakes	tonnes		1
CAN	c086	2595	Palmkernel Cake	Oil cakes	tonnes		1
CAN	c087	2596	Copra Cake	Oil cakes	tonnes		1
CAN	c088	2597	Sesameseed Cake	Oil cakes	tonnes		1
CAN	c089	2598	Oilseed Cakes, Other	Oil cakes	tonnes		1
CAN	c094	2659	Alcohol, Non-Food	Ethanol	tonnes		1
CAN	c095	2661	Cotton lint	Fibre crops	tonnes		1
CAN	c096	866	Cattle	Live animals	1000 Head		1
CAN	c097	946	Buffaloes	Live animals	1000 Head		1
CAN	c098	976	Sheep	Live animals	1000 Head		1
CAN	c099	1016	Goats	Live animals	1000 Head		1
CAN	c100	1034	Pigs	Live animals	1000 Head		1
CAN	c101	2029	Poultry Birds	Live animals	1000 Head		1
CAN	c102	1096	Horses	Live animals	1000 Head		1
CAN	c103	1107	Asses	Live animals	1000 Head		1
CAN	c104	1110	Mules	Live animals	1000 Head		1
CAN	c105	1126	Camels	Live animals	1000 Head		1
CAN	c106	1157	Camelids, other	Live animals	1000 Head		1
CAN	c107	1140	Rabbits and hares	Live animals	1000 Head		1
CAN	c108	1150	Rodents, other	Live animals	1000 Head		1
CAN	c112	2746	Wool (Clean Eq.)	Hides, skins, wool	tonnes		1
CAN	c120	2748	Hides and skins	Hides, skins, wool	tonnes		1
CAN	c122	2747	Silk	Hides, skins, wool	tonnes		1
CHL	c001	2807	Rice and products	Cereals	tonnes	2.26088	0.864
CHL	c002	2511	Wheat and products	Cereals	tonnes	2.75974	0.864
CHL	c003	2513	Barley and products	Cereals	tonnes	2.78044	0.864
CHL	c004	2514	Maize and products	Cereals	tonnes	3.33771	0.864
CHL	c005	2515	Rye and products	Cereals	tonnes	2.54128	0.864
CHL	c006	2516	Oats	Cereals	tonnes	1.91747	0.864
CHL	c007	2517	Millet and products	Cereals	tonnes	3.40921	0.774533
CHL	c008	2518	Sorghum and products	Cereals	tonnes	1.89055	0.758533
CHL	c009	2520	Cereals, Other	Cereals	tonnes	3.64114	0.864
CHL	c010	2531	Potatoes and products	Roots and tubers	tonnes	0.634105	0.94672
CHL	c011	2532	Cassava and products	Roots and tubers	tonnes	3.64543	0.94672
CHL	c013	2534	Roots, Other	Roots and tubers	tonnes	0.963559	0.867573
CHL	c014	2535	Yams	Roots and tubers	tonnes	0.90566	0.881852
CHL	c012	2533	Sweet potatoes	Roots and tubers	tonnes	0.976853	0.94672
CHL	c031	2601	Tomatoes and products	Vegetables, fruit, nuts, pulses, spices	tonnes	0.203315	0.8811
CHL	c032	2602	Onions	Vegetables, fruit, nuts, pulses, spices	tonnes	0.389379	0.8811
CHL	c033	2605	Vegetables, Other	Vegetables, fruit, nuts, pulses, spices	tonnes	0.300469	0.8811
CHL	c049	2640	Pepper	Vegetables, fruit, nuts, pulses, spices	tonnes	2.31576	0.8811
CHL	c050	2641	Pimento	Vegetables, fruit, nuts, pulses, spices	tonnes	2.52376	0.803525
CHL	c051	2642	Cloves	Vegetables, fruit, nuts, pulses, spices	tonnes	2.29486	0.824048
CHL	c052	2645	Spices, Other	Vegetables, fruit, nuts, pulses, spices	tonnes	2.38415	0.8811
CHL	c034	2611	Oranges, Mandarines	Vegetables, fruit, nuts, pulses, spices	tonnes	0.223267	0.8811
CHL	c035	2612	Lemons, Limes and products	Vegetables, fruit, nuts, pulses, spices	tonnes	0.301721	0.8811
CHL	c036	2613	Grapefruit and products	Vegetables, fruit, nuts, pulses, spices	tonnes	0.219877	0.809098
CHL	c037	2614	Citrus, Other	Vegetables, fruit, nuts, pulses, spices	tonnes	0.91227	0.8811
CHL	c038	2615	Bananas	Vegetables, fruit, nuts, pulses, spices	tonnes	0.657643	0.8811
CHL	c039	2616	Plantains	Vegetables, fruit, nuts, pulses, spices	tonnes	0.736055	0.807976
CHL	c040	2617	Apples and products	Vegetables, fruit, nuts, pulses, spices	tonnes	0.337966	0.8811
CHL	c041	2618	Pineapples and products	Vegetables, fruit, nuts, pulses, spices	tonnes	0.132057	0.8811
CHL	c042	2619	Dates	Vegetables, fruit, nuts, pulses, spices	tonnes	1.83727	0.804114
CHL	c043	2620	Grapes and products (excl wine)	Vegetables, fruit, nuts, pulses, spices	tonnes	0.633583	0.8811
CHL	c044	2625	Fruits, Other	Vegetables, fruit, nuts, pulses, spices	tonnes	0.637145	0.8811
CHL	c109	2848	Milk - Excluding Butter	Milk	tonnes	0.800299	0.8832
CHL	c110	2740	Butter, Ghee	Milk	tonnes	7.37393	0.8832
CHL	c113	2731	Bovine Meat	Meat	tonnes	1.56897	0.893
CHL	c114	2732	Mutton & Goat Meat	Meat	tonnes	1.52477	0.893
CHL	c115	2733	Pigmeat	Meat	tonnes	2.14636	0.893
CHL	c017	2546	Beans	Vegetables, fruit, nuts, pulses, spices	tonnes	3.16593	0.9604
CHL	c018	2547	Peas	Vegetables, fruit, nuts, pulses, spices	tonnes	3.31673	0.9604
CHL	c019	2549	Pulses, Other and products	Vegetables, fruit, nuts, pulses, spices	tonnes	3.33726	0.9604
CHL	c020	2551	Nuts and products	Vegetables, fruit, nuts, pulses, spices	tonnes	3.38713	0.9604
CHL	c021	2555	Soyabeans	Oil crops	tonnes	3.36838	0.9604
CHL	c022	2552	Groundnuts	Oil crops	tonnes	1.8098	0.9604
CHL	c023	2557	Sunflower seed	Oil crops	tonnes	4.42939	0.954313
CHL	c026	2560	Coconuts - Incl Copra	Oil crops	tonnes	1.27463	0.9604
CHL	c027	2561	Sesame seed	Oil crops	tonnes	5.74824	0.9604
CHL	c030	2570	Oilcrops, Other	Oil crops	tonnes	2.84212	0.952139
CHL	c111	2744	Eggs	Eggs	tonnes	1.22449	0.9216
CHL	c116	2734	Poultry Meat	Meat	tonnes	1.35881	0.893
CHL	c123	2960	Fish, Seafood	Fish	tonnes	0.556944	0.8908
CHL	c074	2577	Palm Oil	Vegetable oils	tonnes	6.30756	0.954844
CHL	c068	2571	Soyabean Oil	Vegetable oils	tonnes	5.00518	0.9604
CHL	c069	2572	Groundnut Oil	Vegetable oils	tonnes	8.52514	0.95265
CHL	c070	2573	Sunflowerseed Oil	Vegetable oils	tonnes	2.75291	0.9604
CHL	c071	2574	Rape and Mustard Oil	Vegetable oils	tonnes	4.83023	0.9604
CHL	c072	2575	Cottonseed Oil	Vegetable oils	tonnes	8.70352	0.953733
CHL	c073	2576	Palmkernel Oil	Vegetable oils	tonnes	8.36406	0.954844
CHL	c075	2578	Coconut Oil	Vegetable oils	tonnes	6.18122	0.9544
CHL	c076	2579	Sesameseed Oil	Vegetable oils	tonnes	8.49291	0.95343
CHL	c077	2580	Olive Oil	Vegetable oils	tonnes	8.92079	0.9604
CHL	c078	2581	Ricebran Oil	Vegetable oils	tonnes	6.50714	0.9504
CHL	c079	2582	Maize Germ Oil	Vegetable oils	tonnes	11.3456	0.9604
CHL	c080	2586	Oilcrops Oil, Other	Vegetable oils	tonnes	7.46101	0.9604
CHL	c119	2737	Fats, Animals, Raw	Animal fats	tonnes	5.86811	0.893
CHL	c015	2536	Sugar cane	Sugar crops	tonnes	0.304086	1
CHL	c016	2537	Sugar beet	Sugar crops	tonnes	0.558859	1
CHL	c065	2541	Sugar non-centrifugal	Sugar, sweeteners	tonnes	4.41786	0.94335
CHL	c066	2542	Sugar (Raw Equivalent)	Sugar, sweeteners	tonnes	3.65628	0.94335
CHL	c067	2543	Sweeteners, Other	Sugar, sweeteners	tonnes	1.78618	0.94335
CHL	c121	2745	Honey	Honey	tonnes	3.14468	0.94335
CHL	c045	2630	Coffee and products	Coffee, tea, cocoa	tonnes	0.801193	1
CHL	c046	2633	Cocoa Beans and products	Coffee, tea, cocoa	tonnes	4.38718	1
CHL	c047	2635	Tea (including mate)	Coffee, tea, cocoa	tonnes	0.0560947	1
CHL	c090	2655	Wine	Alcohol	tonnes	0.798234	1
CHL	c091	2656	Beer	Alcohol	tonnes	0.437834	1
CHL	c092	2657	Beverages, Fermented	Alcohol	tonnes	0.349822	1
CHL	c093	2658	Beverages, Alcoholic	Alcohol	tonnes	2.82609	1
CHL	c117	2735	Meat, Other	Meat	tonnes	2.55005	0.893
CHL	c118	2736	Offals, Edible	Meat	tonnes	0.432311	0.893
CHL	c024	2558	Rape and Mustardseed	Oil crops	tonnes	1.02888	0.951511
CHL	c025	328	Seed cotton	Oil crops	tonnes		1
CHL	c028	254	Oil, palm fruit	Oil crops	tonnes		1
CHL	c029	2563	Olives (including preserved)	Oil crops	tonnes	1.3344	0.9604
CHL	c048	677	Hops	Vegetables, fruit, nuts, pulses, spices	tonnes		1
CHL	c053	2662	Jute	Fibre crops	tonnes		1
CHL	c054	2663	Jute-Like Fibres	Fibre crops	tonnes		1
CHL	c055	2664	Soft-Fibres, Other	Fibre crops	tonnes		1
CHL	c056	2665	Sisal	Fibre crops	tonnes		1
CHL	c057	2666	Abaca	Fibre crops	tonnes		1
CHL	c058	2667	Hard Fibres, Other	Fibre crops	tonnes		1
CHL	c059	2671	Tobacco	Tobacco, rubber	tonnes		1
CHL	c060	2672	Rubber	Tobacco, rubber	tonnes		1
CHL	c061	2000	Fodder crops	Fodder crops	tonnes		1
CHL	c062	2001	Grazing	Grazing	tonnes		1
CHL	c063	2559	Cottonseed	Fibre crops	tonnes	4.90679	1
CHL	c064	2562	Palm kernels	Oil crops	tonnes		1
CHL	c081	2590	Soyabean Cake	Oil cakes	tonnes		1
CHL	c082	2591	Groundnut Cake	Oil cakes	tonnes		1
CHL	c083	2592	Sunflowerseed Cake	Oil cakes	tonnes		1
CHL	c084	2593	Rape and Mustard Cake	Oil cakes	tonnes		1
CHL	c085	2594	Cottonseed Cake	Oil cakes	tonnes		1
CHL	c086	2595	Palmkernel Cake	Oil cakes	tonnes		1
CHL	c087	2596	Copra Cake	Oil cakes	tonnes		1
CHL	c088	2597	Sesameseed Cake	Oil cakes	tonnes		1
CHL	c089	2598	Oilseed Cakes, Other	Oil cakes	tonnes		1
CHL	c094	2659	Alcohol, Non-Food	Ethanol	tonnes		1
CHL	c095	2661	Cotton lint	Fibre crops	tonnes		1
CHL	c096	866	Cattle	Live animals	1000 Head		1
CHL	c097	946	Buffaloes	Live animals	1000 Head		1
CHL	c098	976	Sheep	Live animals	1000 Head		1
CHL	c099	1016	Goats	Live animals	1000 Head		1
CHL	c100	1034	Pigs	Live animals	1000 Head		1
CHL	c101	2029	Poultry Birds	Live animals	1000 Head		1
CHL	c102	1096	Horses	Live animals	1000 Head		1
CHL	c103	1107	Asses	Live animals	1000 Head		1
CHL	c104	1110	Mules	Live animals	1000 Head		1
CHL	c105	1126	Camels	Live animals	1000 Head		1
CHL	c106	1157	Camelids, other	Live animals	1000 Head		1
CHL	c107	1140	Rabbits and hares	Live animals	1000 Head		1
CHL	c108	1150	Rodents, other	Live animals	1000 Head		1
CHL	c112	2746	Wool (Clean Eq.)	Hides, skins, wool	tonnes		1
CHL	c120	2748	Hides and skins	Hides, skins, wool	tonnes		1
CHL	c122	2747	Silk	Hides, skins, wool	tonnes		1
CYP	c001	2807	Rice and products	Cereals	tonnes	2.43527	0.735
CYP	c002	2511	Wheat and products	Cereals	tonnes	2.39898	0.735
CYP	c003	2513	Barley and products	Cereals	tonnes	2.76024	0.735
CYP	c004	2514	Maize and products	Cereals	tonnes	3.40891	0.735
CYP	c005	2515	Rye and products	Cereals	tonnes	2.57538	0.735
CYP	c006	2516	Oats	Cereals	tonnes	2.08228	0.735
CYP	c007	2517	Millet and products	Cereals	tonnes	3.40921	0.774533
CYP	c008	2518	Sorghum and products	Cereals	tonnes	1.89055	0.758533
CYP	c009	2520	Cereals, Other	Cereals	tonnes	3.0055	0.735
CYP	c010	2531	Potatoes and products	Roots and tubers	tonnes	0.582866	0.831541
CYP	c011	2532	Cassava and products	Roots and tubers	tonnes	1.01385	0.880478
CYP	c013	2534	Roots, Other	Roots and tubers	tonnes	0.963559	0.831541
CYP	c014	2535	Yams	Roots and tubers	tonnes	0.90566	0.881852
CYP	c012	2533	Sweet potatoes	Roots and tubers	tonnes	0.939046	0.831541
CYP	c031	2601	Tomatoes and products	Vegetables, fruit, nuts, pulses, spices	tonnes	0.200088	0.7914
CYP	c032	2602	Onions	Vegetables, fruit, nuts, pulses, spices	tonnes	0.235559	0.7914
CYP	c033	2605	Vegetables, Other	Vegetables, fruit, nuts, pulses, spices	tonnes	0.305947	0.7914
CYP	c049	2640	Pepper	Vegetables, fruit, nuts, pulses, spices	tonnes	2.67548	0.7914
CYP	c050	2641	Pimento	Vegetables, fruit, nuts, pulses, spices	tonnes	2.82459	0.7914
CYP	c051	2642	Cloves	Vegetables, fruit, nuts, pulses, spices	tonnes	2.29486	0.824048
CYP	c052	2645	Spices, Other	Vegetables, fruit, nuts, pulses, spices	tonnes	1.81213	0.7914
CYP	c034	2611	Oranges, Mandarines	Vegetables, fruit, nuts, pulses, spices	tonnes	0.272899	0.7914
CYP	c035	2612	Lemons, Limes and products	Vegetables, fruit, nuts, pulses, spices	tonnes	0.270993	0.7914
CYP	c036	2613	Grapefruit and products	Vegetables, fruit, nuts, pulses, spices	tonnes	0.195893	0.7914
CYP	c037	2614	Citrus, Other	Vegetables, fruit, nuts, pulses, spices	tonnes	1.05377	0.7914
CYP	c038	2615	Bananas	Vegetables, fruit, nuts, pulses, spices	tonnes	0.633557	0.7914
CYP	c039	2616	Plantains	Vegetables, fruit, nuts, pulses, spices	tonnes	0.824102	0.7914
CYP	c040	2617	Apples and products	Vegetables, fruit, nuts, pulses, spices	tonnes	0.346476	0.7914
CYP	c041	2618	Pineapples and products	Vegetables, fruit, nuts, pulses, spices	tonnes	0.0729105	0.7914
CYP	c042	2619	Dates	Vegetables, fruit, nuts, pulses, spices	tonnes	1.83727	0.7914
CYP	c043	2620	Grapes and products (excl wine)	Vegetables, fruit, nuts, pulses, spices	tonnes	0.637793	0.7914
CYP	c044	2625	Fruits, Other	Vegetables, fruit, nuts, pulses, spices	tonnes	0.591002	0.7914
CYP	c109	2848	Milk - Excluding Butter	Milk	tonnes	0.781848	0.92535
CYP	c110	2740	Butter, Ghee	Milk	tonnes	7.23051	0.92535
CYP	c113	2731	Bovine Meat	Meat	tonnes	1.5343	0.8544
CYP	c114	2732	Mutton & Goat Meat	Meat	tonnes	1.8597	0.8544
CYP	c115	2733	Pigmeat	Meat	tonnes	1.47512	0.8544
CYP	c017	2546	Beans	Vegetables, fruit, nuts, pulses, spices	tonnes	3.69189	0.9504
CYP	c018	2547	Peas	Vegetables, fruit, nuts, pulses, spices	tonnes	2.54484	0.9504
CYP	c019	2549	Pulses, Other and products	Vegetables, fruit, nuts, pulses, spices	tonnes	3.81134	0.9504
CYP	c020	2551	Nuts and products	Vegetables, fruit, nuts, pulses, spices	tonnes	2.36465	0.9504
CYP	c021	2555	Soyabeans	Oil crops	tonnes	3.91378	0.9504
CYP	c022	2552	Groundnuts	Oil crops	tonnes	2.8215	0.9504
CYP	c023	2557	Sunflower seed	Oil crops	tonnes	4.42939	0.9504
CYP	c026	2560	Coconuts - Incl Copra	Oil crops	tonnes	0.979304	0.9504
CYP	c027	2561	Sesame seed	Oil crops	tonnes	4.56634	0.9504
CYP	c030	2570	Oilcrops, Other	Oil crops	tonnes	2.84212	0.952139
CYP	c111	2744	Eggs	Eggs	tonnes	1.24483	0.9016
CYP	c116	2734	Poultry Meat	Meat	tonnes	1.41406	0.8544
CYP	c123	2960	Fish, Seafood	Fish	tonnes	0.58771	0.853196
CYP	c074	2577	Palm Oil	Vegetable oils	tonnes	6.30756	0.954844
CYP	c068	2571	Soyabean Oil	Vegetable oils	tonnes	9.14313	0.9504
CYP	c069	2572	Groundnut Oil	Vegetable oils	tonnes	8.52514	0.9504
CYP	c070	2573	Sunflowerseed Oil	Vegetable oils	tonnes	9.08596	0.9504
CYP	c071	2574	Rape and Mustard Oil	Vegetable oils	tonnes	6.74142	0.9504
CYP	c072	2575	Cottonseed Oil	Vegetable oils	tonnes	8.70352	0.953733
CYP	c073	2576	Palmkernel Oil	Vegetable oils	tonnes	8.36406	0.954844
CYP	c075	2578	Coconut Oil	Vegetable oils	tonnes	6.18122	0.9544
CYP	c076	2579	Sesameseed Oil	Vegetable oils	tonnes	8.49291	0.9504
CYP	c077	2580	Olive Oil	Vegetable oils	tonnes	9.42324	0.9504
CYP	c078	2581	Ricebran Oil	Vegetable oils	tonnes	6.50714	0.9504
CYP	c079	2582	Maize Germ Oil	Vegetable oils	tonnes	4.67459	0.9504
CYP	c080	2586	Oilcrops Oil, Other	Vegetable oils	tonnes	7.12637	0.9504
CYP	c119	2737	Fats, Animals, Raw	Animal fats	tonnes	5.44185	0.8544
CYP	c015	2536	Sugar cane	Sugar crops	tonnes	0.304086	1
CYP	c016	2537	Sugar beet	Sugar crops	tonnes	0.558859	1
CYP	c065	2541	Sugar non-centrifugal	Sugar, sweeteners	tonnes	4.41786	0.94335
CYP	c066	2542	Sugar (Raw Equivalent)	Sugar, sweeteners	tonnes	3.61524	0.94335
CYP	c067	2543	Sweeteners, Other	Sugar, sweeteners	tonnes	0.427238	0.94335
CYP	c121	2745	Honey	Honey	tonnes	3.30965	0.94335
CYP	c045	2630	Coffee and products	Coffee, tea, cocoa	tonnes	0.35477	1
CYP	c046	2633	Cocoa Beans and products	Coffee, tea, cocoa	tonnes	8.96901	1
CYP	c047	2635	Tea (including mate)	Coffee, tea, cocoa	tonnes	0.12218	1
CYP	c090	2655	Wine	Alcohol	tonnes	0.78367	1
CYP	c091	2656	Beer	Alcohol	tonnes	0.44057	1
CYP	c092	2657	Beverages, Fermented	Alcohol	tonnes	0.44875	1
CYP	c093	2658	Beverages, Alcoholic	Alcohol	tonnes	2.75401	1
CYP	c117	2735	Meat, Other	Meat	tonnes	0.69801	0.8544
CYP	c118	2736	Offals, Edible	Meat	tonnes	1.00248	0.8544
CYP	c024	2558	Rape and Mustardseed	Oil crops	tonnes	0.649773	0.951511
CYP	c025	328	Seed cotton	Oil crops	tonnes		1
CYP	c028	254	Oil, palm fruit	Oil crops	tonnes		1
CYP	c029	2563	Olives (including preserved)	Oil crops	tonnes	1.70675	0.9504
CYP	c048	677	Hops	Vegetables, fruit, nuts, pulses, spices	tonnes		1
CYP	c053	2662	Jute	Fibre crops	tonnes		1
CYP	c054	2663	Jute-Like Fibres	Fibre crops	tonnes		1
CYP	c055	2664	Soft-Fibres, Other	Fibre crops	tonnes		1
CYP	c056	2665	Sisal	Fibre crops	tonnes		1
CYP	c057	2666	Abaca	Fibre crops	tonnes		1
CYP	c058	2667	Hard Fibres, Other	Fibre crops	tonnes		1
CYP	c059	2671	Tobacco	Tobacco, rubber	tonnes		1
CYP	c060	2672	Rubber	Tobacco, rubber	tonnes		1
CYP	c061	2000	Fodder crops	Fodder crops	tonnes		1
CYP	c062	2001	Grazing	Grazing	tonnes		1
CYP	c063	2559	Cottonseed	Fibre crops	tonnes	4.90679	1
CYP	c064	2562	Palm kernels	Oil crops	tonnes		1
CYP	c081	2590	Soyabean Cake	Oil cakes	tonnes		1
CYP	c082	2591	Groundnut Cake	Oil cakes	tonnes		1
CYP	c083	2592	Sunflowerseed Cake	Oil cakes	tonnes		1
CYP	c084	2593	Rape and Mustard Cake	Oil cakes	tonnes		1
CYP	c085	2594	Cottonseed Cake	Oil cakes	tonnes		1
CYP	c086	2595	Palmkernel Cake	Oil cakes	tonnes		1
CYP	c087	2596	Copra Cake	Oil cakes	tonnes		1
CYP	c088	2597	Sesameseed Cake	Oil cakes	tonnes		1
CYP	c089	2598	Oilseed Cakes, Other	Oil cakes	tonnes		1
CYP	c094	2659	Alcohol, Non-Food	Ethanol	tonnes		1
CYP	c095	2661	Cotton lint	Fibre crops	tonnes		1
CYP	c096	866	Cattle	Live animals	1000 Head		1
CYP	c097	946	Buffaloes	Live animals	1000 Head		1
CYP	c098	976	Sheep	Live animals	1000 Head		1
CYP	c099	1016	Goats	Live animals	1000 Head		1
CYP	c100	1034	Pigs	Live animals	1000 Head		1
CYP	c101	2029	Poultry Birds	Live animals	1000 Head		1
CYP	c102	1096	Horses	Live animals	1000 Head		1
CYP	c103	1107	Asses	Live animals	1000 Head		1
CYP	c104	1110	Mules	Live animals	1000 Head		1
CYP	c105	1126	Camels	Live animals	1000 Head		1
CYP	c106	1157	Camelids, other	Live animals	1000 Head		1
CYP	c107	1140	Rabbits and hares	Live animals	1000 Head		1
CYP	c108	1150	Rodents, other	Live animals	1000 Head		1
CYP	c112	2746	Wool (Clean Eq.)	Hides, skins, wool	tonnes		1
CYP	c120	2748	Hides and skins	Hides, skins, wool	tonnes		1
CYP	c122	2747	Silk	Hides, skins, wool	tonnes		1
DNK	c001	2807	Rice and products	Cereals	tonnes	1.93432	0.735
DNK	c002	2511	Wheat and products	Cereals	tonnes	2.52309	0.735
DNK	c003	2513	Barley and products	Cereals	tonnes	1.20842	0.735
DNK	c004	2514	Maize and products	Cereals	tonnes	2.47991	0.735
DNK	c005	2515	Rye and products	Cereals	tonnes	2.79539	0.735
DNK	c006	2516	Oats	Cereals	tonnes	2.21029	0.735
DNK	c007	2517	Millet and products	Cereals	tonnes	3.40921	0.774533
DNK	c008	2518	Sorghum and products	Cereals	tonnes	1.89055	0.758533
DNK	c009	2520	Cereals, Other	Cereals	tonnes	2.88447	0.767356
DNK	c010	2531	Potatoes and products	Roots and tubers	tonnes	0.6369	0.831541
DNK	c011	2532	Cassava and products	Roots and tubers	tonnes	1.01385	0.880478
DNK	c013	2534	Roots, Other	Roots and tubers	tonnes	0.963559	0.867573
DNK	c014	2535	Yams	Roots and tubers	tonnes	0.90566	0.881852
DNK	c012	2533	Sweet potatoes	Roots and tubers	tonnes	0.939046	0.860459
DNK	c031	2601	Tomatoes and products	Vegetables, fruit, nuts, pulses, spices	tonnes	0.102245	0.7914
DNK	c032	2602	Onions	Vegetables, fruit, nuts, pulses, spices	tonnes	0.392651	0.7914
DNK	c033	2605	Vegetables, Other	Vegetables, fruit, nuts, pulses, spices	tonnes	0.25541	0.7914
DNK	c049	2640	Pepper	Vegetables, fruit, nuts, pulses, spices	tonnes	2.54767	0.7914
DNK	c050	2641	Pimento	Vegetables, fruit, nuts, pulses, spices	tonnes	1.94931	0.7914
DNK	c051	2642	Cloves	Vegetables, fruit, nuts, pulses, spices	tonnes	2.29486	0.7914
DNK	c052	2645	Spices, Other	Vegetables, fruit, nuts, pulses, spices	tonnes	2.79893	0.7914
DNK	c034	2611	Oranges, Mandarines	Vegetables, fruit, nuts, pulses, spices	tonnes	0.180394	0.7914
DNK	c035	2612	Lemons, Limes and products	Vegetables, fruit, nuts, pulses, spices	tonnes	0.293943	0.7914
DNK	c036	2613	Grapefruit and products	Vegetables, fruit, nuts, pulses, spices	tonnes	0.233361	0.7914
DNK	c037	2614	Citrus, Other	Vegetables, fruit, nuts, pulses, spices	tonnes	0.763842	0.7914
DNK	c038	2615	Bananas	Vegetables, fruit, nuts, pulses, spices	tonnes	0.654469	0.7914
DNK	c039	2616	Plantains	Vegetables, fruit, nuts, pulses, spices	tonnes	0.740604	0.7914
DNK	c040	2617	Apples and products	Vegetables, fruit, nuts, pulses, spices	tonnes	0.210285	0.7914
DNK	c041	2618	Pineapples and products	Vegetables, fruit, nuts, pulses, spices	tonnes	0.11538	0.7914
DNK	c042	2619	Dates	Vegetables, fruit, nuts, pulses, spices	tonnes	2.10042	0.7914
DNK	c043	2620	Grapes and products (excl wine)	Vegetables, fruit, nuts, pulses, spices	tonnes	0.711324	0.7914
DNK	c044	2625	Fruits, Other	Vegetables, fruit, nuts, pulses, spices	tonnes	0.552222	0.7914
DNK	c109	2848	Milk - Excluding Butter	Milk	tonnes	0.848858	0.92535
DNK	c110	2740	Butter, Ghee	Milk	tonnes	7.36105	0.92535
DNK	c113	2731	Bovine Meat	Meat	tonnes	1.26389	0.8544
DNK	c114	2732	Mutton & Goat Meat	Meat	tonnes	2.14745	0.8544
DNK	c115	2733	Pigmeat	Meat	tonnes	2.09974	0.8544
DNK	c017	2546	Beans	Vegetables, fruit, nuts, pulses, spices	tonnes	2.80806	0.9504
DNK	c018	2547	Peas	Vegetables, fruit, nuts, pulses, spices	tonnes	3.40877	0.9504
DNK	c019	2549	Pulses, Other and products	Vegetables, fruit, nuts, pulses, spices	tonnes	4.45842	0.9504
DNK	c020	2551	Nuts and products	Vegetables, fruit, nuts, pulses, spices	tonnes	0.84172	0.9504
DNK	c021	2555	Soyabeans	Oil crops	tonnes	3.91378	0.9504
DNK	c022	2552	Groundnuts	Oil crops	tonnes	2.85638	0.9504
DNK	c023	2557	Sunflower seed	Oil crops	tonnes	4.42939	0.954313
DNK	c026	2560	Coconuts - Incl Copra	Oil crops	tonnes	1.27991	0.9504
DNK	c027	2561	Sesame seed	Oil crops	tonnes	5.74824	0.9529
DNK	c030	2570	Oilcrops, Other	Oil crops	tonnes	2.84212	0.952139
DNK	c111	2744	Eggs	Eggs	tonnes	1.39937	0.9016
DNK	c116	2734	Poultry Meat	Meat	tonnes	1.42607	0.8544
DNK	c123	2960	Fish, Seafood	Fish	tonnes	0.832836	0.853196
DNK	c074	2577	Palm Oil	Vegetable oils	tonnes	6.30756	0.954844
DNK	c068	2571	Soyabean Oil	Vegetable oils	tonnes	7.25028	0.953042
DNK	c069	2572	Groundnut Oil	Vegetable oils	tonnes	8.52514	0.95265
DNK	c070	2573	Sunflowerseed Oil	Vegetable oils	tonnes	6.72404	0.9526
DNK	c071	2574	Rape and Mustard Oil	Vegetable oils	tonnes	6.42825	0.952013
DNK	c072	2575	Cottonseed Oil	Vegetable oils	tonnes	8.70352	0.953733
DNK	c073	2576	Palmkernel Oil	Vegetable oils	tonnes	8.36406	0.954844
DNK	c075	2578	Coconut Oil	Vegetable oils	tonnes	6.18122	0.9544
DNK	c076	2579	Sesameseed Oil	Vegetable oils	tonnes	7.88987	0.9504
DNK	c077	2580	Olive Oil	Vegetable oils	tonnes	8.78798	0.9504
DNK	c078	2581	Ricebran Oil	Vegetable oils	tonnes	6.50714	0.9504
DNK	c079	2582	Maize Germ Oil	Vegetable oils	tonnes	6.74457	0.9504
DNK	c080	2586	Oilcrops Oil, Other	Vegetable oils	tonnes	7.4288	0.9504
DNK	c119	2737	Fats, Animals, Raw	Animal fats	tonnes	13.9528	0.8544
DNK	c015	2536	Sugar cane	Sugar crops	tonnes	0.304086	1
DNK	c016	2537	Sugar beet	Sugar crops	tonnes	0.558859	1
DNK	c065	2541	Sugar non-centrifugal	Sugar, sweeteners	tonnes	4.41786	0.94335
DNK	c066	2542	Sugar (Raw Equivalent)	Sugar, sweeteners	tonnes	3.66069	0.94335
DNK	c067	2543	Sweeteners, Other	Sugar, sweeteners	tonnes	1.95254	0.94335
DNK	c121	2745	Honey	Honey	tonnes	3.12797	0.94335
DNK	c045	2630	Coffee and products	Coffee, tea, cocoa	tonnes	0.253223	1
DNK	c046	2633	Cocoa Beans and products	Coffee, tea, cocoa	tonnes	7.54388	1
DNK	c047	2635	Tea (including mate)	Coffee, tea, cocoa	tonnes	0.208559	1
DNK	c090	2655	Wine	Alcohol	tonnes	0.792184	1
DNK	c091	2656	Beer	Alcohol	tonnes	0.438832	1
DNK	c092	2657	Beverages, Fermented	Alcohol	tonnes	0.682807	1
DNK	c093	2658	Beverages, Alcoholic	Alcohol	tonnes	2.86867	1
DNK	c117	2735	Meat, Other	Meat	tonnes	2.13577	0.8544
DNK	c118	2736	Offals, Edible	Meat	tonnes	1.298	0.8544
DNK	c024	2558	Rape and Mustardseed	Oil crops	tonnes	1.71968	0.951511
DNK	c025	328	Seed cotton	Oil crops	tonnes		1
DNK	c028	254	Oil, palm fruit	Oil crops	tonnes		1
DNK	c029	2563	Olives (including preserved)	Oil crops	tonnes	0.39485	0.9504
DNK	c048	677	Hops	Vegetables, fruit, nuts, pulses, spices	tonnes		1
DNK	c053	2662	Jute	Fibre crops	tonnes		1
DNK	c054	2663	Jute-Like Fibres	Fibre crops	tonnes		1
DNK	c055	2664	Soft-Fibres, Other	Fibre crops	tonnes		1
DNK	c056	2665	Sisal	Fibre crops	tonnes		1
DNK	c057	2666	Abaca	Fibre crops	tonnes		1
DNK	c058	2667	Hard Fibres, Other	Fibre crops	tonnes		1
DNK	c059	2671	Tobacco	Tobacco, rubber	tonnes		1
DNK	c060	2672	Rubber	Tobacco, rubber	tonnes		1
DNK	c061	2000	Fodder crops	Fodder crops	tonnes		1
DNK	c062	2001	Grazing	Grazing	tonnes		1
DNK	c063	2559	Cottonseed	Fibre crops	tonnes	4.90679	1
DNK	c064	2562	Palm kernels	Oil crops	tonnes		1
DNK	c081	2590	Soyabean Cake	Oil cakes	tonnes		1
DNK	c082	2591	Groundnut Cake	Oil cakes	tonnes		1
DNK	c083	2592	Sunflowerseed Cake	Oil cakes	tonnes		1
DNK	c084	2593	Rape and Mustard Cake	Oil cakes	tonnes		1
DNK	c085	2594	Cottonseed Cake	Oil cakes	tonnes		1
DNK	c086	2595	Palmkernel Cake	Oil cakes	tonnes		1
DNK	c087	2596	Copra Cake	Oil cakes	tonnes		1
DNK	c088	2597	Sesameseed Cake	Oil cakes	tonnes		1
DNK	c089	2598	Oilseed Cakes, Other	Oil cakes	tonnes		1
DNK	c094	2659	Alcohol, Non-Food	Ethanol	tonnes		1
DNK	c095	2661	Cotton lint	Fibre crops	tonnes		1
DNK	c096	866	Cattle	Live animals	1000 Head		1
DNK	c097	946	Buffaloes	Live animals	1000 Head		1
DNK	c098	976	Sheep	Live animals	1000 Head		1
DNK	c099	1016	Goats	Live animals	1000 Head		1
DNK	c100	1034	Pigs	Live animals	1000 Head		1
DNK	c101	2029	Poultry Birds	Live animals	1000 Head		1
DNK	c102	1096	Horses	Live animals	1000 Head		1
DNK	c103	1107	Asses	Live animals	1000 Head		1
DNK	c104	1110	Mules	Live animals	1000 Head		1
DNK	c105	1126	Camels	Live animals	1000 Head		1
DNK	c106	1157	Camelids, other	Live animals	1000 Head		1
DNK	c107	1140	Rabbits and hares	Live animals	1000 Head		1
DNK	c108	1150	Rodents, other	Live animals	1000 Head		1
DNK	c112	2746	Wool (Clean Eq.)	Hides, skins, wool	tonnes		1
DNK	c120	2748	Hides and skins	Hides, skins, wool	tonnes		1
DNK	c122	2747	Silk	Hides, skins, wool	tonnes		1
EST	c001	2807	Rice and products	Cereals	tonnes	2.2306	0.735
EST	c002	2511	Wheat and products	Cereals	tonnes	2.64878	0.735
EST	c003	2513	Barley and products	Cereals	tonnes	1.83985	0.735
EST	c004	2514	Maize and products	Cereals	tonnes	2.49687	0.735
EST	c005	2515	Rye and products	Cereals	tonnes	2.67526	0.735
EST	c006	2516	Oats	Cereals	tonnes	2.13444	0.735
EST	c007	2517	Millet and products	Cereals	tonnes	3.40921	0.774533
EST	c008	2518	Sorghum and products	Cereals	tonnes	1.89055	0.758533
EST	c009	2520	Cereals, Other	Cereals	tonnes	2.99502	0.735
EST	c010	2531	Potatoes and products	Roots and tubers	tonnes	0.632143	0.831541
EST	c011	2532	Cassava and products	Roots and tubers	tonnes	1.01385	0.880478
EST	c013	2534	Roots, Other	Roots and tubers	tonnes	0.963559	0.867573
EST	c014	2535	Yams	Roots and tubers	tonnes	0.90566	0.881852
EST	c012	2533	Sweet potatoes	Roots and tubers	tonnes	0.939046	0.831541
EST	c031	2601	Tomatoes and products	Vegetables, fruit, nuts, pulses, spices	tonnes	0.139597	0.7914
EST	c032	2602	Onions	Vegetables, fruit, nuts, pulses, spices	tonnes	0.406841	0.7914
EST	c033	2605	Vegetables, Other	Vegetables, fruit, nuts, pulses, spices	tonnes	0.205701	0.7914
EST	c049	2640	Pepper	Vegetables, fruit, nuts, pulses, spices	tonnes	2.67548	0.7914
EST	c050	2641	Pimento	Vegetables, fruit, nuts, pulses, spices	tonnes	2.12208	0.7914
EST	c051	2642	Cloves	Vegetables, fruit, nuts, pulses, spices	tonnes	2.29486	0.7914
EST	c052	2645	Spices, Other	Vegetables, fruit, nuts, pulses, spices	tonnes	3.16253	0.7914
EST	c034	2611	Oranges, Mandarines	Vegetables, fruit, nuts, pulses, spices	tonnes	0.246725	0.7914
EST	c035	2612	Lemons, Limes and products	Vegetables, fruit, nuts, pulses, spices	tonnes	0.268521	0.7914
EST	c036	2613	Grapefruit and products	Vegetables, fruit, nuts, pulses, spices	tonnes	0.257369	0.7914
EST	c037	2614	Citrus, Other	Vegetables, fruit, nuts, pulses, spices	tonnes	0.729233	0.7914
EST	c038	2615	Bananas	Vegetables, fruit, nuts, pulses, spices	tonnes	0.653596	0.7914
EST	c039	2616	Plantains	Vegetables, fruit, nuts, pulses, spices	tonnes	0.740604	0.7914
EST	c040	2617	Apples and products	Vegetables, fruit, nuts, pulses, spices	tonnes	0.478408	0.7914
EST	c041	2618	Pineapples and products	Vegetables, fruit, nuts, pulses, spices	tonnes	0.163459	0.7914
EST	c042	2619	Dates	Vegetables, fruit, nuts, pulses, spices	tonnes	1.83727	0.7914
EST	c043	2620	Grapes and products (excl wine)	Vegetables, fruit, nuts, pulses, spices	tonnes	0.744466	0.7914
EST	c044	2625	Fruits, Other	Vegetables, fruit, nuts, pulses, spices	tonnes	0.533118	0.7914
EST	c109	2848	Milk - Excluding Butter	Milk	tonnes	0.795628	0.92535
EST	c110	2740	Butter, Ghee	Milk	tonnes	8.0856	0.92535
EST	c113	2731	Bovine Meat	Meat	tonnes	1.56044	0.8544
EST	c114	2732	Mutton & Goat Meat	Meat	tonnes	2.09686	0.8544
EST	c115	2733	Pigmeat	Meat	tonnes	1.65014	0.8544
EST	c017	2546	Beans	Vegetables, fruit, nuts, pulses, spices	tonnes	3.10254	0.9504
EST	c018	2547	Peas	Vegetables, fruit, nuts, pulses, spices	tonnes	3.10051	0.953145
EST	c019	2549	Pulses, Other and products	Vegetables, fruit, nuts, pulses, spices	tonnes	3.35803	0.952993
EST	c020	2551	Nuts and products	Vegetables, fruit, nuts, pulses, spices	tonnes	0.718062	0.9504
EST	c021	2555	Soyabeans	Oil crops	tonnes	3.91378	0.9504
EST	c022	2552	Groundnuts	Oil crops	tonnes	1.64051	0.9504
EST	c023	2557	Sunflower seed	Oil crops	tonnes	4.42939	0.954313
EST	c026	2560	Coconuts - Incl Copra	Oil crops	tonnes	0.979304	0.9504
EST	c027	2561	Sesame seed	Oil crops	tonnes	5.74824	0.9529
EST	c030	2570	Oilcrops, Other	Oil crops	tonnes	2.84212	0.952139
EST	c111	2744	Eggs	Eggs	tonnes	1.30725	0.9016
EST	c116	2734	Poultry Meat	Meat	tonnes	1.60984	0.8544
EST	c123	2960	Fish, Seafood	Fish	tonnes	0.543301	0.853196
EST	c074	2577	Palm Oil	Vegetable oils	tonnes	6.30756	0.954844
EST	c068	2571	Soyabean Oil	Vegetable oils	tonnes	5.61128	0.9504
EST	c069	2572	Groundnut Oil	Vegetable oils	tonnes	8.52514	0.9504
EST	c070	2573	Sunflowerseed Oil	Vegetable oils	tonnes	8.18588	0.9504
EST	c071	2574	Rape and Mustard Oil	Vegetable oils	tonnes	9.89327	0.952013
EST	c072	2575	Cottonseed Oil	Vegetable oils	tonnes	8.70352	0.953733
EST	c073	2576	Palmkernel Oil	Vegetable oils	tonnes	8.36406	0.954844
EST	c075	2578	Coconut Oil	Vegetable oils	tonnes	6.18122	0.9504
EST	c076	2579	Sesameseed Oil	Vegetable oils	tonnes	8.49291	0.95343
EST	c077	2580	Olive Oil	Vegetable oils	tonnes	6.48442	0.9504
EST	c078	2581	Ricebran Oil	Vegetable oils	tonnes	6.50714	0.9504
EST	c079	2582	Maize Germ Oil	Vegetable oils	tonnes	9.63441	0.9504
EST	c080	2586	Oilcrops Oil, Other	Vegetable oils	tonnes	7.59042	0.9504
EST	c119	2737	Fats, Animals, Raw	Animal fats	tonnes	10.2072	0.8544
EST	c015	2536	Sugar cane	Sugar crops	tonnes	0.304086	1
EST	c016	2537	Sugar beet	Sugar crops	tonnes	0.558859	1
EST	c065	2541	Sugar non-centrifugal	Sugar, sweeteners	tonnes	4.41786	0.94335
EST	c066	2542	Sugar (Raw Equivalent)	Sugar, sweeteners	tonnes	3.74104	0.94335
EST	c067	2543	Sweeteners, Other	Sugar, sweeteners	tonnes	0.949666	0.94335
EST	c121	2745	Honey	Honey	tonnes	3.19207	0.94335
EST	c045	2630	Coffee and products	Coffee, tea, cocoa	tonnes	0.191189	1
EST	c046	2633	Cocoa Beans and products	Coffee, tea, cocoa	tonnes	9.87385	1
EST	c047	2635	Tea (including mate)	Coffee, tea, cocoa	tonnes	0.12218	1
EST	c090	2655	Wine	Alcohol	tonnes	0.753536	1
EST	c091	2656	Beer	Alcohol	tonnes	0.442135	1
EST	c092	2657	Beverages, Fermented	Alcohol	tonnes	0.682807	1
EST	c093	2658	Beverages, Alcoholic	Alcohol	tonnes	2.79129	1
EST	c117	2735	Meat, Other	Meat	tonnes	1.52725	0.8544
EST	c118	2736	Offals, Edible	Meat	tonnes	1.31966	0.8544
EST	c024	2558	Rape and Mustardseed	Oil crops	tonnes	0.580585	0.951511
EST	c025	328	Seed cotton	Oil crops	tonnes		1
EST	c028	254	Oil, palm fruit	Oil crops	tonnes		1
EST	c029	2563	Olives (including preserved)	Oil crops	tonnes	0.344605	0.9504
EST	c048	677	Hops	Vegetables, fruit, nuts, pulses, spices	tonnes		1
EST	c053	2662	Jute	Fibre crops	tonnes		1
EST	c054	2663	Jute-Like Fibres	Fibre crops	tonnes		1
EST	c055	2664	Soft-Fibres, Other	Fibre crops	tonnes		1
EST	c056	2665	Sisal	Fibre crops	tonnes		1
EST	c057	2666	Abaca	Fibre crops	tonnes		1
EST	c058	2667	Hard Fibres, Other	Fibre crops	tonnes		1
EST	c059	2671	Tobacco	Tobacco, rubber	tonnes		1
EST	c060	2672	Rubber	Tobacco, rubber	tonnes		1
EST	c061	2000	Fodder crops	Fodder crops	tonnes		1
EST	c062	2001	Grazing	Grazing	tonnes		1
EST	c063	2559	Cottonseed	Fibre crops	tonnes	4.90679	1
EST	c064	2562	Palm kernels	Oil crops	tonnes		1
EST	c081	2590	Soyabean Cake	Oil cakes	tonnes		1
EST	c082	2591	Groundnut Cake	Oil cakes	tonnes		1
EST	c083	2592	Sunflowerseed Cake	Oil cakes	tonnes		1
EST	c084	2593	Rape and Mustard Cake	Oil cakes	tonnes		1
EST	c085	2594	Cottonseed Cake	Oil cakes	tonnes		1
EST	c086	2595	Palmkernel Cake	Oil cakes	tonnes		1
EST	c087	2596	Copra Cake	Oil cakes	tonnes		1
EST	c088	2597	Sesameseed Cake	Oil cakes	tonnes		1
EST	c089	2598	Oilseed Cakes, Other	Oil cakes	tonnes		1
EST	c094	2659	Alcohol, Non-Food	Ethanol	tonnes		1
EST	c095	2661	Cotton lint	Fibre crops	tonnes		1
EST	c096	866	Cattle	Live animals	1000 Head		1
EST	c097	946	Buffaloes	Live animals	1000 Head		1
EST	c098	976	Sheep	Live animals	1000 Head		1
EST	c099	1016	Goats	Live animals	1000 Head		1
EST	c100	1034	Pigs	Live animals	1000 Head		1
EST	c101	2029	Poultry Birds	Live animals	1000 Head		1
EST	c102	1096	Horses	Live animals	1000 Head		1
EST	c103	1107	Asses	Live animals	1000 Head		1
EST	c104	1110	Mules	Live animals	1000 Head		1
EST	c105	1126	Camels	Live animals	1000 Head		1
EST	c106	1157	Camelids, other	Live animals	1000 Head		1
EST	c107	1140	Rabbits and hares	Live animals	1000 Head		1
EST	c108	1150	Rodents, other	Live animals	1000 Head		1
EST	c112	2746	Wool (Clean Eq.)	Hides, skins, wool	tonnes		1
EST	c120	2748	Hides and skins	Hides, skins, wool	tonnes		1
EST	c122	2747	Silk	Hides, skins, wool	tonnes		1
FIN	c001	2807	Rice and products	Cereals	tonnes	1.77399	0.735
FIN	c002	2511	Wheat and products	Cereals	tonnes	2.58248	0.735
FIN	c003	2513	Barley and products	Cereals	tonnes	2.25939	0.735
FIN	c004	2514	Maize and products	Cereals	tonnes	2.25972	0.773688
FIN	c005	2515	Rye and products	Cereals	tonnes	2.80521	0.735
FIN	c006	2516	Oats	Cereals	tonnes	2.19821	0.735
FIN	c007	2517	Millet and products	Cereals	tonnes	3.40921	0.774533
FIN	c008	2518	Sorghum and products	Cereals	tonnes	1.89055	0.758533
FIN	c009	2520	Cereals, Other	Cereals	tonnes	2.4494	0.735
FIN	c010	2531	Potatoes and products	Roots and tubers	tonnes	0.629903	0.831541
FIN	c011	2532	Cassava and products	Roots and tubers	tonnes	1.01385	0.880478
FIN	c013	2534	Roots, Other	Roots and tubers	tonnes	0.963559	0.867573
FIN	c014	2535	Yams	Roots and tubers	tonnes	0.90566	0.881852
FIN	c012	2533	Sweet potatoes	Roots and tubers	tonnes	1.19164	0.831541
FIN	c031	2601	Tomatoes and products	Vegetables, fruit, nuts, pulses, spices	tonnes	0.125145	0.7914
FIN	c032	2602	Onions	Vegetables, fruit, nuts, pulses, spices	tonnes	0.39487	0.7914
FIN	c033	2605	Vegetables, Other	Vegetables, fruit, nuts, pulses, spices	tonnes	0.235895	0.7914
FIN	c049	2640	Pepper	Vegetables, fruit, nuts, pulses, spices	tonnes	1.87553	0.7914
FIN	c050	2641	Pimento	Vegetables, fruit, nuts, pulses, spices	tonnes	2.82459	0.7914
FIN	c051	2642	Cloves	Vegetables, fruit, nuts, pulses, spices	tonnes	2.29486	0.824048
FIN	c052	2645	Spices, Other	Vegetables, fruit, nuts, pulses, spices	tonnes	2.14779	0.7914
FIN	c034	2611	Oranges, Mandarines	Vegetables, fruit, nuts, pulses, spices	tonnes	0.196863	0.7914
FIN	c035	2612	Lemons, Limes and products	Vegetables, fruit, nuts, pulses, spices	tonnes	0.260075	0.7914
FIN	c036	2613	Grapefruit and products	Vegetables, fruit, nuts, pulses, spices	tonnes	0.208393	0.7914
FIN	c037	2614	Citrus, Other	Vegetables, fruit, nuts, pulses, spices	tonnes	0.764818	0.7914
FIN	c038	2615	Bananas	Vegetables, fruit, nuts, pulses, spices	tonnes	0.65819	0.7914
FIN	c039	2616	Plantains	Vegetables, fruit, nuts, pulses, spices	tonnes	0.740604	0.807976
FIN	c040	2617	Apples and products	Vegetables, fruit, nuts, pulses, spices	tonnes	0.300885	0.7914
FIN	c041	2618	Pineapples and products	Vegetables, fruit, nuts, pulses, spices	tonnes	0.194112	0.7914
FIN	c042	2619	Dates	Vegetables, fruit, nuts, pulses, spices	tonnes	2.19821	0.7914
FIN	c043	2620	Grapes and products (excl wine)	Vegetables, fruit, nuts, pulses, spices	tonnes	0.672826	0.7914
FIN	c044	2625	Fruits, Other	Vegetables, fruit, nuts, pulses, spices	tonnes	0.560195	0.7914
FIN	c109	2848	Milk - Excluding Butter	Milk	tonnes	0.794954	0.92535
FIN	c110	2740	Butter, Ghee	Milk	tonnes	7.50366	0.92535
FIN	c113	2731	Bovine Meat	Meat	tonnes	1.7747	0.8544
FIN	c114	2732	Mutton & Goat Meat	Meat	tonnes	2.83347	0.8544
FIN	c115	2733	Pigmeat	Meat	tonnes	2.25999	0.8544
FIN	c017	2546	Beans	Vegetables, fruit, nuts, pulses, spices	tonnes	3.10254	0.9504
FIN	c018	2547	Peas	Vegetables, fruit, nuts, pulses, spices	tonnes	3.18226	0.9504
FIN	c019	2549	Pulses, Other and products	Vegetables, fruit, nuts, pulses, spices	tonnes	3.35803	0.9504
FIN	c020	2551	Nuts and products	Vegetables, fruit, nuts, pulses, spices	tonnes	0.645985	0.9504
FIN	c021	2555	Soyabeans	Oil crops	tonnes	3.91378	0.9504
FIN	c022	2552	Groundnuts	Oil crops	tonnes	2.03676	0.9504
FIN	c023	2557	Sunflower seed	Oil crops	tonnes	4.42939	0.954313
FIN	c026	2560	Coconuts - Incl Copra	Oil crops	tonnes	0.979304	0.9504
FIN	c027	2561	Sesame seed	Oil crops	tonnes	3.25014	0.9504
FIN	c030	2570	Oilcrops, Other	Oil crops	tonnes	2.84212	0.952139
FIN	c111	2744	Eggs	Eggs	tonnes	1.29803	0.9016
FIN	c116	2734	Poultry Meat	Meat	tonnes	1.30291	0.8544
FIN	c123	2960	Fish, Seafood	Fish	tonnes	0.65454	0.853196
FIN	c074	2577	Palm Oil	Vegetable oils	tonnes	6.30756	0.954844
FIN	c068	2571	Soyabean Oil	Vegetable oils	tonnes	7.25028	0.953042
FIN	c069	2572	Groundnut Oil	Vegetable oils	tonnes	8.52514	0.95265
FIN	c070	2573	Sunflowerseed Oil	Vegetable oils	tonnes	8.75922	0.9504
FIN	c071	2574	Rape and Mustard Oil	Vegetable oils	tonnes	0.057846	0.9504
FIN	c072	2575	Cottonseed Oil	Vegetable oils	tonnes	8.70352	0.953733
FIN	c073	2576	Palmkernel Oil	Vegetable oils	tonnes	8.36406	0.954844
FIN	c075	2578	Coconut Oil	Vegetable oils	tonnes	6.18122	0.9544
FIN	c076	2579	Sesameseed Oil	Vegetable oils	tonnes	8.49291	0.9504
FIN	c077	2580	Olive Oil	Vegetable oils	tonnes	9.08122	0.9504
FIN	c078	2581	Ricebran Oil	Vegetable oils	tonnes	6.50714	0.9504
FIN	c079	2582	Maize Germ Oil	Vegetable oils	tonnes	8.82683	0.953092
FIN	c080	2586	Oilcrops Oil, Other	Vegetable oils	tonnes	7.36971	0.9504
FIN	c119	2737	Fats, Animals, Raw	Animal fats	tonnes	3.95988	0.8544
FIN	c015	2536	Sugar cane	Sugar crops	tonnes	0.304086	1
FIN	c016	2537	Sugar beet	Sugar crops	tonnes	0.558859	1
FIN	c065	2541	Sugar non-centrifugal	Sugar, sweeteners	tonnes	4.41786	0.94335
FIN	c066	2542	Sugar (Raw Equivalent)	Sugar, sweeteners	tonnes	3.46039	0.94335
FIN	c067	2543	Sweeteners, Other	Sugar, sweeteners	tonnes	0.669165	0.94335
FIN	c121	2745	Honey	Honey	tonnes	3.59567	0.94335
FIN	c045	2630	Coffee and products	Coffee, tea, cocoa	tonnes	0.170584	1
FIN	c046	2633	Cocoa Beans and products	Coffee, tea, cocoa	tonnes	5.39939	1
FIN	c047	2635	Tea (including mate)	Coffee, tea, cocoa	tonnes	0.141594	1
FIN	c090	2655	Wine	Alcohol	tonnes	0.804411	1
FIN	c091	2656	Beer	Alcohol	tonnes	0.439468	1
FIN	c092	2657	Beverages, Fermented	Alcohol	tonnes	0.564919	1
FIN	c093	2658	Beverages, Alcoholic	Alcohol	tonnes	2.80684	1
FIN	c117	2735	Meat, Other	Meat	tonnes	1.08929	0.8544
FIN	c118	2736	Offals, Edible	Meat	tonnes	1.22535	0.8544
FIN	c024	2558	Rape and Mustardseed	Oil crops	tonnes	1.20196	0.951511
FIN	c025	328	Seed cotton	Oil crops	tonnes		1
FIN	c028	254	Oil, palm fruit	Oil crops	tonnes		1
FIN	c029	2563	Olives (including preserved)	Oil crops	tonnes	0.381119	0.9504
FIN	c048	677	Hops	Vegetables, fruit, nuts, pulses, spices	tonnes		1
FIN	c053	2662	Jute	Fibre crops	tonnes		1
FIN	c054	2663	Jute-Like Fibres	Fibre crops	tonnes		1
FIN	c055	2664	Soft-Fibres, Other	Fibre crops	tonnes		1
FIN	c056	2665	Sisal	Fibre crops	tonnes		1
FIN	c057	2666	Abaca	Fibre crops	tonnes		1
FIN	c058	2667	Hard Fibres, Other	Fibre crops	tonnes		1
FIN	c059	2671	Tobacco	Tobacco, rubber	tonnes		1
FIN	c060	2672	Rubber	Tobacco, rubber	tonnes		1
FIN	c061	2000	Fodder crops	Fodder crops	tonnes		1
FIN	c062	2001	Grazing	Grazing	tonnes		1
FIN	c063	2559	Cottonseed	Fibre crops	tonnes	4.90679	1
FIN	c064	2562	Palm kernels	Oil crops	tonnes		1
FIN	c081	2590	Soyabean Cake	Oil cakes	tonnes		1
FIN	c082	2591	Groundnut Cake	Oil cakes	tonnes		1
FIN	c083	2592	Sunflowerseed Cake	Oil cakes	tonnes		1
FIN	c084	2593	Rape and Mustard Cake	Oil cakes	tonnes		1
FIN	c085	2594	Cottonseed Cake	Oil cakes	tonnes		1
FIN	c086	2595	Palmkernel Cake	Oil cakes	tonnes		1
FIN	c087	2596	Copra Cake	Oil cakes	tonnes		1
FIN	c088	2597	Sesameseed Cake	Oil cakes	tonnes		1
FIN	c089	2598	Oilseed Cakes, Other	Oil cakes	tonnes		1
FIN	c094	2659	Alcohol, Non-Food	Ethanol	tonnes		1
FIN	c095	2661	Cotton lint	Fibre crops	tonnes		1
FIN	c096	866	Cattle	Live animals	1000 Head		1
FIN	c097	946	Buffaloes	Live animals	1000 Head		1
FIN	c098	976	Sheep	Live animals	1000 Head		1
FIN	c099	1016	Goats	Live animals	1000 Head		1
FIN	c100	1034	Pigs	Live animals	1000 Head		1
FIN	c101	2029	Poultry Birds	Live animals	1000 Head		1
FIN	c102	1096	Horses	Live animals	1000 Head		1
FIN	c103	1107	Asses	Live animals	1000 Head		1
FIN	c104	1110	Mules	Live animals	1000 Head		1
FIN	c105	1126	Camels	Live animals	1000 Head		1
FIN	c106	1157	Camelids, other	Live animals	1000 Head		1
FIN	c107	1140	Rabbits and hares	Live animals	1000 Head		1
FIN	c108	1150	Rodents, other	Live animals	1000 Head		1
FIN	c112	2746	Wool (Clean Eq.)	Hides, skins, wool	tonnes		1
FIN	c120	2748	Hides and skins	Hides, skins, wool	tonnes		1
FIN	c122	2747	Silk	Hides, skins, wool	tonnes		1
FRA	c001	2807	Rice and products	Cereals	tonnes	2.47443	0.735
FRA	c002	2511	Wheat and products	Cereals	tonnes	2.52107	0.735
FRA	c003	2513	Barley and products	Cereals	tonnes	0.133283	0.735
FRA	c004	2514	Maize and products	Cereals	tonnes	1.85504	0.735
FRA	c005	2515	Rye and products	Cereals	tonnes	2.29841	0.735
FRA	c006	2516	Oats	Cereals	tonnes	2.21291	0.735
FRA	c007	2517	Millet and products	Cereals	tonnes	3.40921	0.774533
FRA	c008	2518	Sorghum and products	Cereals	tonnes	1.89055	0.758533
FRA	c009	2520	Cereals, Other	Cereals	tonnes	3.38201	0.735
FRA	c010	2531	Potatoes and products	Roots and tubers	tonnes	0.620339	0.831541
FRA	c011	2532	Cassava and products	Roots and tubers	tonnes	1.01385	0.880478
FRA	c013	2534	Roots, Other	Roots and tubers	tonnes	1.41162	0.831541
FRA	c014	2535	Yams	Roots and tubers	tonnes	0.94146	0.881852
FRA	c012	2533	Sweet potatoes	Roots and tubers	tonnes	0.939046	0.860459
FRA	c031	2601	Tomatoes and products	Vegetables, fruit, nuts, pulses, spices	tonnes	0.147318	0.7914
FRA	c032	2602	Onions	Vegetables, fruit, nuts, pulses, spices	tonnes	0.391074	0.7914
FRA	c033	2605	Vegetables, Other	Vegetables, fruit, nuts, pulses, spices	tonnes	0.254982	0.7914
FRA	c049	2640	Pepper	Vegetables, fruit, nuts, pulses, spices	tonnes	2.90119	0.7914
FRA	c050	2641	Pimento	Vegetables, fruit, nuts, pulses, spices	tonnes	2.96441	0.7914
FRA	c051	2642	Cloves	Vegetables, fruit, nuts, pulses, spices	tonnes	2.29486	0.824048
FRA	c052	2645	Spices, Other	Vegetables, fruit, nuts, pulses, spices	tonnes	2.6068	0.7914
FRA	c034	2611	Oranges, Mandarines	Vegetables, fruit, nuts, pulses, spices	tonnes	0.248797	0.7914
FRA	c035	2612	Lemons, Limes and products	Vegetables, fruit, nuts, pulses, spices	tonnes	0.285173	0.7914
FRA	c036	2613	Grapefruit and products	Vegetables, fruit, nuts, pulses, spices	tonnes	0.179549	0.7914
FRA	c037	2614	Citrus, Other	Vegetables, fruit, nuts, pulses, spices	tonnes	0.571831	0.7914
FRA	c038	2615	Bananas	Vegetables, fruit, nuts, pulses, spices	tonnes	0.658898	0.7914
FRA	c039	2616	Plantains	Vegetables, fruit, nuts, pulses, spices	tonnes	0.741482	0.7914
FRA	c040	2617	Apples and products	Vegetables, fruit, nuts, pulses, spices	tonnes	0.231471	0.7914
FRA	c041	2618	Pineapples and products	Vegetables, fruit, nuts, pulses, spices	tonnes	0.134329	0.7914
FRA	c042	2619	Dates	Vegetables, fruit, nuts, pulses, spices	tonnes	2.03282	0.7914
FRA	c043	2620	Grapes and products (excl wine)	Vegetables, fruit, nuts, pulses, spices	tonnes	0.580995	0.7914
FRA	c044	2625	Fruits, Other	Vegetables, fruit, nuts, pulses, spices	tonnes	0.579529	0.7914
FRA	c109	2848	Milk - Excluding Butter	Milk	tonnes	0.735035	0.92535
FRA	c110	2740	Butter, Ghee	Milk	tonnes	7.42697	0.92535
FRA	c113	2731	Bovine Meat	Meat	tonnes	1.40576	0.8544
FRA	c114	2732	Mutton & Goat Meat	Meat	tonnes	2.17998	0.8544
FRA	c115	2733	Pigmeat	Meat	tonnes	1.97749	0.8544
FRA	c017	2546	Beans	Vegetables, fruit, nuts, pulses, spices	tonnes	3.19851	0.9504
FRA	c018	2547	Peas	Vegetables, fruit, nuts, pulses, spices	tonnes	0.643754	0.9504
FRA	c019	2549	Pulses, Other and products	Vegetables, fruit, nuts, pulses, spices	tonnes	3.32538	0.9504
FRA	c020	2551	Nuts and products	Vegetables, fruit, nuts, pulses, spices	tonnes	1.45763	0.9504
FRA	c021	2555	Soyabeans	Oil crops	tonnes	2.21243	0.9504
FRA	c022	2552	Groundnuts	Oil crops	tonnes	1.93661	0.9504
FRA	c023	2557	Sunflower seed	Oil crops	tonnes	4.42939	0.954313
FRA	c026	2560	Coconuts - Incl Copra	Oil crops	tonnes	1.22214	0.9504
FRA	c027	2561	Sesame seed	Oil crops	tonnes	5.74824	0.9529
FRA	c030	2570	Oilcrops, Other	Oil crops	tonnes	2.84212	0.952139
FRA	c111	2744	Eggs	Eggs	tonnes	1.28164	0.9016
FRA	c116	2734	Poultry Meat	Meat	tonnes	1.32309	0.8544
FRA	c123	2960	Fish, Seafood	Fish	tonnes	0.56651	0.853196
FRA	c074	2577	Palm Oil	Vegetable oils	tonnes	9.01147	0.9504
FRA	c068	2571	Soyabean Oil	Vegetable oils	tonnes	8.97771	0.9504
FRA	c069	2572	Groundnut Oil	Vegetable oils	tonnes	9.55391	0.9504
FRA	c070	2573	Sunflowerseed Oil	Vegetable oils	tonnes	8.9967	0.9504
FRA	c071	2574	Rape and Mustard Oil	Vegetable oils	tonnes	8.9644	0.9504
FRA	c072	2575	Cottonseed Oil	Vegetable oils	tonnes	8.70352	0.9504
FRA	c073	2576	Palmkernel Oil	Vegetable oils	tonnes	8.36406	0.954844
FRA	c075	2578	Coconut Oil	Vegetable oils	tonnes	6.18122	0.9544
FRA	c076	2579	Sesameseed Oil	Vegetable oils	tonnes	8.70502	0.9504
FRA	c077	2580	Olive Oil	Vegetable oils	tonnes	8.99321	0.9504
FRA	c078	2581	Ricebran Oil	Vegetable oils	tonnes	6.50714	0.9504
FRA	c079	2582	Maize Germ Oil	Vegetable oils	tonnes	8.95378	0.9504
FRA	c080	2586	Oilcrops Oil, Other	Vegetable oils	tonnes	7.87997	0.9504
FRA	c119	2737	Fats, Animals, Raw	Animal fats	tonnes	2.32571	0.8544
FRA	c015	2536	Sugar cane	Sugar crops	tonnes	0.304086	1
FRA	c016	2537	Sugar beet	Sugar crops	tonnes	0.558859	1
FRA	c065	2541	Sugar non-centrifugal	Sugar, sweeteners	tonnes	4.41786	0.94335
FRA	c066	2542	Sugar (Raw Equivalent)	Sugar, sweeteners	tonnes	3.67206	0.94335
FRA	c067	2543	Sweeteners, Other	Sugar, sweeteners	tonnes	0.0814201	0.94335
FRA	c121	2745	Honey	Honey	tonnes	3.26341	0.94335
FRA	c045	2630	Coffee and products	Coffee, tea, cocoa	tonnes	0.334756	1
FRA	c046	2633	Cocoa Beans and products	Coffee, tea, cocoa	tonnes	3.7689	1
FRA	c047	2635	Tea (including mate)	Coffee, tea, cocoa	tonnes	0.147044	1
FRA	c090	2655	Wine	Alcohol	tonnes	0.751066	1
FRA	c091	2656	Beer	Alcohol	tonnes	0.439792	1
FRA	c092	2657	Beverages, Fermented	Alcohol	tonnes	0.550334	1
FRA	c093	2658	Beverages, Alcoholic	Alcohol	tonnes	2.82841	1
FRA	c117	2735	Meat, Other	Meat	tonnes	1.74769	0.8544
FRA	c118	2736	Offals, Edible	Meat	tonnes	1.37801	0.8544
FRA	c024	2558	Rape and Mustardseed	Oil crops	tonnes	1.20196	0.951511
FRA	c025	328	Seed cotton	Oil crops	tonnes		1
FRA	c028	254	Oil, palm fruit	Oil crops	tonnes		1
FRA	c029	2563	Olives (including preserved)	Oil crops	tonnes	0.43158	0.9504
FRA	c048	677	Hops	Vegetables, fruit, nuts, pulses, spices	tonnes		1
FRA	c053	2662	Jute	Fibre crops	tonnes		1
FRA	c054	2663	Jute-Like Fibres	Fibre crops	tonnes		1
FRA	c055	2664	Soft-Fibres, Other	Fibre crops	tonnes		1
FRA	c056	2665	Sisal	Fibre crops	tonnes		1
FRA	c057	2666	Abaca	Fibre crops	tonnes		1
FRA	c058	2667	Hard Fibres, Other	Fibre crops	tonnes		1
FRA	c059	2671	Tobacco	Tobacco, rubber	tonnes		1
FRA	c060	2672	Rubber	Tobacco, rubber	tonnes		1
FRA	c061	2000	Fodder crops	Fodder crops	tonnes		1
FRA	c062	2001	Grazing	Grazing	tonnes		1
FRA	c063	2559	Cottonseed	Fibre crops	tonnes	4.90679	1
FRA	c064	2562	Palm kernels	Oil crops	tonnes		1
FRA	c081	2590	Soyabean Cake	Oil cakes	tonnes		1
FRA	c082	2591	Groundnut Cake	Oil cakes	tonnes		1
FRA	c083	2592	Sunflowerseed Cake	Oil cakes	tonnes		1
FRA	c084	2593	Rape and Mustard Cake	Oil cakes	tonnes		1
FRA	c085	2594	Cottonseed Cake	Oil cakes	tonnes		1
FRA	c086	2595	Palmkernel Cake	Oil cakes	tonnes		1
FRA	c087	2596	Copra Cake	Oil cakes	tonnes		1
FRA	c088	2597	Sesameseed Cake	Oil cakes	tonnes		1
FRA	c089	2598	Oilseed Cakes, Other	Oil cakes	tonnes		1
FRA	c094	2659	Alcohol, Non-Food	Ethanol	tonnes		1
FRA	c095	2661	Cotton lint	Fibre crops	tonnes		1
FRA	c096	866	Cattle	Live animals	1000 Head		1
FRA	c097	946	Buffaloes	Live animals	1000 Head		1
FRA	c098	976	Sheep	Live animals	1000 Head		1
FRA	c099	1016	Goats	Live animals	1000 Head		1
FRA	c100	1034	Pigs	Live animals	1000 Head		1
FRA	c101	2029	Poultry Birds	Live animals	1000 Head		1
FRA	c102	1096	Horses	Live animals	1000 Head		1
FRA	c103	1107	Asses	Live animals	1000 Head		1
FRA	c104	1110	Mules	Live animals	1000 Head		1
FRA	c105	1126	Camels	Live animals	1000 Head		1
FRA	c106	1157	Camelids, other	Live animals	1000 Head		1
FRA	c107	1140	Rabbits and hares	Live animals	1000 Head		1
FRA	c108	1150	Rodents, other	Live animals	1000 Head		1
FRA	c112	2746	Wool (Clean Eq.)	Hides, skins, wool	tonnes		1
FRA	c120	2748	Hides and skins	Hides, skins, wool	tonnes		1
FRA	c122	2747	Silk	Hides, skins, wool	tonnes		1
PYF	c001	2807	Rice and products	Cereals	tonnes	2.34034	0.7154
PYF	c002	2511	Wheat and products	Cereals	tonnes	1.98706	0.7154
PYF	c003	2513	Barley and products	Cereals	tonnes	1.20842	0.7154
PYF	c004	2514	Maize and products	Cereals	tonnes	2.25972	0.773688
PYF	c005	2515	Rye and products	Cereals	tonnes	2.57538	0.744989
PYF	c006	2516	Oats	Cereals	tonnes	2.08228	0.7154
PYF	c007	2517	Millet and products	Cereals	tonnes	3.40921	0.774533
PYF	c008	2518	Sorghum and products	Cereals	tonnes	1.89055	0.758533
PYF	c009	2520	Cereals, Other	Cereals	tonnes	2.35193	0.7154
PYF	c010	2531	Potatoes and products	Roots and tubers	tonnes	0.559605	0.798898
PYF	c011	2532	Cassava and products	Roots and tubers	tonnes	1.0549	0.798898
PYF	c013	2534	Roots, Other	Roots and tubers	tonnes	0.936345	0.798898
PYF	c014	2535	Yams	Roots and tubers	tonnes	0.90566	0.881852
PYF	c012	2533	Sweet potatoes	Roots and tubers	tonnes	0.939046	0.860459
PYF	c031	2601	Tomatoes and products	Vegetables, fruit, nuts, pulses, spices	tonnes	0.187253	0.78264
PYF	c032	2602	Onions	Vegetables, fruit, nuts, pulses, spices	tonnes	0.29448	0.78264
PYF	c033	2605	Vegetables, Other	Vegetables, fruit, nuts, pulses, spices	tonnes	0.28598	0.78264
PYF	c049	2640	Pepper	Vegetables, fruit, nuts, pulses, spices	tonnes	2.67548	0.78264
PYF	c050	2641	Pimento	Vegetables, fruit, nuts, pulses, spices	tonnes	2.82459	0.803525
PYF	c051	2642	Cloves	Vegetables, fruit, nuts, pulses, spices	tonnes	2.29486	0.824048
PYF	c052	2645	Spices, Other	Vegetables, fruit, nuts, pulses, spices	tonnes	2.31812	0.78264
PYF	c034	2611	Oranges, Mandarines	Vegetables, fruit, nuts, pulses, spices	tonnes	0.213504	0.78264
PYF	c035	2612	Lemons, Limes and products	Vegetables, fruit, nuts, pulses, spices	tonnes	0.239694	0.78264
PYF	c036	2613	Grapefruit and products	Vegetables, fruit, nuts, pulses, spices	tonnes	0.219877	0.78264
PYF	c037	2614	Citrus, Other	Vegetables, fruit, nuts, pulses, spices	tonnes	0.388589	0.78264
PYF	c038	2615	Bananas	Vegetables, fruit, nuts, pulses, spices	tonnes	0.649658	0.78264
PYF	c039	2616	Plantains	Vegetables, fruit, nuts, pulses, spices	tonnes	0.740604	0.807976
PYF	c040	2617	Apples and products	Vegetables, fruit, nuts, pulses, spices	tonnes	0.255851	0.78264
PYF	c041	2618	Pineapples and products	Vegetables, fruit, nuts, pulses, spices	tonnes	0.306535	0.78264
PYF	c042	2619	Dates	Vegetables, fruit, nuts, pulses, spices	tonnes	1.83727	0.78264
PYF	c043	2620	Grapes and products (excl wine)	Vegetables, fruit, nuts, pulses, spices	tonnes	0.426582	0.78264
PYF	c044	2625	Fruits, Other	Vegetables, fruit, nuts, pulses, spices	tonnes	0.517397	0.78264
PYF	c109	2848	Milk - Excluding Butter	Milk	tonnes	1.97002	0.84575
PYF	c110	2740	Butter, Ghee	Milk	tonnes	9.13584	0.84575
PYF	c113	2731	Bovine Meat	Meat	tonnes	1.28302	0.8544
PYF	c114	2732	Mutton & Goat Meat	Meat	tonnes	1.31989	0.8544
PYF	c115	2733	Pigmeat	Meat	tonnes	2.13005	0.8544
PYF	c017	2546	Beans	Vegetables, fruit, nuts, pulses, spices	tonnes	3.10254	0.9504
PYF	c018	2547	Peas	Vegetables, fruit, nuts, pulses, spices	tonnes	2.54484	0.9504
PYF	c019	2549	Pulses, Other and products	Vegetables, fruit, nuts, pulses, spices	tonnes	2.21303	0.9504
PYF	c020	2551	Nuts and products	Vegetables, fruit, nuts, pulses, spices	tonnes	0.799531	0.9504
PYF	c021	2555	Soyabeans	Oil crops	tonnes	3.91378	0.9504
PYF	c022	2552	Groundnuts	Oil crops	tonnes	1.75016	0.9504
PYF	c023	2557	Sunflower seed	Oil crops	tonnes	4.42939	0.9504
PYF	c026	2560	Coconuts - Incl Copra	Oil crops	tonnes	0.856432	0.9504
PYF	c027	2561	Sesame seed	Oil crops	tonnes	5.74824	0.9504
PYF	c030	2570	Oilcrops, Other	Oil crops	tonnes	2.84212	0.952139
PYF	c111	2744	Eggs	Eggs	tonnes	1.10896	0.833
PYF	c116	2734	Poultry Meat	Meat	tonnes	1.3898	0.8544
PYF	c123	2960	Fish, Seafood	Fish	tonnes	0.670826	0.845188
PYF	c074	2577	Palm Oil	Vegetable oils	tonnes	6.30756	0.954844
PYF	c068	2571	Soyabean Oil	Vegetable oils	tonnes	7.25028	0.9504
PYF	c069	2572	Groundnut Oil	Vegetable oils	tonnes	8.52514	0.9504
PYF	c070	2573	Sunflowerseed Oil	Vegetable oils	tonnes	7.47064	0.9504
PYF	c071	2574	Rape and Mustard Oil	Vegetable oils	tonnes	6.42825	0.9504
PYF	c072	2575	Cottonseed Oil	Vegetable oils	tonnes	8.70352	0.953733
PYF	c073	2576	Palmkernel Oil	Vegetable oils	tonnes	8.36406	0.954844
PYF	c075	2578	Coconut Oil	Vegetable oils	tonnes	6.18122	0.9544
PYF	c076	2579	Sesameseed Oil	Vegetable oils	tonnes	8.49291	0.9504
PYF	c077	2580	Olive Oil	Vegetable oils	tonnes	8.82535	0.9504
PYF	c078	2581	Ricebran Oil	Vegetable oils	tonnes	6.50714	0.9504
PYF	c079	2582	Maize Germ Oil	Vegetable oils	tonnes	8.82683	0.9504
PYF	c080	2586	Oilcrops Oil, Other	Vegetable oils	tonnes	5.52274	0.9504
PYF	c119	2737	Fats, Animals, Raw	Animal fats	tonnes	6.15674	0.8544
PYF	c015	2536	Sugar cane	Sugar crops	tonnes	0.299308	1
PYF	c016	2537	Sugar beet	Sugar crops	tonnes	0.558859	1
PYF	c065	2541	Sugar non-centrifugal	Sugar, sweeteners	tonnes	4.41786	0.94335
PYF	c066	2542	Sugar (Raw Equivalent)	Sugar, sweeteners	tonnes	3.81653	0.94335
PYF	c067	2543	Sweeteners, Other	Sugar, sweeteners	tonnes	0.417547	0.94335
PYF	c121	2745	Honey	Honey	tonnes	3.25138	0.94335
PYF	c045	2630	Coffee and products	Coffee, tea, cocoa	tonnes	0.337025	1
PYF	c046	2633	Cocoa Beans and products	Coffee, tea, cocoa	tonnes	5.44349	1
PYF	c047	2635	Tea (including mate)	Coffee, tea, cocoa	tonnes	0.12218	1
PYF	c090	2655	Wine	Alcohol	tonnes	0.858837	1
PYF	c091	2656	Beer	Alcohol	tonnes	0.438492	1
PYF	c092	2657	Beverages, Fermented	Alcohol	tonnes	0.682807	1
PYF	c093	2658	Beverages, Alcoholic	Alcohol	tonnes	2.78733	1
PYF	c117	2735	Meat, Other	Meat	tonnes	1.52725	0.8544
PYF	c118	2736	Offals, Edible	Meat	tonnes	1.52202	0.8544
PYF	c024	2558	Rape and Mustardseed	Oil crops	tonnes	0.655332	0.9504
PYF	c025	328	Seed cotton	Oil crops	tonnes		1
PYF	c028	254	Oil, palm fruit	Oil crops	tonnes		1
PYF	c029	2563	Olives (including preserved)	Oil crops	tonnes	0.777446	0.9504
PYF	c048	677	Hops	Vegetables, fruit, nuts, pulses, spices	tonnes		1
PYF	c053	2662	Jute	Fibre crops	tonnes		1
PYF	c054	2663	Jute-Like Fibres	Fibre crops	tonnes		1
PYF	c055	2664	Soft-Fibres, Other	Fibre crops	tonnes		1
PYF	c056	2665	Sisal	Fibre crops	tonnes		1
PYF	c057	2666	Abaca	Fibre crops	tonnes		1
PYF	c058	2667	Hard Fibres, Other	Fibre crops	tonnes		1
PYF	c059	2671	Tobacco	Tobacco, rubber	tonnes		1
PYF	c060	2672	Rubber	Tobacco, rubber	tonnes		1
PYF	c061	2000	Fodder crops	Fodder crops	tonnes		1
PYF	c062	2001	Grazing	Grazing	tonnes		1
PYF	c063	2559	Cottonseed	Fibre crops	tonnes	4.90679	1
PYF	c064	2562	Palm kernels	Oil crops	tonnes		1
PYF	c081	2590	Soyabean Cake	Oil cakes	tonnes		1
PYF	c082	2591	Groundnut Cake	Oil cakes	tonnes		1
PYF	c083	2592	Sunflowerseed Cake	Oil cakes	tonnes		1
PYF	c084	2593	Rape and Mustard Cake	Oil cakes	tonnes		1
PYF	c085	2594	Cottonseed Cake	Oil cakes	tonnes		1
PYF	c086	2595	Palmkernel Cake	Oil cakes	tonnes		1
PYF	c087	2596	Copra Cake	Oil cakes	tonnes		1
PYF	c088	2597	Sesameseed Cake	Oil cakes	tonnes		1
PYF	c089	2598	Oilseed Cakes, Other	Oil cakes	tonnes		1
PYF	c094	2659	Alcohol, Non-Food	Ethanol	tonnes		1
PYF	c095	2661	Cotton lint	Fibre crops	tonnes		1
PYF	c096	866	Cattle	Live animals	1000 Head		1
PYF	c097	946	Buffaloes	Live animals	1000 Head		1
PYF	c098	976	Sheep	Live animals	1000 Head		1
PYF	c099	1016	Goats	Live animals	1000 Head		1
PYF	c100	1034	Pigs	Live animals	1000 Head		1
PYF	c101	2029	Poultry Birds	Live animals	1000 Head		1
PYF	c102	1096	Horses	Live animals	1000 Head		1
PYF	c103	1107	Asses	Live animals	1000 Head		1
PYF	c104	1110	Mules	Live animals	1000 Head		1
PYF	c105	1126	Camels	Live animals	1000 Head		1
PYF	c106	1157	Camelids, other	Live animals	1000 Head		1
PYF	c107	1140	Rabbits and hares	Live animals	1000 Head		1
PYF	c108	1150	Rodents, other	Live animals	1000 Head		1
PYF	c112	2746	Wool (Clean Eq.)	Hides, skins, wool	tonnes		1
PYF	c120	2748	Hides and skins	Hides, skins, wool	tonnes		1
PYF	c122	2747	Silk	Hides, skins, wool	tonnes		1
DEU	c001	2807	Rice and products	Cereals	tonnes	2.10085	0.735
DEU	c002	2511	Wheat and products	Cereals	tonnes	2.65965	0.735
DEU	c003	2513	Barley and products	Cereals	tonnes	2.71714	0.735
DEU	c004	2514	Maize and products	Cereals	tonnes	3.35128	0.735
DEU	c005	2515	Rye and products	Cereals	tonnes	2.79493	0.735
DEU	c006	2516	Oats	Cereals	tonnes	2.60342	0.735
DEU	c007	2517	Millet and products	Cereals	tonnes	3.5563	0.735
DEU	c008	2518	Sorghum and products	Cereals	tonnes	1.89055	0.758533
DEU	c009	2520	Cereals, Other	Cereals	tonnes	3.65128	0.735
DEU	c010	2531	Potatoes and products	Roots and tubers	tonnes	0.651995	0.831541
DEU	c011	2532	Cassava and products	Roots and tubers	tonnes	1.01385	0.880478
DEU	c013	2534	Roots, Other	Roots and tubers	tonnes	0.963559	0.867573
DEU	c014	2535	Yams	Roots and tubers	tonnes	0.607854	0.881852
DEU	c012	2533	Sweet potatoes	Roots and tubers	tonnes	0.939046	0.860459
DEU	c031	2601	Tomatoes and products	Vegetables, fruit, nuts, pulses, spices	tonnes	0.105825	0.7914
DEU	c032	2602	Onions	Vegetables, fruit, nuts, pulses, spices	tonnes	0.390763	0.7914
DEU	c033	2605	Vegetables, Other	Vegetables, fruit, nuts, pulses, spices	tonnes	0.225085	0.7914
DEU	c049	2640	Pepper	Vegetables, fruit, nuts, pulses, spices	tonnes	3.02327	0.7914
DEU	c050	2641	Pimento	Vegetables, fruit, nuts, pulses, spices	tonnes	3.15746	0.7914
DEU	c051	2642	Cloves	Vegetables, fruit, nuts, pulses, spices	tonnes	1.52116	0.824048
DEU	c052	2645	Spices, Other	Vegetables, fruit, nuts, pulses, spices	tonnes	2.758	0.7914
DEU	c034	2611	Oranges, Mandarines	Vegetables, fruit, nuts, pulses, spices	tonnes	0.214456	0.7914
DEU	c035	2612	Lemons, Limes and products	Vegetables, fruit, nuts, pulses, spices	tonnes	0.301257	0.7914
DEU	c036	2613	Grapefruit and products	Vegetables, fruit, nuts, pulses, spices	tonnes	0.216039	0.7914
DEU	c037	2614	Citrus, Other	Vegetables, fruit, nuts, pulses, spices	tonnes	1.18279	0.7914
DEU	c038	2615	Bananas	Vegetables, fruit, nuts, pulses, spices	tonnes	0.659133	0.7914
DEU	c039	2616	Plantains	Vegetables, fruit, nuts, pulses, spices	tonnes	0.743015	0.7914
DEU	c040	2617	Apples and products	Vegetables, fruit, nuts, pulses, spices	tonnes	0.504287	0.7914
DEU	c041	2618	Pineapples and products	Vegetables, fruit, nuts, pulses, spices	tonnes	0.16716	0.7914
DEU	c042	2619	Dates	Vegetables, fruit, nuts, pulses, spices	tonnes	2.05995	0.7914
DEU	c043	2620	Grapes and products (excl wine)	Vegetables, fruit, nuts, pulses, spices	tonnes	0.635346	0.7914
DEU	c044	2625	Fruits, Other	Vegetables, fruit, nuts, pulses, spices	tonnes	0.552312	0.7914
DEU	c109	2848	Milk - Excluding Butter	Milk	tonnes	0.851093	0.92535
DEU	c110	2740	Butter, Ghee	Milk	tonnes	7.41037	0.92535
DEU	c113	2731	Bovine Meat	Meat	tonnes	1.27857	0.8544
DEU	c114	2732	Mutton & Goat Meat	Meat	tonnes	2.22752	0.8544
DEU	c115	2733	Pigmeat	Meat	tonnes	1.63592	0.8544
DEU	c017	2546	Beans	Vegetables, fruit, nuts, pulses, spices	tonnes	3.19219	0.9504
DEU	c018	2547	Peas	Vegetables, fruit, nuts, pulses, spices	tonnes	1.38547	0.9504
DEU	c019	2549	Pulses, Other and products	Vegetables, fruit, nuts, pulses, spices	tonnes	3.38588	0.9504
DEU	c020	2551	Nuts and products	Vegetables, fruit, nuts, pulses, spices	tonnes	0.843723	0.9504
DEU	c021	2555	Soyabeans	Oil crops	tonnes	3.99085	0.9504
DEU	c022	2552	Groundnuts	Oil crops	tonnes	3.40517	0.9504
DEU	c023	2557	Sunflower seed	Oil crops	tonnes	4.42939	0.954313
DEU	c026	2560	Coconuts - Incl Copra	Oil crops	tonnes	1.26244	0.9504
DEU	c027	2561	Sesame seed	Oil crops	tonnes	5.74824	0.9529
DEU	c030	2570	Oilcrops, Other	Oil crops	tonnes	5.32405	0.9504
DEU	c111	2744	Eggs	Eggs	tonnes	1.16432	0.9016
DEU	c116	2734	Poultry Meat	Meat	tonnes	1.26103	0.8544
DEU	c123	2960	Fish, Seafood	Fish	tonnes	0.743022	0.853196
DEU	c074	2577	Palm Oil	Vegetable oils	tonnes	6.30756	0.954844
DEU	c068	2571	Soyabean Oil	Vegetable oils	tonnes	8.99911	0.9504
DEU	c069	2572	Groundnut Oil	Vegetable oils	tonnes	10.9414	0.9504
DEU	c070	2573	Sunflowerseed Oil	Vegetable oils	tonnes	8.76144	0.9504
DEU	c071	2574	Rape and Mustard Oil	Vegetable oils	tonnes	8.22531	0.9504
DEU	c072	2575	Cottonseed Oil	Vegetable oils	tonnes	8.70352	0.953733
DEU	c073	2576	Palmkernel Oil	Vegetable oils	tonnes	8.36406	0.954844
DEU	c075	2578	Coconut Oil	Vegetable oils	tonnes	6.18122	0.9544
DEU	c076	2579	Sesameseed Oil	Vegetable oils	tonnes	8.49291	0.95343
DEU	c077	2580	Olive Oil	Vegetable oils	tonnes	9.02079	0.9504
DEU	c078	2581	Ricebran Oil	Vegetable oils	tonnes	6.50714	0.9504
DEU	c079	2582	Maize Germ Oil	Vegetable oils	tonnes	9.11834	0.9504
DEU	c080	2586	Oilcrops Oil, Other	Vegetable oils	tonnes	7.90124	0.9504
DEU	c119	2737	Fats, Animals, Raw	Animal fats	tonnes	42.2852	0.8544
DEU	c015	2536	Sugar cane	Sugar crops	tonnes	0.304086	1
DEU	c016	2537	Sugar beet	Sugar crops	tonnes	0.558859	1
DEU	c065	2541	Sugar non-centrifugal	Sugar, sweeteners	tonnes	4.41786	0.94335
DEU	c066	2542	Sugar (Raw Equivalent)	Sugar, sweeteners	tonnes	3.65276	0.94335
DEU	c067	2543	Sweeteners, Other	Sugar, sweeteners	tonnes	2.75168	0.94335
DEU	c121	2745	Honey	Honey	tonnes	3.2879	0.94335
DEU	c045	2630	Coffee and products	Coffee, tea, cocoa	tonnes	0.321539	1
DEU	c046	2633	Cocoa Beans and products	Coffee, tea, cocoa	tonnes	7.18643	1
DEU	c047	2635	Tea (including mate)	Coffee, tea, cocoa	tonnes	0.130254	1
DEU	c090	2655	Wine	Alcohol	tonnes	0.798519	1
DEU	c091	2656	Beer	Alcohol	tonnes	0.439657	1
DEU	c092	2657	Beverages, Fermented	Alcohol	tonnes	0.304536	1
DEU	c093	2658	Beverages, Alcoholic	Alcohol	tonnes	2.82647	1
DEU	c117	2735	Meat, Other	Meat	tonnes	1.4212	0.8544
DEU	c118	2736	Offals, Edible	Meat	tonnes	1.40002	0.8544
DEU	c024	2558	Rape and Mustardseed	Oil crops	tonnes	3.55055	0.9504
DEU	c025	328	Seed cotton	Oil crops	tonnes		1
DEU	c028	254	Oil, palm fruit	Oil crops	tonnes		1
DEU	c029	2563	Olives (including preserved)	Oil crops	tonnes	0.395228	0.9504
DEU	c048	677	Hops	Vegetables, fruit, nuts, pulses, spices	tonnes		1
DEU	c053	2662	Jute	Fibre crops	tonnes		1
DEU	c054	2663	Jute-Like Fibres	Fibre crops	tonnes		1
DEU	c055	2664	Soft-Fibres, Other	Fibre crops	tonnes		1
DEU	c056	2665	Sisal	Fibre crops	tonnes		1
DEU	c057	2666	Abaca	Fibre crops	tonnes		1
DEU	c058	2667	Hard Fibres, Other	Fibre crops	tonnes		1
DEU	c059	2671	Tobacco	Tobacco, rubber	tonnes		1
DEU	c060	2672	Rubber	Tobacco, rubber	tonnes		1
DEU	c061	2000	Fodder crops	Fodder crops	tonnes		1
DEU	c062	2001	Grazing	Grazing	tonnes		1
DEU	c063	2559	Cottonseed	Fibre crops	tonnes	4.90679	1
DEU	c064	2562	Palm kernels	Oil crops	tonnes		1
DEU	c081	2590	Soyabean Cake	Oil cakes	tonnes		1
DEU	c082	2591	Groundnut Cake	Oil cakes	tonnes		1
DEU	c083	2592	Sunflowerseed Cake	Oil cakes	tonnes		1
DEU	c084	2593	Rape and Mustard Cake	Oil cakes	tonnes		1
DEU	c085	2594	Cottonseed Cake	Oil cakes	tonnes		1
DEU	c086	2595	Palmkernel Cake	Oil cakes	tonnes		1
DEU	c087	2596	Copra Cake	Oil cakes	tonnes		1
DEU	c088	2597	Sesameseed Cake	Oil cakes	tonnes		1
DEU	c089	2598	Oilseed Cakes, Other	Oil cakes	tonnes		1
DEU	c094	2659	Alcohol, Non-Food	Ethanol	tonnes		1
DEU	c095	2661	Cotton lint	Fibre crops	tonnes		1
DEU	c096	866	Cattle	Live animals	1000 Head		1
DEU	c097	946	Buffaloes	Live animals	1000 Head		1
DEU	c098	976	Sheep	Live animals	1000 Head		1
DEU	c099	1016	Goats	Live animals	1000 Head		1
DEU	c100	1034	Pigs	Live animals	1000 Head		1
DEU	c101	2029	Poultry Birds	Live animals	1000 Head		1
DEU	c102	1096	Horses	Live animals	1000 Head		1
DEU	c103	1107	Asses	Live animals	1000 Head		1
DEU	c104	1110	Mules	Live animals	1000 Head		1
DEU	c105	1126	Camels	Live animals	1000 Head		1
DEU	c106	1157	Camelids, other	Live animals	1000 Head		1
DEU	c107	1140	Rabbits and hares	Live animals	1000 Head		1
DEU	c108	1150	Rodents, other	Live animals	1000 Head		1
DEU	c112	2746	Wool (Clean Eq.)	Hides, skins, wool	tonnes		1
DEU	c120	2748	Hides and skins	Hides, skins, wool	tonnes		1
DEU	c122	2747	Silk	Hides, skins, wool	tonnes		1
GRC	c001	2807	Rice and products	Cereals	tonnes	2.35014	0.735
GRC	c002	2511	Wheat and products	Cereals	tonnes	2.64241	0.735
GRC	c003	2513	Barley and products	Cereals	tonnes	0.762226	0.735
GRC	c004	2514	Maize and products	Cereals	tonnes	2.6143	0.735
GRC	c005	2515	Rye and products	Cereals	tonnes	2.867	0.735
GRC	c006	2516	Oats	Cereals	tonnes	2.06079	0.735
GRC	c007	2517	Millet and products	Cereals	tonnes	3.40921	0.774533
GRC	c008	2518	Sorghum and products	Cereals	tonnes	1.89055	0.758533
GRC	c009	2520	Cereals, Other	Cereals	tonnes	3.89341	0.735
GRC	c010	2531	Potatoes and products	Roots and tubers	tonnes	0.645584	0.831541
GRC	c011	2532	Cassava and products	Roots and tubers	tonnes	1.01385	0.880478
GRC	c013	2534	Roots, Other	Roots and tubers	tonnes	0.963559	0.867573
GRC	c014	2535	Yams	Roots and tubers	tonnes	0.90566	0.881852
GRC	c012	2533	Sweet potatoes	Roots and tubers	tonnes	0.939046	0.831541
GRC	c031	2601	Tomatoes and products	Vegetables, fruit, nuts, pulses, spices	tonnes	0.192484	0.7914
GRC	c032	2602	Onions	Vegetables, fruit, nuts, pulses, spices	tonnes	0.392263	0.7914
GRC	c033	2605	Vegetables, Other	Vegetables, fruit, nuts, pulses, spices	tonnes	0.243773	0.7914
GRC	c049	2640	Pepper	Vegetables, fruit, nuts, pulses, spices	tonnes	3.20051	0.7914
GRC	c050	2641	Pimento	Vegetables, fruit, nuts, pulses, spices	tonnes	2.22757	0.7914
GRC	c051	2642	Cloves	Vegetables, fruit, nuts, pulses, spices	tonnes	2.29486	0.7914
GRC	c052	2645	Spices, Other	Vegetables, fruit, nuts, pulses, spices	tonnes	2.2954	0.7914
GRC	c034	2611	Oranges, Mandarines	Vegetables, fruit, nuts, pulses, spices	tonnes	0.253299	0.7914
GRC	c035	2612	Lemons, Limes and products	Vegetables, fruit, nuts, pulses, spices	tonnes	0.254555	0.7914
GRC	c036	2613	Grapefruit and products	Vegetables, fruit, nuts, pulses, spices	tonnes	0.182932	0.7914
GRC	c037	2614	Citrus, Other	Vegetables, fruit, nuts, pulses, spices	tonnes	0.528193	0.7914
GRC	c038	2615	Bananas	Vegetables, fruit, nuts, pulses, spices	tonnes	0.660232	0.7914
GRC	c039	2616	Plantains	Vegetables, fruit, nuts, pulses, spices	tonnes	0.740604	0.807976
GRC	c040	2617	Apples and products	Vegetables, fruit, nuts, pulses, spices	tonnes	0.283883	0.7914
GRC	c041	2618	Pineapples and products	Vegetables, fruit, nuts, pulses, spices	tonnes	0.134694	0.7914
GRC	c042	2619	Dates	Vegetables, fruit, nuts, pulses, spices	tonnes	2.42444	0.7914
GRC	c043	2620	Grapes and products (excl wine)	Vegetables, fruit, nuts, pulses, spices	tonnes	0.66569	0.7914
[truncated: 5,381 more rows]

## Sheet: S5
iso3c	comm_code	item_code	item	comm_group	unit	energy_content (kcal/g)	eat_ratio (1- food waste ratio)
ARM	c001	2807	Rice and products	Cereals	tonnes	2.42363	0.735
ARM	c002	2511	Wheat and products	Cereals	tonnes	2.53834	0.735
ARM	c003	2513	Barley and products	Cereals	tonnes	3.08967	0.735
ARM	c004	2514	Maize and products	Cereals	tonnes	2.99357	0.735
ARM	c005	2515	Rye and products	Cereals	tonnes	3.84703	0.735
ARM	c006	2516	Oats	Cereals	tonnes	2.11401	0.735
ARM	c007	2517	Millet and products	Cereals	tonnes	3.09914	0.89695
ARM	c008	2518	Sorghum and products	Cereals	tonnes	3.33564	0.876178
ARM	c009	2520	Cereals, Other	Cereals	tonnes	3.26246	0.735
ARM	c010	2531	Potatoes and products	Roots and tubers	tonnes	0.643359	0.831541
ARM	c011	2532	Cassava and products	Roots and tubers	tonnes	1.09645	0.922469
ARM	c013	2534	Roots, Other	Roots and tubers	tonnes	0.863013	0.922897
ARM	c014	2535	Yams	Roots and tubers	tonnes	0.873362	0.930556
ARM	c012	2533	Sweet potatoes	Roots and tubers	tonnes	0.887849	0.916853
ARM	c031	2601	Tomatoes and products	Vegetables, fruit, nuts, pulses, spices	tonnes	0.203906	0.7914
ARM	c032	2602	Onions	Vegetables, fruit, nuts, pulses, spices	tonnes	0.386455	0.7914
ARM	c033	2605	Vegetables, Other	Vegetables, fruit, nuts, pulses, spices	tonnes	0.266089	0.7914
ARM	c049	2640	Pepper	Vegetables, fruit, nuts, pulses, spices	tonnes	3.1556	0.835814
ARM	c050	2641	Pimento	Vegetables, fruit, nuts, pulses, spices	tonnes	3.18772	0.7914
ARM	c051	2642	Cloves	Vegetables, fruit, nuts, pulses, spices	tonnes	2.77415	0.849884
ARM	c052	2645	Spices, Other	Vegetables, fruit, nuts, pulses, spices	tonnes	2.43217	0.7914
ARM	c034	2611	Oranges, Mandarines	Vegetables, fruit, nuts, pulses, spices	tonnes	0.317641	0.7914
ARM	c035	2612	Lemons, Limes and products	Vegetables, fruit, nuts, pulses, spices	tonnes	0.279738	0.7914
ARM	c036	2613	Grapefruit and products	Vegetables, fruit, nuts, pulses, spices	tonnes	0.21034	0.7914
ARM	c037	2614	Citrus, Other	Vegetables, fruit, nuts, pulses, spices	tonnes	0.55407	0.7914
ARM	c038	2615	Bananas	Vegetables, fruit, nuts, pulses, spices	tonnes	0.649096	0.7914
ARM	c039	2616	Plantains	Vegetables, fruit, nuts, pulses, spices	tonnes	0.743545	0.859938
ARM	c040	2617	Apples and products	Vegetables, fruit, nuts, pulses, spices	tonnes	0.428243	0.7914
ARM	c041	2618	Pineapples and products	Vegetables, fruit, nuts, pulses, spices	tonnes	0.231092	0.7914
ARM	c042	2619	Dates	Vegetables, fruit, nuts, pulses, spices	tonnes	1.64414	0.7914
ARM	c043	2620	Grapes and products (excl wine)	Vegetables, fruit, nuts, pulses, spices	tonnes	0.501423	0.7914
ARM	c044	2625	Fruits, Other	Vegetables, fruit, nuts, pulses, spices	tonnes	0.477653	0.7914
ARM	c109	2848	Milk - Excluding Butter	Milk	tonnes	0.708076	0.92535
ARM	c110	2740	Butter, Ghee	Milk	tonnes	8.99749	0.92535
ARM	c113	2731	Bovine Meat	Meat	tonnes	1.97195	0.8544
ARM	c114	2732	Mutton & Goat Meat	Meat	tonnes	2.14458	0.8544
ARM	c115	2733	Pigmeat	Meat	tonnes	2.23334	0.8544
ARM	c017	2546	Beans	Vegetables, fruit, nuts, pulses, spices	tonnes	3.06257	0.9504
ARM	c018	2547	Peas	Vegetables, fruit, nuts, pulses, spices	tonnes	3.86887	0.960086
ARM	c019	2549	Pulses, Other and products	Vegetables, fruit, nuts, pulses, spices	tonnes	3.48435	0.9504
ARM	c020	2551	Nuts and products	Vegetables, fruit, nuts, pulses, spices	tonnes	3.90816	0.9504
ARM	c021	2555	Soyabeans	Oil crops	tonnes	3.64044	0.9504
ARM	c022	2552	Groundnuts	Oil crops	tonnes	3.82072	0.9504
ARM	c023	2557	Sunflower seed	Oil crops	tonnes	4.64089	0.959822
ARM	c026	2560	Coconuts - Incl Copra	Oil crops	tonnes	0.91337	0.9504
ARM	c027	2561	Sesame seed	Oil crops	tonnes	5.50659	0.9504
ARM	c030	2570	Oilcrops, Other	Oil crops	tonnes	4.66542	0.953733
ARM	c111	2744	Eggs	Eggs	tonnes	1.27756	0.9016
ARM	c116	2734	Poultry Meat	Meat	tonnes	1.40192	0.8544
ARM	c123	2960	Fish, Seafood	Fish	tonnes	0.791593	0.853196
ARM	c074	2577	Palm Oil	Vegetable oils	tonnes	2.53265	0.962714
ARM	c068	2571	Soyabean Oil	Vegetable oils	tonnes	6.16963	0.9504
ARM	c069	2572	Groundnut Oil	Vegetable oils	tonnes	6.69306	0.961588
ARM	c070	2573	Sunflowerseed Oil	Vegetable oils	tonnes	8.95534	0.9504
ARM	c071	2574	Rape and Mustard Oil	Vegetable oils	tonnes	5.25443	0.958914
ARM	c072	2575	Cottonseed Oil	Vegetable oils	tonnes	7.33575	0.962453
ARM	c073	2576	Palmkernel Oil	Vegetable oils	tonnes	4.59511	0.9504
ARM	c075	2578	Coconut Oil	Vegetable oils	tonnes	8.0694	0.9504
ARM	c076	2579	Sesameseed Oil	Vegetable oils	tonnes	8.91304	0.961456
ARM	c077	2580	Olive Oil	Vegetable oils	tonnes	8.65455	0.9504
ARM	c078	2581	Ricebran Oil	Vegetable oils	tonnes	9.53884	0.960333
ARM	c079	2582	Maize Germ Oil	Vegetable oils	tonnes	5.43051	0.9504
ARM	c080	2586	Oilcrops Oil, Other	Vegetable oils	tonnes	8.14013	0.9504
ARM	c119	2737	Fats, Animals, Raw	Animal fats	tonnes	6.26959	0.8544
ARM	c015	2536	Sugar cane	Sugar crops	tonnes	0.246434	1
ARM	c016	2537	Sugar beet	Sugar crops	tonnes	0.560855	1
ARM	c065	2541	Sugar non-centrifugal	Sugar, sweeteners	tonnes	3.78389	0.94335
ARM	c066	2542	Sugar (Raw Equivalent)	Sugar, sweeteners	tonnes	3.32958	0.94335
ARM	c067	2543	Sweeteners, Other	Sugar, sweeteners	tonnes	0.557148	0.94335
ARM	c121	2745	Honey	Honey	tonnes	3.5365	0.94335
ARM	c045	2630	Coffee and products	Coffee, tea, cocoa	tonnes	0.315233	1
ARM	c046	2633	Cocoa Beans and products	Coffee, tea, cocoa	tonnes	7.89438	1
ARM	c047	2635	Tea (including mate)	Coffee, tea, cocoa	tonnes	0.113148	1
ARM	c090	2655	Wine	Alcohol	tonnes	0.776119	1
ARM	c091	2656	Beer	Alcohol	tonnes	0.448786	1
ARM	c092	2657	Beverages, Fermented	Alcohol	tonnes	0.495223	1
ARM	c093	2658	Beverages, Alcoholic	Alcohol	tonnes	2.74207	1
ARM	c117	2735	Meat, Other	Meat	tonnes	1.39729	0.8544
ARM	c118	2736	Offals, Edible	Meat	tonnes	1.26618	0.8544
ARM	c024	2558	Rape and Mustardseed	Oil crops	tonnes	0.976174	0.951511
ARM	c025	328	Seed cotton	Oil crops	tonnes		1
ARM	c028	254	Oil, palm fruit	Oil crops	tonnes		1
ARM	c029	2563	Olives (including preserved)	Oil crops	tonnes	0.384282	0.9504
ARM	c048	677	Hops	Vegetables, fruit, nuts, pulses, spices	tonnes		1
ARM	c053	2662	Jute	Fibre crops	tonnes		1
ARM	c054	2663	Jute-Like Fibres	Fibre crops	tonnes		1
ARM	c055	2664	Soft-Fibres, Other	Fibre crops	tonnes		1
ARM	c056	2665	Sisal	Fibre crops	tonnes		1
ARM	c057	2666	Abaca	Fibre crops	tonnes		1
ARM	c058	2667	Hard Fibres, Other	Fibre crops	tonnes		1
ARM	c059	2671	Tobacco	Tobacco, rubber	tonnes		1
ARM	c060	2672	Rubber	Tobacco, rubber	tonnes		1
ARM	c061	2000	Fodder crops	Fodder crops	tonnes		1
ARM	c062	2001	Grazing	Grazing	tonnes		1
ARM	c063	2559	Cottonseed	Fibre crops	tonnes	4.90679	1
ARM	c064	2562	Palm kernels	Oil crops	tonnes		1
ARM	c081	2590	Soyabean Cake	Oil cakes	tonnes		1
ARM	c082	2591	Groundnut Cake	Oil cakes	tonnes		1
ARM	c083	2592	Sunflowerseed Cake	Oil cakes	tonnes		1
ARM	c084	2593	Rape and Mustard Cake	Oil cakes	tonnes		1
ARM	c085	2594	Cottonseed Cake	Oil cakes	tonnes		1
ARM	c086	2595	Palmkernel Cake	Oil cakes	tonnes		1
ARM	c087	2596	Copra Cake	Oil cakes	tonnes		1
ARM	c088	2597	Sesameseed Cake	Oil cakes	tonnes		1
ARM	c089	2598	Oilseed Cakes, Other	Oil cakes	tonnes		1
ARM	c094	2659	Alcohol, Non-Food	Ethanol	tonnes		1
ARM	c095	2661	Cotton lint	Fibre crops	tonnes		1
ARM	c096	866	Cattle	Live animals	1000 Head		1
ARM	c097	946	Buffaloes	Live animals	1000 Head		1
ARM	c098	976	Sheep	Live animals	1000 Head		1
ARM	c099	1016	Goats	Live animals	1000 Head		1
ARM	c100	1034	Pigs	Live animals	1000 Head		1
ARM	c101	2029	Poultry Birds	Live animals	1000 Head		1
ARM	c102	1096	Horses	Live animals	1000 Head		1
ARM	c103	1107	Asses	Live animals	1000 Head		1
ARM	c104	1110	Mules	Live animals	1000 Head		1
ARM	c105	1126	Camels	Live animals	1000 Head		1
ARM	c106	1157	Camelids, other	Live animals	1000 Head		1
ARM	c107	1140	Rabbits and hares	Live animals	1000 Head		1
ARM	c108	1150	Rodents, other	Live animals	1000 Head		1
ARM	c112	2746	Wool (Clean Eq.)	Hides, skins, wool	tonnes		1
ARM	c120	2748	Hides and skins	Hides, skins, wool	tonnes		1
ARM	c122	2747	Silk	Hides, skins, wool	tonnes		1
ALB	c001	2807	Rice and products	Cereals	tonnes	1.86828	0.735
ALB	c002	2511	Wheat and products	Cereals	tonnes	2.53819	0.735
ALB	c003	2513	Barley and products	Cereals	tonnes	1.679	0.735
ALB	c004	2514	Maize and products	Cereals	tonnes	2.73142	0.735
ALB	c005	2515	Rye and products	Cereals	tonnes	2.66799	0.735
ALB	c006	2516	Oats	Cereals	tonnes	1.98575	0.844355
ALB	c007	2517	Millet and products	Cereals	tonnes	3.09914	0.89695
ALB	c008	2518	Sorghum and products	Cereals	tonnes	3.33564	0.876178
ALB	c009	2520	Cereals, Other	Cereals	tonnes	0.55771	0.735
ALB	c010	2531	Potatoes and products	Roots and tubers	tonnes	0.640494	0.831541
ALB	c011	2532	Cassava and products	Roots and tubers	tonnes	1.09645	0.922469
ALB	c013	2534	Roots, Other	Roots and tubers	tonnes	0.863013	0.922897
ALB	c014	2535	Yams	Roots and tubers	tonnes	0.873362	0.930556
ALB	c012	2533	Sweet potatoes	Roots and tubers	tonnes	0.887849	0.831541
ALB	c031	2601	Tomatoes and products	Vegetables, fruit, nuts, pulses, spices	tonnes	0.195105	0.7914
ALB	c032	2602	Onions	Vegetables, fruit, nuts, pulses, spices	tonnes	0.391481	0.7914
ALB	c033	2605	Vegetables, Other	Vegetables, fruit, nuts, pulses, spices	tonnes	0.255299	0.7914
ALB	c049	2640	Pepper	Vegetables, fruit, nuts, pulses, spices	tonnes	3.1556	0.7914
ALB	c050	2641	Pimento	Vegetables, fruit, nuts, pulses, spices	tonnes	3.18772	0.7914
ALB	c051	2642	Cloves	Vegetables, fruit, nuts, pulses, spices	tonnes	2.77415	0.849884
ALB	c052	2645	Spices, Other	Vegetables, fruit, nuts, pulses, spices	tonnes	2.43217	0.7914
ALB	c034	2611	Oranges, Mandarines	Vegetables, fruit, nuts, pulses, spices	tonnes	0.34321	0.7914
ALB	c035	2612	Lemons, Limes and products	Vegetables, fruit, nuts, pulses, spices	tonnes	0.308743	0.7914
ALB	c036	2613	Grapefruit and products	Vegetables, fruit, nuts, pulses, spices	tonnes	0.220143	0.7914
ALB	c037	2614	Citrus, Other	Vegetables, fruit, nuts, pulses, spices	tonnes	0.55407	0.7914
ALB	c038	2615	Bananas	Vegetables, fruit, nuts, pulses, spices	tonnes	0.649039	0.7914
ALB	c039	2616	Plantains	Vegetables, fruit, nuts, pulses, spices	tonnes	0.743545	0.859938
ALB	c040	2617	Apples and products	Vegetables, fruit, nuts, pulses, spices	tonnes	0.528147	0.7914
ALB	c041	2618	Pineapples and products	Vegetables, fruit, nuts, pulses, spices	tonnes	0.178394	0.7914
ALB	c042	2619	Dates	Vegetables, fruit, nuts, pulses, spices	tonnes	2.05633	0.7914
ALB	c043	2620	Grapes and products (excl wine)	Vegetables, fruit, nuts, pulses, spices	tonnes	0.638848	0.7914
ALB	c044	2625	Fruits, Other	Vegetables, fruit, nuts, pulses, spices	tonnes	0.538661	0.7914
ALB	c109	2848	Milk - Excluding Butter	Milk	tonnes	0.773331	0.92535
ALB	c110	2740	Butter, Ghee	Milk	tonnes	7.20987	0.92535
ALB	c113	2731	Bovine Meat	Meat	tonnes	2.02666	0.8544
ALB	c114	2732	Mutton & Goat Meat	Meat	tonnes	1.86952	0.8544
ALB	c115	2733	Pigmeat	Meat	tonnes	2.24422	0.8544
ALB	c017	2546	Beans	Vegetables, fruit, nuts, pulses, spices	tonnes	3.19629	0.9504
ALB	c018	2547	Peas	Vegetables, fruit, nuts, pulses, spices	tonnes	3.1937	0.960086
ALB	c019	2549	Pulses, Other and products	Vegetables, fruit, nuts, pulses, spices	tonnes	3.40339	0.9504
ALB	c020	2551	Nuts and products	Vegetables, fruit, nuts, pulses, spices	tonnes	2.66662	0.9504
ALB	c021	2555	Soyabeans	Oil crops	tonnes	3.64044	0.958888
ALB	c022	2552	Groundnuts	Oil crops	tonnes	1.58403	0.9504
ALB	c023	2557	Sunflower seed	Oil crops	tonnes	4.64089	0.959822
ALB	c026	2560	Coconuts - Incl Copra	Oil crops	tonnes	0.91337	0.959171
ALB	c027	2561	Sesame seed	Oil crops	tonnes	5.50659	0.958641
ALB	c030	2570	Oilcrops, Other	Oil crops	tonnes	4.66542	0.953733
ALB	c111	2744	Eggs	Eggs	tonnes	1.41365	0.9016
ALB	c116	2734	Poultry Meat	Meat	tonnes	1.40308	0.8544
ALB	c123	2960	Fish, Seafood	Fish	tonnes	0.71001	0.853196
ALB	c074	2577	Palm Oil	Vegetable oils	tonnes	2.53265	0.962714
ALB	c068	2571	Soyabean Oil	Vegetable oils	tonnes	11.1234	0.9504
ALB	c069	2572	Groundnut Oil	Vegetable oils	tonnes	6.69306	0.9504
ALB	c070	2573	Sunflowerseed Oil	Vegetable oils	tonnes	8.74363	0.9504
ALB	c071	2574	Rape and Mustard Oil	Vegetable oils	tonnes	5.25443	0.958914
ALB	c072	2575	Cottonseed Oil	Vegetable oils	tonnes	7.33575	0.962453
ALB	c073	2576	Palmkernel Oil	Vegetable oils	tonnes	4.59511	0.96095
ALB	c075	2578	Coconut Oil	Vegetable oils	tonnes	8.0694	0.959969
ALB	c076	2579	Sesameseed Oil	Vegetable oils	tonnes	8.91304	0.961456
ALB	c077	2580	Olive Oil	Vegetable oils	tonnes	9.37021	0.9504
ALB	c078	2581	Ricebran Oil	Vegetable oils	tonnes	9.53884	0.960333
ALB	c079	2582	Maize Germ Oil	Vegetable oils	tonnes	12.0856	0.9504
ALB	c080	2586	Oilcrops Oil, Other	Vegetable oils	tonnes	8.2331	0.9504
ALB	c119	2737	Fats, Animals, Raw	Animal fats	tonnes	7.6428	0.8544
ALB	c015	2536	Sugar cane	Sugar crops	tonnes	0.246434	1
ALB	c016	2537	Sugar beet	Sugar crops	tonnes	0.560855	1
ALB	c065	2541	Sugar non-centrifugal	Sugar, sweeteners	tonnes	3.78389	0.94335
ALB	c066	2542	Sugar (Raw Equivalent)	Sugar, sweeteners	tonnes	3.7111	0.94335
ALB	c067	2543	Sweeteners, Other	Sugar, sweeteners	tonnes	0.458552	0.94335
ALB	c121	2745	Honey	Honey	tonnes	3.59838	0.94335
ALB	c045	2630	Coffee and products	Coffee, tea, cocoa	tonnes	0.170332	1
ALB	c046	2633	Cocoa Beans and products	Coffee, tea, cocoa	tonnes	8.6563	1
ALB	c047	2635	Tea (including mate)	Coffee, tea, cocoa	tonnes	0.0944199	1
ALB	c090	2655	Wine	Alcohol	tonnes	0.746184	1
ALB	c091	2656	Beer	Alcohol	tonnes	0.438722	1
ALB	c092	2657	Beverages, Fermented	Alcohol	tonnes	0.495223	1
ALB	c093	2658	Beverages, Alcoholic	Alcohol	tonnes	2.92483	1
ALB	c117	2735	Meat, Other	Meat	tonnes	1.39729	0.8544
ALB	c118	2736	Offals, Edible	Meat	tonnes	1.23478	0.8544
ALB	c024	2558	Rape and Mustardseed	Oil crops	tonnes	0.976174	0.951511
ALB	c025	328	Seed cotton	Oil crops	tonnes		1
ALB	c028	254	Oil, palm fruit	Oil crops	tonnes		1
ALB	c029	2563	Olives (including preserved)	Oil crops	tonnes	1.36545	0.9504
ALB	c048	677	Hops	Vegetables, fruit, nuts, pulses, spices	tonnes		1
ALB	c053	2662	Jute	Fibre crops	tonnes		1
ALB	c054	2663	Jute-Like Fibres	Fibre crops	tonnes		1
ALB	c055	2664	Soft-Fibres, Other	Fibre crops	tonnes		1
ALB	c056	2665	Sisal	Fibre crops	tonnes		1
ALB	c057	2666	Abaca	Fibre crops	tonnes		1
ALB	c058	2667	Hard Fibres, Other	Fibre crops	tonnes		1
ALB	c059	2671	Tobacco	Tobacco, rubber	tonnes		1
ALB	c060	2672	Rubber	Tobacco, rubber	tonnes		1
ALB	c061	2000	Fodder crops	Fodder crops	tonnes		1
ALB	c062	2001	Grazing	Grazing	tonnes		1
ALB	c063	2559	Cottonseed	Fibre crops	tonnes	4.90679	1
ALB	c064	2562	Palm kernels	Oil crops	tonnes		1
ALB	c081	2590	Soyabean Cake	Oil cakes	tonnes		1
ALB	c082	2591	Groundnut Cake	Oil cakes	tonnes		1
ALB	c083	2592	Sunflowerseed Cake	Oil cakes	tonnes		1
ALB	c084	2593	Rape and Mustard Cake	Oil cakes	tonnes		1
ALB	c085	2594	Cottonseed Cake	Oil cakes	tonnes		1
ALB	c086	2595	Palmkernel Cake	Oil cakes	tonnes		1
ALB	c087	2596	Copra Cake	Oil cakes	tonnes		1
ALB	c088	2597	Sesameseed Cake	Oil cakes	tonnes		1
ALB	c089	2598	Oilseed Cakes, Other	Oil cakes	tonnes		1
ALB	c094	2659	Alcohol, Non-Food	Ethanol	tonnes		1
ALB	c095	2661	Cotton lint	Fibre crops	tonnes		1
ALB	c096	866	Cattle	Live animals	1000 Head		1
ALB	c097	946	Buffaloes	Live animals	1000 Head		1
ALB	c098	976	Sheep	Live animals	1000 Head		1
ALB	c099	1016	Goats	Live animals	1000 Head		1
ALB	c100	1034	Pigs	Live animals	1000 Head		1
ALB	c101	2029	Poultry Birds	Live animals	1000 Head		1
ALB	c102	1096	Horses	Live animals	1000 Head		1
ALB	c103	1107	Asses	Live animals	1000 Head		1
ALB	c104	1110	Mules	Live animals	1000 Head		1
ALB	c105	1126	Camels	Live animals	1000 Head		1
ALB	c106	1157	Camelids, other	Live animals	1000 Head		1
ALB	c107	1140	Rabbits and hares	Live animals	1000 Head		1
ALB	c108	1150	Rodents, other	Live animals	1000 Head		1
ALB	c112	2746	Wool (Clean Eq.)	Hides, skins, wool	tonnes		1
ALB	c120	2748	Hides and skins	Hides, skins, wool	tonnes		1
ALB	c122	2747	Silk	Hides, skins, wool	tonnes		1
ARG	c001	2807	Rice and products	Cereals	tonnes	2.4224	0.864
ARG	c002	2511	Wheat and products	Cereals	tonnes	2.38508	0.864
ARG	c003	2513	Barley and products	Cereals	tonnes	2.01239	0.831393
ARG	c004	2514	Maize and products	Cereals	tonnes	2.81505	0.864
ARG	c005	2515	Rye and products	Cereals	tonnes	2.56517	0.7913
ARG	c006	2516	Oats	Cereals	tonnes	2.03456	0.864
ARG	c007	2517	Millet and products	Cereals	tonnes	3.09914	0.89695
ARG	c008	2518	Sorghum and products	Cereals	tonnes	3.33564	0.876178
ARG	c009	2520	Cereals, Other	Cereals	tonnes	3.1606	0.864
ARG	c010	2531	Potatoes and products	Roots and tubers	tonnes	0.635965	0.94672
ARG	c011	2532	Cassava and products	Roots and tubers	tonnes	1.1006	0.94672
ARG	c013	2534	Roots, Other	Roots and tubers	tonnes	0.863013	0.922897
ARG	c014	2535	Yams	Roots and tubers	tonnes	0.873362	0.930556
ARG	c012	2533	Sweet potatoes	Roots and tubers	tonnes	0.975097	0.94672
ARG	c031	2601	Tomatoes and products	Vegetables, fruit, nuts, pulses, spices	tonnes	0.178303	0.8811
ARG	c032	2602	Onions	Vegetables, fruit, nuts, pulses, spices	tonnes	0.390244	0.8811
ARG	c033	2605	Vegetables, Other	Vegetables, fruit, nuts, pulses, spices	tonnes	0.291738	0.8811
ARG	c049	2640	Pepper	Vegetables, fruit, nuts, pulses, spices	tonnes	2.95048	0.8811
ARG	c050	2641	Pimento	Vegetables, fruit, nuts, pulses, spices	tonnes	3.21339	0.8811
ARG	c051	2642	Cloves	Vegetables, fruit, nuts, pulses, spices	tonnes	2.77415	0.849884
ARG	c052	2645	Spices, Other	Vegetables, fruit, nuts, pulses, spices	tonnes	2.84911	0.8811
ARG	c034	2611	Oranges, Mandarines	Vegetables, fruit, nuts, pulses, spices	tonnes	0.329429	0.8811
ARG	c035	2612	Lemons, Limes and products	Vegetables, fruit, nuts, pulses, spices	tonnes	0.294515	0.8811
ARG	c036	2613	Grapefruit and products	Vegetables, fruit, nuts, pulses, spices	tonnes	0.165409	0.8811
ARG	c037	2614	Citrus, Other	Vegetables, fruit, nuts, pulses, spices	tonnes	0.327832	0.8811
ARG	c038	2615	Bananas	Vegetables, fruit, nuts, pulses, spices	tonnes	0.657852	0.8811
ARG	c039	2616	Plantains	Vegetables, fruit, nuts, pulses, spices	tonnes	0.819579	0.859938
ARG	c040	2617	Apples and products	Vegetables, fruit, nuts, pulses, spices	tonnes	0.457759	0.8811
ARG	c041	2618	Pineapples and products	Vegetables, fruit, nuts, pulses, spices	tonnes	0.199274	0.8811
ARG	c042	2619	Dates	Vegetables, fruit, nuts, pulses, spices	tonnes	2.04164	0.816697
ARG	c043	2620	Grapes and products (excl wine)	Vegetables, fruit, nuts, pulses, spices	tonnes	0.620344	0.8811
ARG	c044	2625	Fruits, Other	Vegetables, fruit, nuts, pulses, spices	tonnes	0.502022	0.8811
ARG	c109	2848	Milk - Excluding Butter	Milk	tonnes	0.570961	0.8832
ARG	c110	2740	Butter, Ghee	Milk	tonnes	7.39856	0.8832
ARG	c113	2731	Bovine Meat	Meat	tonnes	2.04583	0.893
ARG	c114	2732	Mutton & Goat Meat	Meat	tonnes	2.08928	0.893
ARG	c115	2733	Pigmeat	Meat	tonnes	2.34434	0.893
ARG	c017	2546	Beans	Vegetables, fruit, nuts, pulses, spices	tonnes	3.15212	0.9604
ARG	c018	2547	Peas	Vegetables, fruit, nuts, pulses, spices	tonnes	3.21895	0.9604
ARG	c019	2549	Pulses, Other and products	Vegetables, fruit, nuts, pulses, spices	tonnes	3.31082	0.9604
ARG	c020	2551	Nuts and products	Vegetables, fruit, nuts, pulses, spices	tonnes	1.83594	0.9604
ARG	c021	2555	Soyabeans	Oil crops	tonnes	3.64044	0.9604
ARG	c022	2552	Groundnuts	Oil crops	tonnes	4.59728	0.9604
ARG	c023	2557	Sunflower seed	Oil crops	tonnes	4.64089	0.959822
ARG	c026	2560	Coconuts - Incl Copra	Oil crops	tonnes	1.27407	0.9604
ARG	c027	2561	Sesame seed	Oil crops	tonnes	5.50659	0.9604
ARG	c030	2570	Oilcrops, Other	Oil crops	tonnes	4.66542	0.953733
ARG	c111	2744	Eggs	Eggs	tonnes	1.27738	0.9216
ARG	c116	2734	Poultry Meat	Meat	tonnes	1.3728	0.893
ARG	c123	2960	Fish, Seafood	Fish	tonnes	0.582272	0.8908
ARG	c074	2577	Palm Oil	Vegetable oils	tonnes	2.53265	0.962714
ARG	c068	2571	Soyabean Oil	Vegetable oils	tonnes	7.11632	0.9604
ARG	c069	2572	Groundnut Oil	Vegetable oils	tonnes	8.97166	0.961588
ARG	c070	2573	Sunflowerseed Oil	Vegetable oils	tonnes	6.68127	0.9604
ARG	c071	2574	Rape and Mustard Oil	Vegetable oils	tonnes	9.63245	0.958914
ARG	c072	2575	Cottonseed Oil	Vegetable oils	tonnes	9.16107	0.9604
ARG	c073	2576	Palmkernel Oil	Vegetable oils	tonnes	4.59511	0.96095
ARG	c075	2578	Coconut Oil	Vegetable oils	tonnes	9.18388	0.9604
ARG	c076	2579	Sesameseed Oil	Vegetable oils	tonnes	8.91304	0.961456
ARG	c077	2580	Olive Oil	Vegetable oils	tonnes	8.81431	0.9604
ARG	c078	2581	Ricebran Oil	Vegetable oils	tonnes	9.53884	0.960333
ARG	c079	2582	Maize Germ Oil	Vegetable oils	tonnes	8.83975	0.9604
ARG	c080	2586	Oilcrops Oil, Other	Vegetable oils	tonnes	8.60927	0.9604
ARG	c119	2737	Fats, Animals, Raw	Animal fats	tonnes	5.71672	0.893
ARG	c015	2536	Sugar cane	Sugar crops	tonnes	0.246434	1
ARG	c016	2537	Sugar beet	Sugar crops	tonnes	0.560855	1
ARG	c065	2541	Sugar non-centrifugal	Sugar, sweeteners	tonnes	3.78389	0.94335
ARG	c066	2542	Sugar (Raw Equivalent)	Sugar, sweeteners	tonnes	3.64148	0.94335
ARG	c067	2543	Sweeteners, Other	Sugar, sweeteners	tonnes	2.37945	0.94335
ARG	c121	2745	Honey	Honey	tonnes	1.80307	0.94335
ARG	c045	2630	Coffee and products	Coffee, tea, cocoa	tonnes	0.341484	1
ARG	c046	2633	Cocoa Beans and products	Coffee, tea, cocoa	tonnes	3.56957	1
ARG	c047	2635	Tea (including mate)	Coffee, tea, cocoa	tonnes	0.107479	1
ARG	c090	2655	Wine	Alcohol	tonnes	0.799148	1
ARG	c091	2656	Beer	Alcohol	tonnes	0.438704	1
ARG	c092	2657	Beverages, Fermented	Alcohol	tonnes	0.546386	1
ARG	c093	2658	Beverages, Alcoholic	Alcohol	tonnes	2.83393	1
ARG	c117	2735	Meat, Other	Meat	tonnes	1.36086	0.893
ARG	c118	2736	Offals, Edible	Meat	tonnes	1.24227	0.893
ARG	c024	2558	Rape and Mustardseed	Oil crops	tonnes	0.976174	0.951511
ARG	c025	328	Seed cotton	Oil crops	tonnes		1
ARG	c028	254	Oil, palm fruit	Oil crops	tonnes		1
ARG	c029	2563	Olives (including preserved)	Oil crops	tonnes	1.36401	0.9604
ARG	c048	677	Hops	Vegetables, fruit, nuts, pulses, spices	tonnes		1
ARG	c053	2662	Jute	Fibre crops	tonnes		1
ARG	c054	2663	Jute-Like Fibres	Fibre crops	tonnes		1
ARG	c055	2664	Soft-Fibres, Other	Fibre crops	tonnes		1
ARG	c056	2665	Sisal	Fibre crops	tonnes		1
ARG	c057	2666	Abaca	Fibre crops	tonnes		1
ARG	c058	2667	Hard Fibres, Other	Fibre crops	tonnes		1
ARG	c059	2671	Tobacco	Tobacco, rubber	tonnes		1
ARG	c060	2672	Rubber	Tobacco, rubber	tonnes		1
ARG	c061	2000	Fodder crops	Fodder crops	tonnes		1
ARG	c062	2001	Grazing	Grazing	tonnes		1
ARG	c063	2559	Cottonseed	Fibre crops	tonnes	4.90679	1
ARG	c064	2562	Palm kernels	Oil crops	tonnes		1
ARG	c081	2590	Soyabean Cake	Oil cakes	tonnes		1
ARG	c082	2591	Groundnut Cake	Oil cakes	tonnes		1
ARG	c083	2592	Sunflowerseed Cake	Oil cakes	tonnes		1
ARG	c084	2593	Rape and Mustard Cake	Oil cakes	tonnes		1
ARG	c085	2594	Cottonseed Cake	Oil cakes	tonnes		1
ARG	c086	2595	Palmkernel Cake	Oil cakes	tonnes		1
ARG	c087	2596	Copra Cake	Oil cakes	tonnes		1
ARG	c088	2597	Sesameseed Cake	Oil cakes	tonnes		1
ARG	c089	2598	Oilseed Cakes, Other	Oil cakes	tonnes		1
ARG	c094	2659	Alcohol, Non-Food	Ethanol	tonnes		1
ARG	c095	2661	Cotton lint	Fibre crops	tonnes		1
ARG	c096	866	Cattle	Live animals	1000 Head		1
ARG	c097	946	Buffaloes	Live animals	1000 Head		1
ARG	c098	976	Sheep	Live animals	1000 Head		1
ARG	c099	1016	Goats	Live animals	1000 Head		1
ARG	c100	1034	Pigs	Live animals	1000 Head		1
ARG	c101	2029	Poultry Birds	Live animals	1000 Head		1
ARG	c102	1096	Horses	Live animals	1000 Head		1
ARG	c103	1107	Asses	Live animals	1000 Head		1
ARG	c104	1110	Mules	Live animals	1000 Head		1
ARG	c105	1126	Camels	Live animals	1000 Head		1
ARG	c106	1157	Camelids, other	Live animals	1000 Head		1
ARG	c107	1140	Rabbits and hares	Live animals	1000 Head		1
ARG	c108	1150	Rodents, other	Live animals	1000 Head		1
ARG	c112	2746	Wool (Clean Eq.)	Hides, skins, wool	tonnes		1
ARG	c120	2748	Hides and skins	Hides, skins, wool	tonnes		1
ARG	c122	2747	Silk	Hides, skins, wool	tonnes		1
BWA	c001	2807	Rice and products	Cereals	tonnes	2.40154	0.9702
BWA	c002	2511	Wheat and products	Cereals	tonnes	2.76243	0.9702
BWA	c003	2513	Barley and products	Cereals	tonnes	2.01239	0.831393
BWA	c004	2514	Maize and products	Cereals	tonnes	2.96976	0.9702
BWA	c005	2515	Rye and products	Cereals	tonnes	2.56517	0.7913
BWA	c006	2516	Oats	Cereals	tonnes	1.98575	0.844355
BWA	c007	2517	Millet and products	Cereals	tonnes	2.92513	0.9702
BWA	c008	2518	Sorghum and products	Cereals	tonnes	3.0462	0.9702
BWA	c009	2520	Cereals, Other	Cereals	tonnes	2.67961	0.9702
BWA	c010	2531	Potatoes and products	Roots and tubers	tonnes	0.67692	0.9506
BWA	c011	2532	Cassava and products	Roots and tubers	tonnes	1.09645	0.922469
BWA	c013	2534	Roots, Other	Roots and tubers	tonnes	0.847877	0.9506
BWA	c014	2535	Yams	Roots and tubers	tonnes	0.873362	0.930556
BWA	c012	2533	Sweet potatoes	Roots and tubers	tonnes	0.65463	0.9506
BWA	c031	2601	Tomatoes and products	Vegetables, fruit, nuts, pulses, spices	tonnes	0.195311	0.789525
BWA	c032	2602	Onions	Vegetables, fruit, nuts, pulses, spices	tonnes	0.378333	0.789525
BWA	c033	2605	Vegetables, Other	Vegetables, fruit, nuts, pulses, spices	tonnes	0.249499	0.789525
BWA	c049	2640	Pepper	Vegetables, fruit, nuts, pulses, spices	tonnes	3.1556	0.789525
BWA	c050	2641	Pimento	Vegetables, fruit, nuts, pulses, spices	tonnes	3.18772	0.789525
BWA	c051	2642	Cloves	Vegetables, fruit, nuts, pulses, spices	tonnes	2.77415	0.849884
BWA	c052	2645	Spices, Other	Vegetables, fruit, nuts, pulses, spices	tonnes	3.16983	0.789525
BWA	c034	2611	Oranges, Mandarines	Vegetables, fruit, nuts, pulses, spices	tonnes	0.154027	0.789525
BWA	c035	2612	Lemons, Limes and products	Vegetables, fruit, nuts, pulses, spices	tonnes	0.165963	0.789525
BWA	c036	2613	Grapefruit and products	Vegetables, fruit, nuts, pulses, spices	tonnes	0.220143	0.789525
BWA	c037	2614	Citrus, Other	Vegetables, fruit, nuts, pulses, spices	tonnes	0.589499	0.789525
BWA	c038	2615	Bananas	Vegetables, fruit, nuts, pulses, spices	tonnes	0.6483	0.789525
BWA	c039	2616	Plantains	Vegetables, fruit, nuts, pulses, spices	tonnes	0.875038	0.859938
BWA	c040	2617	Apples and products	Vegetables, fruit, nuts, pulses, spices	tonnes	0.355613	0.789525
BWA	c041	2618	Pineapples and products	Vegetables, fruit, nuts, pulses, spices	tonnes	0.221283	0.789525
BWA	c042	2619	Dates	Vegetables, fruit, nuts, pulses, spices	tonnes	2.04164	0.789525
BWA	c043	2620	Grapes and products (excl wine)	Vegetables, fruit, nuts, pulses, spices	tonnes	0.642337	0.789525
BWA	c044	2625	Fruits, Other	Vegetables, fruit, nuts, pulses, spices	tonnes	0.5597	0.789525
BWA	c109	2848	Milk - Excluding Butter	Milk	tonnes	0.839129	0.8991
BWA	c110	2740	Butter, Ghee	Milk	tonnes	6.8253	0.8991
BWA	c113	2731	Bovine Meat	Meat	tonnes	1.4423	0.9114
BWA	c114	2732	Mutton & Goat Meat	Meat	tonnes	1.42923	0.9114
BWA	c115	2733	Pigmeat	Meat	tonnes	2.76328	0.9114
BWA	c017	2546	Beans	Vegetables, fruit, nuts, pulses, spices	tonnes	3.20596	0.9702
BWA	c018	2547	Peas	Vegetables, fruit, nuts, pulses, spices	tonnes	3.1937	0.9702
BWA	c019	2549	Pulses, Other and products	Vegetables, fruit, nuts, pulses, spices	tonnes	3.10683	0.9702
BWA	c020	2551	Nuts and products	Vegetables, fruit, nuts, pulses, spices	tonnes	1.26025	0.9702
BWA	c021	2555	Soyabeans	Oil crops	tonnes	3.37539	0.9702
BWA	c022	2552	Groundnuts	Oil crops	tonnes	1.55989	0.9702
BWA	c023	2557	Sunflower seed	Oil crops	tonnes	4.3332	0.959822
BWA	c026	2560	Coconuts - Incl Copra	Oil crops	tonnes	0.91337	0.9702
BWA	c027	2561	Sesame seed	Oil crops	tonnes	5.50659	0.958641
BWA	c030	2570	Oilcrops, Other	Oil crops	tonnes	4.66542	0.953733
BWA	c111	2744	Eggs	Eggs	tonnes	1.36015	0.9603
BWA	c116	2734	Poultry Meat	Meat	tonnes	1.4369	0.9114
BWA	c123	2960	Fish, Seafood	Fish	tonnes	0.816927	0.8562
BWA	c074	2577	Palm Oil	Vegetable oils	tonnes	2.53265	0.9702
BWA	c068	2571	Soyabean Oil	Vegetable oils	tonnes	11.9346	0.959171
BWA	c069	2572	Groundnut Oil	Vegetable oils	tonnes	6.69306	0.9702
BWA	c070	2573	Sunflowerseed Oil	Vegetable oils	tonnes	8.94882	0.9702
BWA	c071	2574	Rape and Mustard Oil	Vegetable oils	tonnes	6.84372	0.958914
BWA	c072	2575	Cottonseed Oil	Vegetable oils	tonnes	5.41061	0.9702
BWA	c073	2576	Palmkernel Oil	Vegetable oils	tonnes	4.59511	0.96095
BWA	c075	2578	Coconut Oil	Vegetable oils	tonnes	8.0694	0.959969
BWA	c076	2579	Sesameseed Oil	Vegetable oils	tonnes	8.91304	0.961456
BWA	c077	2580	Olive Oil	Vegetable oils	tonnes	8.65455	0.9702
BWA	c078	2581	Ricebran Oil	Vegetable oils	tonnes	9.53884	0.960333
BWA	c079	2582	Maize Germ Oil	Vegetable oils	tonnes	8.0303	0.9702
BWA	c080	2586	Oilcrops Oil, Other	Vegetable oils	tonnes	8.69792	0.9702
BWA	c119	2737	Fats, Animals, Raw	Animal fats	tonnes	7.61743	0.9114
BWA	c015	2536	Sugar cane	Sugar crops	tonnes	0.246434	1
BWA	c016	2537	Sugar beet	Sugar crops	tonnes	0.560855	1
BWA	c065	2541	Sugar non-centrifugal	Sugar, sweeteners	tonnes	3.78389	0.94335
BWA	c066	2542	Sugar (Raw Equivalent)	Sugar, sweeteners	tonnes	3.63154	0.94335
BWA	c067	2543	Sweeteners, Other	Sugar, sweeteners	tonnes	0.391765	0.94335
BWA	c121	2745	Honey	Honey	tonnes	3.19979	0.94335
BWA	c045	2630	Coffee and products	Coffee, tea, cocoa	tonnes	0.444322	1
BWA	c046	2633	Cocoa Beans and products	Coffee, tea, cocoa	tonnes	12.6408	1
BWA	c047	2635	Tea (including mate)	Coffee, tea, cocoa	tonnes	0.142841	1
BWA	c090	2655	Wine	Alcohol	tonnes	0.827141	1
BWA	c091	2656	Beer	Alcohol	tonnes	0.436288	1
BWA	c092	2657	Beverages, Fermented	Alcohol	tonnes	0.536478	1
BWA	c093	2658	Beverages, Alcoholic	Alcohol	tonnes	3.03804	1
BWA	c117	2735	Meat, Other	Meat	tonnes	1.34249	0.9114
BWA	c118	2736	Offals, Edible	Meat	tonnes	1.19284	0.9114
BWA	c024	2558	Rape and Mustardseed	Oil crops	tonnes	0.976174	0.951511
BWA	c025	328	Seed cotton	Oil crops	tonnes		1
BWA	c028	254	Oil, palm fruit	Oil crops	tonnes		1
BWA	c029	2563	Olives (including preserved)	Oil crops	tonnes	0.989552	0.9702
BWA	c048	677	Hops	Vegetables, fruit, nuts, pulses, spices	tonnes		1
BWA	c053	2662	Jute	Fibre crops	tonnes		1
BWA	c054	2663	Jute-Like Fibres	Fibre crops	tonnes		1
BWA	c055	2664	Soft-Fibres, Other	Fibre crops	tonnes		1
BWA	c056	2665	Sisal	Fibre crops	tonnes		1
BWA	c057	2666	Abaca	Fibre crops	tonnes		1
BWA	c058	2667	Hard Fibres, Other	Fibre crops	tonnes		1
BWA	c059	2671	Tobacco	Tobacco, rubber	tonnes		1
BWA	c060	2672	Rubber	Tobacco, rubber	tonnes		1
BWA	c061	2000	Fodder crops	Fodder crops	tonnes		1
BWA	c062	2001	Grazing	Grazing	tonnes		1
BWA	c063	2559	Cottonseed	Fibre crops	tonnes	4.90679	1
BWA	c064	2562	Palm kernels	Oil crops	tonnes		1
BWA	c081	2590	Soyabean Cake	Oil cakes	tonnes		1
BWA	c082	2591	Groundnut Cake	Oil cakes	tonnes		1
BWA	c083	2592	Sunflowerseed Cake	Oil cakes	tonnes		1
BWA	c084	2593	Rape and Mustard Cake	Oil cakes	tonnes		1
BWA	c085	2594	Cottonseed Cake	Oil cakes	tonnes		1
BWA	c086	2595	Palmkernel Cake	Oil cakes	tonnes		1
BWA	c087	2596	Copra Cake	Oil cakes	tonnes		1
BWA	c088	2597	Sesameseed Cake	Oil cakes	tonnes		1
BWA	c089	2598	Oilseed Cakes, Other	Oil cakes	tonnes		1
BWA	c094	2659	Alcohol, Non-Food	Ethanol	tonnes		1
BWA	c095	2661	Cotton lint	Fibre crops	tonnes		1
BWA	c096	866	Cattle	Live animals	1000 Head		1
BWA	c097	946	Buffaloes	Live animals	1000 Head		1
BWA	c098	976	Sheep	Live animals	1000 Head		1
BWA	c099	1016	Goats	Live animals	1000 Head		1
BWA	c100	1034	Pigs	Live animals	1000 Head		1
BWA	c101	2029	Poultry Birds	Live animals	1000 Head		1
BWA	c102	1096	Horses	Live animals	1000 Head		1
BWA	c103	1107	Asses	Live animals	1000 Head		1
BWA	c104	1110	Mules	Live animals	1000 Head		1
BWA	c105	1126	Camels	Live animals	1000 Head		1
BWA	c106	1157	Camelids, other	Live animals	1000 Head		1
BWA	c107	1140	Rabbits and hares	Live animals	1000 Head		1
BWA	c108	1150	Rodents, other	Live animals	1000 Head		1
BWA	c112	2746	Wool (Clean Eq.)	Hides, skins, wool	tonnes		1
BWA	c120	2748	Hides and skins	Hides, skins, wool	tonnes		1
BWA	c122	2747	Silk	Hides, skins, wool	tonnes		1
BRA	c001	2807	Rice and products	Cereals	tonnes	2.43366	0.864
BRA	c002	2511	Wheat and products	Cereals	tonnes	2.47799	0.864
BRA	c003	2513	Barley and products	Cereals	tonnes	2.01239	0.831393
BRA	c004	2514	Maize and products	Cereals	tonnes	3.02716	0.864
BRA	c005	2515	Rye and products	Cereals	tonnes	3.49138	0.864
BRA	c006	2516	Oats	Cereals	tonnes	1.7069	0.864
BRA	c007	2517	Millet and products	Cereals	tonnes	3.09914	0.89695
BRA	c008	2518	Sorghum and products	Cereals	tonnes	3.33564	0.876178
BRA	c009	2520	Cereals, Other	Cereals	tonnes	2.91361	0.864
BRA	c010	2531	Potatoes and products	Roots and tubers	tonnes	0.593618	0.94672
BRA	c011	2532	Cassava and products	Roots and tubers	tonnes	1.06487	0.94672
BRA	c013	2534	Roots, Other	Roots and tubers	tonnes	0.863013	0.922897
BRA	c014	2535	Yams	Roots and tubers	tonnes	0.892857	0.94672
BRA	c012	2533	Sweet potatoes	Roots and tubers	tonnes	0.976393	0.94672
BRA	c031	2601	Tomatoes and products	Vegetables, fruit, nuts, pulses, spices	tonnes	0.198102	0.8811
BRA	c032	2602	Onions	Vegetables, fruit, nuts, pulses, spices	tonnes	0.38963	0.8811
BRA	c033	2605	Vegetables, Other	Vegetables, fruit, nuts, pulses, spices	tonnes	0.293245	0.8811
BRA	c049	2640	Pepper	Vegetables, fruit, nuts, pulses, spices	tonnes	2.90948	0.8811
BRA	c050	2641	Pimento	Vegetables, fruit, nuts, pulses, spices	tonnes	3.88319	0.830619
BRA	c051	2642	Cloves	Vegetables, fruit, nuts, pulses, spices	tonnes	2.77415	0.849884
BRA	c052	2645	Spices, Other	Vegetables, fruit, nuts, pulses, spices	tonnes	3.33125	0.8811
BRA	c034	2611	Oranges, Mandarines	Vegetables, fruit, nuts, pulses, spices	tonnes	0.287711	0.8811
BRA	c035	2612	Lemons, Limes and products	Vegetables, fruit, nuts, pulses, spices	tonnes	0.25177	0.8811
BRA	c036	2613	Grapefruit and products	Vegetables, fruit, nuts, pulses, spices	tonnes	0.221675	0.8811
BRA	c037	2614	Citrus, Other	Vegetables, fruit, nuts, pulses, spices	tonnes	0.581897	0.8811
BRA	c038	2615	Bananas	Vegetables, fruit, nuts, pulses, spices	tonnes	0.657207	0.8811
BRA	c039	2616	Plantains	Vegetables, fruit, nuts, pulses, spices	tonnes	0.743545	0.859938
BRA	c040	2617	Apples and products	Vegetables, fruit, nuts, pulses, spices	tonnes	0.502917	0.8811
BRA	c041	2618	Pineapples and products	Vegetables, fruit, nuts, pulses, spices	tonnes	0.298067	0.8811
BRA	c042	2619	Dates	Vegetables, fruit, nuts, pulses, spices	tonnes	2.32992	0.816697
BRA	c043	2620	Grapes and products (excl wine)	Vegetables, fruit, nuts, pulses, spices	tonnes	0.655851	0.8811
BRA	c044	2625	Fruits, Other	Vegetables, fruit, nuts, pulses, spices	tonnes	0.459707	0.8811
BRA	c109	2848	Milk - Excluding Butter	Milk	tonnes	0.686863	0.8832
BRA	c110	2740	Butter, Ghee	Milk	tonnes	7.42912	0.8832
BRA	c113	2731	Bovine Meat	Meat	tonnes	1.61465	0.893
BRA	c114	2732	Mutton & Goat Meat	Meat	tonnes	1.94507	0.893
BRA	c115	2733	Pigmeat	Meat	tonnes	2.29748	0.893
BRA	c017	2546	Beans	Vegetables, fruit, nuts, pulses, spices	tonnes	3.15022	0.9604
BRA	c018	2547	Peas	Vegetables, fruit, nuts, pulses, spices	tonnes	3.22298	0.9604
BRA	c019	2549	Pulses, Other and products	Vegetables, fruit, nuts, pulses, spices	tonnes	3.28275	0.9604
BRA	c020	2551	Nuts and products	Vegetables, fruit, nuts, pulses, spices	tonnes	1.72056	0.9604
BRA	c021	2555	Soyabeans	Oil crops	tonnes	3.64044	0.958888
BRA	c022	2552	Groundnuts	Oil crops	tonnes	4.08348	0.9604
BRA	c023	2557	Sunflower seed	Oil crops	tonnes	4.07429	0.9604
BRA	c026	2560	Coconuts - Incl Copra	Oil crops	tonnes	0.859768	0.9604
BRA	c027	2561	Sesame seed	Oil crops	tonnes	5.94927	0.9604
BRA	c030	2570	Oilcrops, Other	Oil crops	tonnes	4.66542	0.9604
BRA	c111	2744	Eggs	Eggs	tonnes	1.30099	0.9216
BRA	c116	2734	Poultry Meat	Meat	tonnes	1.36622	0.893
BRA	c123	2960	Fish, Seafood	Fish	tonnes	0.627638	0.8908
BRA	c074	2577	Palm Oil	Vegetable oils	tonnes	8.90294	0.9604
BRA	c068	2571	Soyabean Oil	Vegetable oils	tonnes	7.21702	0.9604
BRA	c069	2572	Groundnut Oil	Vegetable oils	tonnes	8.53448	0.9604
BRA	c070	2573	Sunflowerseed Oil	Vegetable oils	tonnes	8.95403	0.9604
BRA	c071	2574	Rape and Mustard Oil	Vegetable oils	tonnes	5.25443	0.958914
BRA	c072	2575	Cottonseed Oil	Vegetable oils	tonnes	8.96888	0.9604
BRA	c073	2576	Palmkernel Oil	Vegetable oils	tonnes	4.59511	0.96095
BRA	c075	2578	Coconut Oil	Vegetable oils	tonnes	9.18881	0.9604
BRA	c076	2579	Sesameseed Oil	Vegetable oils	tonnes	8.52596	0.961456
BRA	c077	2580	Olive Oil	Vegetable oils	tonnes	9.01147	0.9604
BRA	c078	2581	Ricebran Oil	Vegetable oils	tonnes	9.17343	0.9604
BRA	c079	2582	Maize Germ Oil	Vegetable oils	tonnes	5.4513	0.9604
BRA	c080	2586	Oilcrops Oil, Other	Vegetable oils	tonnes	7.45487	0.9604
BRA	c119	2737	Fats, Animals, Raw	Animal fats	tonnes	9.12184	0.893
BRA	c015	2536	Sugar cane	Sugar crops	tonnes	0.329103	1
BRA	c016	2537	Sugar beet	Sugar crops	tonnes	0.560855	1
BRA	c065	2541	Sugar non-centrifugal	Sugar, sweeteners	tonnes	3.80804	0.94335
BRA	c066	2542	Sugar (Raw Equivalent)	Sugar, sweeteners	tonnes	3.66011	0.94335
BRA	c067	2543	Sweeteners, Other	Sugar, sweeteners	tonnes	0.721132	0.94335
BRA	c121	2745	Honey	Honey	tonnes	3.36207	0.94335
BRA	c045	2630	Coffee and products	Coffee, tea, cocoa	tonnes	0.290275	1
BRA	c046	2633	Cocoa Beans and products	Coffee, tea, cocoa	tonnes	1.65716	1
BRA	c047	2635	Tea (including mate)	Coffee, tea, cocoa	tonnes	0.137393	1
BRA	c090	2655	Wine	Alcohol	tonnes	0.797465	1
BRA	c091	2656	Beer	Alcohol	tonnes	0.438688	1
BRA	c092	2657	Beverages, Fermented	Alcohol	tonnes	0.495223	1
BRA	c093	2658	Beverages, Alcoholic	Alcohol	tonnes	2.8262	1
BRA	c117	2735	Meat, Other	Meat	tonnes	2.63054	0.893
BRA	c118	2736	Offals, Edible	Meat	tonnes	0.926906	0.893
BRA	c024	2558	Rape and Mustardseed	Oil crops	tonnes	1.81155	0.951511
BRA	c025	328	Seed cotton	Oil crops	tonnes		1
BRA	c028	254	Oil, palm fruit	Oil crops	tonnes		1
BRA	c029	2563	Olives (including preserved)	Oil crops	tonnes	0.396916	0.9604
BRA	c048	677	Hops	Vegetables, fruit, nuts, pulses, spices	tonnes		1
BRA	c053	2662	Jute	Fibre crops	tonnes		1
BRA	c054	2663	Jute-Like Fibres	Fibre crops	tonnes		1
BRA	c055	2664	Soft-Fibres, Other	Fibre crops	tonnes		1
BRA	c056	2665	Sisal	Fibre crops	tonnes		1
BRA	c057	2666	Abaca	Fibre crops	tonnes		1
BRA	c058	2667	Hard Fibres, Other	Fibre crops	tonnes		1
BRA	c059	2671	Tobacco	Tobacco, rubber	tonnes		1
BRA	c060	2672	Rubber	Tobacco, rubber	tonnes		1
BRA	c061	2000	Fodder crops	Fodder crops	tonnes		1
BRA	c062	2001	Grazing	Grazing	tonnes		1
BRA	c063	2559	Cottonseed	Fibre crops	tonnes	4.90679	1
BRA	c064	2562	Palm kernels	Oil crops	tonnes		1
BRA	c081	2590	Soyabean Cake	Oil cakes	tonnes		1
BRA	c082	2591	Groundnut Cake	Oil cakes	tonnes		1
BRA	c083	2592	Sunflowerseed Cake	Oil cakes	tonnes		1
BRA	c084	2593	Rape and Mustard Cake	Oil cakes	tonnes		1
BRA	c085	2594	Cottonseed Cake	Oil cakes	tonnes		1
BRA	c086	2595	Palmkernel Cake	Oil cakes	tonnes		1
BRA	c087	2596	Copra Cake	Oil cakes	tonnes		1
BRA	c088	2597	Sesameseed Cake	Oil cakes	tonnes		1
BRA	c089	2598	Oilseed Cakes, Other	Oil cakes	tonnes		1
BRA	c094	2659	Alcohol, Non-Food	Ethanol	tonnes		1
BRA	c095	2661	Cotton lint	Fibre crops	tonnes		1
BRA	c096	866	Cattle	Live animals	1000 Head		1
BRA	c097	946	Buffaloes	Live animals	1000 Head		1
BRA	c098	976	Sheep	Live animals	1000 Head		1
BRA	c099	1016	Goats	Live animals	1000 Head		1
BRA	c100	1034	Pigs	Live animals	1000 Head		1
BRA	c101	2029	Poultry Birds	Live animals	1000 Head		1
BRA	c102	1096	Horses	Live animals	1000 Head		1
BRA	c103	1107	Asses	Live animals	1000 Head		1
BRA	c104	1110	Mules	Live animals	1000 Head		1
BRA	c105	1126	Camels	Live animals	1000 Head		1
BRA	c106	1157	Camelids, other	Live animals	1000 Head		1
BRA	c107	1140	Rabbits and hares	Live animals	1000 Head		1
BRA	c108	1150	Rodents, other	Live animals	1000 Head		1
BRA	c112	2746	Wool (Clean Eq.)	Hides, skins, wool	tonnes		1
BRA	c120	2748	Hides and skins	Hides, skins, wool	tonnes		1
BRA	c122	2747	Silk	Hides, skins, wool	tonnes		1
BLZ	c001	2807	Rice and products	Cereals	tonnes	2.27959	0.864
BLZ	c002	2511	Wheat and products	Cereals	tonnes	2.17962	0.864
BLZ	c003	2513	Barley and products	Cereals	tonnes	2.01239	0.831393
BLZ	c004	2514	Maize and products	Cereals	tonnes	3.07547	0.864
BLZ	c005	2515	Rye and products	Cereals	tonnes	2.56517	0.7913
BLZ	c006	2516	Oats	Cereals	tonnes	1.79501	0.864
BLZ	c007	2517	Millet and products	Cereals	tonnes	3.09914	0.89695
BLZ	c008	2518	Sorghum and products	Cereals	tonnes	5.08772	0.864
BLZ	c009	2520	Cereals, Other	Cereals	tonnes	2.19011	0.864
BLZ	c010	2531	Potatoes and products	Roots and tubers	tonnes	0.589827	0.94672
BLZ	c011	2532	Cassava and products	Roots and tubers	tonnes	0.779201	0.94672
BLZ	c013	2534	Roots, Other	Roots and tubers	tonnes	0.863013	0.94672
BLZ	c014	2535	Yams	Roots and tubers	tonnes	0.873362	0.94672
BLZ	c012	2533	Sweet potatoes	Roots and tubers	tonnes	0.887849	0.94672
BLZ	c031	2601	Tomatoes and products	Vegetables, fruit, nuts, pulses, spices	tonnes	0.169018	0.8811
BLZ	c032	2602	Onions	Vegetables, fruit, nuts, pulses, spices	tonnes	0.409551	0.8811
BLZ	c033	2605	Vegetables, Other	Vegetables, fruit, nuts, pulses, spices	tonnes	0.286837	0.8811
BLZ	c049	2640	Pepper	Vegetables, fruit, nuts, pulses, spices	tonnes	3.1556	0.8811
BLZ	c050	2641	Pimento	Vegetables, fruit, nuts, pulses, spices	tonnes	3.18772	0.8811
BLZ	c051	2642	Cloves	Vegetables, fruit, nuts, pulses, spices	tonnes	2.77415	0.849884
BLZ	c052	2645	Spices, Other	Vegetables, fruit, nuts, pulses, spices	tonnes	2.43217	0.8811
BLZ	c034	2611	Oranges, Mandarines	Vegetables, fruit, nuts, pulses, spices	tonnes	0.181909	0.8811
BLZ	c035	2612	Lemons, Limes and products	Vegetables, fruit, nuts, pulses, spices	tonnes	0.285822	0.836167
BLZ	c036	2613	Grapefruit and products	Vegetables, fruit, nuts, pulses, spices	tonnes	0.147174	0.8811
BLZ	c037	2614	Citrus, Other	Vegetables, fruit, nuts, pulses, spices	tonnes	0.55407	0.835814
BLZ	c038	2615	Bananas	Vegetables, fruit, nuts, pulses, spices	tonnes	0.656386	0.837291
BLZ	c039	2616	Plantains	Vegetables, fruit, nuts, pulses, spices	tonnes	0.787795	0.8811
BLZ	c040	2617	Apples and products	Vegetables, fruit, nuts, pulses, spices	tonnes	0.208108	0.8811
BLZ	c041	2618	Pineapples and products	Vegetables, fruit, nuts, pulses, spices	tonnes	0.145384	0.8811
BLZ	c042	2619	Dates	Vegetables, fruit, nuts, pulses, spices	tonnes	2.04164	0.8811
BLZ	c043	2620	Grapes and products (excl wine)	Vegetables, fruit, nuts, pulses, spices	tonnes	0.61139	0.8811
BLZ	c044	2625	Fruits, Other	Vegetables, fruit, nuts, pulses, spices	tonnes	0.393353	0.8811
BLZ	c109	2848	Milk - Excluding Butter	Milk	tonnes	2.28291	0.8832
BLZ	c110	2740	Butter, Ghee	Milk	tonnes	7.54735	0.8832
BLZ	c113	2731	Bovine Meat	Meat	tonnes	1.85338	0.893
BLZ	c114	2732	Mutton & Goat Meat	Meat	tonnes	2.0699	0.893
BLZ	c115	2733	Pigmeat	Meat	tonnes	2.51729	0.893
BLZ	c017	2546	Beans	Vegetables, fruit, nuts, pulses, spices	tonnes	4.0863	0.9604
BLZ	c018	2547	Peas	Vegetables, fruit, nuts, pulses, spices	tonnes	2.80383	0.9604
BLZ	c019	2549	Pulses, Other and products	Vegetables, fruit, nuts, pulses, spices	tonnes	3.25314	0.9604
BLZ	c020	2551	Nuts and products	Vegetables, fruit, nuts, pulses, spices	tonnes	2.11137	0.9604
BLZ	c021	2555	Soyabeans	Oil crops	tonnes	2.58683	0.9604
BLZ	c022	2552	Groundnuts	Oil crops	tonnes	1.37351	0.9604
BLZ	c023	2557	Sunflower seed	Oil crops	tonnes	4.64089	0.9604
BLZ	c026	2560	Coconuts - Incl Copra	Oil crops	tonnes	0.982595	0.9604
BLZ	c027	2561	Sesame seed	Oil crops	tonnes	5.50659	0.9604
BLZ	c030	2570	Oilcrops, Other	Oil crops	tonnes	4.66542	0.953733
BLZ	c111	2744	Eggs	Eggs	tonnes	1.24543	0.9216
BLZ	c116	2734	Poultry Meat	Meat	tonnes	1.32024	0.893
BLZ	c123	2960	Fish, Seafood	Fish	tonnes	0.473477	0.8908
BLZ	c074	2577	Palm Oil	Vegetable oils	tonnes	2.53265	0.962714
BLZ	c068	2571	Soyabean Oil	Vegetable oils	tonnes	4.63544	0.9604
BLZ	c069	2572	Groundnut Oil	Vegetable oils	tonnes	6.69306	0.961588
BLZ	c070	2573	Sunflowerseed Oil	Vegetable oils	tonnes	4.93797	0.9604
BLZ	c071	2574	Rape and Mustard Oil	Vegetable oils	tonnes	5.25443	0.958914
BLZ	c072	2575	Cottonseed Oil	Vegetable oils	tonnes	7.33575	0.962453
BLZ	c073	2576	Palmkernel Oil	Vegetable oils	tonnes	4.59511	0.96095
BLZ	c075	2578	Coconut Oil	Vegetable oils	tonnes	8.0694	0.9604
BLZ	c076	2579	Sesameseed Oil	Vegetable oils	tonnes	8.91304	0.9604
BLZ	c077	2580	Olive Oil	Vegetable oils	tonnes	5.97173	0.9604
BLZ	c078	2581	Ricebran Oil	Vegetable oils	tonnes	9.53884	0.960333
BLZ	c079	2582	Maize Germ Oil	Vegetable oils	tonnes	8.0303	0.9604
BLZ	c080	2586	Oilcrops Oil, Other	Vegetable oils	tonnes	9.69356	0.9604
BLZ	c119	2737	Fats, Animals, Raw	Animal fats	tonnes	7.37577	0.893
BLZ	c015	2536	Sugar cane	Sugar crops	tonnes	0.246434	1
BLZ	c016	2537	Sugar beet	Sugar crops	tonnes	0.560855	1
BLZ	c065	2541	Sugar non-centrifugal	Sugar, sweeteners	tonnes	3.78389	0.94335
BLZ	c066	2542	Sugar (Raw Equivalent)	Sugar, sweeteners	tonnes	3.62441	0.94335
BLZ	c067	2543	Sweeteners, Other	Sugar, sweeteners	tonnes	0.354294	0.94335
BLZ	c121	2745	Honey	Honey	tonnes	3.19979	0.94335
BLZ	c045	2630	Coffee and products	Coffee, tea, cocoa	tonnes	0.313977	1
BLZ	c046	2633	Cocoa Beans and products	Coffee, tea, cocoa	tonnes	5.7167	1
BLZ	c047	2635	Tea (including mate)	Coffee, tea, cocoa	tonnes	0.0944199	1
BLZ	c090	2655	Wine	Alcohol	tonnes	0.810524	1
BLZ	c091	2656	Beer	Alcohol	tonnes	0.438675	1
BLZ	c092	2657	Beverages, Fermented	Alcohol	tonnes	0.396366	1
BLZ	c093	2658	Beverages, Alcoholic	Alcohol	tonnes	2.5991	1
BLZ	c117	2735	Meat, Other	Meat	tonnes	1.39729	0.893
BLZ	c118	2736	Offals, Edible	Meat	tonnes	1.27994	0.893
BLZ	c024	2558	Rape and Mustardseed	Oil crops	tonnes	0.976174	0.951511
BLZ	c025	328	Seed cotton	Oil crops	tonnes		1
BLZ	c028	254	Oil, palm fruit	Oil crops	tonnes		1
BLZ	c029	2563	Olives (including preserved)	Oil crops	tonnes	0.989552	0.9604
BLZ	c048	677	Hops	Vegetables, fruit, nuts, pulses, spices	tonnes		1
BLZ	c053	2662	Jute	Fibre crops	tonnes		1
BLZ	c054	2663	Jute-Like Fibres	Fibre crops	tonnes		1
BLZ	c055	2664	Soft-Fibres, Other	Fibre crops	tonnes		1
BLZ	c056	2665	Sisal	Fibre crops	tonnes		1
BLZ	c057	2666	Abaca	Fibre crops	tonnes		1
BLZ	c058	2667	Hard Fibres, Other	Fibre crops	tonnes		1
BLZ	c059	2671	Tobacco	Tobacco, rubber	tonnes		1
BLZ	c060	2672	Rubber	Tobacco, rubber	tonnes		1
BLZ	c061	2000	Fodder crops	Fodder crops	tonnes		1
BLZ	c062	2001	Grazing	Grazing	tonnes		1
BLZ	c063	2559	Cottonseed	Fibre crops	tonnes	4.90679	1
BLZ	c064	2562	Palm kernels	Oil crops	tonnes		1
BLZ	c081	2590	Soyabean Cake	Oil cakes	tonnes		1
BLZ	c082	2591	Groundnut Cake	Oil cakes	tonnes		1
BLZ	c083	2592	Sunflowerseed Cake	Oil cakes	tonnes		1
BLZ	c084	2593	Rape and Mustard Cake	Oil cakes	tonnes		1
BLZ	c085	2594	Cottonseed Cake	Oil cakes	tonnes		1
BLZ	c086	2595	Palmkernel Cake	Oil cakes	tonnes		1
BLZ	c087	2596	Copra Cake	Oil cakes	tonnes		1
BLZ	c088	2597	Sesameseed Cake	Oil cakes	tonnes		1
BLZ	c089	2598	Oilseed Cakes, Other	Oil cakes	tonnes		1
BLZ	c094	2659	Alcohol, Non-Food	Ethanol	tonnes		1
BLZ	c095	2661	Cotton lint	Fibre crops	tonnes		1
BLZ	c096	866	Cattle	Live animals	1000 Head		1
BLZ	c097	946	Buffaloes	Live animals	1000 Head		1
BLZ	c098	976	Sheep	Live animals	1000 Head		1
BLZ	c099	1016	Goats	Live animals	1000 Head		1
BLZ	c100	1034	Pigs	Live animals	1000 Head		1
BLZ	c101	2029	Poultry Birds	Live animals	1000 Head		1
BLZ	c102	1096	Horses	Live animals	1000 Head		1
BLZ	c103	1107	Asses	Live animals	1000 Head		1
BLZ	c104	1110	Mules	Live animals	1000 Head		1
BLZ	c105	1126	Camels	Live animals	1000 Head		1
BLZ	c106	1157	Camelids, other	Live animals	1000 Head		1
BLZ	c107	1140	Rabbits and hares	Live animals	1000 Head		1
BLZ	c108	1150	Rodents, other	Live animals	1000 Head		1
BLZ	c112	2746	Wool (Clean Eq.)	Hides, skins, wool	tonnes		1
BLZ	c120	2748	Hides and skins	Hides, skins, wool	tonnes		1
BLZ	c122	2747	Silk	Hides, skins, wool	tonnes		1
BGR	c001	2807	Rice and products	Cereals	tonnes	2.78739	0.735
BGR	c002	2511	Wheat and products	Cereals	tonnes	2.45472	0.735
BGR	c003	2513	Barley and products	Cereals	tonnes	0.00502185	0.735
BGR	c004	2514	Maize and products	Cereals	tonnes	1.6505	0.735
BGR	c005	2515	Rye and products	Cereals	tonnes	2.44625	0.735
BGR	c006	2516	Oats	Cereals	tonnes	1.85318	0.735
BGR	c007	2517	Millet and products	Cereals	tonnes	3.09914	0.89695
BGR	c008	2518	Sorghum and products	Cereals	tonnes	3.33564	0.876178
BGR	c009	2520	Cereals, Other	Cereals	tonnes	3.87308	0.735
BGR	c010	2531	Potatoes and products	Roots and tubers	tonnes	0.609088	0.831541
BGR	c011	2532	Cassava and products	Roots and tubers	tonnes	1.09645	0.922469
BGR	c013	2534	Roots, Other	Roots and tubers	tonnes	0.863013	0.922897
BGR	c014	2535	Yams	Roots and tubers	tonnes	0.873362	0.930556
BGR	c012	2533	Sweet potatoes	Roots and tubers	tonnes	0.887849	0.831541
BGR	c031	2601	Tomatoes and products	Vegetables, fruit, nuts, pulses, spices	tonnes	0.200683	0.7914
BGR	c032	2602	Onions	Vegetables, fruit, nuts, pulses, spices	tonnes	0.336724	0.7914
BGR	c033	2605	Vegetables, Other	Vegetables, fruit, nuts, pulses, spices	tonnes	0.322196	0.7914
BGR	c049	2640	Pepper	Vegetables, fruit, nuts, pulses, spices	tonnes	3.1556	0.835814
BGR	c050	2641	Pimento	Vegetables, fruit, nuts, pulses, spices	tonnes	3.21901	0.7914
BGR	c051	2642	Cloves	Vegetables, fruit, nuts, pulses, spices	tonnes	2.77415	0.849884
BGR	c052	2645	Spices, Other	Vegetables, fruit, nuts, pulses, spices	tonnes	2.48551	0.7914
BGR	c034	2611	Oranges, Mandarines	Vegetables, fruit, nuts, pulses, spices	tonnes	0.284457	0.7914
BGR	c035	2612	Lemons, Limes and products	Vegetables, fruit, nuts, pulses, spices	tonnes	0.266038	0.7914
BGR	c036	2613	Grapefruit and products	Vegetables, fruit, nuts, pulses, spices	tonnes	0.215253	0.7914
BGR	c037	2614	Citrus, Other	Vegetables, fruit, nuts, pulses, spices	tonnes	0.845587	0.7914
BGR	c038	2615	Bananas	Vegetables, fruit, nuts, pulses, spices	tonnes	0.664262	0.7914
BGR	c039	2616	Plantains	Vegetables, fruit, nuts, pulses, spices	tonnes	0.733483	0.7914
BGR	c040	2617	Apples and products	Vegetables, fruit, nuts, pulses, spices	tonnes	0.314111	0.7914
BGR	c041	2618	Pineapples and products	Vegetables, fruit, nuts, pulses, spices	tonnes	0.210158	0.7914
BGR	c042	2619	Dates	Vegetables, fruit, nuts, pulses, spices	tonnes	1.92083	0.7914
BGR	c043	2620	Grapes and products (excl wine)	Vegetables, fruit, nuts, pulses, spices	tonnes	0.593634	0.7914
BGR	c044	2625	Fruits, Other	Vegetables, fruit, nuts, pulses, spices	tonnes	0.545082	0.7914
BGR	c109	2848	Milk - Excluding Butter	Milk	tonnes	0.878348	0.92535
BGR	c110	2740	Butter, Ghee	Milk	tonnes	7.18196	0.92535
BGR	c113	2731	Bovine Meat	Meat	tonnes	1.25367	0.8544
BGR	c114	2732	Mutton & Goat Meat	Meat	tonnes	2.09285	0.8544
BGR	c115	2733	Pigmeat	Meat	tonnes	1.64998	0.8544
BGR	c017	2546	Beans	Vegetables, fruit, nuts, pulses, spices	tonnes	3.02105	0.9504
BGR	c018	2547	Peas	Vegetables, fruit, nuts, pulses, spices	tonnes	2.59826	0.9504
BGR	c019	2549	Pulses, Other and products	Vegetables, fruit, nuts, pulses, spices	tonnes	3.5175	0.9504
BGR	c020	2551	Nuts and products	Vegetables, fruit, nuts, pulses, spices	tonnes	1.42324	0.9504
BGR	c021	2555	Soyabeans	Oil crops	tonnes	3.64044	0.9504
BGR	c022	2552	Groundnuts	Oil crops	tonnes	3.81934	0.9504
BGR	c023	2557	Sunflower seed	Oil crops	tonnes	4.65799	0.9504
BGR	c026	2560	Coconuts - Incl Copra	Oil crops	tonnes	1.13599	0.9504
BGR	c027	2561	Sesame seed	Oil crops	tonnes	5.31477	0.9504
BGR	c030	2570	Oilcrops, Other	Oil crops	tonnes	4.66542	0.953733
BGR	c111	2744	Eggs	Eggs	tonnes	1.25941	0.9016
BGR	c116	2734	Poultry Meat	Meat	tonnes	1.40151	0.8544
BGR	c123	2960	Fish, Seafood	Fish	tonnes	0.760297	0.853196
BGR	c074	2577	Palm Oil	Vegetable oils	tonnes	2.53265	0.962714
BGR	c068	2571	Soyabean Oil	Vegetable oils	tonnes	7.58693	0.9504
BGR	c069	2572	Groundnut Oil	Vegetable oils	tonnes	6.69306	0.961588
BGR	c070	2573	Sunflowerseed Oil	Vegetable oils	tonnes	8.11637	0.9504
BGR	c071	2574	Rape and Mustard Oil	Vegetable oils	tonnes	5.25443	0.958914
BGR	c072	2575	Cottonseed Oil	Vegetable oils	tonnes	7.33575	0.962453
BGR	c073	2576	Palmkernel Oil	Vegetable oils	tonnes	4.59511	0.96095
BGR	c075	2578	Coconut Oil	Vegetable oils	tonnes	8.0694	0.959969
BGR	c076	2579	Sesameseed Oil	Vegetable oils	tonnes	8.91304	0.961456
BGR	c077	2580	Olive Oil	Vegetable oils	tonnes	8.52134	0.9504
BGR	c078	2581	Ricebran Oil	Vegetable oils	tonnes	9.53884	0.960333
BGR	c079	2582	Maize Germ Oil	Vegetable oils	tonnes	8.61085	0.9504
BGR	c080	2586	Oilcrops Oil, Other	Vegetable oils	tonnes	8.51032	0.9504
BGR	c119	2737	Fats, Animals, Raw	Animal fats	tonnes	6.7917	0.8544
BGR	c015	2536	Sugar cane	Sugar crops	tonnes	0.246434	1
BGR	c016	2537	Sugar beet	Sugar crops	tonnes	0.560855	1
BGR	c065	2541	Sugar non-centrifugal	Sugar, sweeteners	tonnes	3.78389	0.94335
BGR	c066	2542	Sugar (Raw Equivalent)	Sugar, sweeteners	tonnes	3.6971	0.94335
BGR	c067	2543	Sweeteners, Other	Sugar, sweeteners	tonnes	0.542447	0.94335
BGR	c121	2745	Honey	Honey	tonnes	3.19979	0.94335
BGR	c045	2630	Coffee and products	Coffee, tea, cocoa	tonnes	0.302982	1
BGR	c046	2633	Cocoa Beans and products	Coffee, tea, cocoa	tonnes	1.87097	1
BGR	c047	2635	Tea (including mate)	Coffee, tea, cocoa	tonnes	0.0944199	1
BGR	c090	2655	Wine	Alcohol	tonnes	0.817735	1
BGR	c091	2656	Beer	Alcohol	tonnes	0.442633	1
BGR	c092	2657	Beverages, Fermented	Alcohol	tonnes	0.486853	1
BGR	c093	2658	Beverages, Alcoholic	Alcohol	tonnes	2.9351	1
BGR	c117	2735	Meat, Other	Meat	tonnes	1.12277	0.8544
BGR	c118	2736	Offals, Edible	Meat	tonnes	1.43342	0.8544
BGR	c024	2558	Rape and Mustardseed	Oil crops	tonnes	0.859689	0.951511
BGR	c025	328	Seed cotton	Oil crops	tonnes		1
BGR	c028	254	Oil, palm fruit	Oil crops	tonnes		1
BGR	c029	2563	Olives (including preserved)	Oil crops	tonnes	0.401644	0.9504
BGR	c048	677	Hops	Vegetables, fruit, nuts, pulses, spices	tonnes		1
BGR	c053	2662	Jute	Fibre crops	tonnes		1
BGR	c054	2663	Jute-Like Fibres	Fibre crops	tonnes		1
BGR	c055	2664	Soft-Fibres, Other	Fibre crops	tonnes		1
BGR	c056	2665	Sisal	Fibre crops	tonnes		1
BGR	c057	2666	Abaca	Fibre crops	tonnes		1
BGR	c058	2667	Hard Fibres, Other	Fibre crops	tonnes		1
BGR	c059	2671	Tobacco	Tobacco, rubber	tonnes		1
BGR	c060	2672	Rubber	Tobacco, rubber	tonnes		1
BGR	c061	2000	Fodder crops	Fodder crops	tonnes		1
BGR	c062	2001	Grazing	Grazing	tonnes		1
BGR	c063	2559	Cottonseed	Fibre crops	tonnes	4.90679	1
BGR	c064	2562	Palm kernels	Oil crops	tonnes		1
BGR	c081	2590	Soyabean Cake	Oil cakes	tonnes		1
BGR	c082	2591	Groundnut Cake	Oil cakes	tonnes		1
BGR	c083	2592	Sunflowerseed Cake	Oil cakes	tonnes		1
BGR	c084	2593	Rape and Mustard Cake	Oil cakes	tonnes		1
BGR	c085	2594	Cottonseed Cake	Oil cakes	tonnes		1
BGR	c086	2595	Palmkernel Cake	Oil cakes	tonnes		1
BGR	c087	2596	Copra Cake	Oil cakes	tonnes		1
BGR	c088	2597	Sesameseed Cake	Oil cakes	tonnes		1
BGR	c089	2598	Oilseed Cakes, Other	Oil cakes	tonnes		1
BGR	c094	2659	Alcohol, Non-Food	Ethanol	tonnes		1
BGR	c095	2661	Cotton lint	Fibre crops	tonnes		1
BGR	c096	866	Cattle	Live animals	1000 Head		1
BGR	c097	946	Buffaloes	Live animals	1000 Head		1
BGR	c098	976	Sheep	Live animals	1000 Head		1
BGR	c099	1016	Goats	Live animals	1000 Head		1
BGR	c100	1034	Pigs	Live animals	1000 Head		1
BGR	c101	2029	Poultry Birds	Live animals	1000 Head		1
BGR	c102	1096	Horses	Live animals	1000 Head		1
BGR	c103	1107	Asses	Live animals	1000 Head		1
BGR	c104	1110	Mules	Live animals	1000 Head		1
BGR	c105	1126	Camels	Live animals	1000 Head		1
BGR	c106	1157	Camelids, other	Live animals	1000 Head		1
BGR	c107	1140	Rabbits and hares	Live animals	1000 Head		1
BGR	c108	1150	Rodents, other	Live animals	1000 Head		1
BGR	c112	2746	Wool (Clean Eq.)	Hides, skins, wool	tonnes		1
BGR	c120	2748	Hides and skins	Hides, skins, wool	tonnes		1
BGR	c122	2747	Silk	Hides, skins, wool	tonnes		1
CHN	c001	2807	Rice and products	Cereals	tonnes	2.4056	0.784
CHN	c002	2511	Wheat and products	Cereals	tonnes	3.19097	0.784
CHN	c003	2513	Barley and products	Cereals	tonnes	1.95044	0.784
CHN	c004	2514	Maize and products	Cereals	tonnes	2.82137	0.784
CHN	c005	2515	Rye and products	Cereals	tonnes	2.44287	0.784
CHN	c006	2516	Oats	Cereals	tonnes	2.23073	0.784
CHN	c007	2517	Millet and products	Cereals	tonnes	2.81286	0.784
CHN	c008	2518	Sorghum and products	Cereals	tonnes	2.7822	0.784
CHN	c009	2520	Cereals, Other	Cereals	tonnes	2.90731	0.784
CHN	c010	2531	Potatoes and products	Roots and tubers	tonnes	0.645935	0.82419
CHN	c011	2532	Cassava and products	Roots and tubers	tonnes	1.20769	0.82419
CHN	c013	2534	Roots, Other	Roots and tubers	tonnes	0.987253	0.82419
CHN	c014	2535	Yams	Roots and tubers	tonnes	0.873362	0.930556
CHN	c012	2533	Sweet potatoes	Roots and tubers	tonnes	0.978835	0.82419
CHN	c031	2601	Tomatoes and products	Vegetables, fruit, nuts, pulses, spices	tonnes	0.204044	0.786784
CHN	c032	2602	Onions	Vegetables, fruit, nuts, pulses, spices	tonnes	0.390808	0.786784
CHN	c033	2605	Vegetables, Other	Vegetables, fruit, nuts, pulses, spices	tonnes	0.277408	0.786784
CHN	c049	2640	Pepper	Vegetables, fruit, nuts, pulses, spices	tonnes	3.0146	0.786784
CHN	c050	2641	Pimento	Vegetables, fruit, nuts, pulses, spices	tonnes	3.20555	0.786784
CHN	c051	2642	Cloves	Vegetables, fruit, nuts, pulses, spices	tonnes	3.46506	0.849884
CHN	c052	2645	Spices, Other	Vegetables, fruit, nuts, pulses, spices	tonnes	3.09517	0.786784
CHN	c034	2611	Oranges, Mandarines	Vegetables, fruit, nuts, pulses, spices	tonnes	0.355487	0.786784
CHN	c035	2612	Lemons, Limes and products	Vegetables, fruit, nuts, pulses, spices	tonnes	0.286004	0.786784
CHN	c036	2613	Grapefruit and products	Vegetables, fruit, nuts, pulses, spices	tonnes	0.229112	0.786784
CHN	c037	2614	Citrus, Other	Vegetables, fruit, nuts, pulses, spices	tonnes	0.61286	0.786784
CHN	c038	2615	Bananas	Vegetables, fruit, nuts, pulses, spices	tonnes	0.658781	0.786784
CHN	c039	2616	Plantains	Vegetables, fruit, nuts, pulses, spices	tonnes	0.743545	0.859938
CHN	c040	2617	Apples and products	Vegetables, fruit, nuts, pulses, spices	tonnes	0.520495	0.786784
CHN	c041	2618	Pineapples and products	Vegetables, fruit, nuts, pulses, spices	tonnes	0.266476	0.786784
CHN	c042	2619	Dates	Vegetables, fruit, nuts, pulses, spices	tonnes	2.02502	0.786784
CHN	c043	2620	Grapes and products (excl wine)	Vegetables, fruit, nuts, pulses, spices	tonnes	0.647596	0.786784
CHN	c044	2625	Fruits, Other	Vegetables, fruit, nuts, pulses, spices	tonnes	0.468825	0.786784
CHN	c109	2848	Milk - Excluding Butter	Milk	tonnes	0.866144	0.94525
CHN	c110	2740	Butter, Ghee	Milk	tonnes	7.60022	0.94525
CHN	c113	2731	Bovine Meat	Meat	tonnes	1.79023	0.8648
CHN	c114	2732	Mutton & Goat Meat	Meat	tonnes	1.77572	0.8648
CHN	c115	2733	Pigmeat	Meat	tonnes	2.31932	0.8648
CHN	c017	2546	Beans	Vegetables, fruit, nuts, pulses, spices	tonnes	3.15805	0.9504
CHN	c018	2547	Peas	Vegetables, fruit, nuts, pulses, spices	tonnes	2.56238	0.9504
CHN	c019	2549	Pulses, Other and products	Vegetables, fruit, nuts, pulses, spices	tonnes	3.23521	0.9504
CHN	c020	2551	Nuts and products	Vegetables, fruit, nuts, pulses, spices	tonnes	2.51937	0.9504
CHN	c021	2555	Soyabeans	Oil crops	tonnes	3.86347	0.9504
CHN	c022	2552	Groundnuts	Oil crops	tonnes	4.14749	0.9504
CHN	c023	2557	Sunflower seed	Oil crops	tonnes	4.64089	0.959822
CHN	c026	2560	Coconuts - Incl Copra	Oil crops	tonnes	0.973788	0.9504
CHN	c027	2561	Sesame seed	Oil crops	tonnes	5.84727	0.9504
CHN	c030	2570	Oilcrops, Other	Oil crops	tonnes	4.66542	0.953733
CHN	c111	2744	Eggs	Eggs	tonnes	1.31823	0.912
CHN	c116	2734	Poultry Meat	Meat	tonnes	1.67826	0.8648
CHN	c123	2960	Fish, Seafood	Fish	tonnes	0.563039	0.880912
CHN	c074	2577	Palm Oil	Vegetable oils	tonnes	6.55162	0.9504
CHN	c068	2571	Soyabean Oil	Vegetable oils	tonnes	2.53243	0.9504
CHN	c069	2572	Groundnut Oil	Vegetable oils	tonnes	4.3949	0.9504
CHN	c070	2573	Sunflowerseed Oil	Vegetable oils	tonnes	3.02153	0.9504
CHN	c071	2574	Rape and Mustard Oil	Vegetable oils	tonnes	3.0131	0.9504
CHN	c072	2575	Cottonseed Oil	Vegetable oils	tonnes	5.00843	0.9504
CHN	c073	2576	Palmkernel Oil	Vegetable oils	tonnes	2.08198	0.9504
CHN	c075	2578	Coconut Oil	Vegetable oils	tonnes	10.4923	0.9504
CHN	c076	2579	Sesameseed Oil	Vegetable oils	tonnes	10.5031	0.9504
CHN	c077	2580	Olive Oil	Vegetable oils	tonnes	9.45569	0.9504
CHN	c078	2581	Ricebran Oil	Vegetable oils	tonnes	10.5434	0.9504
CHN	c079	2582	Maize Germ Oil	Vegetable oils	tonnes	10.4966	0.9504
CHN	c080	2586	Oilcrops Oil, Other	Vegetable oils	tonnes	0.484347	0.9504
CHN	c119	2737	Fats, Animals, Raw	Animal fats	tonnes	7.10717	0.8648
CHN	c015	2536	Sugar cane	Sugar crops	tonnes	0.246434	1
CHN	c016	2537	Sugar beet	Sugar crops	tonnes	0.560855	1
CHN	c065	2541	Sugar non-centrifugal	Sugar, sweeteners	tonnes	3.80155	0.94335
CHN	c066	2542	Sugar (Raw Equivalent)	Sugar, sweeteners	tonnes	3.67723	0.94335
CHN	c067	2543	Sweeteners, Other	Sugar, sweeteners	tonnes	2.50431	0.94335
CHN	c121	2745	Honey	Honey	tonnes	3.27516	0.94335
CHN	c045	2630	Coffee and products	Coffee, tea, cocoa	tonnes	1.25182	1
CHN	c046	2633	Cocoa Beans and products	Coffee, tea, cocoa	tonnes	3.62704	1
CHN	c047	2635	Tea (including mate)	Coffee, tea, cocoa	tonnes	0.0322123	1
CHN	c090	2655	Wine	Alcohol	tonnes	0.805712	1
CHN	c091	2656	Beer	Alcohol	tonnes	0.439658	1
CHN	c092	2657	Beverages, Fermented	Alcohol	tonnes	0.549131	1
CHN	c093	2658	Beverages, Alcoholic	Alcohol	tonnes	2.82822	1
CHN	c117	2735	Meat, Other	Meat	tonnes	1.17999	0.8648
CHN	c118	2736	Offals, Edible	Meat	tonnes	1.36889	0.8648
CHN	c024	2558	Rape and Mustardseed	Oil crops	tonnes	2.6001	0.951511
CHN	c025	328	Seed cotton	Oil crops	tonnes		1
CHN	c028	254	Oil, palm fruit	Oil crops	tonnes		1
CHN	c029	2563	Olives (including preserved)	Oil crops	tonnes	0.989552	0.958902
CHN	c048	677	Hops	Vegetables, fruit, nuts, pulses, spices	tonnes		1
CHN	c053	2662	Jute	Fibre crops	tonnes		1
CHN	c054	2663	Jute-Like Fibres	Fibre crops	tonnes		1
CHN	c055	2664	Soft-Fibres, Other	Fibre crops	tonnes		1
CHN	c056	2665	Sisal	Fibre crops	tonnes		1
CHN	c057	2666	Abaca	Fibre crops	tonnes		1
CHN	c058	2667	Hard Fibres, Other	Fibre crops	tonnes		1
CHN	c059	2671	Tobacco	Tobacco, rubber	tonnes		1
CHN	c060	2672	Rubber	Tobacco, rubber	tonnes		1
CHN	c061	2000	Fodder crops	Fodder crops	tonnes		1
CHN	c062	2001	Grazing	Grazing	tonnes		1
CHN	c063	2559	Cottonseed	Fibre crops	tonnes	4.90679	1
CHN	c064	2562	Palm kernels	Oil crops	tonnes		1
CHN	c081	2590	Soyabean Cake	Oil cakes	tonnes		1
CHN	c082	2591	Groundnut Cake	Oil cakes	tonnes		1
CHN	c083	2592	Sunflowerseed Cake	Oil cakes	tonnes		1
CHN	c084	2593	Rape and Mustard Cake	Oil cakes	tonnes		1
CHN	c085	2594	Cottonseed Cake	Oil cakes	tonnes		1
CHN	c086	2595	Palmkernel Cake	Oil cakes	tonnes		1
CHN	c087	2596	Copra Cake	Oil cakes	tonnes		1
CHN	c088	2597	Sesameseed Cake	Oil cakes	tonnes		1
CHN	c089	2598	Oilseed Cakes, Other	Oil cakes	tonnes		1
CHN	c094	2659	Alcohol, Non-Food	Ethanol	tonnes		1
CHN	c095	2661	Cotton lint	Fibre crops	tonnes		1
CHN	c096	866	Cattle	Live animals	1000 Head		1
CHN	c097	946	Buffaloes	Live animals	1000 Head		1
CHN	c098	976	Sheep	Live animals	1000 Head		1
CHN	c099	1016	Goats	Live animals	1000 Head		1
CHN	c100	1034	Pigs	Live animals	1000 Head		1
CHN	c101	2029	Poultry Birds	Live animals	1000 Head		1
CHN	c102	1096	Horses	Live animals	1000 Head		1
CHN	c103	1107	Asses	Live animals	1000 Head		1
CHN	c104	1110	Mules	Live animals	1000 Head		1
CHN	c105	1126	Camels	Live animals	1000 Head		1
CHN	c106	1157	Camelids, other	Live animals	1000 Head		1
CHN	c107	1140	Rabbits and hares	Live animals	1000 Head		1
CHN	c108	1150	Rodents, other	Live animals	1000 Head		1
CHN	c112	2746	Wool (Clean Eq.)	Hides, skins, wool	tonnes		1
CHN	c120	2748	Hides and skins	Hides, skins, wool	tonnes		1
CHN	c122	2747	Silk	Hides, skins, wool	tonnes		1
COL	c001	2807	Rice and products	Cereals	tonnes	2.11607	0.864
COL	c002	2511	Wheat and products	Cereals	tonnes	2.44027	0.864
COL	c003	2513	Barley and products	Cereals	tonnes	2.292	0.864
COL	c004	2514	Maize and products	Cereals	tonnes	2.86717	0.864
COL	c005	2515	Rye and products	Cereals	tonnes	2.56517	0.7913
COL	c006	2516	Oats	Cereals	tonnes	2.22656	0.864
COL	c007	2517	Millet and products	Cereals	tonnes	3.09914	0.89695
COL	c008	2518	Sorghum and products	Cereals	tonnes	1.84752	0.864
COL	c009	2520	Cereals, Other	Cereals	tonnes	2.99478	0.841132
COL	c010	2531	Potatoes and products	Roots and tubers	tonnes	0.62897	0.94672
COL	c011	2532	Cassava and products	Roots and tubers	tonnes	1.14555	0.94672
COL	c013	2534	Roots, Other	Roots and tubers	tonnes	0.840726	0.94672
COL	c014	2535	Yams	Roots and tubers	tonnes	0.885252	0.94672
COL	c012	2533	Sweet potatoes	Roots and tubers	tonnes	0.887849	0.916853
COL	c031	2601	Tomatoes and products	Vegetables, fruit, nuts, pulses, spices	tonnes	0.202646	0.8811
COL	c032	2602	Onions	Vegetables, fruit, nuts, pulses, spices	tonnes	0.388631	0.8811
COL	c033	2605	Vegetables, Other	Vegetables, fruit, nuts, pulses, spices	tonnes	0.275619	0.8811
COL	c049	2640	Pepper	Vegetables, fruit, nuts, pulses, spices	tonnes	3.1556	0.8811
COL	c050	2641	Pimento	Vegetables, fruit, nuts, pulses, spices	tonnes	3.18772	0.830619
COL	c051	2642	Cloves	Vegetables, fruit, nuts, pulses, spices	tonnes	2.77415	0.849884
COL	c052	2645	Spices, Other	Vegetables, fruit, nuts, pulses, spices	tonnes	3.00899	0.8811
COL	c034	2611	Oranges, Mandarines	Vegetables, fruit, nuts, pulses, spices	tonnes	0.344007	0.8811
COL	c035	2612	Lemons, Limes and products	Vegetables, fruit, nuts, pulses, spices	tonnes	0.30069	0.8811
COL	c036	2613	Grapefruit and products	Vegetables, fruit, nuts, pulses, spices	tonnes	0.220143	0.836248
COL	c037	2614	Citrus, Other	Vegetables, fruit, nuts, pulses, spices	tonnes	0.610502	0.8811
COL	c038	2615	Bananas	Vegetables, fruit, nuts, pulses, spices	tonnes	0.654849	0.8811
COL	c039	2616	Plantains	Vegetables, fruit, nuts, pulses, spices	tonnes	0.738791	0.8811
COL	c040	2617	Apples and products	Vegetables, fruit, nuts, pulses, spices	tonnes	0.522412	0.8811
COL	c041	2618	Pineapples and products	Vegetables, fruit, nuts, pulses, spices	tonnes	0.293005	0.8811
COL	c042	2619	Dates	Vegetables, fruit, nuts, pulses, spices	tonnes	2.04164	0.816697
COL	c043	2620	Grapes and products (excl wine)	Vegetables, fruit, nuts, pulses, spices	tonnes	0.702687	0.8811
COL	c044	2625	Fruits, Other	Vegetables, fruit, nuts, pulses, spices	tonnes	0.606643	0.8811
COL	c109	2848	Milk - Excluding Butter	Milk	tonnes	0.705711	0.8832
COL	c110	2740	Butter, Ghee	Milk	tonnes	7.28091	0.8832
COL	c113	2731	Bovine Meat	Meat	tonnes	2.0352	0.893
COL	c114	2732	Mutton & Goat Meat	Meat	tonnes	1.84752	0.893
COL	c115	2733	Pigmeat	Meat	tonnes	2.20983	0.893
COL	c017	2546	Beans	Vegetables, fruit, nuts, pulses, spices	tonnes	4.07477	0.9604
COL	c018	2547	Peas	Vegetables, fruit, nuts, pulses, spices	tonnes	3.21213	0.9604
COL	c019	2549	Pulses, Other and products	Vegetables, fruit, nuts, pulses, spices	tonnes	3.25018	0.9604
COL	c020	2551	Nuts and products	Vegetables, fruit, nuts, pulses, spices	tonnes	3.17317	0.9604
COL	c021	2555	Soyabeans	Oil crops	tonnes	3.94138	0.9604
COL	c022	2552	Groundnuts	Oil crops	tonnes	4.07148	0.9604
COL	c023	2557	Sunflower seed	Oil crops	tonnes	4.64089	0.959822
COL	c026	2560	Coconuts - Incl Copra	Oil crops	tonnes	0.865499	0.9604
COL	c027	2561	Sesame seed	Oil crops	tonnes	8.13723	0.958641
COL	c030	2570	Oilcrops, Other	Oil crops	tonnes	4.66542	0.953733
COL	c111	2744	Eggs	Eggs	tonnes	1.26309	0.9216
COL	c116	2734	Poultry Meat	Meat	tonnes	1.37177	0.893
COL	c123	2960	Fish, Seafood	Fish	tonnes	0.763491	0.8908
COL	c074	2577	Palm Oil	Vegetable oils	tonnes	8.55177	0.9604
COL	c068	2571	Soyabean Oil	Vegetable oils	tonnes	8.44995	0.9604
COL	c069	2572	Groundnut Oil	Vegetable oils	tonnes	6.69306	0.961588
COL	c070	2573	Sunflowerseed Oil	Vegetable oils	tonnes	5.44329	0.9604
COL	c071	2574	Rape and Mustard Oil	Vegetable oils	tonnes	9.09694	0.9604
COL	c072	2575	Cottonseed Oil	Vegetable oils	tonnes	7.33575	0.9604
COL	c073	2576	Palmkernel Oil	Vegetable oils	tonnes	8.86451	0.9604
COL	c075	2578	Coconut Oil	Vegetable oils	tonnes	8.0694	0.959969
COL	c076	2579	Sesameseed Oil	Vegetable oils	tonnes	8.91304	0.961456
COL	c077	2580	Olive Oil	Vegetable oils	tonnes	8.49981	0.9604
COL	c078	2581	Ricebran Oil	Vegetable oils	tonnes	9.53884	0.960333
COL	c079	2582	Maize Germ Oil	Vegetable oils	tonnes	8.0303	0.9604
COL	c080	2586	Oilcrops Oil, Other	Vegetable oils	tonnes	7.84032	0.9604
COL	c119	2737	Fats, Animals, Raw	Animal fats	tonnes	6.90645	0.893
COL	c015	2536	Sugar cane	Sugar crops	tonnes	0.246434	1
COL	c016	2537	Sugar beet	Sugar crops	tonnes	0.560855	1
COL	c065	2541	Sugar non-centrifugal	Sugar, sweeteners	tonnes	3.79734	0.94335
COL	c066	2542	Sugar (Raw Equivalent)	Sugar, sweeteners	tonnes	3.63043	0.94335
COL	c067	2543	Sweeteners, Other	Sugar, sweeteners	tonnes	1.45762	0.94335
COL	c121	2745	Honey	Honey	tonnes	3.00448	0.94335
COL	c045	2630	Coffee and products	Coffee, tea, cocoa	tonnes	0.875894	1
COL	c046	2633	Cocoa Beans and products	Coffee, tea, cocoa	tonnes	2.79785	1
COL	c047	2635	Tea (including mate)	Coffee, tea, cocoa	tonnes	0.184568	1
COL	c090	2655	Wine	Alcohol	tonnes	0.800593	1
COL	c091	2656	Beer	Alcohol	tonnes	0.437168	1
COL	c092	2657	Beverages, Fermented	Alcohol	tonnes	0.370059	1
COL	c093	2658	Beverages, Alcoholic	Alcohol	tonnes	2.79933	1
COL	c117	2735	Meat, Other	Meat	tonnes	1.22398	0.893
COL	c118	2736	Offals, Edible	Meat	tonnes	1.25281	0.893
COL	c024	2558	Rape and Mustardseed	Oil crops	tonnes	1.66443	0.951511
COL	c025	328	Seed cotton	Oil crops	tonnes		1
COL	c028	254	Oil, palm fruit	Oil crops	tonnes		1
COL	c029	2563	Olives (including preserved)	Oil crops	tonnes	1.66443	0.9604
COL	c048	677	Hops	Vegetables, fruit, nuts, pulses, spices	tonnes		1
COL	c053	2662	Jute	Fibre crops	tonnes		1
COL	c054	2663	Jute-Like Fibres	Fibre crops	tonnes		1
COL	c055	2664	Soft-Fibres, Other	Fibre crops	tonnes		1
COL	c056	2665	Sisal	Fibre crops	tonnes		1
COL	c057	2666	Abaca	Fibre crops	tonnes		1
COL	c058	2667	Hard Fibres, Other	Fibre crops	tonnes		1
COL	c059	2671	Tobacco	Tobacco, rubber	tonnes		1
COL	c060	2672	Rubber	Tobacco, rubber	tonnes		1
COL	c061	2000	Fodder crops	Fodder crops	tonnes		1
COL	c062	2001	Grazing	Grazing	tonnes		1
COL	c063	2559	Cottonseed	Fibre crops	tonnes	4.90679	1
COL	c064	2562	Palm kernels	Oil crops	tonnes		1
COL	c081	2590	Soyabean Cake	Oil cakes	tonnes		1
COL	c082	2591	Groundnut Cake	Oil cakes	tonnes		1
COL	c083	2592	Sunflowerseed Cake	Oil cakes	tonnes		1
COL	c084	2593	Rape and Mustard Cake	Oil cakes	tonnes		1
COL	c085	2594	Cottonseed Cake	Oil cakes	tonnes		1
COL	c086	2595	Palmkernel Cake	Oil cakes	tonnes		1
COL	c087	2596	Copra Cake	Oil cakes	tonnes		1
COL	c088	2597	Sesameseed Cake	Oil cakes	tonnes		1
COL	c089	2598	Oilseed Cakes, Other	Oil cakes	tonnes		1
COL	c094	2659	Alcohol, Non-Food	Ethanol	tonnes		1
COL	c095	2661	Cotton lint	Fibre crops	tonnes		1
COL	c096	866	Cattle	Live animals	1000 Head		1
COL	c097	946	Buffaloes	Live animals	1000 Head		1
COL	c098	976	Sheep	Live animals	1000 Head		1
COL	c099	1016	Goats	Live animals	1000 Head		1
COL	c100	1034	Pigs	Live animals	1000 Head		1
COL	c101	2029	Poultry Birds	Live animals	1000 Head		1
COL	c102	1096	Horses	Live animals	1000 Head		1
COL	c103	1107	Asses	Live animals	1000 Head		1
COL	c104	1110	Mules	Live animals	1000 Head		1
COL	c105	1126	Camels	Live animals	1000 Head		1
COL	c106	1157	Camelids, other	Live animals	1000 Head		1
COL	c107	1140	Rabbits and hares	Live animals	1000 Head		1
COL	c108	1150	Rodents, other	Live animals	1000 Head		1
COL	c112	2746	Wool (Clean Eq.)	Hides, skins, wool	tonnes		1
COL	c120	2748	Hides and skins	Hides, skins, wool	tonnes		1
COL	c122	2747	Silk	Hides, skins, wool	tonnes		1
CRI	c001	2807	Rice and products	Cereals	tonnes	2.18043	0.864
CRI	c002	2511	Wheat and products	Cereals	tonnes	2.64611	0.864
CRI	c003	2513	Barley and products	Cereals	tonnes	3.64853	0.864
CRI	c004	2514	Maize and products	Cereals	tonnes	3.32896	0.864
CRI	c005	2515	Rye and products	Cereals	tonnes	2.56517	0.7913
CRI	c006	2516	Oats	Cereals	tonnes	1.92826	0.864
CRI	c007	2517	Millet and products	Cereals	tonnes	3.09914	0.89695
CRI	c008	2518	Sorghum and products	Cereals	tonnes	3.33564	0.876178
CRI	c009	2520	Cereals, Other	Cereals	tonnes	2.19011	0.864
CRI	c010	2531	Potatoes and products	Roots and tubers	tonnes	0.581343	0.94672
CRI	c011	2532	Cassava and products	Roots and tubers	tonnes	1.05285	0.94672
CRI	c013	2534	Roots, Other	Roots and tubers	tonnes	0.875824	0.94672
CRI	c014	2535	Yams	Roots and tubers	tonnes	0.843879	0.94672
CRI	c012	2533	Sweet potatoes	Roots and tubers	tonnes	0.887849	0.94672
CRI	c031	2601	Tomatoes and products	Vegetables, fruit, nuts, pulses, spices	tonnes	0.0936131	0.8811
CRI	c032	2602	Onions	Vegetables, fruit, nuts, pulses, spices	tonnes	0.394714	0.8811
CRI	c033	2605	Vegetables, Other	Vegetables, fruit, nuts, pulses, spices	tonnes	0.291827	0.8811
CRI	c049	2640	Pepper	Vegetables, fruit, nuts, pulses, spices	tonnes	3.85735	0.8811
CRI	c050	2641	Pimento	Vegetables, fruit, nuts, pulses, spices	tonnes	3.18772	0.830619
CRI	c051	2642	Cloves	Vegetables, fruit, nuts, pulses, spices	tonnes	2.77415	0.849884
CRI	c052	2645	Spices, Other	Vegetables, fruit, nuts, pulses, spices	tonnes	2.70201	0.8811
CRI	c034	2611	Oranges, Mandarines	Vegetables, fruit, nuts, pulses, spices	tonnes	0.341748	0.8811
CRI	c035	2612	Lemons, Limes and products	Vegetables, fruit, nuts, pulses, spices	tonnes	0.303112	0.8811
CRI	c036	2613	Grapefruit and products	Vegetables, fruit, nuts, pulses, spices	tonnes	0.194341	0.8811
CRI	c037	2614	Citrus, Other	Vegetables, fruit, nuts, pulses, spices	tonnes	0.55407	0.8811
CRI	c038	2615	Bananas	Vegetables, fruit, nuts, pulses, spices	tonnes	5.59037	0.8811
CRI	c039	2616	Plantains	Vegetables, fruit, nuts, pulses, spices	tonnes	0.744793	0.8811
CRI	c040	2617	Apples and products	Vegetables, fruit, nuts, pulses, spices	tonnes	0.198654	0.8811
CRI	c041	2618	Pineapples and products	Vegetables, fruit, nuts, pulses, spices	tonnes	0.290843	0.8811
CRI	c042	2619	Dates	Vegetables, fruit, nuts, pulses, spices	tonnes	2.04164	0.816697
CRI	c043	2620	Grapes and products (excl wine)	Vegetables, fruit, nuts, pulses, spices	tonnes	0.670956	0.8811
CRI	c044	2625	Fruits, Other	Vegetables, fruit, nuts, pulses, spices	tonnes	0.472487	0.8811
CRI	c109	2848	Milk - Excluding Butter	Milk	tonnes	0.774503	0.8832
CRI	c110	2740	Butter, Ghee	Milk	tonnes	7.25622	0.8832
CRI	c113	2731	Bovine Meat	Meat	tonnes	1.51314	0.893
CRI	c114	2732	Mutton & Goat Meat	Meat	tonnes	2.0699	0.893
CRI	c115	2733	Pigmeat	Meat	tonnes	1.53573	0.893
CRI	c017	2546	Beans	Vegetables, fruit, nuts, pulses, spices	tonnes	3.14109	0.9604
CRI	c018	2547	Peas	Vegetables, fruit, nuts, pulses, spices	tonnes	3.1937	0.9604
CRI	c019	2549	Pulses, Other and products	Vegetables, fruit, nuts, pulses, spices	tonnes	2.91612	0.9604
CRI	c020	2551	Nuts and products	Vegetables, fruit, nuts, pulses, spices	tonnes	2.08178	0.9604
CRI	c021	2555	Soyabeans	Oil crops	tonnes	3.70828	0.9604
CRI	c022	2552	Groundnuts	Oil crops	tonnes	3.0448	0.9604
CRI	c023	2557	Sunflower seed	Oil crops	tonnes	2.598	0.9604
CRI	c026	2560	Coconuts - Incl Copra	Oil crops	tonnes	0.883632	0.9604
CRI	c027	2561	Sesame seed	Oil crops	tonnes	5.50659	0.958641
CRI	c030	2570	Oilcrops, Other	Oil crops	tonnes	4.66542	0.953733
CRI	c111	2744	Eggs	Eggs	tonnes	1.23043	0.9216
CRI	c116	2734	Poultry Meat	Meat	tonnes	1.36972	0.893
CRI	c123	2960	Fish, Seafood	Fish	tonnes	0.844494	0.8908
CRI	c074	2577	Palm Oil	Vegetable oils	tonnes	7.62913	0.9604
CRI	c068	2571	Soyabean Oil	Vegetable oils	tonnes	8.98227	0.9604
CRI	c069	2572	Groundnut Oil	Vegetable oils	tonnes	6.69306	0.961588
CRI	c070	2573	Sunflowerseed Oil	Vegetable oils	tonnes	9.30446	0.9604
CRI	c071	2574	Rape and Mustard Oil	Vegetable oils	tonnes	5.25443	0.958914
CRI	c072	2575	Cottonseed Oil	Vegetable oils	tonnes	7.33575	0.9604
CRI	c073	2576	Palmkernel Oil	Vegetable oils	tonnes	4.59511	0.96095
CRI	c075	2578	Coconut Oil	Vegetable oils	tonnes	8.0694	0.9604
CRI	c076	2579	Sesameseed Oil	Vegetable oils	tonnes	8.91304	0.9604
CRI	c077	2580	Olive Oil	Vegetable oils	tonnes	8.95354	0.9604
CRI	c078	2581	Ricebran Oil	Vegetable oils	tonnes	9.53884	0.960333
CRI	c079	2582	Maize Germ Oil	Vegetable oils	tonnes	7.07215	0.9604
CRI	c080	2586	Oilcrops Oil, Other	Vegetable oils	tonnes	8.27996	0.9604
CRI	c119	2737	Fats, Animals, Raw	Animal fats	tonnes	19.061	0.893
CRI	c015	2536	Sugar cane	Sugar crops	tonnes	0.246434	1
CRI	c016	2537	Sugar beet	Sugar crops	tonnes	0.560855	1
CRI	c065	2541	Sugar non-centrifugal	Sugar, sweeteners	tonnes	3.59854	0.94335
CRI	c066	2542	Sugar (Raw Equivalent)	Sugar, sweeteners	tonnes	3.51074	0.94335
CRI	c067	2543	Sweeteners, Other	Sugar, sweeteners	tonnes	0.273668	0.94335
CRI	c121	2745	Honey	Honey	tonnes	4.06233	0.94335
CRI	c045	2630	Coffee and products	Coffee, tea, cocoa	tonnes	0.377006	1
CRI	c046	2633	Cocoa Beans and products	Coffee, tea, cocoa	tonnes	5.62764	1
CRI	c047	2635	Tea (including mate)	Coffee, tea, cocoa	tonnes	0.0944199	1
CRI	c090	2655	Wine	Alcohol	tonnes	0.665442	1
CRI	c091	2656	Beer	Alcohol	tonnes	0.438821	1
CRI	c092	2657	Beverages, Fermented	Alcohol	tonnes	0.495223	1
CRI	c093	2658	Beverages, Alcoholic	Alcohol	tonnes	2.81812	1
CRI	c117	2735	Meat, Other	Meat	tonnes	1.39729	0.881854
CRI	c118	2736	Offals, Edible	Meat	tonnes	1.38371	0.893
CRI	c024	2558	Rape and Mustardseed	Oil crops	tonnes	0.976174	0.951511
CRI	c025	328	Seed cotton	Oil crops	tonnes		1
CRI	c028	254	Oil, palm fruit	Oil crops	tonnes		1
CRI	c029	2563	Olives (including preserved)	Oil crops	tonnes	0.764782	0.9604
CRI	c048	677	Hops	Vegetables, fruit, nuts, pulses, spices	tonnes		1
CRI	c053	2662	Jute	Fibre crops	tonnes		1
CRI	c054	2663	Jute-Like Fibres	Fibre crops	tonnes		1
CRI	c055	2664	Soft-Fibres, Other	Fibre crops	tonnes		1
CRI	c056	2665	Sisal	Fibre crops	tonnes		1
CRI	c057	2666	Abaca	Fibre crops	tonnes		1
CRI	c058	2667	Hard Fibres, Other	Fibre crops	tonnes		1
CRI	c059	2671	Tobacco	Tobacco, rubber	tonnes		1
CRI	c060	2672	Rubber	Tobacco, rubber	tonnes		1
CRI	c061	2000	Fodder crops	Fodder crops	tonnes		1
CRI	c062	2001	Grazing	Grazing	tonnes		1
CRI	c063	2559	Cottonseed	Fibre crops	tonnes	4.90679	1
CRI	c064	2562	Palm kernels	Oil crops	tonnes		1
CRI	c081	2590	Soyabean Cake	Oil cakes	tonnes		1
CRI	c082	2591	Groundnut Cake	Oil cakes	tonnes		1
CRI	c083	2592	Sunflowerseed Cake	Oil cakes	tonnes		1
CRI	c084	2593	Rape and Mustard Cake	Oil cakes	tonnes		1
CRI	c085	2594	Cottonseed Cake	Oil cakes	tonnes		1
CRI	c086	2595	Palmkernel Cake	Oil cakes	tonnes		1
CRI	c087	2596	Copra Cake	Oil cakes	tonnes		1
CRI	c088	2597	Sesameseed Cake	Oil cakes	tonnes		1
CRI	c089	2598	Oilseed Cakes, Other	Oil cakes	tonnes		1
CRI	c094	2659	Alcohol, Non-Food	Ethanol	tonnes		1
CRI	c095	2661	Cotton lint	Fibre crops	tonnes		1
CRI	c096	866	Cattle	Live animals	1000 Head		1
CRI	c097	946	Buffaloes	Live animals	1000 Head		1
CRI	c098	976	Sheep	Live animals	1000 Head		1
CRI	c099	1016	Goats	Live animals	1000 Head		1
CRI	c100	1034	Pigs	Live animals	1000 Head		1
CRI	c101	2029	Poultry Birds	Live animals	1000 Head		1
CRI	c102	1096	Horses	Live animals	1000 Head		1
CRI	c103	1107	Asses	Live animals	1000 Head		1
CRI	c104	1110	Mules	Live animals	1000 Head		1
CRI	c105	1126	Camels	Live animals	1000 Head		1
CRI	c106	1157	Camelids, other	Live animals	1000 Head		1
CRI	c107	1140	Rabbits and hares	Live animals	1000 Head		1
CRI	c108	1150	Rodents, other	Live animals	1000 Head		1
CRI	c112	2746	Wool (Clean Eq.)	Hides, skins, wool	tonnes		1
CRI	c120	2748	Hides and skins	Hides, skins, wool	tonnes		1
CRI	c122	2747	Silk	Hides, skins, wool	tonnes		1
CUB	c001	2807	Rice and products	Cereals	tonnes	1.39343	0.864
CUB	c002	2511	Wheat and products	Cereals	tonnes	2.47114	0.864
CUB	c003	2513	Barley and products	Cereals	tonnes	2.01239	0.831393
CUB	c004	2514	Maize and products	Cereals	tonnes	3.35639	0.864
CUB	c005	2515	Rye and products	Cereals	tonnes	2.56517	0.7913
CUB	c006	2516	Oats	Cereals	tonnes	1.98575	0.864
CUB	c007	2517	Millet and products	Cereals	tonnes	3.09914	0.89695
CUB	c008	2518	Sorghum and products	Cereals	tonnes	3.33564	0.876178
CUB	c009	2520	Cereals, Other	Cereals	tonnes	2.19011	0.864
CUB	c010	2531	Potatoes and products	Roots and tubers	tonnes	0.642972	0.94672
CUB	c011	2532	Cassava and products	Roots and tubers	tonnes	1.22176	0.94672
CUB	c013	2534	Roots, Other	Roots and tubers	tonnes	0.918451	0.94672
CUB	c014	2535	Yams	Roots and tubers	tonnes	0.879888	0.94672
CUB	c012	2533	Sweet potatoes	Roots and tubers	tonnes	0.980164	0.94672
CUB	c031	2601	Tomatoes and products	Vegetables, fruit, nuts, pulses, spices	tonnes	0.204147	0.8811
CUB	c032	2602	Onions	Vegetables, fruit, nuts, pulses, spices	tonnes	0.391354	0.8811
CUB	c033	2605	Vegetables, Other	Vegetables, fruit, nuts, pulses, spices	tonnes	0.25235	0.8811
CUB	c049	2640	Pepper	Vegetables, fruit, nuts, pulses, spices	tonnes	3.1556	0.835814
CUB	c050	2641	Pimento	Vegetables, fruit, nuts, pulses, spices	tonnes	3.18772	0.8811
CUB	c051	2642	Cloves	Vegetables, fruit, nuts, pulses, spices	tonnes	2.77415	0.849884
CUB	c052	2645	Spices, Other	Vegetables, fruit, nuts, pulses, spices	tonnes	3.14347	0.8811
CUB	c034	2611	Oranges, Mandarines	Vegetables, fruit, nuts, pulses, spices	tonnes	0.350896	0.8811
CUB	c035	2612	Lemons, Limes and products	Vegetables, fruit, nuts, pulses, spices	tonnes	0.33023	0.8811
CUB	c036	2613	Grapefruit and products	Vegetables, fruit, nuts, pulses, spices	tonnes	0.275191	0.8811
CUB	c037	2614	Citrus, Other	Vegetables, fruit, nuts, pulses, spices	tonnes	0.722377	0.8811
CUB	c038	2615	Bananas	Vegetables, fruit, nuts, pulses, spices	tonnes	0.659349	0.8811
CUB	c039	2616	Plantains	Vegetables, fruit, nuts, pulses, spices	tonnes	0.743947	0.8811
CUB	c040	2617	Apples and products	Vegetables, fruit, nuts, pulses, spices	tonnes	0.213416	0.8811
CUB	c041	2618	Pineapples and products	Vegetables, fruit, nuts, pulses, spices	tonnes	0.284396	0.8811
CUB	c042	2619	Dates	Vegetables, fruit, nuts, pulses, spices	tonnes	2.04164	0.816697
CUB	c043	2620	Grapes and products (excl wine)	Vegetables, fruit, nuts, pulses, spices	tonnes	0.61139	0.8811
CUB	c044	2625	Fruits, Other	Vegetables, fruit, nuts, pulses, spices	tonnes	0.338325	0.8811
CUB	c109	2848	Milk - Excluding Butter	Milk	tonnes	0.614675	0.8832
CUB	c110	2740	Butter, Ghee	Milk	tonnes	8.86022	0.8832
CUB	c113	2731	Bovine Meat	Meat	tonnes	1.99966	0.893
CUB	c114	2732	Mutton & Goat Meat	Meat	tonnes	1.88277	0.893
CUB	c115	2733	Pigmeat	Meat	tonnes	2.38454	0.893
CUB	c017	2546	Beans	Vegetables, fruit, nuts, pulses, spices	tonnes	3.16237	0.9604
CUB	c018	2547	Peas	Vegetables, fruit, nuts, pulses, spices	tonnes	3.1937	0.960086
CUB	c019	2549	Pulses, Other and products	Vegetables, fruit, nuts, pulses, spices	tonnes	3.38047	0.9604
CUB	c020	2551	Nuts and products	Vegetables, fruit, nuts, pulses, spices	tonnes	2.11137	0.9604
CUB	c021	2555	Soyabeans	Oil crops	tonnes	3.93589	0.9604
CUB	c022	2552	Groundnuts	Oil crops	tonnes	4.48562	0.9604
CUB	c023	2557	Sunflower seed	Oil crops	tonnes	4.64089	0.959822
CUB	c026	2560	Coconuts - Incl Copra	Oil crops	tonnes	0.861349	0.9604
CUB	c027	2561	Sesame seed	Oil crops	tonnes	5.50659	0.958641
CUB	c030	2570	Oilcrops, Other	Oil crops	tonnes	4.66542	0.953733
CUB	c111	2744	Eggs	Eggs	tonnes	1.26942	0.9216
CUB	c116	2734	Poultry Meat	Meat	tonnes	1.3803	0.893
CUB	c123	2960	Fish, Seafood	Fish	tonnes	0.691174	0.8908
CUB	c074	2577	Palm Oil	Vegetable oils	tonnes	10.1855	0.9604
CUB	c068	2571	Soyabean Oil	Vegetable oils	tonnes	9.0375	0.9604
CUB	c069	2572	Groundnut Oil	Vegetable oils	tonnes	5.49007	0.9604
CUB	c070	2573	Sunflowerseed Oil	Vegetable oils	tonnes	7.66487	0.9604
CUB	c071	2574	Rape and Mustard Oil	Vegetable oils	tonnes	5.25443	0.958914
CUB	c072	2575	Cottonseed Oil	Vegetable oils	tonnes	7.33575	0.962453
CUB	c073	2576	Palmkernel Oil	Vegetable oils	tonnes	4.59511	0.96095
CUB	c075	2578	Coconut Oil	Vegetable oils	tonnes	8.0694	0.9604
CUB	c076	2579	Sesameseed Oil	Vegetable oils	tonnes	8.91304	0.961456
CUB	c077	2580	Olive Oil	Vegetable oils	tonnes	8.65455	0.9604
CUB	c078	2581	Ricebran Oil	Vegetable oils	tonnes	9.53884	0.960333
CUB	c079	2582	Maize Germ Oil	Vegetable oils	tonnes	8.0303	0.959016
CUB	c080	2586	Oilcrops Oil, Other	Vegetable oils	tonnes	5.78401	0.9604
CUB	c119	2737	Fats, Animals, Raw	Animal fats	tonnes	7.3444	0.893
CUB	c015	2536	Sugar cane	Sugar crops	tonnes	0.246434	1
CUB	c016	2537	Sugar beet	Sugar crops	tonnes	0.560855	1
CUB	c065	2541	Sugar non-centrifugal	Sugar, sweeteners	tonnes	3.78389	0.94335
CUB	c066	2542	Sugar (Raw Equivalent)	Sugar, sweeteners	tonnes	3.67113	0.94335
CUB	c067	2543	Sweeteners, Other	Sugar, sweeteners	tonnes	0.0292278	0.94335
CUB	c121	2745	Honey	Honey	tonnes	3.19979	0.94335
CUB	c045	2630	Coffee and products	Coffee, tea, cocoa	tonnes	0.28488	1
CUB	c046	2633	Cocoa Beans and products	Coffee, tea, cocoa	tonnes	2.45854	1
CUB	c047	2635	Tea (including mate)	Coffee, tea, cocoa	tonnes	0.0944199	1
CUB	c090	2655	Wine	Alcohol	tonnes	0.838526	1
CUB	c091	2656	Beer	Alcohol	tonnes	0.440478	1
CUB	c092	2657	Beverages, Fermented	Alcohol	tonnes	0.495223	1
CUB	c093	2658	Beverages, Alcoholic	Alcohol	tonnes	2.83227	1
CUB	c117	2735	Meat, Other	Meat	tonnes	2.03811	0.893
CUB	c118	2736	Offals, Edible	Meat	tonnes	1.29902	0.893
CUB	c024	2558	Rape and Mustardseed	Oil crops	tonnes	0.621044	0.951511
CUB	c025	328	Seed cotton	Oil crops	tonnes		1
CUB	c028	254	Oil, palm fruit	Oil crops	tonnes		1
CUB	c029	2563	Olives (including preserved)	Oil crops	tonnes	0.412925	0.9604
CUB	c048	677	Hops	Vegetables, fruit, nuts, pulses, spices	tonnes		1
CUB	c053	2662	Jute	Fibre crops	tonnes		1
CUB	c054	2663	Jute-Like Fibres	Fibre crops	tonnes		1
CUB	c055	2664	Soft-Fibres, Other	Fibre crops	tonnes		1
CUB	c056	2665	Sisal	Fibre crops	tonnes		1
CUB	c057	2666	Abaca	Fibre crops	tonnes		1
CUB	c058	2667	Hard Fibres, Other	Fibre crops	tonnes		1
CUB	c059	2671	Tobacco	Tobacco, rubber	tonnes		1
CUB	c060	2672	Rubber	Tobacco, rubber	tonnes		1
CUB	c061	2000	Fodder crops	Fodder crops	tonnes		1
CUB	c062	2001	Grazing	Grazing	tonnes		1
CUB	c063	2559	Cottonseed	Fibre crops	tonnes	4.90679	1
CUB	c064	2562	Palm kernels	Oil crops	tonnes		1
CUB	c081	2590	Soyabean Cake	Oil cakes	tonnes		1
CUB	c082	2591	Groundnut Cake	Oil cakes	tonnes		1
CUB	c083	2592	Sunflowerseed Cake	Oil cakes	tonnes		1
CUB	c084	2593	Rape and Mustard Cake	Oil cakes	tonnes		1
CUB	c085	2594	Cottonseed Cake	Oil cakes	tonnes		1
CUB	c086	2595	Palmkernel Cake	Oil cakes	tonnes		1
CUB	c087	2596	Copra Cake	Oil cakes	tonnes		1
CUB	c088	2597	Sesameseed Cake	Oil cakes	tonnes		1
CUB	c089	2598	Oilseed Cakes, Other	Oil cakes	tonnes		1
CUB	c094	2659	Alcohol, Non-Food	Ethanol	tonnes		1
CUB	c095	2661	Cotton lint	Fibre crops	tonnes		1
CUB	c096	866	Cattle	Live animals	1000 Head		1
CUB	c097	946	Buffaloes	Live animals	1000 Head		1
CUB	c098	976	Sheep	Live animals	1000 Head		1
CUB	c099	1016	Goats	Live animals	1000 Head		1
CUB	c100	1034	Pigs	Live animals	1000 Head		1
CUB	c101	2029	Poultry Birds	Live animals	1000 Head		1
CUB	c102	1096	Horses	Live animals	1000 Head		1
CUB	c103	1107	Asses	Live animals	1000 Head		1
CUB	c104	1110	Mules	Live animals	1000 Head		1
CUB	c105	1126	Camels	Live animals	1000 Head		1
CUB	c106	1157	Camelids, other	Live animals	1000 Head		1
CUB	c107	1140	Rabbits and hares	Live animals	1000 Head		1
CUB	c108	1150	Rodents, other	Live animals	1000 Head		1
CUB	c112	2746	Wool (Clean Eq.)	Hides, skins, wool	tonnes		1
CUB	c120	2748	Hides and skins	Hides, skins, wool	tonnes		1
CUB	c122	2747	Silk	Hides, skins, wool	tonnes		1
AZE	c001	2807	Rice and products	Cereals	tonnes	2.47431	0.735
AZE	c002	2511	Wheat and products	Cereals	tonnes	2.51981	0.735
AZE	c003	2513	Barley and products	Cereals	tonnes	0.739589	0.735
AZE	c004	2514	Maize and products	Cereals	tonnes	2.64642	0.735
AZE	c005	2515	Rye and products	Cereals	tonnes	2.92341	0.735
AZE	c006	2516	Oats	Cereals	tonnes	2.46093	0.735
AZE	c007	2517	Millet and products	Cereals	tonnes	3.09914	0.89695
AZE	c008	2518	Sorghum and products	Cereals	tonnes	3.33564	0.876178
AZE	c009	2520	Cereals, Other	Cereals	tonnes	3.58181	0.735
AZE	c010	2531	Potatoes and products	Roots and tubers	tonnes	0.641781	0.831541
AZE	c011	2532	Cassava and products	Roots and tubers	tonnes	1.09645	0.922469
AZE	c013	2534	Roots, Other	Roots and tubers	tonnes	0.863013	0.922897
AZE	c014	2535	Yams	Roots and tubers	tonnes	0.873362	0.930556
AZE	c012	2533	Sweet potatoes	Roots and tubers	tonnes	0.887849	0.916853
AZE	c031	2601	Tomatoes and products	Vegetables, fruit, nuts, pulses, spices	tonnes	0.201477	0.7914
AZE	c032	2602	Onions	Vegetables, fruit, nuts, pulses, spices	tonnes	0.388376	0.7914
AZE	c033	2605	Vegetables, Other	Vegetables, fruit, nuts, pulses, spices	tonnes	0.229502	0.7914
AZE	c049	2640	Pepper	Vegetables, fruit, nuts, pulses, spices	tonnes	3.1556	0.7914
AZE	c050	2641	Pimento	Vegetables, fruit, nuts, pulses, spices	tonnes	3.18772	0.7914
AZE	c051	2642	Cloves	Vegetables, fruit, nuts, pulses, spices	tonnes	2.77415	0.849884
AZE	c052	2645	Spices, Other	Vegetables, fruit, nuts, pulses, spices	tonnes	3.3474	0.7914
AZE	c034	2611	Oranges, Mandarines	Vegetables, fruit, nuts, pulses, spices	tonnes	0.341666	0.7914
AZE	c035	2612	Lemons, Limes and products	Vegetables, fruit, nuts, pulses, spices	tonnes	0.316393	0.7914
AZE	c036	2613	Grapefruit and products	Vegetables, fruit, nuts, pulses, spices	tonnes	0.337485	0.7914
AZE	c037	2614	Citrus, Other	Vegetables, fruit, nuts, pulses, spices	tonnes	0.553101	0.7914
AZE	c038	2615	Bananas	Vegetables, fruit, nuts, pulses, spices	tonnes	0.662496	0.7914
AZE	c039	2616	Plantains	Vegetables, fruit, nuts, pulses, spices	tonnes	0.743545	0.859938
AZE	c040	2617	Apples and products	Vegetables, fruit, nuts, pulses, spices	tonnes	0.417484	0.7914
AZE	c041	2618	Pineapples and products	Vegetables, fruit, nuts, pulses, spices	tonnes	0.250073	0.7914
AZE	c042	2619	Dates	Vegetables, fruit, nuts, pulses, spices	tonnes	1.94456	0.7914
AZE	c043	2620	Grapes and products (excl wine)	Vegetables, fruit, nuts, pulses, spices	tonnes	0.651922	0.7914
AZE	c044	2625	Fruits, Other	Vegetables, fruit, nuts, pulses, spices	tonnes	0.469089	0.7914
AZE	c109	2848	Milk - Excluding Butter	Milk	tonnes	0.670209	0.92535
AZE	c110	2740	Butter, Ghee	Milk	tonnes	7.5045	0.92535
AZE	c113	2731	Bovine Meat	Meat	tonnes	1.99904	0.8544
AZE	c114	2732	Mutton & Goat Meat	Meat	tonnes	2.22535	0.8544
AZE	c115	2733	Pigmeat	Meat	tonnes	2.88305	0.8544
AZE	c017	2546	Beans	Vegetables, fruit, nuts, pulses, spices	tonnes	3.53511	0.9504
AZE	c018	2547	Peas	Vegetables, fruit, nuts, pulses, spices	tonnes	3.1937	0.960086
AZE	c019	2549	Pulses, Other and products	Vegetables, fruit, nuts, pulses, spices	tonnes	3.25314	0.959643
AZE	c020	2551	Nuts and products	Vegetables, fruit, nuts, pulses, spices	tonnes	2.70524	0.9504
AZE	c021	2555	Soyabeans	Oil crops	tonnes	3.64044	0.958888
AZE	c022	2552	Groundnuts	Oil crops	tonnes	2.52177	0.9504
AZE	c023	2557	Sunflower seed	Oil crops	tonnes	4.64089	0.959822
AZE	c026	2560	Coconuts - Incl Copra	Oil crops	tonnes	1.03121	0.9504
AZE	c027	2561	Sesame seed	Oil crops	tonnes	5.50659	0.958641
AZE	c030	2570	Oilcrops, Other	Oil crops	tonnes	4.66542	0.953733
AZE	c111	2744	Eggs	Eggs	tonnes	1.27076	0.9016
AZE	c116	2734	Poultry Meat	Meat	tonnes	1.37334	0.8544
AZE	c123	2960	Fish, Seafood	Fish	tonnes	0.70383	0.853196
AZE	c074	2577	Palm Oil	Vegetable oils	tonnes	0.0250114	0.962714
AZE	c068	2571	Soyabean Oil	Vegetable oils	tonnes	8.43713	0.9504
AZE	c069	2572	Groundnut Oil	Vegetable oils	tonnes	6.69306	0.961588
AZE	c070	2573	Sunflowerseed Oil	Vegetable oils	tonnes	3.50465	0.9504
AZE	c071	2574	Rape and Mustard Oil	Vegetable oils	tonnes	5.25443	0.958914
AZE	c072	2575	Cottonseed Oil	Vegetable oils	tonnes	7.33575	0.962453
AZE	c073	2576	Palmkernel Oil	Vegetable oils	tonnes	4.59511	0.96095
AZE	c075	2578	Coconut Oil	Vegetable oils	tonnes	8.0694	0.9504
AZE	c076	2579	Sesameseed Oil	Vegetable oils	tonnes	8.91304	0.961456
AZE	c077	2580	Olive Oil	Vegetable oils	tonnes	9.12123	0.9504
AZE	c078	2581	Ricebran Oil	Vegetable oils	tonnes	9.53884	0.960333
AZE	c079	2582	Maize Germ Oil	Vegetable oils	tonnes	3.6551	0.9504
AZE	c080	2586	Oilcrops Oil, Other	Vegetable oils	tonnes	7.9419	0.9504
AZE	c119	2737	Fats, Animals, Raw	Animal fats	tonnes	6.74582	0.8544
AZE	c015	2536	Sugar cane	Sugar crops	tonnes	0.246434	1
AZE	c016	2537	Sugar beet	Sugar crops	tonnes	0.560855	1
AZE	c065	2541	Sugar non-centrifugal	Sugar, sweeteners	tonnes	3.78389	0.94335
AZE	c066	2542	Sugar (Raw Equivalent)	Sugar, sweeteners	tonnes	3.47496	0.94335
AZE	c067	2543	Sweeteners, Other	Sugar, sweeteners	tonnes	0.407016	0.94335
AZE	c121	2745	Honey	Honey	tonnes	3.08112	0.94335
AZE	c045	2630	Coffee and products	Coffee, tea, cocoa	tonnes	0.362424	1
AZE	c046	2633	Cocoa Beans and products	Coffee, tea, cocoa	tonnes	8.92053	1
AZE	c047	2635	Tea (including mate)	Coffee, tea, cocoa	tonnes	0.133913	1
AZE	c090	2655	Wine	Alcohol	tonnes	0.926746	1
AZE	c091	2656	Beer	Alcohol	tonnes	0.439501	1
AZE	c092	2657	Beverages, Fermented	Alcohol	tonnes	0.495223	1
AZE	c093	2658	Beverages, Alcoholic	Alcohol	tonnes	2.83342	1
AZE	c117	2735	Meat, Other	Meat	tonnes	1.39729	0.8544
AZE	c118	2736	Offals, Edible	Meat	tonnes	1.2101	0.8544
AZE	c024	2558	Rape and Mustardseed	Oil crops	tonnes	0.413309	0.951511
AZE	c025	328	Seed cotton	Oil crops	tonnes		1
AZE	c028	254	Oil, palm fruit	Oil crops	tonnes		1
AZE	c029	2563	Olives (including preserved)	Oil crops	tonnes	1.27494	0.9504
AZE	c048	677	Hops	Vegetables, fruit, nuts, pulses, spices	tonnes		1
AZE	c053	2662	Jute	Fibre crops	tonnes		1
AZE	c054	2663	Jute-Like Fibres	Fibre crops	tonnes		1
AZE	c055	2664	Soft-Fibres, Other	Fibre crops	tonnes		1
AZE	c056	2665	Sisal	Fibre crops	tonnes		1
AZE	c057	2666	Abaca	Fibre crops	tonnes		1
AZE	c058	2667	Hard Fibres, Other	Fibre crops	tonnes		1
AZE	c059	2671	Tobacco	Tobacco, rubber	tonnes		1
AZE	c060	2672	Rubber	Tobacco, rubber	tonnes		1
AZE	c061	2000	Fodder crops	Fodder crops	tonnes		1
AZE	c062	2001	Grazing	Grazing	tonnes		1
AZE	c063	2559	Cottonseed	Fibre crops	tonnes	4.90679	1
AZE	c064	2562	Palm kernels	Oil crops	tonnes		1
AZE	c081	2590	Soyabean Cake	Oil cakes	tonnes		1
AZE	c082	2591	Groundnut Cake	Oil cakes	tonnes		1
AZE	c083	2592	Sunflowerseed Cake	Oil cakes	tonnes		1
AZE	c084	2593	Rape and Mustard Cake	Oil cakes	tonnes		1
AZE	c085	2594	Cottonseed Cake	Oil cakes	tonnes		1
AZE	c086	2595	Palmkernel Cake	Oil cakes	tonnes		1
AZE	c087	2596	Copra Cake	Oil cakes	tonnes		1
AZE	c088	2597	Sesameseed Cake	Oil cakes	tonnes		1
AZE	c089	2598	Oilseed Cakes, Other	Oil cakes	tonnes		1
AZE	c094	2659	Alcohol, Non-Food	Ethanol	tonnes		1
AZE	c095	2661	Cotton lint	Fibre crops	tonnes		1
AZE	c096	866	Cattle	Live animals	1000 Head		1
AZE	c097	946	Buffaloes	Live animals	1000 Head		1
AZE	c098	976	Sheep	Live animals	1000 Head		1
AZE	c099	1016	Goats	Live animals	1000 Head		1
AZE	c100	1034	Pigs	Live animals	1000 Head		1
AZE	c101	2029	Poultry Birds	Live animals	1000 Head		1
AZE	c102	1096	Horses	Live animals	1000 Head		1
AZE	c103	1107	Asses	Live animals	1000 Head		1
AZE	c104	1110	Mules	Live animals	1000 Head		1
AZE	c105	1126	Camels	Live animals	1000 Head		1
AZE	c106	1157	Camelids, other	Live animals	1000 Head		1
AZE	c107	1140	Rabbits and hares	Live animals	1000 Head		1
AZE	c108	1150	Rodents, other	Live animals	1000 Head		1
AZE	c112	2746	Wool (Clean Eq.)	Hides, skins, wool	tonnes		1
AZE	c120	2748	Hides and skins	Hides, skins, wool	tonnes		1
AZE	c122	2747	Silk	Hides, skins, wool	tonnes		1
DMA	c001	2807	Rice and products	Cereals	tonnes	2.2446	0.864
DMA	c002	2511	Wheat and products	Cereals	tonnes	8.5414	0.864
DMA	c003	2513	Barley and products	Cereals	tonnes	2.01239	0.864
DMA	c004	2514	Maize and products	Cereals	tonnes	2.97977	0.864
DMA	c005	2515	Rye and products	Cereals	tonnes	2.56517	0.7913
DMA	c006	2516	Oats	Cereals	tonnes	1.98575	0.864
DMA	c007	2517	Millet and products	Cereals	tonnes	3.09914	0.89695
DMA	c008	2518	Sorghum and products	Cereals	tonnes	3.33564	0.876178
DMA	c009	2520	Cereals, Other	Cereals	tonnes	2.19011	0.864
DMA	c010	2531	Potatoes and products	Roots and tubers	tonnes	0.662334	0.94672
DMA	c011	2532	Cassava and products	Roots and tubers	tonnes	0.680778	0.94672
DMA	c013	2534	Roots, Other	Roots and tubers	tonnes	0.943896	0.94672
DMA	c014	2535	Yams	Roots and tubers	tonnes	0.840626	0.94672
DMA	c012	2533	Sweet potatoes	Roots and tubers	tonnes	0.497945	0.94672
DMA	c031	2601	Tomatoes and products	Vegetables, fruit, nuts, pulses, spices	tonnes	0.177767	0.8811
DMA	c032	2602	Onions	Vegetables, fruit, nuts, pulses, spices	tonnes	0.38545	0.8811
DMA	c033	2605	Vegetables, Other	Vegetables, fruit, nuts, pulses, spices	tonnes	0.21684	0.8811
DMA	c049	2640	Pepper	Vegetables, fruit, nuts, pulses, spices	tonnes	3.1556	0.8811
DMA	c050	2641	Pimento	Vegetables, fruit, nuts, pulses, spices	tonnes	3.18772	0.830619
DMA	c051	2642	Cloves	Vegetables, fruit, nuts, pulses, spices	tonnes	2.77415	0.8811
DMA	c052	2645	Spices, Other	Vegetables, fruit, nuts, pulses, spices	tonnes	2.43217	0.8811
DMA	c034	2611	Oranges, Mandarines	Vegetables, fruit, nuts, pulses, spices	tonnes	0.300058	0.8811
DMA	c035	2612	Lemons, Limes and products	Vegetables, fruit, nuts, pulses, spices	tonnes	0.361213	0.8811
DMA	c036	2613	Grapefruit and products	Vegetables, fruit, nuts, pulses, spices	tonnes	0.227529	0.8811
DMA	c037	2614	Citrus, Other	Vegetables, fruit, nuts, pulses, spices	tonnes	0.55407	0.8811
DMA	c038	2615	Bananas	Vegetables, fruit, nuts, pulses, spices	tonnes	0.706383	0.8811
DMA	c039	2616	Plantains	Vegetables, fruit, nuts, pulses, spices	tonnes	0.778089	0.8811
DMA	c040	2617	Apples and products	Vegetables, fruit, nuts, pulses, spices	tonnes	0.12294	0.8811
DMA	c041	2618	Pineapples and products	Vegetables, fruit, nuts, pulses, spices	tonnes	0.22695	0.8811
DMA	c042	2619	Dates	Vegetables, fruit, nuts, pulses, spices	tonnes	2.04164	0.816697
DMA	c043	2620	Grapes and products (excl wine)	Vegetables, fruit, nuts, pulses, spices	tonnes	0.61139	0.8811
DMA	c044	2625	Fruits, Other	Vegetables, fruit, nuts, pulses, spices	tonnes	0.460949	0.8811
DMA	c109	2848	Milk - Excluding Butter	Milk	tonnes	0.937936	0.8832
DMA	c110	2740	Butter, Ghee	Milk	tonnes	7.54735	0.8832
DMA	c113	2731	Bovine Meat	Meat	tonnes	1.27145	0.893
DMA	c114	2732	Mutton & Goat Meat	Meat	tonnes	2.0699	0.893
DMA	c115	2733	Pigmeat	Meat	tonnes	2.2471	0.893
DMA	c017	2546	Beans	Vegetables, fruit, nuts, pulses, spices	tonnes	3.20596	0.9604
DMA	c018	2547	Peas	Vegetables, fruit, nuts, pulses, spices	tonnes	3.1937	0.9604
DMA	c019	2549	Pulses, Other and products	Vegetables, fruit, nuts, pulses, spices	tonnes	3.25314	0.9604
DMA	c020	2551	Nuts and products	Vegetables, fruit, nuts, pulses, spices	tonnes	2.11137	0.9604
DMA	c021	2555	Soyabeans	Oil crops	tonnes	3.64044	0.958888
DMA	c022	2552	Groundnuts	Oil crops	tonnes	2.81502	0.9604
DMA	c023	2557	Sunflower seed	Oil crops	tonnes	4.64089	0.959822
DMA	c026	2560	Coconuts - Incl Copra	Oil crops	tonnes	0.926477	0.9604
DMA	c027	2561	Sesame seed	Oil crops	tonnes	5.50659	0.958641
DMA	c030	2570	Oilcrops, Other	Oil crops	tonnes	4.66542	0.953733
DMA	c111	2744	Eggs	Eggs	tonnes	1.27266	0.9216
DMA	c116	2734	Poultry Meat	Meat	tonnes	1.43145	0.893
DMA	c123	2960	Fish, Seafood	Fish	tonnes	0.798736	0.8908
DMA	c074	2577	Palm Oil	Vegetable oils	tonnes	2.53265	0.962714
DMA	c068	2571	Soyabean Oil	Vegetable oils	tonnes	7.56519	0.9604
DMA	c069	2572	Groundnut Oil	Vegetable oils	tonnes	6.69306	0.961588
DMA	c070	2573	Sunflowerseed Oil	Vegetable oils	tonnes	7.59803	0.958898
DMA	c071	2574	Rape and Mustard Oil	Vegetable oils	tonnes	5.25443	0.958914
DMA	c072	2575	Cottonseed Oil	Vegetable oils	tonnes	7.33575	0.962453
DMA	c073	2576	Palmkernel Oil	Vegetable oils	tonnes	4.59511	0.96095
DMA	c075	2578	Coconut Oil	Vegetable oils	tonnes	8.0694	0.9604
DMA	c076	2579	Sesameseed Oil	Vegetable oils	tonnes	8.91304	0.961456
DMA	c077	2580	Olive Oil	Vegetable oils	tonnes	8.65455	0.9604
DMA	c078	2581	Ricebran Oil	Vegetable oils	tonnes	9.53884	0.960333
DMA	c079	2582	Maize Germ Oil	Vegetable oils	tonnes	8.0303	0.9604
DMA	c080	2586	Oilcrops Oil, Other	Vegetable oils	tonnes	7.22819	0.9604
DMA	c119	2737	Fats, Animals, Raw	Animal fats	tonnes	6.9353	0.893
DMA	c015	2536	Sugar cane	Sugar crops	tonnes	0.0570153	1
DMA	c016	2537	Sugar beet	Sugar crops	tonnes	0.560855	1
DMA	c065	2541	Sugar non-centrifugal	Sugar, sweeteners	tonnes	3.78389	0.94335
DMA	c066	2542	Sugar (Raw Equivalent)	Sugar, sweeteners	tonnes	3.46516	0.94335
DMA	c067	2543	Sweeteners, Other	Sugar, sweeteners	tonnes	0.386788	0.94335
DMA	c121	2745	Honey	Honey	tonnes	3.19979	0.94335
DMA	c045	2630	Coffee and products	Coffee, tea, cocoa	tonnes	0.357242	1
DMA	c046	2633	Cocoa Beans and products	Coffee, tea, cocoa	tonnes	3.43742	1
DMA	c047	2635	Tea (including mate)	Coffee, tea, cocoa	tonnes	0.0944199	1
DMA	c090	2655	Wine	Alcohol	tonnes	0.759966	1
DMA	c091	2656	Beer	Alcohol	tonnes	0.533588	1
DMA	c092	2657	Beverages, Fermented	Alcohol	tonnes	0.495223	1
DMA	c093	2658	Beverages, Alcoholic	Alcohol	tonnes	2.83091	1
DMA	c117	2735	Meat, Other	Meat	tonnes	1.39729	0.893
DMA	c118	2736	Offals, Edible	Meat	tonnes	1.27994	0.893
DMA	c024	2558	Rape and Mustardseed	Oil crops	tonnes	0.976174	0.951511
DMA	c025	328	Seed cotton	Oil crops	tonnes		1
DMA	c028	254	Oil, palm fruit	Oil crops	tonnes		1
DMA	c029	2563	Olives (including preserved)	Oil crops	tonnes	0.989552	0.9604
DMA	c048	677	Hops	Vegetables, fruit, nuts, pulses, spices	tonnes		1
DMA	c053	2662	Jute	Fibre crops	tonnes		1
DMA	c054	2663	Jute-Like Fibres	Fibre crops	tonnes		1
DMA	c055	2664	Soft-Fibres, Other	Fibre crops	tonnes		1
DMA	c056	2665	Sisal	Fibre crops	tonnes		1
DMA	c057	2666	Abaca	Fibre crops	tonnes		1
DMA	c058	2667	Hard Fibres, Other	Fibre crops	tonnes		1
DMA	c059	2671	Tobacco	Tobacco, rubber	tonnes		1
DMA	c060	2672	Rubber	Tobacco, rubber	tonnes		1
DMA	c061	2000	Fodder crops	Fodder crops	tonnes		1
DMA	c062	2001	Grazing	Grazing	tonnes		1
DMA	c063	2559	Cottonseed	Fibre crops	tonnes	4.90679	1
DMA	c064	2562	Palm kernels	Oil crops	tonnes		1
DMA	c081	2590	Soyabean Cake	Oil cakes	tonnes		1
DMA	c082	2591	Groundnut Cake	Oil cakes	tonnes		1
DMA	c083	2592	Sunflowerseed Cake	Oil cakes	tonnes		1
DMA	c084	2593	Rape and Mustard Cake	Oil cakes	tonnes		1
DMA	c085	2594	Cottonseed Cake	Oil cakes	tonnes		1
DMA	c086	2595	Palmkernel Cake	Oil cakes	tonnes		1
DMA	c087	2596	Copra Cake	Oil cakes	tonnes		1
DMA	c088	2597	Sesameseed Cake	Oil cakes	tonnes		1
DMA	c089	2598	Oilseed Cakes, Other	Oil cakes	tonnes		1
DMA	c094	2659	Alcohol, Non-Food	Ethanol	tonnes		1
DMA	c095	2661	Cotton lint	Fibre crops	tonnes		1
DMA	c096	866	Cattle	Live animals	1000 Head		1
DMA	c097	946	Buffaloes	Live animals	1000 Head		1
DMA	c098	976	Sheep	Live animals	1000 Head		1
DMA	c099	1016	Goats	Live animals	1000 Head		1
DMA	c100	1034	Pigs	Live animals	1000 Head		1
DMA	c101	2029	Poultry Birds	Live animals	1000 Head		1
DMA	c102	1096	Horses	Live animals	1000 Head		1
DMA	c103	1107	Asses	Live animals	1000 Head		1
DMA	c104	1110	Mules	Live animals	1000 Head		1
DMA	c105	1126	Camels	Live animals	1000 Head		1
DMA	c106	1157	Camelids, other	Live animals	1000 Head		1
DMA	c107	1140	Rabbits and hares	Live animals	1000 Head		1
DMA	c108	1150	Rodents, other	Live animals	1000 Head		1
DMA	c112	2746	Wool (Clean Eq.)	Hides, skins, wool	tonnes		1
DMA	c120	2748	Hides and skins	Hides, skins, wool	tonnes		1
DMA	c122	2747	Silk	Hides, skins, wool	tonnes		1
DOM	c001	2807	Rice and products	Cereals	tonnes	2.2574	0.864
DOM	c002	2511	Wheat and products	Cereals	tonnes	2.35318	0.864
DOM	c003	2513	Barley and products	Cereals	tonnes	2.01239	0.864
DOM	c004	2514	Maize and products	Cereals	tonnes	3.28317	0.864
DOM	c005	2515	Rye and products	Cereals	tonnes	2.56517	0.7913
DOM	c006	2516	Oats	Cereals	tonnes	2.02628	0.864
DOM	c007	2517	Millet and products	Cereals	tonnes	3.09914	0.89695
DOM	c008	2518	Sorghum and products	Cereals	tonnes	3.33564	0.876178
DOM	c009	2520	Cereals, Other	Cereals	tonnes	2.19011	0.864
DOM	c010	2531	Potatoes and products	Roots and tubers	tonnes	0.600148	0.94672
DOM	c011	2532	Cassava and products	Roots and tubers	tonnes	1.2345	0.94672
DOM	c013	2534	Roots, Other	Roots and tubers	tonnes	0.941512	0.94672
DOM	c014	2535	Yams	Roots and tubers	tonnes	0.86725	0.94672
DOM	c012	2533	Sweet potatoes	Roots and tubers	tonnes	0.963611	0.94672
DOM	c031	2601	Tomatoes and products	Vegetables, fruit, nuts, pulses, spices	tonnes	0.183026	0.8811
DOM	c032	2602	Onions	Vegetables, fruit, nuts, pulses, spices	tonnes	0.388583	0.8811
DOM	c033	2605	Vegetables, Other	Vegetables, fruit, nuts, pulses, spices	tonnes	0.241936	0.8811
DOM	c049	2640	Pepper	Vegetables, fruit, nuts, pulses, spices	tonnes	2.35343	0.8811
DOM	c050	2641	Pimento	Vegetables, fruit, nuts, pulses, spices	tonnes	3.18772	0.8811
DOM	c051	2642	Cloves	Vegetables, fruit, nuts, pulses, spices	tonnes	2.77415	0.8811
DOM	c052	2645	Spices, Other	Vegetables, fruit, nuts, pulses, spices	tonnes	3.08603	0.8811
DOM	c034	2611	Oranges, Mandarines	Vegetables, fruit, nuts, pulses, spices	tonnes	0.247747	0.8811
DOM	c035	2612	Lemons, Limes and products	Vegetables, fruit, nuts, pulses, spices	tonnes	0.295494	0.8811
DOM	c036	2613	Grapefruit and products	Vegetables, fruit, nuts, pulses, spices	tonnes	0.212953	0.8811
DOM	c037	2614	Citrus, Other	Vegetables, fruit, nuts, pulses, spices	tonnes	0.55407	0.835814
DOM	c038	2615	Bananas	Vegetables, fruit, nuts, pulses, spices	tonnes	0.578266	0.8811
DOM	c039	2616	Plantains	Vegetables, fruit, nuts, pulses, spices	tonnes	0.739146	0.8811
DOM	c040	2617	Apples and products	Vegetables, fruit, nuts, pulses, spices	tonnes	0.278006	0.8811
DOM	c041	2618	Pineapples and products	Vegetables, fruit, nuts, pulses, spices	tonnes	0.289088	0.8811
DOM	c042	2619	Dates	Vegetables, fruit, nuts, pulses, spices	tonnes	2.04164	0.816697
DOM	c043	2620	Grapes and products (excl wine)	Vegetables, fruit, nuts, pulses, spices	tonnes	0.706647	0.8811
DOM	c044	2625	Fruits, Other	Vegetables, fruit, nuts, pulses, spices	tonnes	0.561929	0.8811
DOM	c109	2848	Milk - Excluding Butter	Milk	tonnes	0.838163	0.8832
DOM	c110	2740	Butter, Ghee	Milk	tonnes	6.8465	0.8832
DOM	c113	2731	Bovine Meat	Meat	tonnes	2.01151	0.893
DOM	c114	2732	Mutton & Goat Meat	Meat	tonnes	1.69697	0.893
DOM	c115	2733	Pigmeat	Meat	tonnes	1.53697	0.893
DOM	c017	2546	Beans	Vegetables, fruit, nuts, pulses, spices	tonnes	3.13115	0.9604
DOM	c018	2547	Peas	Vegetables, fruit, nuts, pulses, spices	tonnes	3.31739	0.9604
DOM	c019	2549	Pulses, Other and products	Vegetables, fruit, nuts, pulses, spices	tonnes	3.07992	0.9604
DOM	c020	2551	Nuts and products	Vegetables, fruit, nuts, pulses, spices	tonnes	1.07879	0.9604
DOM	c021	2555	Soyabeans	Oil crops	tonnes	3.64044	0.958888
DOM	c022	2552	Groundnuts	Oil crops	tonnes	1.37234	0.9604
DOM	c023	2557	Sunflower seed	Oil crops	tonnes	2.35343	0.959822
DOM	c026	2560	Coconuts - Incl Copra	Oil crops	tonnes	0.903147	0.9604
DOM	c027	2561	Sesame seed	Oil crops	tonnes	5.50659	0.958641
DOM	c030	2570	Oilcrops, Other	Oil crops	tonnes	4.66542	0.953733
DOM	c111	2744	Eggs	Eggs	tonnes	1.25946	0.9216
DOM	c116	2734	Poultry Meat	Meat	tonnes	1.37291	0.893
DOM	c123	2960	Fish, Seafood	Fish	tonnes	0.664942	0.8908
DOM	c074	2577	Palm Oil	Vegetable oils	tonnes	8.80344	0.9604
DOM	c068	2571	Soyabean Oil	Vegetable oils	tonnes	8.95992	0.9604
DOM	c069	2572	Groundnut Oil	Vegetable oils	tonnes	7.72619	0.9604
DOM	c070	2573	Sunflowerseed Oil	Vegetable oils	tonnes	8.43825	0.9604
DOM	c071	2574	Rape and Mustard Oil	Vegetable oils	tonnes	8.2509	0.958914
DOM	c072	2575	Cottonseed Oil	Vegetable oils	tonnes	7.33575	0.962453
DOM	c073	2576	Palmkernel Oil	Vegetable oils	tonnes	4.59511	0.96095
DOM	c075	2578	Coconut Oil	Vegetable oils	tonnes	9.33189	0.9604
DOM	c076	2579	Sesameseed Oil	Vegetable oils	tonnes	8.91304	0.961456
DOM	c077	2580	Olive Oil	Vegetable oils	tonnes	8.05227	0.9604
DOM	c078	2581	Ricebran Oil	Vegetable oils	tonnes	9.53884	0.960333
DOM	c079	2582	Maize Germ Oil	Vegetable oils	tonnes	8.31069	0.9604
DOM	c080	2586	Oilcrops Oil, Other	Vegetable oils	tonnes	3.89499	0.9604
DOM	c119	2737	Fats, Animals, Raw	Animal fats	tonnes	6.66216	0.893
DOM	c015	2536	Sugar cane	Sugar crops	tonnes	0.246434	1
DOM	c016	2537	Sugar beet	Sugar crops	tonnes	0.560855	1
DOM	c065	2541	Sugar non-centrifugal	Sugar, sweeteners	tonnes	3.78389	0.94335
DOM	c066	2542	Sugar (Raw Equivalent)	Sugar, sweeteners	tonnes	3.70915	0.94335
DOM	c067	2543	Sweeteners, Other	Sugar, sweeteners	tonnes	0.215727	0.94335
DOM	c121	2745	Honey	Honey	tonnes	2.07629	0.94335
DOM	c045	2630	Coffee and products	Coffee, tea, cocoa	tonnes	0.149739	1
DOM	c046	2633	Cocoa Beans and products	Coffee, tea, cocoa	tonnes	2.74035	1
DOM	c047	2635	Tea (including mate)	Coffee, tea, cocoa	tonnes	0.0944199	1
DOM	c090	2655	Wine	Alcohol	tonnes	0.750021	1
DOM	c091	2656	Beer	Alcohol	tonnes	0.437544	1
DOM	c092	2657	Beverages, Fermented	Alcohol	tonnes	0.495223	1
DOM	c093	2658	Beverages, Alcoholic	Alcohol	tonnes	2.79436	1
DOM	c117	2735	Meat, Other	Meat	tonnes	1.39729	0.893
DOM	c118	2736	Offals, Edible	Meat	tonnes	1.29893	0.893
DOM	c024	2558	Rape and Mustardseed	Oil crops	tonnes	0.976174	0.951511
DOM	c025	328	Seed cotton	Oil crops	tonnes		1
DOM	c028	254	Oil, palm fruit	Oil crops	tonnes		1
DOM	c029	2563	Olives (including preserved)	Oil crops	tonnes	0.999215	0.9604
DOM	c048	677	Hops	Vegetables, fruit, nuts, pulses, spices	tonnes		1
DOM	c053	2662	Jute	Fibre crops	tonnes		1
DOM	c054	2663	Jute-Like Fibres	Fibre crops	tonnes		1
DOM	c055	2664	Soft-Fibres, Other	Fibre crops	tonnes		1
DOM	c056	2665	Sisal	Fibre crops	tonnes		1
DOM	c057	2666	Abaca	Fibre crops	tonnes		1
DOM	c058	2667	Hard Fibres, Other	Fibre crops	tonnes		1
DOM	c059	2671	Tobacco	Tobacco, rubber	tonnes		1
DOM	c060	2672	Rubber	Tobacco, rubber	tonnes		1
DOM	c061	2000	Fodder crops	Fodder crops	tonnes		1
DOM	c062	2001	Grazing	Grazing	tonnes		1
DOM	c063	2559	Cottonseed	Fibre crops	tonnes	4.90679	1
DOM	c064	2562	Palm kernels	Oil crops	tonnes		1
DOM	c081	2590	Soyabean Cake	Oil cakes	tonnes		1
DOM	c082	2591	Groundnut Cake	Oil cakes	tonnes		1
DOM	c083	2592	Sunflowerseed Cake	Oil cakes	tonnes		1
DOM	c084	2593	Rape and Mustard Cake	Oil cakes	tonnes		1
DOM	c085	2594	Cottonseed Cake	Oil cakes	tonnes		1
DOM	c086	2595	Palmkernel Cake	Oil cakes	tonnes		1
DOM	c087	2596	Copra Cake	Oil cakes	tonnes		1
DOM	c088	2597	Sesameseed Cake	Oil cakes	tonnes		1
DOM	c089	2598	Oilseed Cakes, Other	Oil cakes	tonnes		1
DOM	c094	2659	Alcohol, Non-Food	Ethanol	tonnes		1
DOM	c095	2661	Cotton lint	Fibre crops	tonnes		1
DOM	c096	866	Cattle	Live animals	1000 Head		1
DOM	c097	946	Buffaloes	Live animals	1000 Head		1
DOM	c098	976	Sheep	Live animals	1000 Head		1
DOM	c099	1016	Goats	Live animals	1000 Head		1
DOM	c100	1034	Pigs	Live animals	1000 Head		1
DOM	c101	2029	Poultry Birds	Live animals	1000 Head		1
DOM	c102	1096	Horses	Live animals	1000 Head		1
DOM	c103	1107	Asses	Live animals	1000 Head		1
DOM	c104	1110	Mules	Live animals	1000 Head		1
DOM	c105	1126	Camels	Live animals	1000 Head		1
DOM	c106	1157	Camelids, other	Live animals	1000 Head		1
DOM	c107	1140	Rabbits and hares	Live animals	1000 Head		1
DOM	c108	1150	Rodents, other	Live animals	1000 Head		1
DOM	c112	2746	Wool (Clean Eq.)	Hides, skins, wool	tonnes		1
DOM	c120	2748	Hides and skins	Hides, skins, wool	tonnes		1
DOM	c122	2747	Silk	Hides, skins, wool	tonnes		1
BLR	c001	2807	Rice and products	Cereals	tonnes	2.39363	0.735
BLR	c002	2511	Wheat and products	Cereals	tonnes	2.81483	0.735
BLR	c003	2513	Barley and products	Cereals	tonnes	2.77372	0.735
BLR	c004	2514	Maize and products	Cereals	tonnes	2.59043	0.735
BLR	c005	2515	Rye and products	Cereals	tonnes	2.63525	0.735
BLR	c006	2516	Oats	Cereals	tonnes	2.04827	0.735
BLR	c007	2517	Millet and products	Cereals	tonnes	3.09914	0.89695
BLR	c008	2518	Sorghum and products	Cereals	tonnes	3.33564	0.876178
BLR	c009	2520	Cereals, Other	Cereals	tonnes	2.22376	0.735
BLR	c010	2531	Potatoes and products	Roots and tubers	tonnes	0.64517	0.831541
BLR	c011	2532	Cassava and products	Roots and tubers	tonnes	1.09645	0.922469
BLR	c013	2534	Roots, Other	Roots and tubers	tonnes	0.863013	0.922897
BLR	c014	2535	Yams	Roots and tubers	tonnes	0.873362	0.930556
BLR	c012	2533	Sweet potatoes	Roots and tubers	tonnes	0.887849	0.916853
BLR	c031	2601	Tomatoes and products	Vegetables, fruit, nuts, pulses, spices	tonnes	0.161872	0.7914
BLR	c032	2602	Onions	Vegetables, fruit, nuts, pulses, spices	tonnes	0.392474	0.7914
BLR	c033	2605	Vegetables, Other	Vegetables, fruit, nuts, pulses, spices	tonnes	0.255548	0.7914
BLR	c049	2640	Pepper	Vegetables, fruit, nuts, pulses, spices	tonnes	3.1556	0.7914
BLR	c050	2641	Pimento	Vegetables, fruit, nuts, pulses, spices	tonnes	3.18772	0.7914
BLR	c051	2642	Cloves	Vegetables, fruit, nuts, pulses, spices	tonnes	2.77415	0.849884
BLR	c052	2645	Spices, Other	Vegetables, fruit, nuts, pulses, spices	tonnes	2.15642	0.7914
BLR	c034	2611	Oranges, Mandarines	Vegetables, fruit, nuts, pulses, spices	tonnes	0.297874	0.7914
BLR	c035	2612	Lemons, Limes and products	Vegetables, fruit, nuts, pulses, spices	tonnes	0.298378	0.7914
BLR	c036	2613	Grapefruit and products	Vegetables, fruit, nuts, pulses, spices	tonnes	0.216661	0.7914
BLR	c037	2614	Citrus, Other	Vegetables, fruit, nuts, pulses, spices	tonnes	0.55407	0.7914
BLR	c038	2615	Bananas	Vegetables, fruit, nuts, pulses, spices	tonnes	0.666612	0.7914
BLR	c039	2616	Plantains	Vegetables, fruit, nuts, pulses, spices	tonnes	0.743545	0.7914
BLR	c040	2617	Apples and products	Vegetables, fruit, nuts, pulses, spices	tonnes	0.457749	0.7914
BLR	c041	2618	Pineapples and products	Vegetables, fruit, nuts, pulses, spices	tonnes	0.156767	0.7914
BLR	c042	2619	Dates	Vegetables, fruit, nuts, pulses, spices	tonnes	1.41192	0.7914
BLR	c043	2620	Grapes and products (excl wine)	Vegetables, fruit, nuts, pulses, spices	tonnes	0.723217	0.7914
BLR	c044	2625	Fruits, Other	Vegetables, fruit, nuts, pulses, spices	tonnes	0.481123	0.7914
BLR	c109	2848	Milk - Excluding Butter	Milk	tonnes	0.938656	0.92535
BLR	c110	2740	Butter, Ghee	Milk	tonnes	7.49438	0.92535
BLR	c113	2731	Bovine Meat	Meat	tonnes	1.80506	0.8544
BLR	c114	2732	Mutton & Goat Meat	Meat	tonnes	2.43313	0.8544
BLR	c115	2733	Pigmeat	Meat	tonnes	1.79822	0.8544
BLR	c017	2546	Beans	Vegetables, fruit, nuts, pulses, spices	tonnes	3.20596	0.959846
BLR	c018	2547	Peas	Vegetables, fruit, nuts, pulses, spices	tonnes	3.23954	0.960086
BLR	c019	2549	Pulses, Other and products	Vegetables, fruit, nuts, pulses, spices	tonnes	3.25314	0.9504
BLR	c020	2551	Nuts and products	Vegetables, fruit, nuts, pulses, spices	tonnes	1.84499	0.9504
BLR	c021	2555	Soyabeans	Oil crops	tonnes	3.54391	0.9504
BLR	c022	2552	Groundnuts	Oil crops	tonnes	2.6852	0.9504
BLR	c023	2557	Sunflower seed	Oil crops	tonnes	4.64089	0.959822
BLR	c026	2560	Coconuts - Incl Copra	Oil crops	tonnes	0.952572	0.9504
BLR	c027	2561	Sesame seed	Oil crops	tonnes	5.50659	0.958641
BLR	c030	2570	Oilcrops, Other	Oil crops	tonnes	4.66542	0.953733
BLR	c111	2744	Eggs	Eggs	tonnes	1.27628	0.9016
BLR	c116	2734	Poultry Meat	Meat	tonnes	1.38252	0.8544
BLR	c123	2960	Fish, Seafood	Fish	tonnes	0.631196	0.853196
BLR	c074	2577	Palm Oil	Vegetable oils	tonnes	2.53265	0.962714
BLR	c068	2571	Soyabean Oil	Vegetable oils	tonnes	9.13732	0.9504
BLR	c069	2572	Groundnut Oil	Vegetable oils	tonnes	6.69306	0.961588
BLR	c070	2573	Sunflowerseed Oil	Vegetable oils	tonnes	7.52789	0.9504
BLR	c071	2574	Rape and Mustard Oil	Vegetable oils	tonnes	4.03171	0.9504
BLR	c072	2575	Cottonseed Oil	Vegetable oils	tonnes	7.33575	0.962453
BLR	c073	2576	Palmkernel Oil	Vegetable oils	tonnes	4.59511	0.96095
BLR	c075	2578	Coconut Oil	Vegetable oils	tonnes	12.1183	0.9504
BLR	c076	2579	Sesameseed Oil	Vegetable oils	tonnes	8.91304	0.961456
BLR	c077	2580	Olive Oil	Vegetable oils	tonnes	6.84783	0.9504
BLR	c078	2581	Ricebran Oil	Vegetable oils	tonnes	9.53884	0.960333
BLR	c079	2582	Maize Germ Oil	Vegetable oils	tonnes	8.0303	0.9504
BLR	c080	2586	Oilcrops Oil, Other	Vegetable oils	tonnes	7.50941	0.9504
BLR	c119	2737	Fats, Animals, Raw	Animal fats	tonnes	5.49672	0.8544
BLR	c015	2536	Sugar cane	Sugar crops	tonnes	0.246434	1
BLR	c016	2537	Sugar beet	Sugar crops	tonnes	0.560855	1
BLR	c065	2541	Sugar non-centrifugal	Sugar, sweeteners	tonnes	3.78389	0.94335
BLR	c066	2542	Sugar (Raw Equivalent)	Sugar, sweeteners	tonnes	3.39623	0.94335
BLR	c067	2543	Sweeteners, Other	Sugar, sweeteners	tonnes	0.64144	0.94335
BLR	c121	2745	Honey	Honey	tonnes	3.73786	0.94335
BLR	c045	2630	Coffee and products	Coffee, tea, cocoa	tonnes	0.3438	1
BLR	c046	2633	Cocoa Beans and products	Coffee, tea, cocoa	tonnes	4.82796	1
BLR	c047	2635	Tea (including mate)	Coffee, tea, cocoa	tonnes	0.141108	1
BLR	c090	2655	Wine	Alcohol	tonnes	0.808746	1
BLR	c091	2656	Beer	Alcohol	tonnes	0.441475	1
BLR	c092	2657	Beverages, Fermented	Alcohol	tonnes	0.556509	1
BLR	c093	2658	Beverages, Alcoholic	Alcohol	tonnes	2.82862	1
BLR	c117	2735	Meat, Other	Meat	tonnes	1.93945	0.8544
BLR	c118	2736	Offals, Edible	Meat	tonnes	1.35207	0.8544
BLR	c024	2558	Rape and Mustardseed	Oil crops	tonnes	0.635048	0.951511
BLR	c025	328	Seed cotton	Oil crops	tonnes		1
BLR	c028	254	Oil, palm fruit	Oil crops	tonnes		1
BLR	c029	2563	Olives (including preserved)	Oil crops	tonnes	0.989552	0.9504
BLR	c048	677	Hops	Vegetables, fruit, nuts, pulses, spices	tonnes		1
BLR	c053	2662	Jute	Fibre crops	tonnes		1
BLR	c054	2663	Jute-Like Fibres	Fibre crops	tonnes		1
BLR	c055	2664	Soft-Fibres, Other	Fibre crops	tonnes		1
BLR	c056	2665	Sisal	Fibre crops	tonnes		1
BLR	c057	2666	Abaca	Fibre crops	tonnes		1
BLR	c058	2667	Hard Fibres, Other	Fibre crops	tonnes		1
BLR	c059	2671	Tobacco	Tobacco, rubber	tonnes		1
BLR	c060	2672	Rubber	Tobacco, rubber	tonnes		1
BLR	c061	2000	Fodder crops	Fodder crops	tonnes		1
BLR	c062	2001	Grazing	Grazing	tonnes		1
BLR	c063	2559	Cottonseed	Fibre crops	tonnes	4.90679	1
BLR	c064	2562	Palm kernels	Oil crops	tonnes		1
BLR	c081	2590	Soyabean Cake	Oil cakes	tonnes		1
BLR	c082	2591	Groundnut Cake	Oil cakes	tonnes		1
BLR	c083	2592	Sunflowerseed Cake	Oil cakes	tonnes		1
BLR	c084	2593	Rape and Mustard Cake	Oil cakes	tonnes		1
BLR	c085	2594	Cottonseed Cake	Oil cakes	tonnes		1
BLR	c086	2595	Palmkernel Cake	Oil cakes	tonnes		1
BLR	c087	2596	Copra Cake	Oil cakes	tonnes		1
BLR	c088	2597	Sesameseed Cake	Oil cakes	tonnes		1
BLR	c089	2598	Oilseed Cakes, Other	Oil cakes	tonnes		1
BLR	c094	2659	Alcohol, Non-Food	Ethanol	tonnes		1
BLR	c095	2661	Cotton lint	Fibre crops	tonnes		1
BLR	c096	866	Cattle	Live animals	1000 Head		1
BLR	c097	946	Buffaloes	Live animals	1000 Head		1
BLR	c098	976	Sheep	Live animals	1000 Head		1
BLR	c099	1016	Goats	Live animals	1000 Head		1
BLR	c100	1034	Pigs	Live animals	1000 Head		1
BLR	c101	2029	Poultry Birds	Live animals	1000 Head		1
BLR	c102	1096	Horses	Live animals	1000 Head		1
BLR	c103	1107	Asses	Live animals	1000 Head		1
BLR	c104	1110	Mules	Live animals	1000 Head		1
BLR	c105	1126	Camels	Live animals	1000 Head		1
BLR	c106	1157	Camelids, other	Live animals	1000 Head		1
BLR	c107	1140	Rabbits and hares	Live animals	1000 Head		1
BLR	c108	1150	Rodents, other	Live animals	1000 Head		1
BLR	c112	2746	Wool (Clean Eq.)	Hides, skins, wool	tonnes		1
BLR	c120	2748	Hides and skins	Hides, skins, wool	tonnes		1
BLR	c122	2747	Silk	Hides, skins, wool	tonnes		1
ECU	c001	2807	Rice and products	Cereals	tonnes	2.187	0.864
ECU	c002	2511	Wheat and products	Cereals	tonnes	2.58626	0.864
ECU	c003	2513	Barley and products	Cereals	tonnes	2.01239	0.831393
ECU	c004	2514	Maize and products	Cereals	tonnes	2.81353	0.864
ECU	c005	2515	Rye and products	Cereals	tonnes	2.56517	0.7913
ECU	c006	2516	Oats	Cereals	tonnes	2.20679	0.864
ECU	c007	2517	Millet and products	Cereals	tonnes	3.09914	0.89695
ECU	c008	2518	Sorghum and products	Cereals	tonnes	3.33564	0.876178
ECU	c009	2520	Cereals, Other	Cereals	tonnes	3.45017	0.864
ECU	c010	2531	Potatoes and products	Roots and tubers	tonnes	0.637656	0.94672
ECU	c011	2532	Cassava and products	Roots and tubers	tonnes	1.21881	0.94672
ECU	c013	2534	Roots, Other	Roots and tubers	tonnes	0.816088	0.94672
ECU	c014	2535	Yams	Roots and tubers	tonnes	0.873362	0.930556
ECU	c012	2533	Sweet potatoes	Roots and tubers	tonnes	1.02145	0.94672
ECU	c031	2601	Tomatoes and products	Vegetables, fruit, nuts, pulses, spices	tonnes	0.204662	0.8811
ECU	c032	2602	Onions	Vegetables, fruit, nuts, pulses, spices	tonnes	0.38545	0.8811
ECU	c033	2605	Vegetables, Other	Vegetables, fruit, nuts, pulses, spices	tonnes	0.336802	0.8811
ECU	c049	2640	Pepper	Vegetables, fruit, nuts, pulses, spices	tonnes	3.51055	0.8811
ECU	c050	2641	Pimento	Vegetables, fruit, nuts, pulses, spices	tonnes	3.18772	0.830619
ECU	c051	2642	Cloves	Vegetables, fruit, nuts, pulses, spices	tonnes	2.77415	0.849884
ECU	c052	2645	Spices, Other	Vegetables, fruit, nuts, pulses, spices	tonnes	3.06605	0.8811
ECU	c034	2611	Oranges, Mandarines	Vegetables, fruit, nuts, pulses, spices	tonnes	0.338587	0.8811
ECU	c035	2612	Lemons, Limes and products	Vegetables, fruit, nuts, pulses, spices	tonnes	0.297209	0.8811
ECU	c036	2613	Grapefruit and products	Vegetables, fruit, nuts, pulses, spices	tonnes	0.20425	0.8811
ECU	c037	2614	Citrus, Other	Vegetables, fruit, nuts, pulses, spices	tonnes	0.611999	0.8811
ECU	c038	2615	Bananas	Vegetables, fruit, nuts, pulses, spices	tonnes	0.656386	0.8811
ECU	c039	2616	Plantains	Vegetables, fruit, nuts, pulses, spices	tonnes	0.738794	0.8811
ECU	c040	2617	Apples and products	Vegetables, fruit, nuts, pulses, spices	tonnes	0.523945	0.8811
ECU	c041	2618	Pineapples and products	Vegetables, fruit, nuts, pulses, spices	tonnes	0.313338	0.8811
ECU	c042	2619	Dates	Vegetables, fruit, nuts, pulses, spices	tonnes	2.04164	0.816697
ECU	c043	2620	Grapes and products (excl wine)	Vegetables, fruit, nuts, pulses, spices	tonnes	0.710497	0.8811
ECU	c044	2625	Fruits, Other	Vegetables, fruit, nuts, pulses, spices	tonnes	0.449026	0.8811
ECU	c109	2848	Milk - Excluding Butter	Milk	tonnes	0.621845	0.8832
ECU	c110	2740	Butter, Ghee	Milk	tonnes	7.97852	0.8832
ECU	c113	2731	Bovine Meat	Meat	tonnes	2.04148	0.893
ECU	c114	2732	Mutton & Goat Meat	Meat	tonnes	2.34037	0.893
ECU	c115	2733	Pigmeat	Meat	tonnes	1.46257	0.893
ECU	c017	2546	Beans	Vegetables, fruit, nuts, pulses, spices	tonnes	3.15043	0.9604
ECU	c018	2547	Peas	Vegetables, fruit, nuts, pulses, spices	tonnes	3.38425	0.9604
ECU	c019	2549	Pulses, Other and products	Vegetables, fruit, nuts, pulses, spices	tonnes	3.20472	0.9604
ECU	c020	2551	Nuts and products	Vegetables, fruit, nuts, pulses, spices	tonnes	3.46226	0.9604
ECU	c021	2555	Soyabeans	Oil crops	tonnes	3.64044	0.958888
ECU	c022	2552	Groundnuts	Oil crops	tonnes	4.14732	0.9604
ECU	c023	2557	Sunflower seed	Oil crops	tonnes	5.7601	0.9604
ECU	c026	2560	Coconuts - Incl Copra	Oil crops	tonnes	0.893773	0.9604
ECU	c027	2561	Sesame seed	Oil crops	tonnes	5.50659	0.9604
ECU	c030	2570	Oilcrops, Other	Oil crops	tonnes	4.66542	0.953733
ECU	c111	2744	Eggs	Eggs	tonnes	1.26409	0.9216
ECU	c116	2734	Poultry Meat	Meat	tonnes	1.37034	0.893
ECU	c123	2960	Fish, Seafood	Fish	tonnes	0.618425	0.8908
ECU	c074	2577	Palm Oil	Vegetable oils	tonnes	7.61584	0.9604
ECU	c068	2571	Soyabean Oil	Vegetable oils	tonnes	8.66594	0.9604
ECU	c069	2572	Groundnut Oil	Vegetable oils	tonnes	6.69306	0.961588
ECU	c070	2573	Sunflowerseed Oil	Vegetable oils	tonnes	9.05635	0.9604
ECU	c071	2574	Rape and Mustard Oil	Vegetable oils	tonnes	5.25443	0.958914
ECU	c072	2575	Cottonseed Oil	Vegetable oils	tonnes	7.33575	0.962453
ECU	c073	2576	Palmkernel Oil	Vegetable oils	tonnes	4.59511	0.96095
ECU	c075	2578	Coconut Oil	Vegetable oils	tonnes	8.0694	0.959969
ECU	c076	2579	Sesameseed Oil	Vegetable oils	tonnes	8.91304	0.961456
ECU	c077	2580	Olive Oil	Vegetable oils	tonnes	9.57422	0.9604
ECU	c078	2581	Ricebran Oil	Vegetable oils	tonnes	9.53884	0.960333
ECU	c079	2582	Maize Germ Oil	Vegetable oils	tonnes	8.0303	0.9604
ECU	c080	2586	Oilcrops Oil, Other	Vegetable oils	tonnes	7.52202	0.9604
ECU	c119	2737	Fats, Animals, Raw	Animal fats	tonnes	15.1794	0.893
ECU	c015	2536	Sugar cane	Sugar crops	tonnes	0.246434	1
ECU	c016	2537	Sugar beet	Sugar crops	tonnes	0.560855	1
ECU	c065	2541	Sugar non-centrifugal	Sugar, sweeteners	tonnes	3.78389	0.94335
ECU	c066	2542	Sugar (Raw Equivalent)	Sugar, sweeteners	tonnes	2.16126	0.94335
ECU	c067	2543	Sweeteners, Other	Sugar, sweeteners	tonnes	0.431796	0.94335
ECU	c121	2745	Honey	Honey	tonnes	2.68078	0.94335
ECU	c045	2630	Coffee and products	Coffee, tea, cocoa	tonnes	0.357242	1
ECU	c046	2633	Cocoa Beans and products	Coffee, tea, cocoa	tonnes	5.7167	1
ECU	c047	2635	Tea (including mate)	Coffee, tea, cocoa	tonnes	0.191484	1
ECU	c090	2655	Wine	Alcohol	tonnes	0.829932	1
ECU	c091	2656	Beer	Alcohol	tonnes	0.437396	1
ECU	c092	2657	Beverages, Fermented	Alcohol	tonnes	0.495223	1
ECU	c093	2658	Beverages, Alcoholic	Alcohol	tonnes	2.97226	1
ECU	c117	2735	Meat, Other	Meat	tonnes	1.40422	0.893
ECU	c118	2736	Offals, Edible	Meat	tonnes	1.31696	0.893
ECU	c024	2558	Rape and Mustardseed	Oil crops	tonnes	5.23915	0.951511
ECU	c025	328	Seed cotton	Oil crops	tonnes		1
ECU	c028	254	Oil, palm fruit	Oil crops	tonnes		1
ECU	c029	2563	Olives (including preserved)	Oil crops	tonnes	0.957422	0.9604
ECU	c048	677	Hops	Vegetables, fruit, nuts, pulses, spices	tonnes		1
ECU	c053	2662	Jute	Fibre crops	tonnes		1
ECU	c054	2663	Jute-Like Fibres	Fibre crops	tonnes		1
ECU	c055	2664	Soft-Fibres, Other	Fibre crops	tonnes		1
ECU	c056	2665	Sisal	Fibre crops	tonnes		1
ECU	c057	2666	Abaca	Fibre crops	tonnes		1
ECU	c058	2667	Hard Fibres, Other	Fibre crops	tonnes		1
ECU	c059	2671	Tobacco	Tobacco, rubber	tonnes		1
ECU	c060	2672	Rubber	Tobacco, rubber	tonnes		1
ECU	c061	2000	Fodder crops	Fodder crops	tonnes		1
ECU	c062	2001	Grazing	Grazing	tonnes		1
ECU	c063	2559	Cottonseed	Fibre crops	tonnes	4.90679	1
ECU	c064	2562	Palm kernels	Oil crops	tonnes		1
ECU	c081	2590	Soyabean Cake	Oil cakes	tonnes		1
ECU	c082	2591	Groundnut Cake	Oil cakes	tonnes		1
ECU	c083	2592	Sunflowerseed Cake	Oil cakes	tonnes		1
ECU	c084	2593	Rape and Mustard Cake	Oil cakes	tonnes		1
ECU	c085	2594	Cottonseed Cake	Oil cakes	tonnes		1
ECU	c086	2595	Palmkernel Cake	Oil cakes	tonnes		1
ECU	c087	2596	Copra Cake	Oil cakes	tonnes		1
ECU	c088	2597	Sesameseed Cake	Oil cakes	tonnes		1
ECU	c089	2598	Oilseed Cakes, Other	Oil cakes	tonnes		1
ECU	c094	2659	Alcohol, Non-Food	Ethanol	tonnes		1
ECU	c095	2661	Cotton lint	Fibre crops	tonnes		1
ECU	c096	866	Cattle	Live animals	1000 Head		1
ECU	c097	946	Buffaloes	Live animals	1000 Head		1
ECU	c098	976	Sheep	Live animals	1000 Head		1
ECU	c099	1016	Goats	Live animals	1000 Head		1
ECU	c100	1034	Pigs	Live animals	1000 Head		1
ECU	c101	2029	Poultry Birds	Live animals	1000 Head		1
ECU	c102	1096	Horses	Live animals	1000 Head		1
ECU	c103	1107	Asses	Live animals	1000 Head		1
ECU	c104	1110	Mules	Live animals	1000 Head		1
ECU	c105	1126	Camels	Live animals	1000 Head		1
ECU	c106	1157	Camelids, other	Live animals	1000 Head		1
ECU	c107	1140	Rabbits and hares	Live animals	1000 Head		1
ECU	c108	1150	Rodents, other	Live animals	1000 Head		1
ECU	c112	2746	Wool (Clean Eq.)	Hides, skins, wool	tonnes		1
ECU	c120	2748	Hides and skins	Hides, skins, wool	tonnes		1
ECU	c122	2747	Silk	Hides, skins, wool	tonnes		1
SLV	c001	2807	Rice and products	Cereals	tonnes	2.26298	0.864
SLV	c002	2511	Wheat and products	Cereals	tonnes	2.6645	0.864
SLV	c003	2513	Barley and products	Cereals	tonnes	2.01239	0.831393
SLV	c004	2514	Maize and products	Cereals	tonnes	3.34924	0.864
SLV	c005	2515	Rye and products	Cereals	tonnes	2.56517	0.7913
SLV	c006	2516	Oats	Cereals	tonnes	1.92311	0.864
SLV	c007	2517	Millet and products	Cereals	tonnes	3.09914	0.89695
SLV	c008	2518	Sorghum and products	Cereals	tonnes	3.30125	0.864
SLV	c009	2520	Cereals, Other	Cereals	tonnes	0.538746	0.864
SLV	c010	2531	Potatoes and products	Roots and tubers	tonnes	0.625794	0.94672
SLV	c011	2532	Cassava and products	Roots and tubers	tonnes	0.798072	0.94672
SLV	c013	2534	Roots, Other	Roots and tubers	tonnes	0.930197	0.94672
SLV	c014	2535	Yams	Roots and tubers	tonnes	0.873362	0.930556
SLV	c012	2533	Sweet potatoes	Roots and tubers	tonnes	0.733612	0.94672
SLV	c031	2601	Tomatoes and products	Vegetables, fruit, nuts, pulses, spices	tonnes	0.181253	0.8811
SLV	c032	2602	Onions	Vegetables, fruit, nuts, pulses, spices	tonnes	0.391873	0.8811
SLV	c033	2605	Vegetables, Other	Vegetables, fruit, nuts, pulses, spices	tonnes	0.254962	0.8811
SLV	c049	2640	Pepper	Vegetables, fruit, nuts, pulses, spices	tonnes	3.1556	0.8811
SLV	c050	2641	Pimento	Vegetables, fruit, nuts, pulses, spices	tonnes	3.18772	0.8811
SLV	c051	2642	Cloves	Vegetables, fruit, nuts, pulses, spices	tonnes	2.77415	0.849884
SLV	c052	2645	Spices, Other	Vegetables, fruit, nuts, pulses, spices	tonnes	1.67021	0.8811
SLV	c034	2611	Oranges, Mandarines	Vegetables, fruit, nuts, pulses, spices	tonnes	0.326063	0.8811
SLV	c035	2612	Lemons, Limes and products	Vegetables, fruit, nuts, pulses, spices	tonnes	0.275104	0.8811
SLV	c036	2613	Grapefruit and products	Vegetables, fruit, nuts, pulses, spices	tonnes	0.220143	0.8811
SLV	c037	2614	Citrus, Other	Vegetables, fruit, nuts, pulses, spices	tonnes	0.55407	0.8811
SLV	c038	2615	Bananas	Vegetables, fruit, nuts, pulses, spices	tonnes	0.657086	0.8811
SLV	c039	2616	Plantains	Vegetables, fruit, nuts, pulses, spices	tonnes	0.741516	0.8811
SLV	c040	2617	Apples and products	Vegetables, fruit, nuts, pulses, spices	tonnes	0.290403	0.8811
SLV	c041	2618	Pineapples and products	Vegetables, fruit, nuts, pulses, spices	tonnes	0.102038	0.8811
SLV	c042	2619	Dates	Vegetables, fruit, nuts, pulses, spices	tonnes	2.04164	0.8811
SLV	c043	2620	Grapes and products (excl wine)	Vegetables, fruit, nuts, pulses, spices	tonnes	0.622006	0.8811
[truncated: 3,782 more rows]

## Sheet: S6
iso3c	comm_code	item_code	item	comm_group	unit	energy_content (kcal/g)	eat_ratio (1- food waste ratio)
DZA	c001	2807	Rice and products	Cereals	tonnes	2.33127	0.8448
DZA	c002	2511	Wheat and products	Cereals	tonnes	2.63306	0.8448
DZA	c003	2513	Barley and products	Cereals	tonnes	2.42512	0.8448
DZA	c004	2514	Maize and products	Cereals	tonnes	2.76945	0.8448
DZA	c005	2515	Rye and products	Cereals	tonnes	2.39509	0.868233
DZA	c006	2516	Oats	Cereals	tonnes	2.04589	0.912862
DZA	c007	2517	Millet and products	Cereals	tonnes	2.80841	0.947573
DZA	c008	2518	Sorghum and products	Cereals	tonnes	3.0042	0.8448
DZA	c009	2520	Cereals, Other	Cereals	tonnes	3.14879	0.8448
DZA	c010	2531	Potatoes and products	Roots and tubers	tonnes	0.638855	0.911558
DZA	c011	2532	Cassava and products	Roots and tubers	tonnes	1.07948	0.908826
DZA	c013	2534	Roots, Other	Roots and tubers	tonnes	0.835499	0.912752
DZA	c014	2535	Yams	Roots and tubers	tonnes	0.878775	0.926996
DZA	c012	2533	Sweet potatoes	Roots and tubers	tonnes	0.969722	0.915269
DZA	c031	2601	Tomatoes and products	Vegetables, fruit, nuts, pulses, spices	tonnes	0.214936	0.85415
DZA	c032	2602	Onions	Vegetables, fruit, nuts, pulses, spices	tonnes	0.387846	0.85415
DZA	c033	2605	Vegetables, Other	Vegetables, fruit, nuts, pulses, spices	tonnes	0.275507	0.85415
DZA	c049	2640	Pepper	Vegetables, fruit, nuts, pulses, spices	tonnes	2.77958	0.85415
DZA	c050	2641	Pimento	Vegetables, fruit, nuts, pulses, spices	tonnes	3.16312	0.85415
DZA	c051	2642	Cloves	Vegetables, fruit, nuts, pulses, spices	tonnes	1.88739	0.840547
DZA	c052	2645	Spices, Other	Vegetables, fruit, nuts, pulses, spices	tonnes	3.18048	0.85415
DZA	c034	2611	Oranges, Mandarines	Vegetables, fruit, nuts, pulses, spices	tonnes	0.327597	0.85415
DZA	c035	2612	Lemons, Limes and products	Vegetables, fruit, nuts, pulses, spices	tonnes	0.300449	0.85415
DZA	c036	2613	Grapefruit and products	Vegetables, fruit, nuts, pulses, spices	tonnes	0.236041	0.85415
DZA	c037	2614	Citrus, Other	Vegetables, fruit, nuts, pulses, spices	tonnes	0.629128	0.85415
DZA	c038	2615	Bananas	Vegetables, fruit, nuts, pulses, spices	tonnes	0.654318	0.85415
DZA	c039	2616	Plantains	Vegetables, fruit, nuts, pulses, spices	tonnes	0.314879	0.82674
DZA	c040	2617	Apples and products	Vegetables, fruit, nuts, pulses, spices	tonnes	0.522698	0.85415
DZA	c041	2618	Pineapples and products	Vegetables, fruit, nuts, pulses, spices	tonnes	0.0982982	0.85415
DZA	c042	2619	Dates	Vegetables, fruit, nuts, pulses, spices	tonnes	1.88209	0.85415
DZA	c043	2620	Grapes and products (excl wine)	Vegetables, fruit, nuts, pulses, spices	tonnes	0.659302	0.85415
DZA	c044	2625	Fruits, Other	Vegetables, fruit, nuts, pulses, spices	tonnes	0.489995	0.85415
DZA	c109	2848	Milk - Excluding Butter	Milk	tonnes	1.29045	0.9016
DZA	c110	2740	Butter, Ghee	Milk	tonnes	7.79175	0.9016
DZA	c113	2731	Bovine Meat	Meat	tonnes	1.94347	0.874
DZA	c114	2732	Mutton & Goat Meat	Meat	tonnes	2.15026	0.874
DZA	c115	2733	Pigmeat	Meat	tonnes	2.36159	0.892653
DZA	c017	2546	Beans	Vegetables, fruit, nuts, pulses, spices	tonnes	3.11231	0.9604
DZA	c018	2547	Peas	Vegetables, fruit, nuts, pulses, spices	tonnes	3.23598	0.9604
DZA	c019	2549	Pulses, Other and products	Vegetables, fruit, nuts, pulses, spices	tonnes	3.30217	0.9604
DZA	c020	2551	Nuts and products	Vegetables, fruit, nuts, pulses, spices	tonnes	2.41935	0.9604
DZA	c021	2555	Soyabeans	Oil crops	tonnes	3.10346	0.964694
DZA	c022	2552	Groundnuts	Oil crops	tonnes	1.5601	0.9604
DZA	c023	2557	Sunflower seed	Oil crops	tonnes	4.59893	0.966
DZA	c026	2560	Coconuts - Incl Copra	Oil crops	tonnes	1.23225	0.9604
DZA	c027	2561	Sesame seed	Oil crops	tonnes	6.21368	0.9604
DZA	c030	2570	Oilcrops, Other	Oil crops	tonnes	4.81674	0.966911
DZA	c111	2744	Eggs	Eggs	tonnes	1.25883	0.8448
DZA	c116	2734	Poultry Meat	Meat	tonnes	1.36311	0.874
DZA	c123	2960	Fish, Seafood	Fish	tonnes	0.72482	0.8908
DZA	c074	2577	Palm Oil	Vegetable oils	tonnes	3.26134	0.9604
DZA	c068	2571	Soyabean Oil	Vegetable oils	tonnes	8.92097	0.9604
DZA	c069	2572	Groundnut Oil	Vegetable oils	tonnes	9.03324	0.9604
DZA	c070	2573	Sunflowerseed Oil	Vegetable oils	tonnes	8.93109	0.9604
DZA	c071	2574	Rape and Mustard Oil	Vegetable oils	tonnes	7.17869	0.9604
DZA	c072	2575	Cottonseed Oil	Vegetable oils	tonnes	7.32827	0.96705
DZA	c073	2576	Palmkernel Oil	Vegetable oils	tonnes	8.5399	0.968975
DZA	c075	2578	Coconut Oil	Vegetable oils	tonnes	7.55332	0.9604
DZA	c076	2579	Sesameseed Oil	Vegetable oils	tonnes	8.78419	0.965613
DZA	c077	2580	Olive Oil	Vegetable oils	tonnes	8.93604	0.9604
DZA	c078	2581	Ricebran Oil	Vegetable oils	tonnes	8.3408	0.9702
DZA	c079	2582	Maize Germ Oil	Vegetable oils	tonnes	13.0675	0.9604
DZA	c080	2586	Oilcrops Oil, Other	Vegetable oils	tonnes	8.58689	0.9604
DZA	c119	2737	Fats, Animals, Raw	Animal fats	tonnes	6.74815	0.874
DZA	c015	2536	Sugar cane	Sugar crops	tonnes	0.326086	1
DZA	c016	2537	Sugar beet	Sugar crops	tonnes	0.557477	1
DZA	c065	2541	Sugar non-centrifugal	Sugar, sweeteners	tonnes	3.48406	0.94335
DZA	c066	2542	Sugar (Raw Equivalent)	Sugar, sweeteners	tonnes	3.29067	0.94335
DZA	c067	2543	Sweeteners, Other	Sugar, sweeteners	tonnes	1.15545	0.94335
DZA	c121	2745	Honey	Honey	tonnes	3.74331	0.94335
DZA	c045	2630	Coffee and products	Coffee, tea, cocoa	tonnes	0.293108	1
DZA	c046	2633	Cocoa Beans and products	Coffee, tea, cocoa	tonnes	2.82069	1
DZA	c047	2635	Tea (including mate)	Coffee, tea, cocoa	tonnes	0.13632	1
DZA	c090	2655	Wine	Alcohol	tonnes	0.471951	1
DZA	c091	2656	Beer	Alcohol	tonnes	0.436911	1
DZA	c092	2657	Beverages, Fermented	Alcohol	tonnes	0.355754	1
DZA	c093	2658	Beverages, Alcoholic	Alcohol	tonnes	2.63645	1
DZA	c117	2735	Meat, Other	Meat	tonnes	1.20583	0.874
DZA	c118	2736	Offals, Edible	Meat	tonnes	1.16241	0.874
DZA	c024	2558	Rape and Mustardseed	Oil crops	tonnes	1.41696	0.951511
DZA	c025	328	Seed cotton	Oil crops	tonnes		1
DZA	c028	254	Oil, palm fruit	Oil crops	tonnes		1
DZA	c029	2563	Olives (including preserved)	Oil crops	tonnes	1.34326	0.9604
DZA	c048	677	Hops	Vegetables, fruit, nuts, pulses, spices	tonnes		1
DZA	c053	2662	Jute	Fibre crops	tonnes		1
DZA	c054	2663	Jute-Like Fibres	Fibre crops	tonnes		1
DZA	c055	2664	Soft-Fibres, Other	Fibre crops	tonnes		1
DZA	c056	2665	Sisal	Fibre crops	tonnes		1
DZA	c057	2666	Abaca	Fibre crops	tonnes		1
DZA	c058	2667	Hard Fibres, Other	Fibre crops	tonnes		1
DZA	c059	2671	Tobacco	Tobacco, rubber	tonnes		1
DZA	c060	2672	Rubber	Tobacco, rubber	tonnes		1
DZA	c061	2000	Fodder crops	Fodder crops	tonnes		1
DZA	c062	2001	Grazing	Grazing	tonnes		1
DZA	c063	2559	Cottonseed	Fibre crops	tonnes	4.90679	1
DZA	c064	2562	Palm kernels	Oil crops	tonnes		1
DZA	c081	2590	Soyabean Cake	Oil cakes	tonnes		1
DZA	c082	2591	Groundnut Cake	Oil cakes	tonnes		1
DZA	c083	2592	Sunflowerseed Cake	Oil cakes	tonnes		1
DZA	c084	2593	Rape and Mustard Cake	Oil cakes	tonnes		1
DZA	c085	2594	Cottonseed Cake	Oil cakes	tonnes		1
DZA	c086	2595	Palmkernel Cake	Oil cakes	tonnes		1
DZA	c087	2596	Copra Cake	Oil cakes	tonnes		1
DZA	c088	2597	Sesameseed Cake	Oil cakes	tonnes		1
DZA	c089	2598	Oilseed Cakes, Other	Oil cakes	tonnes		1
DZA	c094	2659	Alcohol, Non-Food	Ethanol	tonnes		1
DZA	c095	2661	Cotton lint	Fibre crops	tonnes		1
DZA	c096	866	Cattle	Live animals	1000 Head		1
DZA	c097	946	Buffaloes	Live animals	1000 Head		1
DZA	c098	976	Sheep	Live animals	1000 Head		1
DZA	c099	1016	Goats	Live animals	1000 Head		1
DZA	c100	1034	Pigs	Live animals	1000 Head		1
DZA	c101	2029	Poultry Birds	Live animals	1000 Head		1
DZA	c102	1096	Horses	Live animals	1000 Head		1
DZA	c103	1107	Asses	Live animals	1000 Head		1
DZA	c104	1110	Mules	Live animals	1000 Head		1
DZA	c105	1126	Camels	Live animals	1000 Head		1
DZA	c106	1157	Camelids, other	Live animals	1000 Head		1
DZA	c107	1140	Rabbits and hares	Live animals	1000 Head		1
DZA	c108	1150	Rodents, other	Live animals	1000 Head		1
DZA	c112	2746	Wool (Clean Eq.)	Hides, skins, wool	tonnes		1
DZA	c120	2748	Hides and skins	Hides, skins, wool	tonnes		1
DZA	c122	2747	Silk	Hides, skins, wool	tonnes		1
AGO	c001	2807	Rice and products	Cereals	tonnes	2.32284	0.9702
AGO	c002	2511	Wheat and products	Cereals	tonnes	2.40466	0.9702
AGO	c003	2513	Barley and products	Cereals	tonnes	2.52978	0.894515
AGO	c004	2514	Maize and products	Cereals	tonnes	3.12645	0.9702
AGO	c005	2515	Rye and products	Cereals	tonnes	2.39509	0.868233
AGO	c006	2516	Oats	Cereals	tonnes	2.64708	0.9702
AGO	c007	2517	Millet and products	Cereals	tonnes	3.10496	0.9702
AGO	c008	2518	Sorghum and products	Cereals	tonnes	3.0042	0.926592
AGO	c009	2520	Cereals, Other	Cereals	tonnes	2.5814	0.903639
AGO	c010	2531	Potatoes and products	Roots and tubers	tonnes	0.633636	0.9506
AGO	c011	2532	Cassava and products	Roots and tubers	tonnes	1.03504	0.9506
AGO	c013	2534	Roots, Other	Roots and tubers	tonnes	0.835499	0.912752
AGO	c014	2535	Yams	Roots and tubers	tonnes	0.878775	0.926996
AGO	c012	2533	Sweet potatoes	Roots and tubers	tonnes	0.96393	0.9506
AGO	c031	2601	Tomatoes and products	Vegetables, fruit, nuts, pulses, spices	tonnes	0.203004	0.789525
AGO	c032	2602	Onions	Vegetables, fruit, nuts, pulses, spices	tonnes	0.382216	0.789525
AGO	c033	2605	Vegetables, Other	Vegetables, fruit, nuts, pulses, spices	tonnes	0.244632	0.789525
AGO	c049	2640	Pepper	Vegetables, fruit, nuts, pulses, spices	tonnes	2.9242	0.824316
AGO	c050	2641	Pimento	Vegetables, fruit, nuts, pulses, spices	tonnes	3.20593	0.821392
AGO	c051	2642	Cloves	Vegetables, fruit, nuts, pulses, spices	tonnes	2.07481	0.840547
AGO	c052	2645	Spices, Other	Vegetables, fruit, nuts, pulses, spices	tonnes	2.88484	0.789525
AGO	c034	2611	Oranges, Mandarines	Vegetables, fruit, nuts, pulses, spices	tonnes	0.330472	0.789525
AGO	c035	2612	Lemons, Limes and products	Vegetables, fruit, nuts, pulses, spices	tonnes	0.240163	0.830742
AGO	c036	2613	Grapefruit and products	Vegetables, fruit, nuts, pulses, spices	tonnes	0.171836	0.8276
AGO	c037	2614	Citrus, Other	Vegetables, fruit, nuts, pulses, spices	tonnes	0.60521	0.789525
AGO	c038	2615	Bananas	Vegetables, fruit, nuts, pulses, spices	tonnes	0.515911	0.789525
AGO	c039	2616	Plantains	Vegetables, fruit, nuts, pulses, spices	tonnes	0.736155	0.82674
AGO	c040	2617	Apples and products	Vegetables, fruit, nuts, pulses, spices	tonnes	0.480566	0.789525
AGO	c041	2618	Pineapples and products	Vegetables, fruit, nuts, pulses, spices	tonnes	0.288156	0.789525
AGO	c042	2619	Dates	Vegetables, fruit, nuts, pulses, spices	tonnes	1.92952	0.819737
AGO	c043	2620	Grapes and products (excl wine)	Vegetables, fruit, nuts, pulses, spices	tonnes	0.653528	0.789525
AGO	c044	2625	Fruits, Other	Vegetables, fruit, nuts, pulses, spices	tonnes	1.67137	0.789525
AGO	c109	2848	Milk - Excluding Butter	Milk	tonnes	1.06694	0.8991
AGO	c110	2740	Butter, Ghee	Milk	tonnes	9.62576	0.8991
AGO	c113	2731	Bovine Meat	Meat	tonnes	1.94136	0.9114
AGO	c114	2732	Mutton & Goat Meat	Meat	tonnes	1.39775	0.9114
AGO	c115	2733	Pigmeat	Meat	tonnes	2.3581	0.9114
AGO	c017	2546	Beans	Vegetables, fruit, nuts, pulses, spices	tonnes	2.76194	0.9702
AGO	c018	2547	Peas	Vegetables, fruit, nuts, pulses, spices	tonnes	3.1961	0.965547
AGO	c019	2549	Pulses, Other and products	Vegetables, fruit, nuts, pulses, spices	tonnes	3.5768	0.9702
AGO	c020	2551	Nuts and products	Vegetables, fruit, nuts, pulses, spices	tonnes	2.68361	0.9702
AGO	c021	2555	Soyabeans	Oil crops	tonnes	3.9055	0.9702
AGO	c022	2552	Groundnuts	Oil crops	tonnes	4.03707	0.9702
AGO	c023	2557	Sunflower seed	Oil crops	tonnes	4.59893	0.966
AGO	c026	2560	Coconuts - Incl Copra	Oil crops	tonnes	1.5595	0.9702
AGO	c027	2561	Sesame seed	Oil crops	tonnes	5.6038	0.9702
AGO	c030	2570	Oilcrops, Other	Oil crops	tonnes	4.81674	0.966911
AGO	c111	2744	Eggs	Eggs	tonnes	1.56106	0.9603
AGO	c116	2734	Poultry Meat	Meat	tonnes	1.35116	0.9114
AGO	c123	2960	Fish, Seafood	Fish	tonnes	0.708921	0.8562
AGO	c074	2577	Palm Oil	Vegetable oils	tonnes	8.84719	0.9702
AGO	c068	2571	Soyabean Oil	Vegetable oils	tonnes	8.89831	0.9702
AGO	c069	2572	Groundnut Oil	Vegetable oils	tonnes	8.75766	0.9702
AGO	c070	2573	Sunflowerseed Oil	Vegetable oils	tonnes	9.26209	0.9702
AGO	c071	2574	Rape and Mustard Oil	Vegetable oils	tonnes	7.11596	0.96529
AGO	c072	2575	Cottonseed Oil	Vegetable oils	tonnes	4.92333	0.9702
AGO	c073	2576	Palmkernel Oil	Vegetable oils	tonnes	8.33064	0.9702
AGO	c075	2578	Coconut Oil	Vegetable oils	tonnes	8.42957	0.965137
AGO	c076	2579	Sesameseed Oil	Vegetable oils	tonnes	8.78419	0.965613
AGO	c077	2580	Olive Oil	Vegetable oils	tonnes	8.65162	0.9702
AGO	c078	2581	Ricebran Oil	Vegetable oils	tonnes	8.3408	0.9702
AGO	c079	2582	Maize Germ Oil	Vegetable oils	tonnes	8.92176	0.963509
AGO	c080	2586	Oilcrops Oil, Other	Vegetable oils	tonnes	7.24517	0.9702
AGO	c119	2737	Fats, Animals, Raw	Animal fats	tonnes	7.03341	0.9114
AGO	c015	2536	Sugar cane	Sugar crops	tonnes	0.326086	1
AGO	c016	2537	Sugar beet	Sugar crops	tonnes	0.557477	1
AGO	c065	2541	Sugar non-centrifugal	Sugar, sweeteners	tonnes	3.48406	0.94335
AGO	c066	2542	Sugar (Raw Equivalent)	Sugar, sweeteners	tonnes	3.14714	0.94335
AGO	c067	2543	Sweeteners, Other	Sugar, sweeteners	tonnes	0.332475	0.94335
AGO	c121	2745	Honey	Honey	tonnes	3.3077	0.94335
AGO	c045	2630	Coffee and products	Coffee, tea, cocoa	tonnes	0.406398	1
AGO	c046	2633	Cocoa Beans and products	Coffee, tea, cocoa	tonnes	8.18926	1
AGO	c047	2635	Tea (including mate)	Coffee, tea, cocoa	tonnes	0.0311573	1
AGO	c090	2655	Wine	Alcohol	tonnes	0.786875	1
AGO	c091	2656	Beer	Alcohol	tonnes	0.433194	1
AGO	c092	2657	Beverages, Fermented	Alcohol	tonnes	0.472578	1
AGO	c093	2658	Beverages, Alcoholic	Alcohol	tonnes	2.73965	1
AGO	c117	2735	Meat, Other	Meat	tonnes	1.3329	0.9114
AGO	c118	2736	Offals, Edible	Meat	tonnes	1.25191	0.9114
AGO	c024	2558	Rape and Mustardseed	Oil crops	tonnes	2.02361	0.951511
AGO	c025	328	Seed cotton	Oil crops	tonnes		1
AGO	c028	254	Oil, palm fruit	Oil crops	tonnes		1
AGO	c029	2563	Olives (including preserved)	Oil crops	tonnes	0.841411	0.96352
AGO	c048	677	Hops	Vegetables, fruit, nuts, pulses, spices	tonnes		1
AGO	c053	2662	Jute	Fibre crops	tonnes		1
AGO	c054	2663	Jute-Like Fibres	Fibre crops	tonnes		1
AGO	c055	2664	Soft-Fibres, Other	Fibre crops	tonnes		1
AGO	c056	2665	Sisal	Fibre crops	tonnes		1
AGO	c057	2666	Abaca	Fibre crops	tonnes		1
AGO	c058	2667	Hard Fibres, Other	Fibre crops	tonnes		1
AGO	c059	2671	Tobacco	Tobacco, rubber	tonnes		1
AGO	c060	2672	Rubber	Tobacco, rubber	tonnes		1
AGO	c061	2000	Fodder crops	Fodder crops	tonnes		1
AGO	c062	2001	Grazing	Grazing	tonnes		1
AGO	c063	2559	Cottonseed	Fibre crops	tonnes	4.90679	1
AGO	c064	2562	Palm kernels	Oil crops	tonnes		1
AGO	c081	2590	Soyabean Cake	Oil cakes	tonnes		1
AGO	c082	2591	Groundnut Cake	Oil cakes	tonnes		1
AGO	c083	2592	Sunflowerseed Cake	Oil cakes	tonnes		1
AGO	c084	2593	Rape and Mustard Cake	Oil cakes	tonnes		1
AGO	c085	2594	Cottonseed Cake	Oil cakes	tonnes		1
AGO	c086	2595	Palmkernel Cake	Oil cakes	tonnes		1
AGO	c087	2596	Copra Cake	Oil cakes	tonnes		1
AGO	c088	2597	Sesameseed Cake	Oil cakes	tonnes		1
AGO	c089	2598	Oilseed Cakes, Other	Oil cakes	tonnes		1
AGO	c094	2659	Alcohol, Non-Food	Ethanol	tonnes		1
AGO	c095	2661	Cotton lint	Fibre crops	tonnes		1
AGO	c096	866	Cattle	Live animals	1000 Head		1
AGO	c097	946	Buffaloes	Live animals	1000 Head		1
AGO	c098	976	Sheep	Live animals	1000 Head		1
AGO	c099	1016	Goats	Live animals	1000 Head		1
AGO	c100	1034	Pigs	Live animals	1000 Head		1
AGO	c101	2029	Poultry Birds	Live animals	1000 Head		1
AGO	c102	1096	Horses	Live animals	1000 Head		1
AGO	c103	1107	Asses	Live animals	1000 Head		1
AGO	c104	1110	Mules	Live animals	1000 Head		1
AGO	c105	1126	Camels	Live animals	1000 Head		1
AGO	c106	1157	Camelids, other	Live animals	1000 Head		1
AGO	c107	1140	Rabbits and hares	Live animals	1000 Head		1
AGO	c108	1150	Rodents, other	Live animals	1000 Head		1
AGO	c112	2746	Wool (Clean Eq.)	Hides, skins, wool	tonnes		1
AGO	c120	2748	Hides and skins	Hides, skins, wool	tonnes		1
AGO	c122	2747	Silk	Hides, skins, wool	tonnes		1
BGD	c001	2807	Rice and products	Cereals	tonnes	2.39774	0.9506
BGD	c002	2511	Wheat and products	Cereals	tonnes	3.07093	0.9506
BGD	c003	2513	Barley and products	Cereals	tonnes	2.81002	0.894515
BGD	c004	2514	Maize and products	Cereals	tonnes	3.45381	0.9506
BGD	c005	2515	Rye and products	Cereals	tonnes	2.39509	0.868233
BGD	c006	2516	Oats	Cereals	tonnes	1.22102	0.912862
BGD	c007	2517	Millet and products	Cereals	tonnes	3.30727	0.9506
BGD	c008	2518	Sorghum and products	Cereals	tonnes	3.0042	0.926592
BGD	c009	2520	Cereals, Other	Cereals	tonnes	3.6484	0.903639
BGD	c010	2531	Potatoes and products	Roots and tubers	tonnes	0.641594	0.86437
BGD	c011	2532	Cassava and products	Roots and tubers	tonnes	3.37514	0.86437
BGD	c013	2534	Roots, Other	Roots and tubers	tonnes	0.608067	0.912752
BGD	c014	2535	Yams	Roots and tubers	tonnes	0.878775	0.926996
BGD	c012	2533	Sweet potatoes	Roots and tubers	tonnes	0.974074	0.86437
BGD	c031	2601	Tomatoes and products	Vegetables, fruit, nuts, pulses, spices	tonnes	0.202966	0.8397
BGD	c032	2602	Onions	Vegetables, fruit, nuts, pulses, spices	tonnes	0.388655	0.8397
BGD	c033	2605	Vegetables, Other	Vegetables, fruit, nuts, pulses, spices	tonnes	0.349659	0.8397
BGD	c049	2640	Pepper	Vegetables, fruit, nuts, pulses, spices	tonnes	2.43105	0.824316
BGD	c050	2641	Pimento	Vegetables, fruit, nuts, pulses, spices	tonnes	3.17768	0.8397
BGD	c051	2642	Cloves	Vegetables, fruit, nuts, pulses, spices	tonnes	2.42983	0.840547
BGD	c052	2645	Spices, Other	Vegetables, fruit, nuts, pulses, spices	tonnes	2.59358	0.8397
BGD	c034	2611	Oranges, Mandarines	Vegetables, fruit, nuts, pulses, spices	tonnes	0.304671	0.8397
BGD	c035	2612	Lemons, Limes and products	Vegetables, fruit, nuts, pulses, spices	tonnes	0.297999	0.8397
BGD	c036	2613	Grapefruit and products	Vegetables, fruit, nuts, pulses, spices	tonnes	0.229849	0.8397
BGD	c037	2614	Citrus, Other	Vegetables, fruit, nuts, pulses, spices	tonnes	0.607324	0.8397
BGD	c038	2615	Bananas	Vegetables, fruit, nuts, pulses, spices	tonnes	0.655309	0.8397
BGD	c039	2616	Plantains	Vegetables, fruit, nuts, pulses, spices	tonnes	0.739853	0.82674
BGD	c040	2617	Apples and products	Vegetables, fruit, nuts, pulses, spices	tonnes	0.523028	0.8397
BGD	c041	2618	Pineapples and products	Vegetables, fruit, nuts, pulses, spices	tonnes	0.29158	0.8397
BGD	c042	2619	Dates	Vegetables, fruit, nuts, pulses, spices	tonnes	2.01498	0.8397
BGD	c043	2620	Grapes and products (excl wine)	Vegetables, fruit, nuts, pulses, spices	tonnes	0.694261	0.8397
BGD	c044	2625	Fruits, Other	Vegetables, fruit, nuts, pulses, spices	tonnes	0.447401	0.8397
BGD	c109	2848	Milk - Excluding Butter	Milk	tonnes	0.838421	0.891
BGD	c110	2740	Butter, Ghee	Milk	tonnes	8.83549	0.891
BGD	c113	2731	Bovine Meat	Meat	tonnes	1.98153	0.8928
BGD	c114	2732	Mutton & Goat Meat	Meat	tonnes	1.25699	0.8928
BGD	c115	2733	Pigmeat	Meat	tonnes	2.20423	0.892653
BGD	c017	2546	Beans	Vegetables, fruit, nuts, pulses, spices	tonnes	3.11758	0.9702
BGD	c018	2547	Peas	Vegetables, fruit, nuts, pulses, spices	tonnes	3.21395	0.9702
BGD	c019	2549	Pulses, Other and products	Vegetables, fruit, nuts, pulses, spices	tonnes	3.29995	0.9702
BGD	c020	2551	Nuts and products	Vegetables, fruit, nuts, pulses, spices	tonnes	0.219664	0.9702
BGD	c021	2555	Soyabeans	Oil crops	tonnes	4.03917	0.9702
BGD	c022	2552	Groundnuts	Oil crops	tonnes	4.14252	0.9702
BGD	c023	2557	Sunflower seed	Oil crops	tonnes	4.59893	0.966
BGD	c026	2560	Coconuts - Incl Copra	Oil crops	tonnes	0.851271	0.9702
BGD	c027	2561	Sesame seed	Oil crops	tonnes	5.80189	0.965669
BGD	c030	2570	Oilcrops, Other	Oil crops	tonnes	4.81674	0.966911
BGD	c111	2744	Eggs	Eggs	tonnes	1.34227	0.9506
BGD	c116	2734	Poultry Meat	Meat	tonnes	1.46106	0.8928
BGD	c123	2960	Fish, Seafood	Fish	tonnes	0.731294	0.8562
BGD	c074	2577	Palm Oil	Vegetable oils	tonnes	8.93001	0.9702
BGD	c068	2571	Soyabean Oil	Vegetable oils	tonnes	8.94746	0.9702
BGD	c069	2572	Groundnut Oil	Vegetable oils	tonnes	8.97689	0.9702
BGD	c070	2573	Sunflowerseed Oil	Vegetable oils	tonnes	9.11796	0.965923
BGD	c071	2574	Rape and Mustard Oil	Vegetable oils	tonnes	8.92152	0.9702
BGD	c072	2575	Cottonseed Oil	Vegetable oils	tonnes	8.35255	0.9702
BGD	c073	2576	Palmkernel Oil	Vegetable oils	tonnes	8.5399	0.968975
BGD	c075	2578	Coconut Oil	Vegetable oils	tonnes	8.7474	0.9702
BGD	c076	2579	Sesameseed Oil	Vegetable oils	tonnes	9.26374	0.9702
BGD	c077	2580	Olive Oil	Vegetable oils	tonnes	11.5302	0.965035
BGD	c078	2581	Ricebran Oil	Vegetable oils	tonnes	8.09945	0.9702
BGD	c079	2582	Maize Germ Oil	Vegetable oils	tonnes	8.92176	0.963509
BGD	c080	2586	Oilcrops Oil, Other	Vegetable oils	tonnes	8.1211	0.964576
BGD	c119	2737	Fats, Animals, Raw	Animal fats	tonnes	6.4716	0.8928
BGD	c015	2536	Sugar cane	Sugar crops	tonnes	0.327875	1
BGD	c016	2537	Sugar beet	Sugar crops	tonnes	0.557477	1
BGD	c065	2541	Sugar non-centrifugal	Sugar, sweeteners	tonnes	3.78784	0.94335
BGD	c066	2542	Sugar (Raw Equivalent)	Sugar, sweeteners	tonnes	1.74237	0.94335
BGD	c067	2543	Sweeteners, Other	Sugar, sweeteners	tonnes	0.531045	0.94335
BGD	c121	2745	Honey	Honey	tonnes	2.43715	0.94335
BGD	c045	2630	Coffee and products	Coffee, tea, cocoa	tonnes	0.972128	1
BGD	c046	2633	Cocoa Beans and products	Coffee, tea, cocoa	tonnes	1.67051	1
BGD	c047	2635	Tea (including mate)	Coffee, tea, cocoa	tonnes	0.0311573	1
BGD	c090	2655	Wine	Alcohol	tonnes	0.782909	1
BGD	c091	2656	Beer	Alcohol	tonnes	0.405243	1
BGD	c092	2657	Beverages, Fermented	Alcohol	tonnes	0.355754	1
BGD	c093	2658	Beverages, Alcoholic	Alcohol	tonnes	1.82603	1
BGD	c117	2735	Meat, Other	Meat	tonnes	1.33285	0.893105
BGD	c118	2736	Offals, Edible	Meat	tonnes	1.10272	0.8928
BGD	c024	2558	Rape and Mustardseed	Oil crops	tonnes	2.02361	0.951511
BGD	c025	328	Seed cotton	Oil crops	tonnes		1
BGD	c028	254	Oil, palm fruit	Oil crops	tonnes		1
BGD	c029	2563	Olives (including preserved)	Oil crops	tonnes	1.29236	0.96352
BGD	c048	677	Hops	Vegetables, fruit, nuts, pulses, spices	tonnes		1
BGD	c053	2662	Jute	Fibre crops	tonnes		1
BGD	c054	2663	Jute-Like Fibres	Fibre crops	tonnes		1
BGD	c055	2664	Soft-Fibres, Other	Fibre crops	tonnes		1
BGD	c056	2665	Sisal	Fibre crops	tonnes		1
BGD	c057	2666	Abaca	Fibre crops	tonnes		1
BGD	c058	2667	Hard Fibres, Other	Fibre crops	tonnes		1
BGD	c059	2671	Tobacco	Tobacco, rubber	tonnes		1
BGD	c060	2672	Rubber	Tobacco, rubber	tonnes		1
BGD	c061	2000	Fodder crops	Fodder crops	tonnes		1
BGD	c062	2001	Grazing	Grazing	tonnes		1
BGD	c063	2559	Cottonseed	Fibre crops	tonnes	4.90679	1
BGD	c064	2562	Palm kernels	Oil crops	tonnes		1
BGD	c081	2590	Soyabean Cake	Oil cakes	tonnes		1
BGD	c082	2591	Groundnut Cake	Oil cakes	tonnes		1
BGD	c083	2592	Sunflowerseed Cake	Oil cakes	tonnes		1
BGD	c084	2593	Rape and Mustard Cake	Oil cakes	tonnes		1
BGD	c085	2594	Cottonseed Cake	Oil cakes	tonnes		1
BGD	c086	2595	Palmkernel Cake	Oil cakes	tonnes		1
BGD	c087	2596	Copra Cake	Oil cakes	tonnes		1
BGD	c088	2597	Sesameseed Cake	Oil cakes	tonnes		1
BGD	c089	2598	Oilseed Cakes, Other	Oil cakes	tonnes		1
BGD	c094	2659	Alcohol, Non-Food	Ethanol	tonnes		1
BGD	c095	2661	Cotton lint	Fibre crops	tonnes		1
BGD	c096	866	Cattle	Live animals	1000 Head		1
BGD	c097	946	Buffaloes	Live animals	1000 Head		1
BGD	c098	976	Sheep	Live animals	1000 Head		1
BGD	c099	1016	Goats	Live animals	1000 Head		1
BGD	c100	1034	Pigs	Live animals	1000 Head		1
BGD	c101	2029	Poultry Birds	Live animals	1000 Head		1
BGD	c102	1096	Horses	Live animals	1000 Head		1
BGD	c103	1107	Asses	Live animals	1000 Head		1
BGD	c104	1110	Mules	Live animals	1000 Head		1
BGD	c105	1126	Camels	Live animals	1000 Head		1
BGD	c106	1157	Camelids, other	Live animals	1000 Head		1
BGD	c107	1140	Rabbits and hares	Live animals	1000 Head		1
BGD	c108	1150	Rodents, other	Live animals	1000 Head		1
BGD	c112	2746	Wool (Clean Eq.)	Hides, skins, wool	tonnes		1
BGD	c120	2748	Hides and skins	Hides, skins, wool	tonnes		1
BGD	c122	2747	Silk	Hides, skins, wool	tonnes		1
BOL	c001	2807	Rice and products	Cereals	tonnes	2.39183	0.864
BOL	c002	2511	Wheat and products	Cereals	tonnes	2.49154	0.864
BOL	c003	2513	Barley and products	Cereals	tonnes	2.52978	0.894515
BOL	c004	2514	Maize and products	Cereals	tonnes	2.95395	0.864
BOL	c005	2515	Rye and products	Cereals	tonnes	2.39509	0.864
BOL	c006	2516	Oats	Cereals	tonnes	1.67738	0.864
BOL	c007	2517	Millet and products	Cereals	tonnes	2.80841	0.947573
BOL	c008	2518	Sorghum and products	Cereals	tonnes	3.0042	0.926592
BOL	c009	2520	Cereals, Other	Cereals	tonnes	3.54318	0.864
BOL	c010	2531	Potatoes and products	Roots and tubers	tonnes	0.639395	0.94672
BOL	c011	2532	Cassava and products	Roots and tubers	tonnes	1.20866	0.94672
BOL	c013	2534	Roots, Other	Roots and tubers	tonnes	0.847228	0.94672
BOL	c014	2535	Yams	Roots and tubers	tonnes	0.878775	0.926996
BOL	c012	2533	Sweet potatoes	Roots and tubers	tonnes	0.909379	0.94672
BOL	c031	2601	Tomatoes and products	Vegetables, fruit, nuts, pulses, spices	tonnes	0.20329	0.8811
BOL	c032	2602	Onions	Vegetables, fruit, nuts, pulses, spices	tonnes	0.387419	0.8811
BOL	c033	2605	Vegetables, Other	Vegetables, fruit, nuts, pulses, spices	tonnes	0.321954	0.8811
BOL	c049	2640	Pepper	Vegetables, fruit, nuts, pulses, spices	tonnes	2.9242	0.8811
BOL	c050	2641	Pimento	Vegetables, fruit, nuts, pulses, spices	tonnes	3.20593	0.821392
BOL	c051	2642	Cloves	Vegetables, fruit, nuts, pulses, spices	tonnes	2.07481	0.840547
BOL	c052	2645	Spices, Other	Vegetables, fruit, nuts, pulses, spices	tonnes	3.26059	0.8811
BOL	c034	2611	Oranges, Mandarines	Vegetables, fruit, nuts, pulses, spices	tonnes	0.348552	0.8811
BOL	c035	2612	Lemons, Limes and products	Vegetables, fruit, nuts, pulses, spices	tonnes	0.168877	0.8811
BOL	c036	2613	Grapefruit and products	Vegetables, fruit, nuts, pulses, spices	tonnes	0.225147	0.8811
BOL	c037	2614	Citrus, Other	Vegetables, fruit, nuts, pulses, spices	tonnes	1.25563	0.821254
BOL	c038	2615	Bananas	Vegetables, fruit, nuts, pulses, spices	tonnes	0.657426	0.8811
BOL	c039	2616	Plantains	Vegetables, fruit, nuts, pulses, spices	tonnes	0.739035	0.8811
BOL	c040	2617	Apples and products	Vegetables, fruit, nuts, pulses, spices	tonnes	0.51736	0.8811
BOL	c041	2618	Pineapples and products	Vegetables, fruit, nuts, pulses, spices	tonnes	0.292122	0.8811
BOL	c042	2619	Dates	Vegetables, fruit, nuts, pulses, spices	tonnes	1.92952	0.819737
BOL	c043	2620	Grapes and products (excl wine)	Vegetables, fruit, nuts, pulses, spices	tonnes	0.643186	0.8811
BOL	c044	2625	Fruits, Other	Vegetables, fruit, nuts, pulses, spices	tonnes	0.489483	0.8811
BOL	c109	2848	Milk - Excluding Butter	Milk	tonnes	0.737645	0.8832
BOL	c110	2740	Butter, Ghee	Milk	tonnes	5.60703	0.8832
BOL	c113	2731	Bovine Meat	Meat	tonnes	1.79457	0.893
BOL	c114	2732	Mutton & Goat Meat	Meat	tonnes	1.99988	0.893
BOL	c115	2733	Pigmeat	Meat	tonnes	1.58607	0.893
BOL	c017	2546	Beans	Vegetables, fruit, nuts, pulses, spices	tonnes	2.34889	0.9604
BOL	c018	2547	Peas	Vegetables, fruit, nuts, pulses, spices	tonnes	2.96155	0.9604
BOL	c019	2549	Pulses, Other and products	Vegetables, fruit, nuts, pulses, spices	tonnes	3.26794	0.9604
BOL	c020	2551	Nuts and products	Vegetables, fruit, nuts, pulses, spices	tonnes	1.72602	0.9604
BOL	c021	2555	Soyabeans	Oil crops	tonnes	3.83493	0.9604
BOL	c022	2552	Groundnuts	Oil crops	tonnes	3.96894	0.9604
BOL	c023	2557	Sunflower seed	Oil crops	tonnes	4.59893	0.966
BOL	c026	2560	Coconuts - Incl Copra	Oil crops	tonnes	1.51693	0.9604
BOL	c027	2561	Sesame seed	Oil crops	tonnes	6.77607	0.9604
BOL	c030	2570	Oilcrops, Other	Oil crops	tonnes	4.81674	0.966911
BOL	c111	2744	Eggs	Eggs	tonnes	1.26531	0.9216
BOL	c116	2734	Poultry Meat	Meat	tonnes	1.37033	0.893
BOL	c123	2960	Fish, Seafood	Fish	tonnes	0.761118	0.8908
BOL	c074	2577	Palm Oil	Vegetable oils	tonnes	7.73514	0.966922
BOL	c068	2571	Soyabean Oil	Vegetable oils	tonnes	3.55356	0.9604
BOL	c069	2572	Groundnut Oil	Vegetable oils	tonnes	6.45134	0.9604
BOL	c070	2573	Sunflowerseed Oil	Vegetable oils	tonnes	8.67997	0.9604
BOL	c071	2574	Rape and Mustard Oil	Vegetable oils	tonnes	7.11596	0.96529
BOL	c072	2575	Cottonseed Oil	Vegetable oils	tonnes	7.66367	0.9604
BOL	c073	2576	Palmkernel Oil	Vegetable oils	tonnes	8.5399	0.968975
BOL	c075	2578	Coconut Oil	Vegetable oils	tonnes	8.42957	0.965137
BOL	c076	2579	Sesameseed Oil	Vegetable oils	tonnes	8.78419	0.965613
BOL	c077	2580	Olive Oil	Vegetable oils	tonnes	5.85102	0.9604
BOL	c078	2581	Ricebran Oil	Vegetable oils	tonnes	8.3408	0.9702
BOL	c079	2582	Maize Germ Oil	Vegetable oils	tonnes	8.92176	0.9604
BOL	c080	2586	Oilcrops Oil, Other	Vegetable oils	tonnes	7.39671	0.964576
BOL	c119	2737	Fats, Animals, Raw	Animal fats	tonnes	8.34862	0.893
BOL	c015	2536	Sugar cane	Sugar crops	tonnes	0.326086	1
BOL	c016	2537	Sugar beet	Sugar crops	tonnes	0.557477	1
BOL	c065	2541	Sugar non-centrifugal	Sugar, sweeteners	tonnes	3.48406	0.94335
BOL	c066	2542	Sugar (Raw Equivalent)	Sugar, sweeteners	tonnes	1.97802	0.94335
BOL	c067	2543	Sweeteners, Other	Sugar, sweeteners	tonnes	0.352883	0.94335
BOL	c121	2745	Honey	Honey	tonnes	2.16488	0.94335
BOL	c045	2630	Coffee and products	Coffee, tea, cocoa	tonnes	0.376849	1
BOL	c046	2633	Cocoa Beans and products	Coffee, tea, cocoa	tonnes	3.7759	1
BOL	c047	2635	Tea (including mate)	Coffee, tea, cocoa	tonnes	0.0577879	1
BOL	c090	2655	Wine	Alcohol	tonnes	0.847395	1
BOL	c091	2656	Beer	Alcohol	tonnes	0.437528	1
BOL	c092	2657	Beverages, Fermented	Alcohol	tonnes	0.563996	1
BOL	c093	2658	Beverages, Alcoholic	Alcohol	tonnes	2.87399	1
BOL	c117	2735	Meat, Other	Meat	tonnes	1.22883	0.893
BOL	c118	2736	Offals, Edible	Meat	tonnes	1.2115	0.893
BOL	c024	2558	Rape and Mustardseed	Oil crops	tonnes	3.55752	0.951511
BOL	c025	328	Seed cotton	Oil crops	tonnes		1
BOL	c028	254	Oil, palm fruit	Oil crops	tonnes		1
BOL	c029	2563	Olives (including preserved)	Oil crops	tonnes	1.29236	0.9604
BOL	c048	677	Hops	Vegetables, fruit, nuts, pulses, spices	tonnes		1
BOL	c053	2662	Jute	Fibre crops	tonnes		1
BOL	c054	2663	Jute-Like Fibres	Fibre crops	tonnes		1
BOL	c055	2664	Soft-Fibres, Other	Fibre crops	tonnes		1
BOL	c056	2665	Sisal	Fibre crops	tonnes		1
BOL	c057	2666	Abaca	Fibre crops	tonnes		1
BOL	c058	2667	Hard Fibres, Other	Fibre crops	tonnes		1
BOL	c059	2671	Tobacco	Tobacco, rubber	tonnes		1
BOL	c060	2672	Rubber	Tobacco, rubber	tonnes		1
BOL	c061	2000	Fodder crops	Fodder crops	tonnes		1
BOL	c062	2001	Grazing	Grazing	tonnes		1
BOL	c063	2559	Cottonseed	Fibre crops	tonnes	4.90679	1
BOL	c064	2562	Palm kernels	Oil crops	tonnes		1
BOL	c081	2590	Soyabean Cake	Oil cakes	tonnes		1
BOL	c082	2591	Groundnut Cake	Oil cakes	tonnes		1
BOL	c083	2592	Sunflowerseed Cake	Oil cakes	tonnes		1
BOL	c084	2593	Rape and Mustard Cake	Oil cakes	tonnes		1
BOL	c085	2594	Cottonseed Cake	Oil cakes	tonnes		1
BOL	c086	2595	Palmkernel Cake	Oil cakes	tonnes		1
BOL	c087	2596	Copra Cake	Oil cakes	tonnes		1
BOL	c088	2597	Sesameseed Cake	Oil cakes	tonnes		1
BOL	c089	2598	Oilseed Cakes, Other	Oil cakes	tonnes		1
BOL	c094	2659	Alcohol, Non-Food	Ethanol	tonnes		1
BOL	c095	2661	Cotton lint	Fibre crops	tonnes		1
BOL	c096	866	Cattle	Live animals	1000 Head		1
BOL	c097	946	Buffaloes	Live animals	1000 Head		1
BOL	c098	976	Sheep	Live animals	1000 Head		1
BOL	c099	1016	Goats	Live animals	1000 Head		1
BOL	c100	1034	Pigs	Live animals	1000 Head		1
BOL	c101	2029	Poultry Birds	Live animals	1000 Head		1
BOL	c102	1096	Horses	Live animals	1000 Head		1
BOL	c103	1107	Asses	Live animals	1000 Head		1
BOL	c104	1110	Mules	Live animals	1000 Head		1
BOL	c105	1126	Camels	Live animals	1000 Head		1
BOL	c106	1157	Camelids, other	Live animals	1000 Head		1
BOL	c107	1140	Rabbits and hares	Live animals	1000 Head		1
BOL	c108	1150	Rodents, other	Live animals	1000 Head		1
BOL	c112	2746	Wool (Clean Eq.)	Hides, skins, wool	tonnes		1
BOL	c120	2748	Hides and skins	Hides, skins, wool	tonnes		1
BOL	c122	2747	Silk	Hides, skins, wool	tonnes		1
SLB	c001	2807	Rice and products	Cereals	tonnes	2.22603	0.7154
SLB	c002	2511	Wheat and products	Cereals	tonnes	2.06691	0.7154
SLB	c003	2513	Barley and products	Cereals	tonnes	2.52978	0.894515
SLB	c004	2514	Maize and products	Cereals	tonnes	3.00086	0.7154
SLB	c005	2515	Rye and products	Cereals	tonnes	2.39509	0.868233
SLB	c006	2516	Oats	Cereals	tonnes	2.35733	0.912862
SLB	c007	2517	Millet and products	Cereals	tonnes	2.80841	0.947573
SLB	c008	2518	Sorghum and products	Cereals	tonnes	3.0042	0.926592
SLB	c009	2520	Cereals, Other	Cereals	tonnes	2.40974	0.903639
SLB	c010	2531	Potatoes and products	Roots and tubers	tonnes	0.635442	0.798898
SLB	c011	2532	Cassava and products	Roots and tubers	tonnes	1.19394	0.798898
SLB	c013	2534	Roots, Other	Roots and tubers	tonnes	0.839831	0.798898
SLB	c014	2535	Yams	Roots and tubers	tonnes	0.893211	0.798898
SLB	c012	2533	Sweet potatoes	Roots and tubers	tonnes	0.971022	0.798898
SLB	c031	2601	Tomatoes and products	Vegetables, fruit, nuts, pulses, spices	tonnes	0.186254	0.78264
SLB	c032	2602	Onions	Vegetables, fruit, nuts, pulses, spices	tonnes	0.385572	0.78264
SLB	c033	2605	Vegetables, Other	Vegetables, fruit, nuts, pulses, spices	tonnes	0.379684	0.78264
SLB	c049	2640	Pepper	Vegetables, fruit, nuts, pulses, spices	tonnes	2.9242	0.824316
SLB	c050	2641	Pimento	Vegetables, fruit, nuts, pulses, spices	tonnes	3.20593	0.821392
SLB	c051	2642	Cloves	Vegetables, fruit, nuts, pulses, spices	tonnes	2.07481	0.840547
SLB	c052	2645	Spices, Other	Vegetables, fruit, nuts, pulses, spices	tonnes	2.66959	0.78264
SLB	c034	2611	Oranges, Mandarines	Vegetables, fruit, nuts, pulses, spices	tonnes	0.299697	0.78264
SLB	c035	2612	Lemons, Limes and products	Vegetables, fruit, nuts, pulses, spices	tonnes	0.244313	0.830742
SLB	c036	2613	Grapefruit and products	Vegetables, fruit, nuts, pulses, spices	tonnes	0.171836	0.8276
SLB	c037	2614	Citrus, Other	Vegetables, fruit, nuts, pulses, spices	tonnes	0.554778	0.78264
SLB	c038	2615	Bananas	Vegetables, fruit, nuts, pulses, spices	tonnes	0.652453	0.78264
SLB	c039	2616	Plantains	Vegetables, fruit, nuts, pulses, spices	tonnes	0.736155	0.82674
SLB	c040	2617	Apples and products	Vegetables, fruit, nuts, pulses, spices	tonnes	0.449005	0.78264
SLB	c041	2618	Pineapples and products	Vegetables, fruit, nuts, pulses, spices	tonnes	0.261581	0.78264
SLB	c042	2619	Dates	Vegetables, fruit, nuts, pulses, spices	tonnes	1.92952	0.819737
SLB	c043	2620	Grapes and products (excl wine)	Vegetables, fruit, nuts, pulses, spices	tonnes	0.653528	0.78264
SLB	c044	2625	Fruits, Other	Vegetables, fruit, nuts, pulses, spices	tonnes	0.43291	0.78264
SLB	c109	2848	Milk - Excluding Butter	Milk	tonnes	1.69744	0.84575
SLB	c110	2740	Butter, Ghee	Milk	tonnes	7.97306	0.84575
SLB	c113	2731	Bovine Meat	Meat	tonnes	2.45507	0.8544
SLB	c114	2732	Mutton & Goat Meat	Meat	tonnes	1.83892	0.8544
SLB	c115	2733	Pigmeat	Meat	tonnes	2.09304	0.8544
SLB	c017	2546	Beans	Vegetables, fruit, nuts, pulses, spices	tonnes	3.02542	0.967015
SLB	c018	2547	Peas	Vegetables, fruit, nuts, pulses, spices	tonnes	3.1961	0.965547
SLB	c019	2549	Pulses, Other and products	Vegetables, fruit, nuts, pulses, spices	tonnes	3.20254	0.9504
SLB	c020	2551	Nuts and products	Vegetables, fruit, nuts, pulses, spices	tonnes	2.05709	0.9504
SLB	c021	2555	Soyabeans	Oil crops	tonnes	3.10346	0.9504
SLB	c022	2552	Groundnuts	Oil crops	tonnes	3.7968	0.9504
SLB	c023	2557	Sunflower seed	Oil crops	tonnes	4.59893	0.966
SLB	c026	2560	Coconuts - Incl Copra	Oil crops	tonnes	0.842965	0.9504
SLB	c027	2561	Sesame seed	Oil crops	tonnes	5.80189	0.9504
SLB	c030	2570	Oilcrops, Other	Oil crops	tonnes	4.81674	0.966911
SLB	c111	2744	Eggs	Eggs	tonnes	0.707891	0.833
SLB	c116	2734	Poultry Meat	Meat	tonnes	1.62995	0.8544
SLB	c123	2960	Fish, Seafood	Fish	tonnes	0.763588	0.845188
SLB	c074	2577	Palm Oil	Vegetable oils	tonnes	9.316	0.9504
SLB	c068	2571	Soyabean Oil	Vegetable oils	tonnes	6.78534	0.966493
SLB	c069	2572	Groundnut Oil	Vegetable oils	tonnes	8.86271	0.967109
SLB	c070	2573	Sunflowerseed Oil	Vegetable oils	tonnes	8.67997	0.965923
SLB	c071	2574	Rape and Mustard Oil	Vegetable oils	tonnes	7.11596	0.96529
SLB	c072	2575	Cottonseed Oil	Vegetable oils	tonnes	7.32827	0.96705
SLB	c073	2576	Palmkernel Oil	Vegetable oils	tonnes	8.5399	0.968975
SLB	c075	2578	Coconut Oil	Vegetable oils	tonnes	4.87797	0.9504
SLB	c076	2579	Sesameseed Oil	Vegetable oils	tonnes	8.78419	0.965613
SLB	c077	2580	Olive Oil	Vegetable oils	tonnes	8.89481	0.9504
SLB	c078	2581	Ricebran Oil	Vegetable oils	tonnes	8.3408	0.9702
SLB	c079	2582	Maize Germ Oil	Vegetable oils	tonnes	8.92176	0.963509
SLB	c080	2586	Oilcrops Oil, Other	Vegetable oils	tonnes	7.57272	0.9504
SLB	c119	2737	Fats, Animals, Raw	Animal fats	tonnes	6.89214	0.8544
SLB	c015	2536	Sugar cane	Sugar crops	tonnes	0.326086	1
SLB	c016	2537	Sugar beet	Sugar crops	tonnes	0.557477	1
SLB	c065	2541	Sugar non-centrifugal	Sugar, sweeteners	tonnes	3.48406	0.94335
SLB	c066	2542	Sugar (Raw Equivalent)	Sugar, sweeteners	tonnes	3.58041	0.94335
SLB	c067	2543	Sweeteners, Other	Sugar, sweeteners	tonnes	0.442459	0.94335
SLB	c121	2745	Honey	Honey	tonnes	3.08763	0.94335
SLB	c045	2630	Coffee and products	Coffee, tea, cocoa	tonnes	0.316874	1
SLB	c046	2633	Cocoa Beans and products	Coffee, tea, cocoa	tonnes	3.77874	1
SLB	c047	2635	Tea (including mate)	Coffee, tea, cocoa	tonnes	0.0311573	1
SLB	c090	2655	Wine	Alcohol	tonnes	0.782909	1
SLB	c091	2656	Beer	Alcohol	tonnes	0.42445	1
SLB	c092	2657	Beverages, Fermented	Alcohol	tonnes	0.355754	1
SLB	c093	2658	Beverages, Alcoholic	Alcohol	tonnes	2.81854	1
SLB	c117	2735	Meat, Other	Meat	tonnes	1.33285	0.893105
SLB	c118	2736	Offals, Edible	Meat	tonnes	1.23975	0.8544
SLB	c024	2558	Rape and Mustardseed	Oil crops	tonnes	2.02361	0.951511
SLB	c025	328	Seed cotton	Oil crops	tonnes		1
SLB	c028	254	Oil, palm fruit	Oil crops	tonnes		1
SLB	c029	2563	Olives (including preserved)	Oil crops	tonnes	1.29236	0.96352
SLB	c048	677	Hops	Vegetables, fruit, nuts, pulses, spices	tonnes		1
SLB	c053	2662	Jute	Fibre crops	tonnes		1
SLB	c054	2663	Jute-Like Fibres	Fibre crops	tonnes		1
SLB	c055	2664	Soft-Fibres, Other	Fibre crops	tonnes		1
SLB	c056	2665	Sisal	Fibre crops	tonnes		1
SLB	c057	2666	Abaca	Fibre crops	tonnes		1
SLB	c058	2667	Hard Fibres, Other	Fibre crops	tonnes		1
SLB	c059	2671	Tobacco	Tobacco, rubber	tonnes		1
SLB	c060	2672	Rubber	Tobacco, rubber	tonnes		1
SLB	c061	2000	Fodder crops	Fodder crops	tonnes		1
SLB	c062	2001	Grazing	Grazing	tonnes		1
SLB	c063	2559	Cottonseed	Fibre crops	tonnes	4.90679	1
SLB	c064	2562	Palm kernels	Oil crops	tonnes		1
SLB	c081	2590	Soyabean Cake	Oil cakes	tonnes		1
SLB	c082	2591	Groundnut Cake	Oil cakes	tonnes		1
SLB	c083	2592	Sunflowerseed Cake	Oil cakes	tonnes		1
SLB	c084	2593	Rape and Mustard Cake	Oil cakes	tonnes		1
SLB	c085	2594	Cottonseed Cake	Oil cakes	tonnes		1
SLB	c086	2595	Palmkernel Cake	Oil cakes	tonnes		1
SLB	c087	2596	Copra Cake	Oil cakes	tonnes		1
SLB	c088	2597	Sesameseed Cake	Oil cakes	tonnes		1
SLB	c089	2598	Oilseed Cakes, Other	Oil cakes	tonnes		1
SLB	c094	2659	Alcohol, Non-Food	Ethanol	tonnes		1
SLB	c095	2661	Cotton lint	Fibre crops	tonnes		1
SLB	c096	866	Cattle	Live animals	1000 Head		1
SLB	c097	946	Buffaloes	Live animals	1000 Head		1
SLB	c098	976	Sheep	Live animals	1000 Head		1
SLB	c099	1016	Goats	Live animals	1000 Head		1
SLB	c100	1034	Pigs	Live animals	1000 Head		1
SLB	c101	2029	Poultry Birds	Live animals	1000 Head		1
SLB	c102	1096	Horses	Live animals	1000 Head		1
SLB	c103	1107	Asses	Live animals	1000 Head		1
SLB	c104	1110	Mules	Live animals	1000 Head		1
SLB	c105	1126	Camels	Live animals	1000 Head		1
SLB	c106	1157	Camelids, other	Live animals	1000 Head		1
SLB	c107	1140	Rabbits and hares	Live animals	1000 Head		1
SLB	c108	1150	Rodents, other	Live animals	1000 Head		1
SLB	c112	2746	Wool (Clean Eq.)	Hides, skins, wool	tonnes		1
SLB	c120	2748	Hides and skins	Hides, skins, wool	tonnes		1
SLB	c122	2747	Silk	Hides, skins, wool	tonnes		1
MMR	c001	2807	Rice and products	Cereals	tonnes	2.19003	0.9506
MMR	c002	2511	Wheat and products	Cereals	tonnes	2.48609	0.9506
MMR	c003	2513	Barley and products	Cereals	tonnes	2.1371	0.894515
MMR	c004	2514	Maize and products	Cereals	tonnes	3.16166	0.9506
MMR	c005	2515	Rye and products	Cereals	tonnes	2.39509	0.868233
MMR	c006	2516	Oats	Cereals	tonnes	2.35733	0.912862
MMR	c007	2517	Millet and products	Cereals	tonnes	3.25423	0.9506
MMR	c008	2518	Sorghum and products	Cereals	tonnes	3.42113	0.9506
MMR	c009	2520	Cereals, Other	Cereals	tonnes	3.67193	0.9506
MMR	c010	2531	Potatoes and products	Roots and tubers	tonnes	0.633958	0.86437
MMR	c011	2532	Cassava and products	Roots and tubers	tonnes	1.21317	0.86437
MMR	c013	2534	Roots, Other	Roots and tubers	tonnes	0.835499	0.912752
MMR	c014	2535	Yams	Roots and tubers	tonnes	0.878775	0.926996
MMR	c012	2533	Sweet potatoes	Roots and tubers	tonnes	0.97141	0.86437
MMR	c031	2601	Tomatoes and products	Vegetables, fruit, nuts, pulses, spices	tonnes	0.194574	0.821011
MMR	c032	2602	Onions	Vegetables, fruit, nuts, pulses, spices	tonnes	0.389766	0.8397
MMR	c033	2605	Vegetables, Other	Vegetables, fruit, nuts, pulses, spices	tonnes	0.309234	0.8397
MMR	c049	2640	Pepper	Vegetables, fruit, nuts, pulses, spices	tonnes	2.9242	0.824316
MMR	c050	2641	Pimento	Vegetables, fruit, nuts, pulses, spices	tonnes	3.18119	0.8397
MMR	c051	2642	Cloves	Vegetables, fruit, nuts, pulses, spices	tonnes	2.07481	0.840547
MMR	c052	2645	Spices, Other	Vegetables, fruit, nuts, pulses, spices	tonnes	3.40164	0.8397
MMR	c034	2611	Oranges, Mandarines	Vegetables, fruit, nuts, pulses, spices	tonnes	0.333439	0.822798
MMR	c035	2612	Lemons, Limes and products	Vegetables, fruit, nuts, pulses, spices	tonnes	0.291496	0.830742
MMR	c036	2613	Grapefruit and products	Vegetables, fruit, nuts, pulses, spices	tonnes	0.171836	0.8276
MMR	c037	2614	Citrus, Other	Vegetables, fruit, nuts, pulses, spices	tonnes	0.554778	0.821254
MMR	c038	2615	Bananas	Vegetables, fruit, nuts, pulses, spices	tonnes	0.652453	0.821068
MMR	c039	2616	Plantains	Vegetables, fruit, nuts, pulses, spices	tonnes	0.740672	0.8397
MMR	c040	2617	Apples and products	Vegetables, fruit, nuts, pulses, spices	tonnes	0.521053	0.8397
MMR	c041	2618	Pineapples and products	Vegetables, fruit, nuts, pulses, spices	tonnes	0.324128	0.821479
MMR	c042	2619	Dates	Vegetables, fruit, nuts, pulses, spices	tonnes	1.92952	0.819737
MMR	c043	2620	Grapes and products (excl wine)	Vegetables, fruit, nuts, pulses, spices	tonnes	0.712962	0.823293
MMR	c044	2625	Fruits, Other	Vegetables, fruit, nuts, pulses, spices	tonnes	0.438809	0.8397
MMR	c109	2848	Milk - Excluding Butter	Milk	tonnes	0.558094	0.891
MMR	c110	2740	Butter, Ghee	Milk	tonnes	7.22934	0.891
MMR	c113	2731	Bovine Meat	Meat	tonnes	1.84498	0.8928
MMR	c114	2732	Mutton & Goat Meat	Meat	tonnes	1.41296	0.8928
MMR	c115	2733	Pigmeat	Meat	tonnes	2.35233	0.8928
MMR	c017	2546	Beans	Vegetables, fruit, nuts, pulses, spices	tonnes	3.14501	0.9702
MMR	c018	2547	Peas	Vegetables, fruit, nuts, pulses, spices	tonnes	3.18851	0.9702
MMR	c019	2549	Pulses, Other and products	Vegetables, fruit, nuts, pulses, spices	tonnes	3.26737	0.9702
MMR	c020	2551	Nuts and products	Vegetables, fruit, nuts, pulses, spices	tonnes	0.00296614	0.9702
MMR	c021	2555	Soyabeans	Oil crops	tonnes	4.51265	0.9702
MMR	c022	2552	Groundnuts	Oil crops	tonnes	4.09152	0.9702
MMR	c023	2557	Sunflower seed	Oil crops	tonnes	4.70925	0.9702
MMR	c026	2560	Coconuts - Incl Copra	Oil crops	tonnes	0.844851	0.9702
MMR	c027	2561	Sesame seed	Oil crops	tonnes	5.8275	0.9702
MMR	c030	2570	Oilcrops, Other	Oil crops	tonnes	4.81674	0.966911
MMR	c111	2744	Eggs	Eggs	tonnes	1.3251	0.9506
MMR	c116	2734	Poultry Meat	Meat	tonnes	1.4208	0.8928
MMR	c123	2960	Fish, Seafood	Fish	tonnes	0.791503	0.8562
MMR	c074	2577	Palm Oil	Vegetable oils	tonnes	8.86616	0.9702
MMR	c068	2571	Soyabean Oil	Vegetable oils	tonnes	9.16517	0.9702
MMR	c069	2572	Groundnut Oil	Vegetable oils	tonnes	8.96114	0.9702
MMR	c070	2573	Sunflowerseed Oil	Vegetable oils	tonnes	9.0438	0.9702
MMR	c071	2574	Rape and Mustard Oil	Vegetable oils	tonnes	7.11596	0.96529
MMR	c072	2575	Cottonseed Oil	Vegetable oils	tonnes	8.79126	0.9702
MMR	c073	2576	Palmkernel Oil	Vegetable oils	tonnes	9.45821	0.9702
MMR	c075	2578	Coconut Oil	Vegetable oils	tonnes	8.42957	0.965137
MMR	c076	2579	Sesameseed Oil	Vegetable oils	tonnes	9.06479	0.9702
MMR	c077	2580	Olive Oil	Vegetable oils	tonnes	8.89481	0.965035
MMR	c078	2581	Ricebran Oil	Vegetable oils	tonnes	8.3408	0.9702
MMR	c079	2582	Maize Germ Oil	Vegetable oils	tonnes	6.41131	0.963509
MMR	c080	2586	Oilcrops Oil, Other	Vegetable oils	tonnes	5.92709	0.964576
MMR	c119	2737	Fats, Animals, Raw	Animal fats	tonnes	6.67035	0.8928
MMR	c015	2536	Sugar cane	Sugar crops	tonnes	0.326086	1
MMR	c016	2537	Sugar beet	Sugar crops	tonnes	0.557477	1
MMR	c065	2541	Sugar non-centrifugal	Sugar, sweeteners	tonnes	3.80433	0.94335
MMR	c066	2542	Sugar (Raw Equivalent)	Sugar, sweeteners	tonnes	3.65197	0.94335
MMR	c067	2543	Sweeteners, Other	Sugar, sweeteners	tonnes	0.367786	0.94335
MMR	c121	2745	Honey	Honey	tonnes	3.08763	0.94335
MMR	c045	2630	Coffee and products	Coffee, tea, cocoa	tonnes	0.980308	1
MMR	c046	2633	Cocoa Beans and products	Coffee, tea, cocoa	tonnes	7.76352	1
MMR	c047	2635	Tea (including mate)	Coffee, tea, cocoa	tonnes	0.0496352	1
MMR	c090	2655	Wine	Alcohol	tonnes	0.712605	1
MMR	c091	2656	Beer	Alcohol	tonnes	0.439916	1
MMR	c092	2657	Beverages, Fermented	Alcohol	tonnes	0.355754	1
MMR	c093	2658	Beverages, Alcoholic	Alcohol	tonnes	2.7666	1
MMR	c117	2735	Meat, Other	Meat	tonnes	1.33285	0.893105
MMR	c118	2736	Offals, Edible	Meat	tonnes	1.3293	0.8928
MMR	c024	2558	Rape and Mustardseed	Oil crops	tonnes	2.33372	0.951511
MMR	c025	328	Seed cotton	Oil crops	tonnes		1
MMR	c028	254	Oil, palm fruit	Oil crops	tonnes		1
MMR	c029	2563	Olives (including preserved)	Oil crops	tonnes	1.29236	0.96352
MMR	c048	677	Hops	Vegetables, fruit, nuts, pulses, spices	tonnes		1
MMR	c053	2662	Jute	Fibre crops	tonnes		1
MMR	c054	2663	Jute-Like Fibres	Fibre crops	tonnes		1
MMR	c055	2664	Soft-Fibres, Other	Fibre crops	tonnes		1
MMR	c056	2665	Sisal	Fibre crops	tonnes		1
MMR	c057	2666	Abaca	Fibre crops	tonnes		1
MMR	c058	2667	Hard Fibres, Other	Fibre crops	tonnes		1
MMR	c059	2671	Tobacco	Tobacco, rubber	tonnes		1
MMR	c060	2672	Rubber	Tobacco, rubber	tonnes		1
MMR	c061	2000	Fodder crops	Fodder crops	tonnes		1
MMR	c062	2001	Grazing	Grazing	tonnes		1
MMR	c063	2559	Cottonseed	Fibre crops	tonnes	4.90679	1
MMR	c064	2562	Palm kernels	Oil crops	tonnes		1
MMR	c081	2590	Soyabean Cake	Oil cakes	tonnes		1
MMR	c082	2591	Groundnut Cake	Oil cakes	tonnes		1
MMR	c083	2592	Sunflowerseed Cake	Oil cakes	tonnes		1
MMR	c084	2593	Rape and Mustard Cake	Oil cakes	tonnes		1
MMR	c085	2594	Cottonseed Cake	Oil cakes	tonnes		1
MMR	c086	2595	Palmkernel Cake	Oil cakes	tonnes		1
MMR	c087	2596	Copra Cake	Oil cakes	tonnes		1
MMR	c088	2597	Sesameseed Cake	Oil cakes	tonnes		1
MMR	c089	2598	Oilseed Cakes, Other	Oil cakes	tonnes		1
MMR	c094	2659	Alcohol, Non-Food	Ethanol	tonnes		1
MMR	c095	2661	Cotton lint	Fibre crops	tonnes		1
MMR	c096	866	Cattle	Live animals	1000 Head		1
MMR	c097	946	Buffaloes	Live animals	1000 Head		1
MMR	c098	976	Sheep	Live animals	1000 Head		1
MMR	c099	1016	Goats	Live animals	1000 Head		1
MMR	c100	1034	Pigs	Live animals	1000 Head		1
MMR	c101	2029	Poultry Birds	Live animals	1000 Head		1
MMR	c102	1096	Horses	Live animals	1000 Head		1
MMR	c103	1107	Asses	Live animals	1000 Head		1
MMR	c104	1110	Mules	Live animals	1000 Head		1
MMR	c105	1126	Camels	Live animals	1000 Head		1
MMR	c106	1157	Camelids, other	Live animals	1000 Head		1
MMR	c107	1140	Rabbits and hares	Live animals	1000 Head		1
MMR	c108	1150	Rodents, other	Live animals	1000 Head		1
MMR	c112	2746	Wool (Clean Eq.)	Hides, skins, wool	tonnes		1
MMR	c120	2748	Hides and skins	Hides, skins, wool	tonnes		1
MMR	c122	2747	Silk	Hides, skins, wool	tonnes		1
CMR	c001	2807	Rice and products	Cereals	tonnes	2.30644	0.9702
CMR	c002	2511	Wheat and products	Cereals	tonnes	2.57402	0.9702
CMR	c003	2513	Barley and products	Cereals	tonnes	3.63248	0.9702
CMR	c004	2514	Maize and products	Cereals	tonnes	2.75561	0.9702
CMR	c005	2515	Rye and products	Cereals	tonnes	2.39509	0.868233
CMR	c006	2516	Oats	Cereals	tonnes	2.35733	0.912862
CMR	c007	2517	Millet and products	Cereals	tonnes	3.13087	0.9702
CMR	c008	2518	Sorghum and products	Cereals	tonnes	3.03105	0.9702
CMR	c009	2520	Cereals, Other	Cereals	tonnes	2.70233	0.903639
CMR	c010	2531	Potatoes and products	Roots and tubers	tonnes	0.633912	0.9506
CMR	c011	2532	Cassava and products	Roots and tubers	tonnes	1.18244	0.9506
CMR	c013	2534	Roots, Other	Roots and tubers	tonnes	0.756027	0.9506
CMR	c014	2535	Yams	Roots and tubers	tonnes	0.8784	0.9506
CMR	c012	2533	Sweet potatoes	Roots and tubers	tonnes	0.965554	0.9506
CMR	c031	2601	Tomatoes and products	Vegetables, fruit, nuts, pulses, spices	tonnes	0.201011	0.789525
CMR	c032	2602	Onions	Vegetables, fruit, nuts, pulses, spices	tonnes	0.385621	0.789525
CMR	c033	2605	Vegetables, Other	Vegetables, fruit, nuts, pulses, spices	tonnes	0.232423	0.789525
CMR	c049	2640	Pepper	Vegetables, fruit, nuts, pulses, spices	tonnes	2.9242	0.789525
CMR	c050	2641	Pimento	Vegetables, fruit, nuts, pulses, spices	tonnes	3.20361	0.789525
CMR	c051	2642	Cloves	Vegetables, fruit, nuts, pulses, spices	tonnes	2.07481	0.840547
CMR	c052	2645	Spices, Other	Vegetables, fruit, nuts, pulses, spices	tonnes	1.58471	0.789525
CMR	c034	2611	Oranges, Mandarines	Vegetables, fruit, nuts, pulses, spices	tonnes	0.286775	0.789525
CMR	c035	2612	Lemons, Limes and products	Vegetables, fruit, nuts, pulses, spices	tonnes	0.244313	0.830742
CMR	c036	2613	Grapefruit and products	Vegetables, fruit, nuts, pulses, spices	tonnes	0.171836	0.789531
CMR	c037	2614	Citrus, Other	Vegetables, fruit, nuts, pulses, spices	tonnes	0.554778	0.821254
CMR	c038	2615	Bananas	Vegetables, fruit, nuts, pulses, spices	tonnes	0.650328	0.789525
CMR	c039	2616	Plantains	Vegetables, fruit, nuts, pulses, spices	tonnes	0.727313	0.789525
CMR	c040	2617	Apples and products	Vegetables, fruit, nuts, pulses, spices	tonnes	0.513098	0.789525
CMR	c041	2618	Pineapples and products	Vegetables, fruit, nuts, pulses, spices	tonnes	0.290677	0.789525
CMR	c042	2619	Dates	Vegetables, fruit, nuts, pulses, spices	tonnes	1.24021	0.789525
CMR	c043	2620	Grapes and products (excl wine)	Vegetables, fruit, nuts, pulses, spices	tonnes	0.438842	0.789529
CMR	c044	2625	Fruits, Other	Vegetables, fruit, nuts, pulses, spices	tonnes	0.663568	0.789525
CMR	c109	2848	Milk - Excluding Butter	Milk	tonnes	1.08955	0.8991
CMR	c110	2740	Butter, Ghee	Milk	tonnes	7.97306	0.8991
CMR	c113	2731	Bovine Meat	Meat	tonnes	2.02323	0.9114
CMR	c114	2732	Mutton & Goat Meat	Meat	tonnes	1.5974	0.9114
CMR	c115	2733	Pigmeat	Meat	tonnes	2.36788	0.9114
CMR	c017	2546	Beans	Vegetables, fruit, nuts, pulses, spices	tonnes	3.12073	0.9702
CMR	c018	2547	Peas	Vegetables, fruit, nuts, pulses, spices	tonnes	3.18055	0.9702
CMR	c019	2549	Pulses, Other and products	Vegetables, fruit, nuts, pulses, spices	tonnes	3.19848	0.9702
CMR	c020	2551	Nuts and products	Vegetables, fruit, nuts, pulses, spices	tonnes	0.0678404	0.9702
CMR	c021	2555	Soyabeans	Oil crops	tonnes	3.10346	0.9702
CMR	c022	2552	Groundnuts	Oil crops	tonnes	3.87737	0.9702
CMR	c023	2557	Sunflower seed	Oil crops	tonnes	4.59893	0.966
CMR	c026	2560	Coconuts - Incl Copra	Oil crops	tonnes	0.879414	0.964897
CMR	c027	2561	Sesame seed	Oil crops	tonnes	5.70379	0.9702
CMR	c030	2570	Oilcrops, Other	Oil crops	tonnes	4.45387	0.9702
CMR	c111	2744	Eggs	Eggs	tonnes	1.2439	0.9603
CMR	c116	2734	Poultry Meat	Meat	tonnes	1.37317	0.9114
CMR	c123	2960	Fish, Seafood	Fish	tonnes	0.6596	0.8562
CMR	c074	2577	Palm Oil	Vegetable oils	tonnes	8.84564	0.9702
CMR	c068	2571	Soyabean Oil	Vegetable oils	tonnes	8.69267	0.9702
CMR	c069	2572	Groundnut Oil	Vegetable oils	tonnes	8.90894	0.9702
CMR	c070	2573	Sunflowerseed Oil	Vegetable oils	tonnes	8.67997	0.9702
CMR	c071	2574	Rape and Mustard Oil	Vegetable oils	tonnes	7.11596	0.96529
CMR	c072	2575	Cottonseed Oil	Vegetable oils	tonnes	8.78552	0.9702
CMR	c073	2576	Palmkernel Oil	Vegetable oils	tonnes	9.21569	0.9702
CMR	c075	2578	Coconut Oil	Vegetable oils	tonnes	4.86543	0.9702
CMR	c076	2579	Sesameseed Oil	Vegetable oils	tonnes	8.78419	0.965613
CMR	c077	2580	Olive Oil	Vegetable oils	tonnes	8.89481	0.9702
CMR	c078	2581	Ricebran Oil	Vegetable oils	tonnes	8.3408	0.9702
CMR	c079	2582	Maize Germ Oil	Vegetable oils	tonnes	8.92176	0.963509
CMR	c080	2586	Oilcrops Oil, Other	Vegetable oils	tonnes	8.67422	0.9702
CMR	c119	2737	Fats, Animals, Raw	Animal fats	tonnes	7.14243	0.9114
CMR	c015	2536	Sugar cane	Sugar crops	tonnes	0.325141	1
CMR	c016	2537	Sugar beet	Sugar crops	tonnes	0.557477	1
CMR	c065	2541	Sugar non-centrifugal	Sugar, sweeteners	tonnes	3.48406	0.94335
CMR	c066	2542	Sugar (Raw Equivalent)	Sugar, sweeteners	tonnes	3.61776	0.94335
CMR	c067	2543	Sweeteners, Other	Sugar, sweeteners	tonnes	1.33081	0.94335
CMR	c121	2745	Honey	Honey	tonnes	3.57752	0.94335
CMR	c045	2630	Coffee and products	Coffee, tea, cocoa	tonnes	0.381526	1
CMR	c046	2633	Cocoa Beans and products	Coffee, tea, cocoa	tonnes	3.98193	1
CMR	c047	2635	Tea (including mate)	Coffee, tea, cocoa	tonnes	0.0336747	1
CMR	c090	2655	Wine	Alcohol	tonnes	0.763289	1
CMR	c091	2656	Beer	Alcohol	tonnes	0.439546	1
CMR	c092	2657	Beverages, Fermented	Alcohol	tonnes	0.411139	1
CMR	c093	2658	Beverages, Alcoholic	Alcohol	tonnes	2.75868	1
CMR	c117	2735	Meat, Other	Meat	tonnes	1.38517	0.9114
CMR	c118	2736	Offals, Edible	Meat	tonnes	1.22725	0.9114
CMR	c024	2558	Rape and Mustardseed	Oil crops	tonnes	2.02361	0.951511
CMR	c025	328	Seed cotton	Oil crops	tonnes		1
CMR	c028	254	Oil, palm fruit	Oil crops	tonnes		1
CMR	c029	2563	Olives (including preserved)	Oil crops	tonnes	1.29236	0.9702
CMR	c048	677	Hops	Vegetables, fruit, nuts, pulses, spices	tonnes		1
CMR	c053	2662	Jute	Fibre crops	tonnes		1
CMR	c054	2663	Jute-Like Fibres	Fibre crops	tonnes		1
CMR	c055	2664	Soft-Fibres, Other	Fibre crops	tonnes		1
CMR	c056	2665	Sisal	Fibre crops	tonnes		1
CMR	c057	2666	Abaca	Fibre crops	tonnes		1
CMR	c058	2667	Hard Fibres, Other	Fibre crops	tonnes		1
CMR	c059	2671	Tobacco	Tobacco, rubber	tonnes		1
CMR	c060	2672	Rubber	Tobacco, rubber	tonnes		1
CMR	c061	2000	Fodder crops	Fodder crops	tonnes		1
CMR	c062	2001	Grazing	Grazing	tonnes		1
CMR	c063	2559	Cottonseed	Fibre crops	tonnes	4.90679	1
CMR	c064	2562	Palm kernels	Oil crops	tonnes		1
CMR	c081	2590	Soyabean Cake	Oil cakes	tonnes		1
CMR	c082	2591	Groundnut Cake	Oil cakes	tonnes		1
CMR	c083	2592	Sunflowerseed Cake	Oil cakes	tonnes		1
CMR	c084	2593	Rape and Mustard Cake	Oil cakes	tonnes		1
CMR	c085	2594	Cottonseed Cake	Oil cakes	tonnes		1
CMR	c086	2595	Palmkernel Cake	Oil cakes	tonnes		1
CMR	c087	2596	Copra Cake	Oil cakes	tonnes		1
CMR	c088	2597	Sesameseed Cake	Oil cakes	tonnes		1
CMR	c089	2598	Oilseed Cakes, Other	Oil cakes	tonnes		1
CMR	c094	2659	Alcohol, Non-Food	Ethanol	tonnes		1
CMR	c095	2661	Cotton lint	Fibre crops	tonnes		1
CMR	c096	866	Cattle	Live animals	1000 Head		1
CMR	c097	946	Buffaloes	Live animals	1000 Head		1
CMR	c098	976	Sheep	Live animals	1000 Head		1
CMR	c099	1016	Goats	Live animals	1000 Head		1
CMR	c100	1034	Pigs	Live animals	1000 Head		1
CMR	c101	2029	Poultry Birds	Live animals	1000 Head		1
CMR	c102	1096	Horses	Live animals	1000 Head		1
CMR	c103	1107	Asses	Live animals	1000 Head		1
CMR	c104	1110	Mules	Live animals	1000 Head		1
CMR	c105	1126	Camels	Live animals	1000 Head		1
CMR	c106	1157	Camelids, other	Live animals	1000 Head		1
CMR	c107	1140	Rabbits and hares	Live animals	1000 Head		1
CMR	c108	1150	Rodents, other	Live animals	1000 Head		1
CMR	c112	2746	Wool (Clean Eq.)	Hides, skins, wool	tonnes		1
CMR	c120	2748	Hides and skins	Hides, skins, wool	tonnes		1
CMR	c122	2747	Silk	Hides, skins, wool	tonnes		1
CPV	c001	2807	Rice and products	Cereals	tonnes	2.31548	0.9702
CPV	c002	2511	Wheat and products	Cereals	tonnes	2.52344	0.9702
CPV	c003	2513	Barley and products	Cereals	tonnes	2.16766	0.894515
CPV	c004	2514	Maize and products	Cereals	tonnes	3.15281	0.9702
CPV	c005	2515	Rye and products	Cereals	tonnes	2.39509	0.868233
CPV	c006	2516	Oats	Cereals	tonnes	2.35733	0.9702
CPV	c007	2517	Millet and products	Cereals	tonnes	2.80841	0.947573
CPV	c008	2518	Sorghum and products	Cereals	tonnes	3.0042	0.926592
CPV	c009	2520	Cereals, Other	Cereals	tonnes	2.94182	0.9702
CPV	c010	2531	Potatoes and products	Roots and tubers	tonnes	0.58587	0.9506
CPV	c011	2532	Cassava and products	Roots and tubers	tonnes	1.41188	0.9506
CPV	c013	2534	Roots, Other	Roots and tubers	tonnes	0.835499	0.9506
CPV	c014	2535	Yams	Roots and tubers	tonnes	0.878775	0.926996
CPV	c012	2533	Sweet potatoes	Roots and tubers	tonnes	0.971591	0.9506
CPV	c031	2601	Tomatoes and products	Vegetables, fruit, nuts, pulses, spices	tonnes	0.163624	0.789525
CPV	c032	2602	Onions	Vegetables, fruit, nuts, pulses, spices	tonnes	0.396803	0.789525
CPV	c033	2605	Vegetables, Other	Vegetables, fruit, nuts, pulses, spices	tonnes	0.303488	0.789525
CPV	c049	2640	Pepper	Vegetables, fruit, nuts, pulses, spices	tonnes	2.9242	0.789525
CPV	c050	2641	Pimento	Vegetables, fruit, nuts, pulses, spices	tonnes	4.62934	0.789525
CPV	c051	2642	Cloves	Vegetables, fruit, nuts, pulses, spices	tonnes	2.07481	0.840547
CPV	c052	2645	Spices, Other	Vegetables, fruit, nuts, pulses, spices	tonnes	2.66959	0.789525
CPV	c034	2611	Oranges, Mandarines	Vegetables, fruit, nuts, pulses, spices	tonnes	0.200638	0.789525
CPV	c035	2612	Lemons, Limes and products	Vegetables, fruit, nuts, pulses, spices	tonnes	0.163317	0.789525
CPV	c036	2613	Grapefruit and products	Vegetables, fruit, nuts, pulses, spices	tonnes	0.171836	0.789525
CPV	c037	2614	Citrus, Other	Vegetables, fruit, nuts, pulses, spices	tonnes	0.554778	0.789525
CPV	c038	2615	Bananas	Vegetables, fruit, nuts, pulses, spices	tonnes	0.667625	0.789525
CPV	c039	2616	Plantains	Vegetables, fruit, nuts, pulses, spices	tonnes	0.736155	0.82674
CPV	c040	2617	Apples and products	Vegetables, fruit, nuts, pulses, spices	tonnes	0.331493	0.789525
CPV	c041	2618	Pineapples and products	Vegetables, fruit, nuts, pulses, spices	tonnes	0.095254	0.789525
CPV	c042	2619	Dates	Vegetables, fruit, nuts, pulses, spices	tonnes	1.92952	0.789525
CPV	c043	2620	Grapes and products (excl wine)	Vegetables, fruit, nuts, pulses, spices	tonnes	0.309666	0.789525
CPV	c044	2625	Fruits, Other	Vegetables, fruit, nuts, pulses, spices	tonnes	0.456597	0.789525
CPV	c109	2848	Milk - Excluding Butter	Milk	tonnes	1.49485	0.8991
CPV	c110	2740	Butter, Ghee	Milk	tonnes	7.97306	0.8991
CPV	c113	2731	Bovine Meat	Meat	tonnes	2.05749	0.9114
CPV	c114	2732	Mutton & Goat Meat	Meat	tonnes	1.48385	0.9114
CPV	c115	2733	Pigmeat	Meat	tonnes	2.98705	0.9114
CPV	c017	2546	Beans	Vegetables, fruit, nuts, pulses, spices	tonnes	3.49356	0.9702
CPV	c018	2547	Peas	Vegetables, fruit, nuts, pulses, spices	tonnes	3.1961	0.965547
CPV	c019	2549	Pulses, Other and products	Vegetables, fruit, nuts, pulses, spices	tonnes	3.1048	0.9702
CPV	c020	2551	Nuts and products	Vegetables, fruit, nuts, pulses, spices	tonnes	2.05709	0.9702
CPV	c021	2555	Soyabeans	Oil crops	tonnes	3.10346	0.9702
CPV	c022	2552	Groundnuts	Oil crops	tonnes	1.20715	0.9702
CPV	c023	2557	Sunflower seed	Oil crops	tonnes	4.59893	0.966
CPV	c026	2560	Coconuts - Incl Copra	Oil crops	tonnes	0.845997	0.9702
CPV	c027	2561	Sesame seed	Oil crops	tonnes	5.80189	0.965669
CPV	c030	2570	Oilcrops, Other	Oil crops	tonnes	4.81674	0.966911
CPV	c111	2744	Eggs	Eggs	tonnes	1.03862	0.9603
CPV	c116	2734	Poultry Meat	Meat	tonnes	1.41117	0.9114
CPV	c123	2960	Fish, Seafood	Fish	tonnes	0.55814	0.8562
CPV	c074	2577	Palm Oil	Vegetable oils	tonnes	7.73514	0.9702
CPV	c068	2571	Soyabean Oil	Vegetable oils	tonnes	8.9611	0.9702
CPV	c069	2572	Groundnut Oil	Vegetable oils	tonnes	8.86271	0.967109
CPV	c070	2573	Sunflowerseed Oil	Vegetable oils	tonnes	6.67234	0.965923
CPV	c071	2574	Rape and Mustard Oil	Vegetable oils	tonnes	7.11596	0.96529
CPV	c072	2575	Cottonseed Oil	Vegetable oils	tonnes	7.32827	0.96705
CPV	c073	2576	Palmkernel Oil	Vegetable oils	tonnes	8.5399	0.968975
CPV	c075	2578	Coconut Oil	Vegetable oils	tonnes	8.42957	0.965137
CPV	c076	2579	Sesameseed Oil	Vegetable oils	tonnes	8.78419	0.965613
CPV	c077	2580	Olive Oil	Vegetable oils	tonnes	9.05154	0.9702
CPV	c078	2581	Ricebran Oil	Vegetable oils	tonnes	8.3408	0.9702
CPV	c079	2582	Maize Germ Oil	Vegetable oils	tonnes	8.92176	0.963509
CPV	c080	2586	Oilcrops Oil, Other	Vegetable oils	tonnes	5.7549	0.9702
CPV	c119	2737	Fats, Animals, Raw	Animal fats	tonnes	10.1035	0.9114
CPV	c015	2536	Sugar cane	Sugar crops	tonnes	0.326086	1
CPV	c016	2537	Sugar beet	Sugar crops	tonnes	0.557477	1
CPV	c065	2541	Sugar non-centrifugal	Sugar, sweeteners	tonnes	3.48406	0.94335
CPV	c066	2542	Sugar (Raw Equivalent)	Sugar, sweeteners	tonnes	3.7241	0.94335
CPV	c067	2543	Sweeteners, Other	Sugar, sweeteners	tonnes	0.391992	0.94335
CPV	c121	2745	Honey	Honey	tonnes	3.08763	0.94335
CPV	c045	2630	Coffee and products	Coffee, tea, cocoa	tonnes	0.289226	1
CPV	c046	2633	Cocoa Beans and products	Coffee, tea, cocoa	tonnes	4.05013	1
CPV	c047	2635	Tea (including mate)	Coffee, tea, cocoa	tonnes	0.0311573	1
CPV	c090	2655	Wine	Alcohol	tonnes	0.759939	1
CPV	c091	2656	Beer	Alcohol	tonnes	0.452573	1
CPV	c092	2657	Beverages, Fermented	Alcohol	tonnes	0.355754	1
CPV	c093	2658	Beverages, Alcoholic	Alcohol	tonnes	2.27402	1
CPV	c117	2735	Meat, Other	Meat	tonnes	1.33285	0.9114
CPV	c118	2736	Offals, Edible	Meat	tonnes	1.23975	0.9114
CPV	c024	2558	Rape and Mustardseed	Oil crops	tonnes	2.02361	0.951511
CPV	c025	328	Seed cotton	Oil crops	tonnes		1
CPV	c028	254	Oil, palm fruit	Oil crops	tonnes		1
CPV	c029	2563	Olives (including preserved)	Oil crops	tonnes	1.29236	0.9702
CPV	c048	677	Hops	Vegetables, fruit, nuts, pulses, spices	tonnes		1
CPV	c053	2662	Jute	Fibre crops	tonnes		1
CPV	c054	2663	Jute-Like Fibres	Fibre crops	tonnes		1
CPV	c055	2664	Soft-Fibres, Other	Fibre crops	tonnes		1
CPV	c056	2665	Sisal	Fibre crops	tonnes		1
CPV	c057	2666	Abaca	Fibre crops	tonnes		1
CPV	c058	2667	Hard Fibres, Other	Fibre crops	tonnes		1
CPV	c059	2671	Tobacco	Tobacco, rubber	tonnes		1
CPV	c060	2672	Rubber	Tobacco, rubber	tonnes		1
CPV	c061	2000	Fodder crops	Fodder crops	tonnes		1
CPV	c062	2001	Grazing	Grazing	tonnes		1
CPV	c063	2559	Cottonseed	Fibre crops	tonnes	4.90679	1
CPV	c064	2562	Palm kernels	Oil crops	tonnes		1
CPV	c081	2590	Soyabean Cake	Oil cakes	tonnes		1
CPV	c082	2591	Groundnut Cake	Oil cakes	tonnes		1
CPV	c083	2592	Sunflowerseed Cake	Oil cakes	tonnes		1
CPV	c084	2593	Rape and Mustard Cake	Oil cakes	tonnes		1
CPV	c085	2594	Cottonseed Cake	Oil cakes	tonnes		1
CPV	c086	2595	Palmkernel Cake	Oil cakes	tonnes		1
CPV	c087	2596	Copra Cake	Oil cakes	tonnes		1
CPV	c088	2597	Sesameseed Cake	Oil cakes	tonnes		1
CPV	c089	2598	Oilseed Cakes, Other	Oil cakes	tonnes		1
CPV	c094	2659	Alcohol, Non-Food	Ethanol	tonnes		1
CPV	c095	2661	Cotton lint	Fibre crops	tonnes		1
CPV	c096	866	Cattle	Live animals	1000 Head		1
CPV	c097	946	Buffaloes	Live animals	1000 Head		1
CPV	c098	976	Sheep	Live animals	1000 Head		1
CPV	c099	1016	Goats	Live animals	1000 Head		1
CPV	c100	1034	Pigs	Live animals	1000 Head		1
CPV	c101	2029	Poultry Birds	Live animals	1000 Head		1
CPV	c102	1096	Horses	Live animals	1000 Head		1
CPV	c103	1107	Asses	Live animals	1000 Head		1
CPV	c104	1110	Mules	Live animals	1000 Head		1
CPV	c105	1126	Camels	Live animals	1000 Head		1
CPV	c106	1157	Camelids, other	Live animals	1000 Head		1
CPV	c107	1140	Rabbits and hares	Live animals	1000 Head		1
CPV	c108	1150	Rodents, other	Live animals	1000 Head		1
CPV	c112	2746	Wool (Clean Eq.)	Hides, skins, wool	tonnes		1
CPV	c120	2748	Hides and skins	Hides, skins, wool	tonnes		1
CPV	c122	2747	Silk	Hides, skins, wool	tonnes		1
LKA	c001	2807	Rice and products	Cereals	tonnes	2.32354	0.9506
LKA	c002	2511	Wheat and products	Cereals	tonnes	2.54578	0.9506
LKA	c003	2513	Barley and products	Cereals	tonnes	2.52978	0.894515
LKA	c004	2514	Maize and products	Cereals	tonnes	3.16467	0.9506
LKA	c005	2515	Rye and products	Cereals	tonnes	2.39509	0.868233
LKA	c006	2516	Oats	Cereals	tonnes	2.35733	0.9506
LKA	c007	2517	Millet and products	Cereals	tonnes	4.75337	0.9506
LKA	c008	2518	Sorghum and products	Cereals	tonnes	3.0042	0.9506
LKA	c009	2520	Cereals, Other	Cereals	tonnes	2.70233	0.903639
LKA	c010	2531	Potatoes and products	Roots and tubers	tonnes	0.643512	0.86437
LKA	c011	2532	Cassava and products	Roots and tubers	tonnes	1.19998	0.86437
LKA	c013	2534	Roots, Other	Roots and tubers	tonnes	0.835499	0.912752
LKA	c014	2535	Yams	Roots and tubers	tonnes	0.878775	0.926996
LKA	c012	2533	Sweet potatoes	Roots and tubers	tonnes	0.982912	0.86437
LKA	c031	2601	Tomatoes and products	Vegetables, fruit, nuts, pulses, spices	tonnes	0.207537	0.8397
LKA	c032	2602	Onions	Vegetables, fruit, nuts, pulses, spices	tonnes	0.390345	0.8397
LKA	c033	2605	Vegetables, Other	Vegetables, fruit, nuts, pulses, spices	tonnes	0.290375	0.8397
LKA	c049	2640	Pepper	Vegetables, fruit, nuts, pulses, spices	tonnes	2.95057	0.8397
LKA	c050	2641	Pimento	Vegetables, fruit, nuts, pulses, spices	tonnes	3.16058	0.8397
LKA	c051	2642	Cloves	Vegetables, fruit, nuts, pulses, spices	tonnes	1.89944	0.840547
LKA	c052	2645	Spices, Other	Vegetables, fruit, nuts, pulses, spices	tonnes	2.50372	0.8397
LKA	c034	2611	Oranges, Mandarines	Vegetables, fruit, nuts, pulses, spices	tonnes	0.324173	0.8397
LKA	c035	2612	Lemons, Limes and products	Vegetables, fruit, nuts, pulses, spices	tonnes	0.29459	0.8397
LKA	c036	2613	Grapefruit and products	Vegetables, fruit, nuts, pulses, spices	tonnes	0.171836	0.8276
LKA	c037	2614	Citrus, Other	Vegetables, fruit, nuts, pulses, spices	tonnes	0.316574	0.8397
LKA	c038	2615	Bananas	Vegetables, fruit, nuts, pulses, spices	tonnes	0.652453	0.821068
LKA	c039	2616	Plantains	Vegetables, fruit, nuts, pulses, spices	tonnes	0.742627	0.8397
LKA	c040	2617	Apples and products	Vegetables, fruit, nuts, pulses, spices	tonnes	0.521478	0.8397
LKA	c041	2618	Pineapples and products	Vegetables, fruit, nuts, pulses, spices	tonnes	0.293191	0.8397
LKA	c042	2619	Dates	Vegetables, fruit, nuts, pulses, spices	tonnes	2.10746	0.8397
LKA	c043	2620	Grapes and products (excl wine)	Vegetables, fruit, nuts, pulses, spices	tonnes	0.754653	0.8397
LKA	c044	2625	Fruits, Other	Vegetables, fruit, nuts, pulses, spices	tonnes	0.527754	0.8397
LKA	c109	2848	Milk - Excluding Butter	Milk	tonnes	2.05865	0.891
LKA	c110	2740	Butter, Ghee	Milk	tonnes	6.10321	0.891
LKA	c113	2731	Bovine Meat	Meat	tonnes	1.7548	0.8928
LKA	c114	2732	Mutton & Goat Meat	Meat	tonnes	1.2663	0.8928
LKA	c115	2733	Pigmeat	Meat	tonnes	3.00745	0.8928
LKA	c017	2546	Beans	Vegetables, fruit, nuts, pulses, spices	tonnes	3.13873	0.9702
LKA	c018	2547	Peas	Vegetables, fruit, nuts, pulses, spices	tonnes	3.25016	0.9702
LKA	c019	2549	Pulses, Other and products	Vegetables, fruit, nuts, pulses, spices	tonnes	3.2997	0.9702
LKA	c020	2551	Nuts and products	Vegetables, fruit, nuts, pulses, spices	tonnes	0.933945	0.9702
LKA	c021	2555	Soyabeans	Oil crops	tonnes	3.10346	0.964694
LKA	c022	2552	Groundnuts	Oil crops	tonnes	2.61435	0.9702
LKA	c023	2557	Sunflower seed	Oil crops	tonnes	4.59893	0.966
LKA	c026	2560	Coconuts - Incl Copra	Oil crops	tonnes	0.858765	0.9702
LKA	c027	2561	Sesame seed	Oil crops	tonnes	5.94995	0.9702
LKA	c030	2570	Oilcrops, Other	Oil crops	tonnes	4.81674	0.966911
LKA	c111	2744	Eggs	Eggs	tonnes	1.35648	0.9506
LKA	c116	2734	Poultry Meat	Meat	tonnes	1.37591	0.8928
LKA	c123	2960	Fish, Seafood	Fish	tonnes	0.857367	0.8562
LKA	c074	2577	Palm Oil	Vegetable oils	tonnes	8.77155	0.966922
LKA	c068	2571	Soyabean Oil	Vegetable oils	tonnes	10.5657	0.9702
LKA	c069	2572	Groundnut Oil	Vegetable oils	tonnes	6.96463	0.9702
LKA	c070	2573	Sunflowerseed Oil	Vegetable oils	tonnes	8.6823	0.9702
LKA	c071	2574	Rape and Mustard Oil	Vegetable oils	tonnes	7.11596	0.9702
LKA	c072	2575	Cottonseed Oil	Vegetable oils	tonnes	7.32827	0.96705
LKA	c073	2576	Palmkernel Oil	Vegetable oils	tonnes	10.6501	0.9702
LKA	c075	2578	Coconut Oil	Vegetable oils	tonnes	3.92477	0.9702
LKA	c076	2579	Sesameseed Oil	Vegetable oils	tonnes	8.47684	0.9702
LKA	c077	2580	Olive Oil	Vegetable oils	tonnes	8.89481	0.9702
LKA	c078	2581	Ricebran Oil	Vegetable oils	tonnes	8.79102	0.9702
LKA	c079	2582	Maize Germ Oil	Vegetable oils	tonnes	8.92176	0.9702
LKA	c080	2586	Oilcrops Oil, Other	Vegetable oils	tonnes	7.78072	0.9702
LKA	c119	2737	Fats, Animals, Raw	Animal fats	tonnes	6.01491	0.8928
LKA	c015	2536	Sugar cane	Sugar crops	tonnes	0.32962	1
LKA	c016	2537	Sugar beet	Sugar crops	tonnes	0.557477	1
LKA	c065	2541	Sugar non-centrifugal	Sugar, sweeteners	tonnes	3.8622	0.94335
LKA	c066	2542	Sugar (Raw Equivalent)	Sugar, sweeteners	tonnes	3.64895	0.94335
LKA	c067	2543	Sweeteners, Other	Sugar, sweeteners	tonnes	1.39907	0.94335
LKA	c121	2745	Honey	Honey	tonnes	3.08763	0.94335
LKA	c045	2630	Coffee and products	Coffee, tea, cocoa	tonnes	0.373159	1
LKA	c046	2633	Cocoa Beans and products	Coffee, tea, cocoa	tonnes	1.88013	1
LKA	c047	2635	Tea (including mate)	Coffee, tea, cocoa	tonnes	0.0321276	1
LKA	c090	2655	Wine	Alcohol	tonnes	0.872324	1
LKA	c091	2656	Beer	Alcohol	tonnes	0.439094	1
LKA	c092	2657	Beverages, Fermented	Alcohol	tonnes	0.355754	1
LKA	c093	2658	Beverages, Alcoholic	Alcohol	tonnes	3.1293	1
LKA	c117	2735	Meat, Other	Meat	tonnes	1.33285	0.893105
LKA	c118	2736	Offals, Edible	Meat	tonnes	1.18715	0.8928
LKA	c024	2558	Rape and Mustardseed	Oil crops	tonnes	6.2586	0.951511
LKA	c025	328	Seed cotton	Oil crops	tonnes		1
LKA	c028	254	Oil, palm fruit	Oil crops	tonnes		1
LKA	c029	2563	Olives (including preserved)	Oil crops	tonnes	1.29236	0.9702
LKA	c048	677	Hops	Vegetables, fruit, nuts, pulses, spices	tonnes		1
LKA	c053	2662	Jute	Fibre crops	tonnes		1
LKA	c054	2663	Jute-Like Fibres	Fibre crops	tonnes		1
LKA	c055	2664	Soft-Fibres, Other	Fibre crops	tonnes		1
LKA	c056	2665	Sisal	Fibre crops	tonnes		1
LKA	c057	2666	Abaca	Fibre crops	tonnes		1
LKA	c058	2667	Hard Fibres, Other	Fibre crops	tonnes		1
LKA	c059	2671	Tobacco	Tobacco, rubber	tonnes		1
LKA	c060	2672	Rubber	Tobacco, rubber	tonnes		1
LKA	c061	2000	Fodder crops	Fodder crops	tonnes		1
LKA	c062	2001	Grazing	Grazing	tonnes		1
LKA	c063	2559	Cottonseed	Fibre crops	tonnes	4.90679	1
LKA	c064	2562	Palm kernels	Oil crops	tonnes		1
LKA	c081	2590	Soyabean Cake	Oil cakes	tonnes		1
LKA	c082	2591	Groundnut Cake	Oil cakes	tonnes		1
LKA	c083	2592	Sunflowerseed Cake	Oil cakes	tonnes		1
LKA	c084	2593	Rape and Mustard Cake	Oil cakes	tonnes		1
LKA	c085	2594	Cottonseed Cake	Oil cakes	tonnes		1
LKA	c086	2595	Palmkernel Cake	Oil cakes	tonnes		1
LKA	c087	2596	Copra Cake	Oil cakes	tonnes		1
LKA	c088	2597	Sesameseed Cake	Oil cakes	tonnes		1
LKA	c089	2598	Oilseed Cakes, Other	Oil cakes	tonnes		1
LKA	c094	2659	Alcohol, Non-Food	Ethanol	tonnes		1
LKA	c095	2661	Cotton lint	Fibre crops	tonnes		1
LKA	c096	866	Cattle	Live animals	1000 Head		1
LKA	c097	946	Buffaloes	Live animals	1000 Head		1
LKA	c098	976	Sheep	Live animals	1000 Head		1
LKA	c099	1016	Goats	Live animals	1000 Head		1
LKA	c100	1034	Pigs	Live animals	1000 Head		1
LKA	c101	2029	Poultry Birds	Live animals	1000 Head		1
LKA	c102	1096	Horses	Live animals	1000 Head		1
LKA	c103	1107	Asses	Live animals	1000 Head		1
LKA	c104	1110	Mules	Live animals	1000 Head		1
LKA	c105	1126	Camels	Live animals	1000 Head		1
LKA	c106	1157	Camelids, other	Live animals	1000 Head		1
LKA	c107	1140	Rabbits and hares	Live animals	1000 Head		1
LKA	c108	1150	Rodents, other	Live animals	1000 Head		1
LKA	c112	2746	Wool (Clean Eq.)	Hides, skins, wool	tonnes		1
LKA	c120	2748	Hides and skins	Hides, skins, wool	tonnes		1
LKA	c122	2747	Silk	Hides, skins, wool	tonnes		1
COG	c001	2807	Rice and products	Cereals	tonnes	2.25938	0.9702
COG	c002	2511	Wheat and products	Cereals	tonnes	2.50603	0.9702
COG	c003	2513	Barley and products	Cereals	tonnes	3.46517	0.894515
COG	c004	2514	Maize and products	Cereals	tonnes	3.28744	0.9702
COG	c005	2515	Rye and products	Cereals	tonnes	2.39509	0.868233
COG	c006	2516	Oats	Cereals	tonnes	2.35733	0.9702
COG	c007	2517	Millet and products	Cereals	tonnes	2.80841	0.947573
COG	c008	2518	Sorghum and products	Cereals	tonnes	3.0042	0.926592
COG	c009	2520	Cereals, Other	Cereals	tonnes	2.70233	0.903639
COG	c010	2531	Potatoes and products	Roots and tubers	tonnes	0.625012	0.9506
COG	c011	2532	Cassava and products	Roots and tubers	tonnes	1.099	0.9506
COG	c013	2534	Roots, Other	Roots and tubers	tonnes	0.832865	0.9506
COG	c014	2535	Yams	Roots and tubers	tonnes	0.905027	0.9506
COG	c012	2533	Sweet potatoes	Roots and tubers	tonnes	0.979589	0.9506
COG	c031	2601	Tomatoes and products	Vegetables, fruit, nuts, pulses, spices	tonnes	0.201162	0.789525
COG	c032	2602	Onions	Vegetables, fruit, nuts, pulses, spices	tonnes	0.388683	0.789525
COG	c033	2605	Vegetables, Other	Vegetables, fruit, nuts, pulses, spices	tonnes	0.294326	0.789525
COG	c049	2640	Pepper	Vegetables, fruit, nuts, pulses, spices	tonnes	2.9242	0.789525
COG	c050	2641	Pimento	Vegetables, fruit, nuts, pulses, spices	tonnes	3.20593	0.821392
COG	c051	2642	Cloves	Vegetables, fruit, nuts, pulses, spices	tonnes	2.07481	0.840547
COG	c052	2645	Spices, Other	Vegetables, fruit, nuts, pulses, spices	tonnes	2.66959	0.789525
COG	c034	2611	Oranges, Mandarines	Vegetables, fruit, nuts, pulses, spices	tonnes	0.325564	0.789525
COG	c035	2612	Lemons, Limes and products	Vegetables, fruit, nuts, pulses, spices	tonnes	0.296191	0.789525
COG	c036	2613	Grapefruit and products	Vegetables, fruit, nuts, pulses, spices	tonnes	0.230371	0.789525
COG	c037	2614	Citrus, Other	Vegetables, fruit, nuts, pulses, spices	tonnes	0.554778	0.821254
COG	c038	2615	Bananas	Vegetables, fruit, nuts, pulses, spices	tonnes	0.64987	0.789525
COG	c039	2616	Plantains	Vegetables, fruit, nuts, pulses, spices	tonnes	0.733621	0.789525
COG	c040	2617	Apples and products	Vegetables, fruit, nuts, pulses, spices	tonnes	0.442672	0.789525
COG	c041	2618	Pineapples and products	Vegetables, fruit, nuts, pulses, spices	tonnes	0.277679	0.789525
COG	c042	2619	Dates	Vegetables, fruit, nuts, pulses, spices	tonnes	1.92952	0.789525
COG	c043	2620	Grapes and products (excl wine)	Vegetables, fruit, nuts, pulses, spices	tonnes	0.452514	0.789525
COG	c044	2625	Fruits, Other	Vegetables, fruit, nuts, pulses, spices	tonnes	0.498909	0.789525
COG	c109	2848	Milk - Excluding Butter	Milk	tonnes	1.51255	0.8991
COG	c110	2740	Butter, Ghee	Milk	tonnes	7.97306	0.8991
COG	c113	2731	Bovine Meat	Meat	tonnes	1.62006	0.9114
COG	c114	2732	Mutton & Goat Meat	Meat	tonnes	1.24441	0.9114
COG	c115	2733	Pigmeat	Meat	tonnes	1.60027	0.9114
COG	c017	2546	Beans	Vegetables, fruit, nuts, pulses, spices	tonnes	3.04025	0.9702
COG	c018	2547	Peas	Vegetables, fruit, nuts, pulses, spices	tonnes	2.96339	0.9702
COG	c019	2549	Pulses, Other and products	Vegetables, fruit, nuts, pulses, spices	tonnes	3.236	0.965986
COG	c020	2551	Nuts and products	Vegetables, fruit, nuts, pulses, spices	tonnes	2.05709	0.9702
COG	c021	2555	Soyabeans	Oil crops	tonnes	3.10346	0.964694
COG	c022	2552	Groundnuts	Oil crops	tonnes	3.90807	0.9702
COG	c023	2557	Sunflower seed	Oil crops	tonnes	4.59893	0.966
COG	c026	2560	Coconuts - Incl Copra	Oil crops	tonnes	0.781614	0.9702
COG	c027	2561	Sesame seed	Oil crops	tonnes	5.80189	0.9702
COG	c030	2570	Oilcrops, Other	Oil crops	tonnes	4.86921	0.9702
COG	c111	2744	Eggs	Eggs	tonnes	1.49049	0.9603
COG	c116	2734	Poultry Meat	Meat	tonnes	1.34537	0.9114
COG	c123	2960	Fish, Seafood	Fish	tonnes	0.631566	0.8562
COG	c074	2577	Palm Oil	Vegetable oils	tonnes	8.91834	0.9702
COG	c068	2571	Soyabean Oil	Vegetable oils	tonnes	7.70043	0.9702
COG	c069	2572	Groundnut Oil	Vegetable oils	tonnes	8.37836	0.9702
COG	c070	2573	Sunflowerseed Oil	Vegetable oils	tonnes	8.67997	0.9702
COG	c071	2574	Rape and Mustard Oil	Vegetable oils	tonnes	7.11596	0.96529
COG	c072	2575	Cottonseed Oil	Vegetable oils	tonnes	7.32827	0.9702
COG	c073	2576	Palmkernel Oil	Vegetable oils	tonnes	9.31767	0.9702
COG	c075	2578	Coconut Oil	Vegetable oils	tonnes	8.42957	0.965137
COG	c076	2579	Sesameseed Oil	Vegetable oils	tonnes	8.78419	0.965613
COG	c077	2580	Olive Oil	Vegetable oils	tonnes	8.89481	0.9702
COG	c078	2581	Ricebran Oil	Vegetable oils	tonnes	8.3408	0.9702
COG	c079	2582	Maize Germ Oil	Vegetable oils	tonnes	8.92176	0.963509
COG	c080	2586	Oilcrops Oil, Other	Vegetable oils	tonnes	8.63921	0.964576
COG	c119	2737	Fats, Animals, Raw	Animal fats	tonnes	6.89214	0.9114
COG	c015	2536	Sugar cane	Sugar crops	tonnes	0.326086	1
COG	c016	2537	Sugar beet	Sugar crops	tonnes	0.557477	1
COG	c065	2541	Sugar non-centrifugal	Sugar, sweeteners	tonnes	3.48406	0.94335
COG	c066	2542	Sugar (Raw Equivalent)	Sugar, sweeteners	tonnes	3.64969	0.94335
COG	c067	2543	Sweeteners, Other	Sugar, sweeteners	tonnes	0.73239	0.94335
COG	c121	2745	Honey	Honey	tonnes	3.08763	0.94335
COG	c045	2630	Coffee and products	Coffee, tea, cocoa	tonnes	0.447148	1
COG	c046	2633	Cocoa Beans and products	Coffee, tea, cocoa	tonnes	2.48965	1
COG	c047	2635	Tea (including mate)	Coffee, tea, cocoa	tonnes	0.0311573	1
COG	c090	2655	Wine	Alcohol	tonnes	0.89519	1
COG	c091	2656	Beer	Alcohol	tonnes	0.435399	1
COG	c092	2657	Beverages, Fermented	Alcohol	tonnes	0.355754	1
COG	c093	2658	Beverages, Alcoholic	Alcohol	tonnes	3.13744	1
COG	c117	2735	Meat, Other	Meat	tonnes	1.38905	0.9114
COG	c118	2736	Offals, Edible	Meat	tonnes	1.37885	0.9114
COG	c024	2558	Rape and Mustardseed	Oil crops	tonnes	1.17477	0.951511
COG	c025	328	Seed cotton	Oil crops	tonnes		1
COG	c028	254	Oil, palm fruit	Oil crops	tonnes		1
COG	c029	2563	Olives (including preserved)	Oil crops	tonnes	1.29236	0.96352
COG	c048	677	Hops	Vegetables, fruit, nuts, pulses, spices	tonnes		1
COG	c053	2662	Jute	Fibre crops	tonnes		1
COG	c054	2663	Jute-Like Fibres	Fibre crops	tonnes		1
COG	c055	2664	Soft-Fibres, Other	Fibre crops	tonnes		1
COG	c056	2665	Sisal	Fibre crops	tonnes		1
COG	c057	2666	Abaca	Fibre crops	tonnes		1
COG	c058	2667	Hard Fibres, Other	Fibre crops	tonnes		1
COG	c059	2671	Tobacco	Tobacco, rubber	tonnes		1
COG	c060	2672	Rubber	Tobacco, rubber	tonnes		1
COG	c061	2000	Fodder crops	Fodder crops	tonnes		1
COG	c062	2001	Grazing	Grazing	tonnes		1
COG	c063	2559	Cottonseed	Fibre crops	tonnes	4.90679	1
COG	c064	2562	Palm kernels	Oil crops	tonnes		1
COG	c081	2590	Soyabean Cake	Oil cakes	tonnes		1
COG	c082	2591	Groundnut Cake	Oil cakes	tonnes		1
COG	c083	2592	Sunflowerseed Cake	Oil cakes	tonnes		1
COG	c084	2593	Rape and Mustard Cake	Oil cakes	tonnes		1
COG	c085	2594	Cottonseed Cake	Oil cakes	tonnes		1
COG	c086	2595	Palmkernel Cake	Oil cakes	tonnes		1
COG	c087	2596	Copra Cake	Oil cakes	tonnes		1
COG	c088	2597	Sesameseed Cake	Oil cakes	tonnes		1
COG	c089	2598	Oilseed Cakes, Other	Oil cakes	tonnes		1
COG	c094	2659	Alcohol, Non-Food	Ethanol	tonnes		1
COG	c095	2661	Cotton lint	Fibre crops	tonnes		1
COG	c096	866	Cattle	Live animals	1000 Head		1
COG	c097	946	Buffaloes	Live animals	1000 Head		1
COG	c098	976	Sheep	Live animals	1000 Head		1
COG	c099	1016	Goats	Live animals	1000 Head		1
COG	c100	1034	Pigs	Live animals	1000 Head		1
COG	c101	2029	Poultry Birds	Live animals	1000 Head		1
COG	c102	1096	Horses	Live animals	1000 Head		1
COG	c103	1107	Asses	Live animals	1000 Head		1
COG	c104	1110	Mules	Live animals	1000 Head		1
COG	c105	1126	Camels	Live animals	1000 Head		1
COG	c106	1157	Camelids, other	Live animals	1000 Head		1
COG	c107	1140	Rabbits and hares	Live animals	1000 Head		1
COG	c108	1150	Rodents, other	Live animals	1000 Head		1
COG	c112	2746	Wool (Clean Eq.)	Hides, skins, wool	tonnes		1
COG	c120	2748	Hides and skins	Hides, skins, wool	tonnes		1
COG	c122	2747	Silk	Hides, skins, wool	tonnes		1
BEN	c001	2807	Rice and products	Cereals	tonnes	2.3052	0.9702
BEN	c002	2511	Wheat and products	Cereals	tonnes	2.36313	0.9702
BEN	c003	2513	Barley and products	Cereals	tonnes	2.44629	0.894515
BEN	c004	2514	Maize and products	Cereals	tonnes	2.95757	0.9702
BEN	c005	2515	Rye and products	Cereals	tonnes	2.39509	0.868233
BEN	c006	2516	Oats	Cereals	tonnes	2.35733	0.912862
BEN	c007	2517	Millet and products	Cereals	tonnes	3.00593	0.9702
BEN	c008	2518	Sorghum and products	Cereals	tonnes	2.91174	0.9702
BEN	c009	2520	Cereals, Other	Cereals	tonnes	2.28657	0.9702
BEN	c010	2531	Potatoes and products	Roots and tubers	tonnes	0.584454	0.9506
BEN	c011	2532	Cassava and products	Roots and tubers	tonnes	1.17356	0.9506
BEN	c013	2534	Roots, Other	Roots and tubers	tonnes	0.637054	0.9506
BEN	c014	2535	Yams	Roots and tubers	tonnes	0.878041	0.9506
BEN	c012	2533	Sweet potatoes	Roots and tubers	tonnes	0.95655	0.9506
BEN	c031	2601	Tomatoes and products	Vegetables, fruit, nuts, pulses, spices	tonnes	0.147356	0.789525
BEN	c032	2602	Onions	Vegetables, fruit, nuts, pulses, spices	tonnes	0.385181	0.789525
BEN	c033	2605	Vegetables, Other	Vegetables, fruit, nuts, pulses, spices	tonnes	0.267728	0.789525
BEN	c049	2640	Pepper	Vegetables, fruit, nuts, pulses, spices	tonnes	2.9242	0.789525
BEN	c050	2641	Pimento	Vegetables, fruit, nuts, pulses, spices	tonnes	3.16231	0.789525
BEN	c051	2642	Cloves	Vegetables, fruit, nuts, pulses, spices	tonnes	2.07481	0.840547
BEN	c052	2645	Spices, Other	Vegetables, fruit, nuts, pulses, spices	tonnes	1.69938	0.789525
BEN	c034	2611	Oranges, Mandarines	Vegetables, fruit, nuts, pulses, spices	tonnes	0.331599	0.789525
BEN	c035	2612	Lemons, Limes and products	Vegetables, fruit, nuts, pulses, spices	tonnes	0.244313	0.789525
BEN	c036	2613	Grapefruit and products	Vegetables, fruit, nuts, pulses, spices	tonnes	0.171836	0.8276
BEN	c037	2614	Citrus, Other	Vegetables, fruit, nuts, pulses, spices	tonnes	0.554778	0.821254
BEN	c038	2615	Bananas	Vegetables, fruit, nuts, pulses, spices	tonnes	0.677502	0.789525
BEN	c039	2616	Plantains	Vegetables, fruit, nuts, pulses, spices	tonnes	0.736155	0.82674
BEN	c040	2617	Apples and products	Vegetables, fruit, nuts, pulses, spices	tonnes	0.318846	0.789525
BEN	c041	2618	Pineapples and products	Vegetables, fruit, nuts, pulses, spices	tonnes	0.290425	0.789525
BEN	c042	2619	Dates	Vegetables, fruit, nuts, pulses, spices	tonnes	2.86675	0.789525
BEN	c043	2620	Grapes and products (excl wine)	Vegetables, fruit, nuts, pulses, spices	tonnes	0.653528	0.789525
BEN	c044	2625	Fruits, Other	Vegetables, fruit, nuts, pulses, spices	tonnes	0.43129	0.789525
BEN	c109	2848	Milk - Excluding Butter	Milk	tonnes	0.768162	0.8991
BEN	c110	2740	Butter, Ghee	Milk	tonnes	7.97306	0.8991
BEN	c113	2731	Bovine Meat	Meat	tonnes	2.03359	0.9114
BEN	c114	2732	Mutton & Goat Meat	Meat	tonnes	1.72611	0.9114
BEN	c115	2733	Pigmeat	Meat	tonnes	2.32918	0.9114
BEN	c017	2546	Beans	Vegetables, fruit, nuts, pulses, spices	tonnes	3.12986	0.9702
BEN	c018	2547	Peas	Vegetables, fruit, nuts, pulses, spices	tonnes	3.1961	0.965547
BEN	c019	2549	Pulses, Other and products	Vegetables, fruit, nuts, pulses, spices	tonnes	3.3434	0.9702
BEN	c020	2551	Nuts and products	Vegetables, fruit, nuts, pulses, spices	tonnes	1.78303	0.9702
BEN	c021	2555	Soyabeans	Oil crops	tonnes	4.00374	0.964694
BEN	c022	2552	Groundnuts	Oil crops	tonnes	3.96171	0.9702
BEN	c023	2557	Sunflower seed	Oil crops	tonnes	4.59893	0.966
BEN	c026	2560	Coconuts - Incl Copra	Oil crops	tonnes	1.09209	0.9702
BEN	c027	2561	Sesame seed	Oil crops	tonnes	5.76762	0.9702
BEN	c030	2570	Oilcrops, Other	Oil crops	tonnes	4.81674	0.966911
BEN	c111	2744	Eggs	Eggs	tonnes	1.27032	0.9603
BEN	c116	2734	Poultry Meat	Meat	tonnes	1.28281	0.9114
BEN	c123	2960	Fish, Seafood	Fish	tonnes	0.666371	0.8562
BEN	c074	2577	Palm Oil	Vegetable oils	tonnes	8.85486	0.9702
BEN	c068	2571	Soyabean Oil	Vegetable oils	tonnes	8.75495	0.9702
BEN	c069	2572	Groundnut Oil	Vegetable oils	tonnes	8.93738	0.9702
BEN	c070	2573	Sunflowerseed Oil	Vegetable oils	tonnes	8.67997	0.965923
BEN	c071	2574	Rape and Mustard Oil	Vegetable oils	tonnes	7.11596	0.96529
BEN	c072	2575	Cottonseed Oil	Vegetable oils	tonnes	8.78575	0.9702
BEN	c073	2576	Palmkernel Oil	Vegetable oils	tonnes	8.69124	0.9702
BEN	c075	2578	Coconut Oil	Vegetable oils	tonnes	6.78008	0.9702
BEN	c076	2579	Sesameseed Oil	Vegetable oils	tonnes	8.78419	0.965613
BEN	c077	2580	Olive Oil	Vegetable oils	tonnes	8.89481	0.9702
BEN	c078	2581	Ricebran Oil	Vegetable oils	tonnes	8.3408	0.9702
BEN	c079	2582	Maize Germ Oil	Vegetable oils	tonnes	8.92176	0.963509
BEN	c080	2586	Oilcrops Oil, Other	Vegetable oils	tonnes	6.409	0.9702
BEN	c119	2737	Fats, Animals, Raw	Animal fats	tonnes	8.12244	0.9114
BEN	c015	2536	Sugar cane	Sugar crops	tonnes	0.326086	1
BEN	c016	2537	Sugar beet	Sugar crops	tonnes	0.557477	1
BEN	c065	2541	Sugar non-centrifugal	Sugar, sweeteners	tonnes	3.48406	0.94335
BEN	c066	2542	Sugar (Raw Equivalent)	Sugar, sweeteners	tonnes	3.62835	0.94335
BEN	c067	2543	Sweeteners, Other	Sugar, sweeteners	tonnes	0.403948	0.94335
BEN	c121	2745	Honey	Honey	tonnes	3.08763	0.94335
BEN	c045	2630	Coffee and products	Coffee, tea, cocoa	tonnes	0.341279	1
BEN	c046	2633	Cocoa Beans and products	Coffee, tea, cocoa	tonnes	4.33153	1
BEN	c047	2635	Tea (including mate)	Coffee, tea, cocoa	tonnes	0.0311573	1
BEN	c090	2655	Wine	Alcohol	tonnes	0.557841	1
BEN	c091	2656	Beer	Alcohol	tonnes	0.433846	1
BEN	c092	2657	Beverages, Fermented	Alcohol	tonnes	0.323871	1
BEN	c093	2658	Beverages, Alcoholic	Alcohol	tonnes	2.32885	1
BEN	c117	2735	Meat, Other	Meat	tonnes	1.32972	0.9114
BEN	c118	2736	Offals, Edible	Meat	tonnes	1.24515	0.9114
BEN	c024	2558	Rape and Mustardseed	Oil crops	tonnes	0.593926	0.951511
BEN	c025	328	Seed cotton	Oil crops	tonnes		1
BEN	c028	254	Oil, palm fruit	Oil crops	tonnes		1
BEN	c029	2563	Olives (including preserved)	Oil crops	tonnes	1.29236	0.9702
BEN	c048	677	Hops	Vegetables, fruit, nuts, pulses, spices	tonnes		1
BEN	c053	2662	Jute	Fibre crops	tonnes		1
BEN	c054	2663	Jute-Like Fibres	Fibre crops	tonnes		1
BEN	c055	2664	Soft-Fibres, Other	Fibre crops	tonnes		1
BEN	c056	2665	Sisal	Fibre crops	tonnes		1
BEN	c057	2666	Abaca	Fibre crops	tonnes		1
BEN	c058	2667	Hard Fibres, Other	Fibre crops	tonnes		1
BEN	c059	2671	Tobacco	Tobacco, rubber	tonnes		1
BEN	c060	2672	Rubber	Tobacco, rubber	tonnes		1
BEN	c061	2000	Fodder crops	Fodder crops	tonnes		1
BEN	c062	2001	Grazing	Grazing	tonnes		1
BEN	c063	2559	Cottonseed	Fibre crops	tonnes	4.90679	1
BEN	c064	2562	Palm kernels	Oil crops	tonnes		1
BEN	c081	2590	Soyabean Cake	Oil cakes	tonnes		1
BEN	c082	2591	Groundnut Cake	Oil cakes	tonnes		1
BEN	c083	2592	Sunflowerseed Cake	Oil cakes	tonnes		1
BEN	c084	2593	Rape and Mustard Cake	Oil cakes	tonnes		1
BEN	c085	2594	Cottonseed Cake	Oil cakes	tonnes		1
BEN	c086	2595	Palmkernel Cake	Oil cakes	tonnes		1
BEN	c087	2596	Copra Cake	Oil cakes	tonnes		1
BEN	c088	2597	Sesameseed Cake	Oil cakes	tonnes		1
BEN	c089	2598	Oilseed Cakes, Other	Oil cakes	tonnes		1
BEN	c094	2659	Alcohol, Non-Food	Ethanol	tonnes		1
BEN	c095	2661	Cotton lint	Fibre crops	tonnes		1
BEN	c096	866	Cattle	Live animals	1000 Head		1
BEN	c097	946	Buffaloes	Live animals	1000 Head		1
BEN	c098	976	Sheep	Live animals	1000 Head		1
BEN	c099	1016	Goats	Live animals	1000 Head		1
BEN	c100	1034	Pigs	Live animals	1000 Head		1
BEN	c101	2029	Poultry Birds	Live animals	1000 Head		1
BEN	c102	1096	Horses	Live animals	1000 Head		1
BEN	c103	1107	Asses	Live animals	1000 Head		1
BEN	c104	1110	Mules	Live animals	1000 Head		1
BEN	c105	1126	Camels	Live animals	1000 Head		1
BEN	c106	1157	Camelids, other	Live animals	1000 Head		1
BEN	c107	1140	Rabbits and hares	Live animals	1000 Head		1
BEN	c108	1150	Rodents, other	Live animals	1000 Head		1
BEN	c112	2746	Wool (Clean Eq.)	Hides, skins, wool	tonnes		1
BEN	c120	2748	Hides and skins	Hides, skins, wool	tonnes		1
BEN	c122	2747	Silk	Hides, skins, wool	tonnes		1
EGY	c001	2807	Rice and products	Cereals	tonnes	2.38351	0.8448
EGY	c002	2511	Wheat and products	Cereals	tonnes	2.8024	0.8448
EGY	c003	2513	Barley and products	Cereals	tonnes	2.52978	0.8448
EGY	c004	2514	Maize and products	Cereals	tonnes	3.3453	0.8448
EGY	c005	2515	Rye and products	Cereals	tonnes	0.0401721	0.868233
EGY	c006	2516	Oats	Cereals	tonnes	2.35733	0.912862
EGY	c007	2517	Millet and products	Cereals	tonnes	2.80841	0.947573
EGY	c008	2518	Sorghum and products	Cereals	tonnes	3.17628	0.8448
EGY	c009	2520	Cereals, Other	Cereals	tonnes	2.70233	0.903639
EGY	c010	2531	Potatoes and products	Roots and tubers	tonnes	0.638255	0.911558
EGY	c011	2532	Cassava and products	Roots and tubers	tonnes	1.07948	0.908826
EGY	c013	2534	Roots, Other	Roots and tubers	tonnes	0.838139	0.911558
EGY	c014	2535	Yams	Roots and tubers	tonnes	0.878775	0.926996
EGY	c012	2533	Sweet potatoes	Roots and tubers	tonnes	0.970951	0.911558
EGY	c031	2601	Tomatoes and products	Vegetables, fruit, nuts, pulses, spices	tonnes	0.200839	0.85415
EGY	c032	2602	Onions	Vegetables, fruit, nuts, pulses, spices	tonnes	0.387651	0.85415
EGY	c033	2605	Vegetables, Other	Vegetables, fruit, nuts, pulses, spices	tonnes	0.285761	0.85415
EGY	c049	2640	Pepper	Vegetables, fruit, nuts, pulses, spices	tonnes	3.07853	0.85415
EGY	c050	2641	Pimento	Vegetables, fruit, nuts, pulses, spices	tonnes	3.17921	0.85415
EGY	c051	2642	Cloves	Vegetables, fruit, nuts, pulses, spices	tonnes	2.07481	0.85415
EGY	c052	2645	Spices, Other	Vegetables, fruit, nuts, pulses, spices	tonnes	3.31951	0.85415
EGY	c034	2611	Oranges, Mandarines	Vegetables, fruit, nuts, pulses, spices	tonnes	0.332481	0.85415
EGY	c035	2612	Lemons, Limes and products	Vegetables, fruit, nuts, pulses, spices	tonnes	0.299827	0.85415
EGY	c036	2613	Grapefruit and products	Vegetables, fruit, nuts, pulses, spices	tonnes	0.171836	0.8276
EGY	c037	2614	Citrus, Other	Vegetables, fruit, nuts, pulses, spices	tonnes	0.388866	0.85415
EGY	c038	2615	Bananas	Vegetables, fruit, nuts, pulses, spices	tonnes	0.652313	0.85415
EGY	c039	2616	Plantains	Vegetables, fruit, nuts, pulses, spices	tonnes	0.736155	0.82674
EGY	c040	2617	Apples and products	Vegetables, fruit, nuts, pulses, spices	tonnes	0.514783	0.85415
EGY	c041	2618	Pineapples and products	Vegetables, fruit, nuts, pulses, spices	tonnes	0.277762	0.85415
EGY	c042	2619	Dates	Vegetables, fruit, nuts, pulses, spices	tonnes	1.99497	0.85415
EGY	c043	2620	Grapes and products (excl wine)	Vegetables, fruit, nuts, pulses, spices	tonnes	0.647749	0.85415
EGY	c044	2625	Fruits, Other	Vegetables, fruit, nuts, pulses, spices	tonnes	0.469233	0.85415
EGY	c109	2848	Milk - Excluding Butter	Milk	tonnes	1.29156	0.9016
EGY	c110	2740	Butter, Ghee	Milk	tonnes	7.42815	0.9016
EGY	c113	2731	Bovine Meat	Meat	tonnes	1.57743	0.874
EGY	c114	2732	Mutton & Goat Meat	Meat	tonnes	1.98322	0.874
EGY	c115	2733	Pigmeat	Meat	tonnes	1.94433	0.874
EGY	c017	2546	Beans	Vegetables, fruit, nuts, pulses, spices	tonnes	3.13065	0.9604
EGY	c018	2547	Peas	Vegetables, fruit, nuts, pulses, spices	tonnes	3.72186	0.9604
EGY	c019	2549	Pulses, Other and products	Vegetables, fruit, nuts, pulses, spices	tonnes	3.18337	0.9604
EGY	c020	2551	Nuts and products	Vegetables, fruit, nuts, pulses, spices	tonnes	1.61895	0.9604
EGY	c021	2555	Soyabeans	Oil crops	tonnes	3.10346	0.964694
EGY	c022	2552	Groundnuts	Oil crops	tonnes	4.36199	0.9604
EGY	c023	2557	Sunflower seed	Oil crops	tonnes	4.59893	0.966
EGY	c026	2560	Coconuts - Incl Copra	Oil crops	tonnes	1.30031	0.9604
EGY	c027	2561	Sesame seed	Oil crops	tonnes	5.81571	0.9604
EGY	c030	2570	Oilcrops, Other	Oil crops	tonnes	4.81674	0.966911
EGY	c111	2744	Eggs	Eggs	tonnes	1.25785	0.8448
EGY	c116	2734	Poultry Meat	Meat	tonnes	1.3813	0.874
EGY	c123	2960	Fish, Seafood	Fish	tonnes	0.685696	0.8908
EGY	c074	2577	Palm Oil	Vegetable oils	tonnes	7.73514	0.966922
EGY	c068	2571	Soyabean Oil	Vegetable oils	tonnes	8.92211	0.9604
EGY	c069	2572	Groundnut Oil	Vegetable oils	tonnes	8.9668	0.9604
EGY	c070	2573	Sunflowerseed Oil	Vegetable oils	tonnes	8.929	0.9604
EGY	c071	2574	Rape and Mustard Oil	Vegetable oils	tonnes	7.11596	0.96529
EGY	c072	2575	Cottonseed Oil	Vegetable oils	tonnes	0.340258	0.9604
EGY	c073	2576	Palmkernel Oil	Vegetable oils	tonnes	8.5399	0.9604
EGY	c075	2578	Coconut Oil	Vegetable oils	tonnes	8.65228	0.9604
EGY	c076	2579	Sesameseed Oil	Vegetable oils	tonnes	8.78419	0.965613
EGY	c077	2580	Olive Oil	Vegetable oils	tonnes	8.91369	0.9604
EGY	c078	2581	Ricebran Oil	Vegetable oils	tonnes	8.3408	0.9702
EGY	c079	2582	Maize Germ Oil	Vegetable oils	tonnes	8.81463	0.9604
EGY	c080	2586	Oilcrops Oil, Other	Vegetable oils	tonnes	8.35723	0.9604
EGY	c119	2737	Fats, Animals, Raw	Animal fats	tonnes	6.72629	0.874
EGY	c015	2536	Sugar cane	Sugar crops	tonnes	0.327188	1
EGY	c016	2537	Sugar beet	Sugar crops	tonnes	0.557477	1
EGY	c065	2541	Sugar non-centrifugal	Sugar, sweeteners	tonnes	3.48406	0.94335
EGY	c066	2542	Sugar (Raw Equivalent)	Sugar, sweeteners	tonnes	3.67656	0.94335
EGY	c067	2543	Sweeteners, Other	Sugar, sweeteners	tonnes	0.82085	0.94335
EGY	c121	2745	Honey	Honey	tonnes	4.27753	0.94335
EGY	c045	2630	Coffee and products	Coffee, tea, cocoa	tonnes	0.286864	1
EGY	c046	2633	Cocoa Beans and products	Coffee, tea, cocoa	tonnes	1.83035	1
EGY	c047	2635	Tea (including mate)	Coffee, tea, cocoa	tonnes	0.0311573	1
EGY	c090	2655	Wine	Alcohol	tonnes	0.777733	1
EGY	c091	2656	Beer	Alcohol	tonnes	0.434615	1
EGY	c092	2657	Beverages, Fermented	Alcohol	tonnes	0.355754	1
EGY	c093	2658	Beverages, Alcoholic	Alcohol	tonnes	2.72479	1
EGY	c117	2735	Meat, Other	Meat	tonnes	1.2136	0.874
EGY	c118	2736	Offals, Edible	Meat	tonnes	1.20638	0.874
EGY	c024	2558	Rape and Mustardseed	Oil crops	tonnes	0.974602	0.951511
EGY	c025	328	Seed cotton	Oil crops	tonnes		1
EGY	c028	254	Oil, palm fruit	Oil crops	tonnes		1
EGY	c029	2563	Olives (including preserved)	Oil crops	tonnes	1.33785	0.9604
EGY	c048	677	Hops	Vegetables, fruit, nuts, pulses, spices	tonnes		1
EGY	c053	2662	Jute	Fibre crops	tonnes		1
EGY	c054	2663	Jute-Like Fibres	Fibre crops	tonnes		1
EGY	c055	2664	Soft-Fibres, Other	Fibre crops	tonnes		1
EGY	c056	2665	Sisal	Fibre crops	tonnes		1
EGY	c057	2666	Abaca	Fibre crops	tonnes		1
EGY	c058	2667	Hard Fibres, Other	Fibre crops	tonnes		1
EGY	c059	2671	Tobacco	Tobacco, rubber	tonnes		1
EGY	c060	2672	Rubber	Tobacco, rubber	tonnes		1
EGY	c061	2000	Fodder crops	Fodder crops	tonnes		1
EGY	c062	2001	Grazing	Grazing	tonnes		1
EGY	c063	2559	Cottonseed	Fibre crops	tonnes	4.90679	1
EGY	c064	2562	Palm kernels	Oil crops	tonnes		1
EGY	c081	2590	Soyabean Cake	Oil cakes	tonnes		1
EGY	c082	2591	Groundnut Cake	Oil cakes	tonnes		1
EGY	c083	2592	Sunflowerseed Cake	Oil cakes	tonnes		1
EGY	c084	2593	Rape and Mustard Cake	Oil cakes	tonnes		1
EGY	c085	2594	Cottonseed Cake	Oil cakes	tonnes		1
EGY	c086	2595	Palmkernel Cake	Oil cakes	tonnes		1
EGY	c087	2596	Copra Cake	Oil cakes	tonnes		1
EGY	c088	2597	Sesameseed Cake	Oil cakes	tonnes		1
EGY	c089	2598	Oilseed Cakes, Other	Oil cakes	tonnes		1
EGY	c094	2659	Alcohol, Non-Food	Ethanol	tonnes		1
EGY	c095	2661	Cotton lint	Fibre crops	tonnes		1
EGY	c096	866	Cattle	Live animals	1000 Head		1
EGY	c097	946	Buffaloes	Live animals	1000 Head		1
EGY	c098	976	Sheep	Live animals	1000 Head		1
EGY	c099	1016	Goats	Live animals	1000 Head		1
EGY	c100	1034	Pigs	Live animals	1000 Head		1
EGY	c101	2029	Poultry Birds	Live animals	1000 Head		1
EGY	c102	1096	Horses	Live animals	1000 Head		1
EGY	c103	1107	Asses	Live animals	1000 Head		1
EGY	c104	1110	Mules	Live animals	1000 Head		1
EGY	c105	1126	Camels	Live animals	1000 Head		1
EGY	c106	1157	Camelids, other	Live animals	1000 Head		1
EGY	c107	1140	Rabbits and hares	Live animals	1000 Head		1
EGY	c108	1150	Rodents, other	Live animals	1000 Head		1
EGY	c112	2746	Wool (Clean Eq.)	Hides, skins, wool	tonnes		1
EGY	c120	2748	Hides and skins	Hides, skins, wool	tonnes		1
EGY	c122	2747	Silk	Hides, skins, wool	tonnes		1
DJI	c001	2807	Rice and products	Cereals	tonnes	2.2552	0.9702
DJI	c002	2511	Wheat and products	Cereals	tonnes	2.67966	0.9702
DJI	c003	2513	Barley and products	Cereals	tonnes	2.52978	0.894515
DJI	c004	2514	Maize and products	Cereals	tonnes	2.20795	0.9702
DJI	c005	2515	Rye and products	Cereals	tonnes	2.39509	0.868233
DJI	c006	2516	Oats	Cereals	tonnes	2.39721	0.912862
DJI	c007	2517	Millet and products	Cereals	tonnes	2.80841	0.947573
DJI	c008	2518	Sorghum and products	Cereals	tonnes	3.70167	0.926592
DJI	c009	2520	Cereals, Other	Cereals	tonnes	2.70233	0.9702
DJI	c010	2531	Potatoes and products	Roots and tubers	tonnes	0.633403	0.9506
DJI	c011	2532	Cassava and products	Roots and tubers	tonnes	1.07948	0.908826
DJI	c013	2534	Roots, Other	Roots and tubers	tonnes	0.86439	0.9506
DJI	c014	2535	Yams	Roots and tubers	tonnes	0.878775	0.926996
DJI	c012	2533	Sweet potatoes	Roots and tubers	tonnes	0.969722	0.915269
DJI	c031	2601	Tomatoes and products	Vegetables, fruit, nuts, pulses, spices	tonnes	0.121226	0.789525
DJI	c032	2602	Onions	Vegetables, fruit, nuts, pulses, spices	tonnes	0.401378	0.789525
DJI	c033	2605	Vegetables, Other	Vegetables, fruit, nuts, pulses, spices	tonnes	0.265509	0.789525
DJI	c049	2640	Pepper	Vegetables, fruit, nuts, pulses, spices	tonnes	2.9242	0.789525
DJI	c050	2641	Pimento	Vegetables, fruit, nuts, pulses, spices	tonnes	1.84096	0.789525
DJI	c051	2642	Cloves	Vegetables, fruit, nuts, pulses, spices	tonnes	2.07481	0.840547
DJI	c052	2645	Spices, Other	Vegetables, fruit, nuts, pulses, spices	tonnes	3.74492	0.789525
DJI	c034	2611	Oranges, Mandarines	Vegetables, fruit, nuts, pulses, spices	tonnes	0.293638	0.789525
DJI	c035	2612	Lemons, Limes and products	Vegetables, fruit, nuts, pulses, spices	tonnes	0.273576	0.789525
DJI	c036	2613	Grapefruit and products	Vegetables, fruit, nuts, pulses, spices	tonnes	0.171836	0.789531
DJI	c037	2614	Citrus, Other	Vegetables, fruit, nuts, pulses, spices	tonnes	0.554778	0.789525
DJI	c038	2615	Bananas	Vegetables, fruit, nuts, pulses, spices	tonnes	0.60504	0.789525
DJI	c039	2616	Plantains	Vegetables, fruit, nuts, pulses, spices	tonnes	0.736155	0.82674
DJI	c040	2617	Apples and products	Vegetables, fruit, nuts, pulses, spices	tonnes	0.457558	0.789525
DJI	c041	2618	Pineapples and products	Vegetables, fruit, nuts, pulses, spices	tonnes	0.105348	0.789525
DJI	c042	2619	Dates	Vegetables, fruit, nuts, pulses, spices	tonnes	2.04485	0.789525
DJI	c043	2620	Grapes and products (excl wine)	Vegetables, fruit, nuts, pulses, spices	tonnes	0.474541	0.789525
DJI	c044	2625	Fruits, Other	Vegetables, fruit, nuts, pulses, spices	tonnes	0.560263	0.789525
DJI	c109	2848	Milk - Excluding Butter	Milk	tonnes	2.22379	0.8991
DJI	c110	2740	Butter, Ghee	Milk	tonnes	7.97306	0.8991
DJI	c113	2731	Bovine Meat	Meat	tonnes	2.11816	0.9114
DJI	c114	2732	Mutton & Goat Meat	Meat	tonnes	1.55257	0.9114
DJI	c115	2733	Pigmeat	Meat	tonnes	2.20423	0.9114
DJI	c017	2546	Beans	Vegetables, fruit, nuts, pulses, spices	tonnes	2.57559	0.9702
DJI	c018	2547	Peas	Vegetables, fruit, nuts, pulses, spices	tonnes	3.20733	0.9702
DJI	c019	2549	Pulses, Other and products	Vegetables, fruit, nuts, pulses, spices	tonnes	3.14249	0.9702
DJI	c020	2551	Nuts and products	Vegetables, fruit, nuts, pulses, spices	tonnes	2.05709	0.964951
DJI	c021	2555	Soyabeans	Oil crops	tonnes	3.10346	0.964694
DJI	c022	2552	Groundnuts	Oil crops	tonnes	3.7968	0.9702
DJI	c023	2557	Sunflower seed	Oil crops	tonnes	4.59893	0.966
DJI	c026	2560	Coconuts - Incl Copra	Oil crops	tonnes	0.879414	0.964897
DJI	c027	2561	Sesame seed	Oil crops	tonnes	5.55726	0.965669
DJI	c030	2570	Oilcrops, Other	Oil crops	tonnes	4.81674	0.966911
DJI	c111	2744	Eggs	Eggs	tonnes	1.73904	0.9603
DJI	c116	2734	Poultry Meat	Meat	tonnes	1.23677	0.9114
DJI	c123	2960	Fish, Seafood	Fish	tonnes	0.773945	0.8562
DJI	c074	2577	Palm Oil	Vegetable oils	tonnes	9.31885	0.9702
DJI	c068	2571	Soyabean Oil	Vegetable oils	tonnes	7.78518	0.9702
DJI	c069	2572	Groundnut Oil	Vegetable oils	tonnes	8.86271	0.9702
DJI	c070	2573	Sunflowerseed Oil	Vegetable oils	tonnes	5.14086	0.9702
DJI	c071	2574	Rape and Mustard Oil	Vegetable oils	tonnes	7.11596	0.96529
DJI	c072	2575	Cottonseed Oil	Vegetable oils	tonnes	7.32827	0.96705
DJI	c073	2576	Palmkernel Oil	Vegetable oils	tonnes	7.74293	0.968975
DJI	c075	2578	Coconut Oil	Vegetable oils	tonnes	8.42957	0.9702
DJI	c076	2579	Sesameseed Oil	Vegetable oils	tonnes	8.78419	0.965613
DJI	c077	2580	Olive Oil	Vegetable oils	tonnes	8.89481	0.9702
DJI	c078	2581	Ricebran Oil	Vegetable oils	tonnes	8.3408	0.9702
DJI	c079	2582	Maize Germ Oil	Vegetable oils	tonnes	8.92176	0.963509
DJI	c080	2586	Oilcrops Oil, Other	Vegetable oils	tonnes	7.59367	0.9702
DJI	c119	2737	Fats, Animals, Raw	Animal fats	tonnes	4.00592	0.9114
DJI	c015	2536	Sugar cane	Sugar crops	tonnes	0.326086	1
DJI	c016	2537	Sugar beet	Sugar crops	tonnes	0.557477	1
DJI	c065	2541	Sugar non-centrifugal	Sugar, sweeteners	tonnes	3.48406	0.94335
DJI	c066	2542	Sugar (Raw Equivalent)	Sugar, sweeteners	tonnes	3.6984	0.94335
DJI	c067	2543	Sweeteners, Other	Sugar, sweeteners	tonnes	0.591837	0.94335
DJI	c121	2745	Honey	Honey	tonnes	3.08763	0.94335
DJI	c045	2630	Coffee and products	Coffee, tea, cocoa	tonnes	0.371634	1
DJI	c046	2633	Cocoa Beans and products	Coffee, tea, cocoa	tonnes	6.79559	1
DJI	c047	2635	Tea (including mate)	Coffee, tea, cocoa	tonnes	0.0311573	1
DJI	c090	2655	Wine	Alcohol	tonnes	0.782909	1
DJI	c091	2656	Beer	Alcohol	tonnes	0.591591	1
DJI	c092	2657	Beverages, Fermented	Alcohol	tonnes	0.355754	1
DJI	c093	2658	Beverages, Alcoholic	Alcohol	tonnes	3.41058	1
DJI	c117	2735	Meat, Other	Meat	tonnes	0.861221	0.9114
DJI	c118	2736	Offals, Edible	Meat	tonnes	1.15554	0.9114
DJI	c024	2558	Rape and Mustardseed	Oil crops	tonnes	0.518041	0.951511
DJI	c025	328	Seed cotton	Oil crops	tonnes		1
DJI	c028	254	Oil, palm fruit	Oil crops	tonnes		1
DJI	c029	2563	Olives (including preserved)	Oil crops	tonnes	1.29236	0.96352
DJI	c048	677	Hops	Vegetables, fruit, nuts, pulses, spices	tonnes		1
DJI	c053	2662	Jute	Fibre crops	tonnes		1
DJI	c054	2663	Jute-Like Fibres	Fibre crops	tonnes		1
DJI	c055	2664	Soft-Fibres, Other	Fibre crops	tonnes		1
DJI	c056	2665	Sisal	Fibre crops	tonnes		1
DJI	c057	2666	Abaca	Fibre crops	tonnes		1
DJI	c058	2667	Hard Fibres, Other	Fibre crops	tonnes		1
DJI	c059	2671	Tobacco	Tobacco, rubber	tonnes		1
DJI	c060	2672	Rubber	Tobacco, rubber	tonnes		1
DJI	c061	2000	Fodder crops	Fodder crops	tonnes		1
DJI	c062	2001	Grazing	Grazing	tonnes		1
DJI	c063	2559	Cottonseed	Fibre crops	tonnes	4.90679	1
DJI	c064	2562	Palm kernels	Oil crops	tonnes		1
DJI	c081	2590	Soyabean Cake	Oil cakes	tonnes		1
DJI	c082	2591	Groundnut Cake	Oil cakes	tonnes		1
DJI	c083	2592	Sunflowerseed Cake	Oil cakes	tonnes		1
DJI	c084	2593	Rape and Mustard Cake	Oil cakes	tonnes		1
DJI	c085	2594	Cottonseed Cake	Oil cakes	tonnes		1
DJI	c086	2595	Palmkernel Cake	Oil cakes	tonnes		1
DJI	c087	2596	Copra Cake	Oil cakes	tonnes		1
DJI	c088	2597	Sesameseed Cake	Oil cakes	tonnes		1
DJI	c089	2598	Oilseed Cakes, Other	Oil cakes	tonnes		1
DJI	c094	2659	Alcohol, Non-Food	Ethanol	tonnes		1
DJI	c095	2661	Cotton lint	Fibre crops	tonnes		1
DJI	c096	866	Cattle	Live animals	1000 Head		1
DJI	c097	946	Buffaloes	Live animals	1000 Head		1
DJI	c098	976	Sheep	Live animals	1000 Head		1
DJI	c099	1016	Goats	Live animals	1000 Head		1
DJI	c100	1034	Pigs	Live animals	1000 Head		1
DJI	c101	2029	Poultry Birds	Live animals	1000 Head		1
DJI	c102	1096	Horses	Live animals	1000 Head		1
DJI	c103	1107	Asses	Live animals	1000 Head		1
DJI	c104	1110	Mules	Live animals	1000 Head		1
DJI	c105	1126	Camels	Live animals	1000 Head		1
DJI	c106	1157	Camelids, other	Live animals	1000 Head		1
DJI	c107	1140	Rabbits and hares	Live animals	1000 Head		1
DJI	c108	1150	Rodents, other	Live animals	1000 Head		1
DJI	c112	2746	Wool (Clean Eq.)	Hides, skins, wool	tonnes		1
DJI	c120	2748	Hides and skins	Hides, skins, wool	tonnes		1
DJI	c122	2747	Silk	Hides, skins, wool	tonnes		1
GHA	c001	2807	Rice and products	Cereals	tonnes	2.07328	0.9702
GHA	c002	2511	Wheat and products	Cereals	tonnes	2.36802	0.9702
GHA	c003	2513	Barley and products	Cereals	tonnes	2.52211	0.9702
GHA	c004	2514	Maize and products	Cereals	tonnes	3.14504	0.9702
GHA	c005	2515	Rye and products	Cereals	tonnes	2.39509	0.868233
GHA	c006	2516	Oats	Cereals	tonnes	1.96745	0.9702
GHA	c007	2517	Millet and products	Cereals	tonnes	2.96103	0.9702
GHA	c008	2518	Sorghum and products	Cereals	tonnes	2.9328	0.9702
GHA	c009	2520	Cereals, Other	Cereals	tonnes	3.57399	0.9702
GHA	c010	2531	Potatoes and products	Roots and tubers	tonnes	0.627937	0.9506
GHA	c011	2532	Cassava and products	Roots and tubers	tonnes	1.19184	0.9506
GHA	c013	2534	Roots, Other	Roots and tubers	tonnes	0.839502	0.9506
GHA	c014	2535	Yams	Roots and tubers	tonnes	0.881319	0.9506
GHA	c012	2533	Sweet potatoes	Roots and tubers	tonnes	0.965073	0.9506
GHA	c031	2601	Tomatoes and products	Vegetables, fruit, nuts, pulses, spices	tonnes	0.136468	0.789525
GHA	c032	2602	Onions	Vegetables, fruit, nuts, pulses, spices	tonnes	0.38589	0.789525
GHA	c033	2605	Vegetables, Other	Vegetables, fruit, nuts, pulses, spices	tonnes	0.291687	0.789525
GHA	c049	2640	Pepper	Vegetables, fruit, nuts, pulses, spices	tonnes	3.25499	0.789525
GHA	c050	2641	Pimento	Vegetables, fruit, nuts, pulses, spices	tonnes	3.15166	0.789525
GHA	c051	2642	Cloves	Vegetables, fruit, nuts, pulses, spices	tonnes	1.97625	0.840547
GHA	c052	2645	Spices, Other	Vegetables, fruit, nuts, pulses, spices	tonnes	3.49448	0.789525
GHA	c034	2611	Oranges, Mandarines	Vegetables, fruit, nuts, pulses, spices	tonnes	0.335096	0.789525
GHA	c035	2612	Lemons, Limes and products	Vegetables, fruit, nuts, pulses, spices	tonnes	0.171733	0.789525
GHA	c036	2613	Grapefruit and products	Vegetables, fruit, nuts, pulses, spices	tonnes	0.193814	0.789531
GHA	c037	2614	Citrus, Other	Vegetables, fruit, nuts, pulses, spices	tonnes	1.47348	0.821254
GHA	c038	2615	Bananas	Vegetables, fruit, nuts, pulses, spices	tonnes	0.644658	0.789525
GHA	c039	2616	Plantains	Vegetables, fruit, nuts, pulses, spices	tonnes	0.735806	0.789525
GHA	c040	2617	Apples and products	Vegetables, fruit, nuts, pulses, spices	tonnes	0.277526	0.789525
GHA	c041	2618	Pineapples and products	Vegetables, fruit, nuts, pulses, spices	tonnes	0.281868	0.789525
GHA	c042	2619	Dates	Vegetables, fruit, nuts, pulses, spices	tonnes	1.92952	0.819737
GHA	c043	2620	Grapes and products (excl wine)	Vegetables, fruit, nuts, pulses, spices	tonnes	0.484455	0.789525
[truncated: 4,766 more rows]

## Sheet: S7
iso3c	comm_code	item_code	item	comm_group	unit	energy_content (kcal/g)	eat_ratio (1- food waste ratio)
[truncated: 3,198 more rows]

[truncated: 24 more sheets: S8, S9, S10, S11, S12, S13, S14, S15, S16, S17, S18, S19, S20, S21, S22, S23, S24, S25, S26, S27 …]
